# Supplementary material for: Solvent selection for biphasic extraction of 5-hydroxymethylfurfural via multiscale modeling and experiments
Source: Royal Society of Chemistry journal article supplement (doi:10.1039/d0gc03251d), 2020-01-01
Supplement: d0gc03251d1.xlsx [file d0gc03251d1.xlsx]

## Sheet: HMF
Name	Org_in_Water_Mole_Fraction, 423K	P_HMF,423K	Water_in_Org_Mole_Fraction, 423K	Org_in_Water_Mole_Fraction, 298K	P_HMF, 298K	Water_in_Org_Mole_Fraction, 298 K	#
1,1,1,2,2,3,4,5,5,5-Decafluoropentane.coskf	5.7e-05	0.282144	0.02348	4e-06	0.0322681	0.000152	1
1,1,1,2,2-Pentafluoropropane	0.001387	0.369256	0.020145	0.000207	0.0220948	0.000106	2
1,1,1,2,3,3,3-Heptafluoropropane	0.000721	0.595676	0.029064	9.6e-05	0.100149	0.000217	3
1,1,1,2,3,3-Hexafluoropropane	0.00385	1.7303	0.062696	0.000562	0.383077	0.000434	4
1,1,1,2-Tetrachlorodifluoroethane	0.000141	0.0998808	0.010048	1.3e-05	0.00279054	4.5e-05	5
1,1,1,2-Tetrachloroethane	0.000833	0.459946	0.027757	9.7e-05	0.0375579	0.000155	6
1,1,1,2-Tetrafluoroethane	0.0106	1.47172	0.050655	0.002014	0.183829	0.000275	7
1,1,1,3,3,3-Hexafluoropropane	0.00179	0.930988	0.038922	0.000267	0.134785	0.000246	8
1,1,1,3,3-Pentachloropropane	0.000141	0.281617	0.023474	1e-05	0.020117	0.000126	9
1,1,1,3,3-Pentafluorobutane	0.002259	1.03659	0.052979	0.000247	0.121494	0.000304	10
1,1,1,3,3-Pentafluoropropane	0.004864	1.44687	0.057893	0.00066	0.214243	0.000336	11
1,1,1-Trichloroethane	0.001256	0.336367	0.0198	0.000177	0.0180312	0.000102	12
1,1,1-Trichlorofluoroethane	0.001615	0.591826	0.031734	0.000215	0.0503041	0.000178	13
1,1,1-Trichlorotrifluoroethane	0.00019	0.0919719	0.009061	2e-05	0.002236	4e-05	14
1,1,1-Trifluoroethane	0.010832	1.00042	0.036063	0.002274	0.0851452	0.000186	15
1,1,2,2,3-Pentafluoropropane	0.00587	1.6538	0.064692	0.000829	0.275994	0.000379	16
1,1,2,2-Tetrabromoethane	0.000471	0.539885	0.035152	4.3e-05	0.055446	0.000207	17
1,1,2,2-Tetrachlorodifluoroethane	0.000132	0.0970179	0.009882	1.2e-05	0.00265082	4.4e-05	18
1,1,2,2-Tetrachloroethane	0.001094	0.703124	0.036925	0.000129	0.0820319	0.000225	19
1,1,2,2-Tetrafluoroethane	0.018742	2.89688	0.091513	0.003798	0.701775	0.000644	20
1,1,2,2-Tetraphenylethane	0	0.166656	0.034151	0	0.012317	0.000181	21
1,1,2-Trichloroethane	0.003297	1.01546	0.046627	0.000411	0.114768	0.000266	22
1,1,2-Trichlorotrifluoroethane	0.000186	0.0949098	0.009262	1.9e-05	0.00239509	4.1e-05	23
1,1,2-Trifluoroethane	0.033738	2.6343	0.112509	0.005543	0.48742	0.000684	24
1,1,2-Trimethylcyclopentane	5.8e-05	0.0555138	0.00757	4e-06	0.00091697	2.9e-05	25
1,1,2-Triphenylethane	2e-06	0.16508	0.027395	0	0.0105279	0.000138	26
1,1,3-Trimethylcyclohexane	2.5e-05	0.0495244	0.007585	1e-06	0.000818665	2.8e-05	27
1,1,3-Trimethylcyclopentane	4.3e-05	0.0525505	0.007344	3e-06	0.000832352	2.7e-05	28
1,1-Dibromoethane	0.003453	0.719976	0.035488	0.000476	0.0574317	0.000191	29
1,1-Dichloro-1-fluoroethane	0.00259	0.478329	0.023889	0.000403	0.0298546	0.000124	30
1,1-Dichloroethane	0.005677	0.850999	0.037693	0.000895	0.0711739	0.000202	31
1,1-Dichloroethene	0.003181	0.391814	0.018338	0.000561	0.0212066	9.6e-05	32
1,1-Dichloropropane	0.001565	0.478459	0.026845	0.000214	0.0314916	0.000143	33
1,1-Dichlorotetrafluoroethane	0.000255	0.0828686	0.008048	2.9e-05	0.00168004	3.4e-05	34
1,1-Diethylcyclohexane	1.2e-05	0.0408435	0.007217	1e-06	0.000621543	2.5e-05	35
1,1-Difluoroethane	0.029946	1.80651	0.076056	0.0057	0.191689	0.000355	36
1,1-Difluoroethylene	0.011788	0.664618	0.02213	0.002981	0.043987	0.000119	37
1,1-Dimethoxyethane	0.017752	2.40543	0.382223	0.033882	2.15604	0.68626	38
1,1-Dimethylcyclohexane	6.4e-05	0.0548157	0.007452	5e-06	0.000883157	2.8e-05	39
1,1-Dimethylcyclopentane	0.000122	0.0636589	0.007556	1.1e-05	0.00104949	2.9e-05	40
1,1-Diphenylethane	1.9e-05	0.185737	0.023246	1e-06	0.0103618	0.000114	41
1,2,3,4,6,7,8-Heptachlorodibenzo-p-dioxin.coskf	0	0.0648187	0.014289	0	0.00248508	5.9e-05	42
1,2,3,4,7,8-Hexachlorodibenzo-p-dioxin.coskf	0	0.0815985	0.0159	0	0.00369507	7e-05	43
1,2,3,4,7-Pentachlorodibenzo-p-dioxin.coskf	0	0.0945325	0.016749	0	0.00447825	7.5e-05	44
1,2,3,4-Tetrachlorodibenzo-p-dioxin	1e-06	0.102987	0.016978	0	0.00475093	7.7e-05	45
1,2,3,4-Tetrahydronaphthalene	0.000107	0.158596	0.016521	8e-06	0.00629828	7.8e-05	46
1,2,3,4-Tetramethylbenzene	6.9e-05	0.155081	0.017219	5e-06	0.00645219	8.2e-05	47
1,2,3,4-Tetramethylcyclohexane	1.1e-05	0.0423108	0.007385	1e-06	0.000667323	2.6e-05	48
1,2,3,5-Tetraethylbenzene	1e-06	0.0670199	0.012711	0	0.00205247	5.2e-05	49
1,2,3,5-Tetramethylbenzene	5.3e-05	0.144612	0.016379	3e-06	0.0057767	7.6e-05	50
1,2,3,6-Tetrahydrobenzaldehyde	0.00515	1.48417	0.177357	0.0022	1.18381	0.074374	51
1,2,3,6-Tetrahydrobenzyl_alcohol	0.005465	1.76479	0.295856	0.001617	1.40171	0.228941	52
1,2,3,7-Tetrachlorodibenzo-p-dioxin	1e-06	0.116954	0.018287	0	0.00632657	8.7e-05	53
1,2,3-Benzenetriol.coskf	miscible	#VALUE!	#VALUE!	miscible	#VALUE!	#VALUE!	54
1,2,3-Butanetriol.coskf	miscible	#VALUE!	#VALUE!	miscible	#VALUE!	#VALUE!	55
1,2,3-Trichlorobenzene	0.000144	0.199878	0.017625	1.2e-05	0.0101953	8.7e-05	56
1,2,3-Trichloropropane	0.003762	1.43588	0.078896	0.000306	0.194564	0.000516	57
1,2,3-Triethylbenzene	9e-06	0.0962266	0.014387	0	0.00335644	6.3e-05	58
1,2,3-Trimethyl-4-ethylbenzene	3e-05	0.13926	0.017426	2e-06	0.00588322	8.3e-05	59
1,2,3-Trimethylbenzene	0.000174	0.199565	0.018701	1.5e-05	0.00898299	9.2e-05	60
1,2,3-Trimethylindene	3.3e-05	0.154233	0.018498	2e-06	0.00699141	8.8e-05	61
1,2,4,5-Tetraisopropylbenzene	0	0.060215	0.014456	0	0.00210562	6e-05	62
1,2,4,5-Tetramethylbenzene	4.6e-05	0.133946	0.015543	3e-06	0.00507398	7.1e-05	63
1,2,4-Butanetriol.coskf	miscible	#VALUE!	#VALUE!	miscible	#VALUE!	#VALUE!	64
1,2,4-Trichlorobenzene	0.000132	0.217442	0.018569	1.1e-05	0.0123056	9.5e-05	65
1,2,4-Trichlorodibenzo-p-dioxin	3e-06	0.131403	0.018985	0	0.00705934	9.3e-05	66
1,2,4-Triethylbenzene	6e-06	0.0894734	0.013708	0	0.00297891	5.9e-05	67
1,2,4-Trimethyl-3-ethylbenzene	3.4e-05	0.143353	0.017808	2e-06	0.00616467	8.6e-05	68
1,2,4-Trimethyl-5-ethylbenzene	2.6e-05	0.138607	0.017419	1e-06	0.00587998	8.3e-05	69
1,2,4-Trimethylbenzene	0.000131	0.183126	0.017625	1e-05	0.00787403	8.5e-05	70
1,2-Benzenedicarboxylic_acid,_heptyl,_nonyl_ester.coskf	0	0.124515	0.053523	0	0.0442317	0.007507	71
1,2-Benzene_dicarboxylic_acid,_heptyl,_undecyl_ester.coskf	0	0.0923858	0.043052	0	0.0274166	0.004873	72
1,2-Benzenediol	0.078778	2.3582	0.740788	0.055492	6.07448	0.788334	73
1,2-Butadiene	0.005121	0.557168	0.024777	0.000909	0.0317199	0.000128	74
1,2-Butanediol.coskf	miscible	#VALUE!	#VALUE!	miscible	#VALUE!	#VALUE!	75
1,2-dibromododecane	0	0.0986613	0.018521	0	0.00485489	8.7e-05	76
1,2-Dibromoethane	0.004145	0.937998	0.0448	0.000523	0.0853896	0.000242	77
1,2-Dibromotetrafluoroethane	0.000191	0.108613	0.009946	2e-05	0.00328102	4.7e-05	78
1,2-Dichloro-1,1,2-trifluoroethane	0.00123	0.585438	0.028255	0.000177	0.0689011	0.000183	79
1,2-Dichloro-4-nitrobenzene	0.000413	0.576899	0.055397	4.2e-05	0.117853	0.00167	80
1,2-Dichlorobenzene	0.000396	0.279402	0.020144	4.2e-05	0.015831	0.000104	81
1,2-Dichlorobutane	0.001221	0.614065	0.039052	0.000125	0.0485787	0.000217	82
1,2-Dichloroethane	0.007308	1.16339	0.050216	0.001085	0.112372	0.000267	83
1,2-Dichlorohexafluorocyclobutane	4.7e-05	0.0722158	0.008985	3e-06	0.00173159	3.7e-05	84
1,2-Dichloropropane	0.004312	1.00278	0.053907	0.000481	0.0916176	0.000294	85
1,2-Dichlorotetrafluoroethane	0.000237	0.0808638	0.00795	2.7e-05	0.00160395	3.3e-05	86
1,2-Diethoxyethane	0.000729	1.01463	0.163455	0.00063	1.34112	0.257107	87
1,2-Difluorobenzene	0.001527	0.495546	0.027144	0.00021	0.0350032	0.000144	88
1,2-Difluoroethane	0.035253	1.98259	0.094749	0.005852	0.217438	0.000463	89
1,2-Dimethoxyethane	0.011418	2.22488	0.309567	0.019243	2.48189	0.560205	90
1,2-Dimethoxypropane	0.005349	1.8535	0.28538	0.007201	2.35876	0.528617	91
1,2-Dimethyl-3-hydroxy-4-pyridone.coskf	miscible	#VALUE!	#VALUE!	miscible	#VALUE!	#VALUE!	92
1,2-Dimethyl-3-propylbenzene	2.5e-05	0.13852	0.017347	1e-06	0.00586823	8.2e-05	93
1,2-Diphenylethane	1.7e-05	0.201967	0.024833	1e-06	0.0117577	0.000124	94
1,2-Epoxy-2-methylpropane	0.02763	2.38929	0.3349	0.029626	2.57733	0.455172	95
1,2-Epoxy-3-phenoxypropane	0.001187	1.06483	0.117611	0.000178	0.473624	0.013592	96
1,2-Ethanediamine.coskf	miscible	#VALUE!	#VALUE!	miscible	#VALUE!	#VALUE!	97
1,2-Ethanediol.coskf	miscible	#VALUE!	#VALUE!	miscible	#VALUE!	#VALUE!	98
1,2-ethane_diphosphonic_acid.coskf	miscible	#VALUE!	#VALUE!	0.066214	2.05058	0.85386	99
1,2-Ethanedithiol	0.007267	1.37691	0.076707	0.000813	0.138886	0.000454	100
1,2-Hexadiene	0.000406	0.233996	0.016925	4.6e-05	0.00996754	8.3e-05	101
1,2-Pentadiene	0.001398	0.344399	0.019411	0.000205	0.0165817	0.0001	102
1,2-Propadiene	0.02169	1.16249	0.040471	0.005149	0.0964282	0.000202	103
1,2-Propanediamine.coskf	miscible	#VALUE!	#VALUE!	miscible	#VALUE!	#VALUE!	104
1,2-Propylene_glycol.coskf	miscible	#VALUE!	#VALUE!	miscible	#VALUE!	#VALUE!	105
1,3,5,7-Cyclooctatetraene	0.001108	0.47064	0.032169	0.000122	0.0311327	0.000172	106
1,3,5-Trichlorobenzene	9.6e-05	0.191253	0.017071	7e-06	0.0102757	8.6e-05	107
1,3,5-Triethylbenzene	4e-06	0.0816975	0.012859	0	0.00254526	5.4e-05	108
1,3,5-Triisopropylbenzene	0	0.0738297	0.014387	0	0.00259494	6.1e-05	109
1,3,5-Trinitrobenzene	0.001312	1.20368	0.121957	5.8e-05	0.211326	0.001991	110
1,3,5-Tri-tert-butylbenzene	0	0.0573209	0.013703	0	0.00188131	5.5e-05	111
1,3,6,8-Tetrachlorodibenzo-p-dioxin	1e-06	0.118859	0.01851	0	0.00665471	8.9e-05	112
1,3-Benzenediol.coskf	miscible	#VALUE!	#VALUE!	miscible	#VALUE!	#VALUE!	113
1,3-Butadiene	0.006055	0.6179	0.027139	0.001095	0.0372216	0.000139	114
1,3-Butanediol.coskf	miscible	#VALUE!	#VALUE!	miscible	#VALUE!	#VALUE!	115
1,3-Cyclohexadiene	0.001592	0.337544	0.020867	0.00024	0.0159467	0.000107	116
1,3-dichloro-2-propanol	0.009467	2.44367	0.225228	0.00263	3.00567	0.094991	117
1,3-Dichlorobenzene	0.000336	0.282696	0.020188	3.4e-05	0.0167715	0.000105	118
1,3-Dichlorohexafluoropropane	5e-05	0.0567558	0.007557	4e-06	0.00103791	3e-05	119
1,3-Dichloropropane	0.00429	1.10154	0.057939	0.000448	0.105627	0.000317	120
1,3-Dichloro-trans-2-butene	0.000997	0.502573	0.031047	0.000109	0.0354116	0.000168	121
1,3-Difluorobenzene	0.001584	0.548788	0.028902	0.000217	0.0425449	0.000157	122
1,3-Dimethyl-2-imidazolidinone	0.05777	1.75174	0.766127	miscible	#VALUE!	#VALUE!	123
1,3-Dimethyl-5-nitrobenzene	0.000378	0.573898	0.06219	4.7e-05	0.152677	0.003903	124
1,3-Dimethyladamantane	9e-06	0.0389235	0.007339	0	0.000599491	2.6e-05	125
1,3-Dimethyl_urea.coskf	miscible	#VALUE!	#VALUE!	miscible	#VALUE!	#VALUE!	126
1,3-Dimethylxanthine.coskf	miscible	#VALUE!	#VALUE!	miscible	#VALUE!	#VALUE!	127
1,3-Dioxane.coskf	miscible	#VALUE!	#VALUE!	miscible	#VALUE!	#VALUE!	128
1,3-Dioxolane.coskf	miscible	#VALUE!	#VALUE!	miscible	#VALUE!	#VALUE!	129
1,3-Diphenyltriazene	7.3e-05	0.894602	0.108649	6e-06	2.86094	0.047867	130
1,3-Di-tert-butyl_glycerin	4.3e-05	0.628216	0.17702	2.7e-05	0.888939	0.318095	131
1,3-Propanediamine.coskf	miscible	#VALUE!	#VALUE!	miscible	#VALUE!	#VALUE!	132
1,3-Propylene_glycol.coskf	miscible	#VALUE!	#VALUE!	miscible	#VALUE!	#VALUE!	133
1,3-Propylene_oxide.coskf	miscible	#VALUE!	#VALUE!	miscible	#VALUE!	#VALUE!	134
1,4-Benzenedicarboxylic_acid,_2-hydroxyethyl_methyl_ester.coskf	0.000896	1.44711	0.300761	0.000393	1.3241	0.185333	135
1,4-Benzenedicarboxylic_acid,bis(2,3-dihydroxypropyl)ester.coskf	0.000866	1.56599	0.498984	0.000537	1.60327	0.463469	136
1,4-Bis(3-aminopropyl)piperazine	0.001086	2.13714	0.68065	0.001424	2.41708	0.822441	137
1,4-Butanediisocyanate	0.000272	0.510443	0.042195	1.8e-05	0.0402865	0.000255	138
1,4-Butanediol.coskf	miscible	#VALUE!	#VALUE!	miscible	#VALUE!	#VALUE!	139
1,4-Cyclohexadiene	0.001486	0.323912	0.020022	0.000221	0.0150023	0.000103	140
1,4-Cyclohexanedicarboxylic_acid	0.097843	1.19533	0.843021	0.03536	2.76801	0.730722	141
1,4-Cyclohexanedimethanol	0.008145	1.83022	0.536967	0.00553	1.48542	0.587064	142
1,4-Dibromobenzene	0.000262	0.312524	0.023252	2.4e-05	0.0206477	0.000121	143
1,4-Dichlorobenzene	0.000386	0.322424	0.022364	4e-05	0.0207603	0.000117	144
1,4-Dichlorobutane	0.001239	0.701707	0.045031	0.000114	0.0558928	0.000248	145
1,4-Dichloro-cis-2-butene	0.001979	0.981915	0.053108	0.000202	0.102082	0.000303	146
1,4-Dichloro-trans-2-butene	0.001313	0.755449	0.043508	0.000127	0.0661197	0.000242	147
1,4-Dicyano-2-butene	0.050163	1.91867	0.536284	0.008773	1.30413	0.078175	148
1,4-Difluorobenzene	0.001864	0.631559	0.032542	0.000256	0.0523308	0.000178	149
1,4-Dioxane.coskf	miscible	#VALUE!	#VALUE!	miscible	#VALUE!	#VALUE!	150
1,4-Di-tert-butylbenzene	2e-06	0.0791048	0.01391	0	0.00269297	5.8e-05	151
1,4-Hexadiene	0.000564	0.295683	0.020465	6.4e-05	0.0143474	0.000105	152
1,4-Pentadiene	0.001768	0.411125	0.022926	0.000265	0.021512	0.000118	153
1,5,9-Cyclododecatriene	1.7e-05	0.113533	0.016347	1e-06	0.00447724	7.6e-05	154
1,5-Cyclooctadiene	0.00029	0.203108	0.018407	2.9e-05	0.0087734	9.3e-05	155
1,5-Dichloropentane	0.000409	0.49379	0.037636	3.1e-05	0.0359291	0.000207	156
1,5-Hexadiene	0.000611	0.300195	0.020668	7e-05	0.0146454	0.000106	157
1,5-Naphthalene_diisocyanate	2.1e-05	0.229843	0.026284	1e-06	0.0152708	0.000139	158
1,5-Pentanediamine	0.018008	2.40786	0.735648	0.019995	2.23277	0.848085	159
1,5-Pentanediol.coskf	miscible	#VALUE!	#VALUE!	miscible	#VALUE!	#VALUE!	160
1,6-Hexamethylene_diisocyanate	3.1e-05	0.290069	0.032168	1e-06	0.0203372	0.000193	161
1,6-Hexanediol	0.023271	1.93243	0.686446	0.018175	1.68524	0.747581	162
1,6-Hexanediol_diacrylate	3.1e-05	0.670951	0.147097	9e-06	0.443654	0.045303	163
1,9-Decadiene	6e-06	0.107385	0.014751	0	0.00391714	6.6e-05	164
1-Acetyl-2-naphthol	0.000253	0.609811	0.083048	3.5e-05	0.272394	0.011384	165
1-Amino-2-propanol.coskf	miscible	#VALUE!	#VALUE!	miscible	#VALUE!	#VALUE!	166
1-Bromobutane	0.000894	0.347969	0.022804	0.00011	0.0182553	0.000119	167
1-Bromododecane	0	0.0611844	0.012629	0	0.00191495	5.1e-05	168
1-Bromoheptane	2.9e-05	0.144089	0.016395	2e-06	0.00589811	7.7e-05	169
1-Bromonaphthalene	9.4e-05	0.215315	0.020302	6e-06	0.0119073	0.000101	170
1-Bromopropane	0.0029	0.517532	0.027478	0.000434	0.030452	0.000145	171
1-Butanamine	0.008855	2.56173	0.459982	0.005889	3.08642	0.558027	172
1-Butanol	0.01941	2.20695	0.440326	0.009224	1.73555	0.424188	173
1-Buten-3-yne	0.015439	1.63343	0.062432	0.002818	0.191666	0.000331	174
1-Butene	0.002486	0.295043	0.016161	0.000431	0.0112471	8e-05	175
1-Butyne	0.009745	1.20885	0.052908	0.001675	0.106843	0.000288	176
1-Chloro-1,1-difluoroethane	0.005228	0.663845	0.028177	0.00091	0.047742	0.000148	177
1-Chloro-2,4-dinitrobenzene	0.001062	1.00411	0.096538	7.7e-05	0.196894	0.002117	178
1-Chloro-2-propanol	0.028685	2.59658	0.386373	0.014818	3.06296	0.343565	179
1-Chloro-3-propanol	0.044305	2.67951	0.491269	0.013709	4.34232	0.27948	180
1-Chlorobutane	0.001076	0.355658	0.022554	0.000141	0.0182933	0.000117	181
1-Chlorodibenzo-p-dioxin	2.4e-05	0.204213	0.023182	1e-06	0.0129477	0.000123	182
1-Chlorohexane	9.6e-05	0.180601	0.01723	7e-06	0.0076535	8.4e-05	183
1-Chloronaphthalene	0.000116	0.221472	0.020181	8e-06	0.0121925	0.0001	184
1-Chlorooctane	9e-06	0.112688	0.014785	0	0.00416121	6.7e-05	185
1-Chloropentane	0.000322	0.248326	0.019329	3.3e-05	0.0116005	9.9e-05	186
1-Chloropropane	0.003797	0.552022	0.027846	0.000603	0.0326129	0.000147	187
1-Chlorotetradecane	0	0.0487671	0.011805	0	0.00139138	4.5e-05	188
1-cis-2-trans-3-Trimethylcyclopentane.coskf	4.1e-05	0.0510659	0.00725	3e-06	0.000796587	2.7e-05	189
1-cis-2-trans-4-Trimethylcyclopentane.coskf	3.8e-05	0.0502263	0.007171	3e-06	0.000769976	2.6e-05	190
1-Decanol	2.5e-05	0.499326	0.145661	3e-06	0.279401	0.129672	191
1-Decene	2e-06	0.0649252	0.010302	0	0.00165078	4.2e-05	192
1-Decyne	1e-05	0.158221	0.019488	0	0.00827066	0.000102	193
1-Dodecanol	3e-06	0.350626	0.121113	0	0.185418	0.101721	194
1-Dodecene	0	0.0497892	0.009818	0	0.0011791	3.7e-05	195
1-Eicosanol	0	0.134526	0.07534	0	0.0606525	0.051901	196
1-Eicosene	0	0.0264069	0.009299	0	0.000539328	3e-05	197
1-Ethoxy-2-propanol	0.012847	2.18067	0.455403	0.009739	2.02016	0.542049	198
1-Ethyl-2-isopropylbenzene	2.3e-05	0.120537	0.015546	1e-06	0.00457316	7e-05	199
1-Ethylcyclohexene	7.2e-05	0.0890968	0.010108	6e-06	0.00223382	4.5e-05	200
1-Ethylnaphthalene	4.8e-05	0.175882	0.019244	3e-06	0.0085248	9.2e-05	201
1-Ethyltetralin	2.2e-05	0.122759	0.01627	1e-06	0.0048592	7.5e-05	202
1-Heptadecanol	0	0.17878	0.086496	0	0.0837302	0.063971	203
1-Heptadecene	0	0.0317372	0.009375	0	0.00067313	3.1e-05	204
1-Heptanol	0.000568	0.983295	0.213253	0.000137	0.57315	0.195469	205
1-Heptene	7.3e-05	0.114293	0.011919	6e-06	0.00336855	5.3e-05	206
1-Heptyne	0.000275	0.343687	0.026566	2.4e-05	0.0219642	0.00015	207
1-Hexadecanol	0	0.184732	0.084641	0	0.0958478	0.071079	208
1-Hexadecene	0	0.0345214	0.009462	0	0.000749949	3.3e-05	209
1-Hexanamine	0.00107	1.7239	0.379324	0.000462	2.07328	0.485352	210
1-Hexanol	0.001852	1.35992	0.263909	0.000646	0.895115	0.258293	211
1-Hexene	0.000237	0.150478	0.012988	2.5e-05	0.0047798	6e-05	212
1-Hexyne	0.00088	0.48688	0.030947	9.7e-05	0.0338598	0.000178	213
1H-Imidazole.coskf	miscible	#VALUE!	#VALUE!	miscible	#VALUE!	#VALUE!	214
1-Isopropoxy-2-propanol	0.002744	1.69954	0.314397	0.002543	1.92439	0.508288	215
1-Methoxy-2-propanol_propanoate	0.001549	1.47908	0.247478	0.001792	1.89009	0.283744	216
1-Methyl-1-ethylcyclopentane	4.4e-05	0.0512958	0.007241	3e-06	0.00079668	2.7e-05	217
1-Methyl-2-nitrobenzene	0.001726	0.960931	0.094721	0.000319	0.368449	0.009526	218
1-Methyl-2-n-propylbenzene	5.5e-05	0.152933	0.016995	3e-06	0.00637036	8e-05	219
1-Methyl-3-hydroxy-5-isopropyl_benzene.coskf	0.000531	2.201	0.226269	0.000116	16.6176	0.244804	220
1-Methyl-3-hydroxy-6-isopropyl_benzene.coskf	0.00081	2.32352	0.239483	0.000184	16.3846	0.249552	221
1-Methyl-3-(methylethoxy)benzene	8.4e-05	0.313283	0.038606	7e-06	0.0839031	0.002744	222
1-Methyl-3-nitrobenzene	0.001262	0.845581	0.080406	0.000197	0.263144	0.005993	223
1-Methyl-3-n-propylbenzene	3.5e-05	0.132258	0.015411	2e-06	0.0050014	7e-05	224
1-Methyl-4-n-propylbenzene	3.2e-05	0.128915	0.01514	2e-06	0.0048001	6.8e-05	225
1-Methyl-4-vinylcyclohexene	7.9e-05	0.143359	0.015571	6e-06	0.00537597	7.3e-05	226
1-Methylcyclohexanol	0.003556	1.39327	0.304806	0.001377	1.08713	0.361691	227
1-Methylcyclohexene	0.0002	0.109667	0.010599	2.1e-05	0.00284972	4.8e-05	228
1-Methylcyclopentene	0.000517	0.146334	0.011582	6.7e-05	0.00414393	5.4e-05	229
1-Methylindan	0.000109	0.176154	0.017965	8e-06	0.00766187	8.7e-05	230
1-Methylindene	0.000207	0.25668	0.022561	1.7e-05	0.0138064	0.000113	231
1-Methylnaphthalene	0.000136	0.234969	0.021887	1e-05	0.0126831	0.000108	232
1-Methylpiperidine	0.000847	0.898278	0.197204	0.00029	0.889492	0.304669	233
1-Methyltetralin	5.9e-05	0.14948	0.017268	4e-06	0.00623122	8.2e-05	234
1-Methylvinyl_acetate	0.006919	1.65156	0.166112	0.002345	0.922731	0.031887	235
1-n-Butylnaphthalene	6e-06	0.120806	0.017114	0	0.00528795	7.7e-05	236
1-n-Decylnaphthalene	0	0.0531332	0.013338	0	0.00173486	5.1e-05	237
1-n-Hexyl-1,2,3,4-tetrahydronaphthalene.coskf	0	0.0649054	0.01333	0	0.00209856	5.4e-05	238
1-n-Hexylnaphthalene	1e-06	0.0855746	0.01525	0	0.00328431	6.4e-05	239
1-Nitrobutane	0.005152	1.39443	0.111286	0.000859	0.410815	0.006147	240
1-Nitropropane	0.013739	1.80732	0.141446	0.003093	0.567059	0.007747	241
1-n-Nonylnaphthalene	0	0.0586893	0.013688	0	0.00198278	5.3e-05	242
1-Nonadecanol	0	0.144665	0.07699	0	0.0652634	0.053142	243
1-Nonadecene	0	0.0278783	0.009307	0	0.000574828	3e-05	244
1-Nonanol	6.8e-05	0.610952	0.162345	1e-05	0.351259	0.148213	245
1-Nonene	7e-06	0.0760578	0.010681	0	0.00201625	4.5e-05	246
1-Nonyne	3.1e-05	0.198302	0.021197	1e-06	0.0110273	0.000114	247
1-n-Pentylnaphthalene	2e-06	0.100037	0.016021	0	0.00405229	7e-05	248
1-n-Propylnaphthalene	1.8e-05	0.145644	0.018212	1e-06	0.00675293	8.5e-05	249
1-Octadecanol	0	0.16134	0.082276	0	0.0751161	0.059748	250
1-Octadecene	0	0.0297072	0.009334	0	0.000620773	3.1e-05	251
1-Octanol	0.000186	0.754331	0.183261	3.5e-05	0.42085	0.163815	252
1-Octene	2.3e-05	0.0918366	0.011218	1e-06	0.0025608	4.9e-05	253
1-Octyne	8.7e-05	0.253354	0.023379	6e-06	0.0150085	0.000129	254
1-Pentadecanol	0	0.227539	0.09743	0	0.110548	0.075105	255
1-Pentadecene	0	0.0370718	0.009492	0	0.000815791	3.3e-05	256
1-Pentanamine	0.002843	2.04748	0.39603	0.001341	2.52828	0.499427	257
1-Pentanol	0.005812	1.72852	0.318821	0.001973	1.18516	0.303162	258
1-Pentene-3-yne	0.003753	0.738503	0.035668	0.000522	0.0530478	0.000189	259
1-Pentene-4-yne	0.006571	1.24941	0.059071	0.000855	0.123318	0.000327	260
1-Pentene	0.000716	0.198326	0.014018	9.6e-05	0.00670636	6.7e-05	261
1-Pentyne	0.00297	0.732175	0.038253	0.000392	0.0563487	0.000218	262
1-Phenyl-1-propanol	0.000948	1.2097	0.171507	0.000179	1.01297	0.092868	263
1-Phenyl-2-propanol	0.001263	1.30915	0.220464	0.000487	1.43838	0.2631	264
1-Phenylethanone	0.004819	1.62313	0.213783	0.002304	1.71018	0.152995	265
1-Phenylindene	3e-05	0.252088	0.029079	1e-06	0.0171668	0.000152	266
1-Phenylnaphthalene	1.1e-05	0.175906	0.022684	0	0.0100871	0.00011	267
1-Propanamine	0.032371	2.66194	0.565889	0.022923	3.10757	0.652967	268
1-Propanol	0.121124	1.47826	0.698773	0.055009	1.85389	0.633611	269
1-Propoxypropane	0.000372	0.645981	0.112764	0.000168	0.78514	0.215133	270
1-Propyl_acrylate	0.001565	1.07351	0.124238	0.000598	0.586179	0.029407	271
1-tert-Butoxy-2-[2-(hydroxy)propoxy]propane.coskf	0.000152	0.983993	0.28304	0.000134	1.32624	0.514936	272
1-Tetradecanol	0	0.257967	0.103699	0	0.129406	0.08289	273
1-Tetradecene	0	0.0407354	0.009605	0	0.000920543	3.5e-05	274
1-trans-3,5-Trimethylcyclohexane	2.2e-05	0.0479612	0.007476	1e-06	0.000779692	2.7e-05	275
1-Tridecanoic_acid	7e-06	0.717304	0.184067	1e-06	0.929925	0.141301	276
1-Tridecanol	1e-06	0.294046	0.11009	0	0.150358	0.089035	277
1-Tridecene	0	0.0449012	0.009711	0	0.00103931	3.6e-05	278
1-Undecanol	8e-06	0.410783	0.131884	1e-06	0.222229	0.113696	279
1-Undecene	1e-06	0.056628	0.010046	0	0.00139438	4e-05	280
2-2-2-Butoxyethoxy-ethoxy-ethanol	0.000136	1.0656	0.291871	0.000106	1.07796	0.346014	281
2,2',2''-Nitrilotrisacetonitrile	0.057431	1.53106	0.622158	0.001879	0.803689	0.043395	282
2,2,2-Trifluoroethanol.coskf	miscible	#VALUE!	#VALUE!	0.140041	2.47376	0.725056	283
2,2',3,3',4,4',5,5',6-Nonachlorobiphenyl.coskf	0	0.0502328	0.012746	0	0.00170247	5e-05	284
2,2',3,3',4,4',5,5'-Octachlorobiphenyl.coskf	0	0.0603568	0.013937	0	0.00233975	5.7e-05	285
2,2',3,3',4,4',5,6,6'-Nonachlorobiphenyl.coskf	0	0.0467151	0.012171	0	0.00150176	4.7e-05	286
2,2',3,3',4,4',5,6-Octachlorobiphenyl.coskf	0	0.0619821	0.014102	0	0.00238901	5.8e-05	287
2,2',3,3',4,4',5,6'-Octachlorobiphenyl.coskf	0	0.060515	0.013938	0	0.00239247	5.8e-05	288
2,2',3,3',4,4',5-Heptachlorobiphenyl.coskf	0	0.073547	0.015226	0	0.00318755	6.5e-05	289
2,2',3,3',4,4',6,6'-Octachlorobiphenyl.coskf	0	0.0583981	0.013595	0	0.00225698	5.6e-05	290
2,2',3,3',4,4',6-Heptachlorobiphenyl.coskf	0	0.0750539	0.015398	0	0.00333944	6.7e-05	291
2,2',3,3',4,4'-Hexachlorobiphenyl	0	0.0906924	0.016711	0	0.00438599	7.5e-05	292
2,2',3,3',4,5,5',6,6'-Nonachlorobiphenyl.coskf	0	0.0487847	0.012448	0	0.00161947	4.9e-05	293
2,2',3,3',4,5,5',6-Octachlorobiphenyl.coskf	0	0.0613867	0.014052	0	0.00242608	5.8e-05	294
2,2',3,3',4,5,5',6'-Octachlorobiphenyl.coskf	0	0.0631271	0.014304	0	0.00259664	6e-05	295
2,2',3,3',4,5,5'-Heptachlorobiphenyl.coskf	0	0.0737515	0.015274	0	0.00329038	6.6e-05	296
2,2',3,3',4,5,6,6'-Octachlorobiphenyl.coskf	0	0.0618169	0.013991	0	0.00239167	5.8e-05	297
2,2',3,3',4,5',6,6'-Octachlorobiphenyl.coskf	0	0.0609806	0.013924	0	0.00243431	5.8e-05	298
2,2',3,3',4,5,6-Heptachlorobiphenyl	0	0.0718588	0.014976	0	0.00294553	6.3e-05	299
2,2',3,3',4,5,6'-Heptachlorobiphenyl.coskf	0	0.077152	0.015647	0	0.00352769	6.9e-05	300
2,2',3,3',4,5',6-Heptachlorobiphenyl.coskf	0	0.0754468	0.015433	0	0.00346173	6.8e-05	301
2,2',3,3',4,5',6'-Heptachlorobiphenyl.coskf	0	0.0782211	0.015788	0	0.00360533	7e-05	302
2,2',3,3',4,5-Hexachlorobiphenyl	0	0.0865163	0.016213	0	0.00399485	7.2e-05	303
2,2',3,3',4,5'-Hexachlorobiphenyl	0	0.0909982	0.016744	0	0.00452249	7.6e-05	304
2,2',3,3',4,6,6'-Heptachlorobiphenyl.coskf	0	0.0759221	0.015456	0	0.00344287	6.8e-05	305
2,2',3,3',4,6-Hexachlorobiphenyl	0	0.0900273	0.016599	0	0.00431158	7.4e-05	306
2,2',3,3',4,6'-Hexachlorobiphenyl	1e-06	0.0974175	0.017438	0	0.00502752	8e-05	307
2,2',3,3',4-Pentachlorobiphenyl	1e-06	0.111025	0.018162	0	0.00584175	8.5e-05	308
2,2',3,3',5,5',6,6'-Octachlorobiphenyl.coskf	0	0.0614916	0.014009	0	0.00249022	5.9e-05	309
2,2',3,3',5,5',6-Heptachlorobiphenyl.coskf	0	0.077746	0.015743	0	0.00367095	7e-05	310
2,2',3,3',5,5'-Hexachlorobiphenyl	0	0.0911415	0.016781	0	0.00465875	7.7e-05	311
2,2',3,3',5,6,6'-Heptachlorobiphenyl.coskf	0	0.0793151	0.015826	0	0.00371211	7e-05	312
2,2',3,3',5,6-Hexachlorobiphenyl	0	0.0922062	0.016889	0	0.0045228	7.6e-05	313
2,2',3,3',5,6'-Hexachlorobiphenyl	0	0.0967587	0.017349	0	0.00510337	8.1e-05	314
2,2',3,3',5-Pentachlorobiphenyl	1e-06	0.108777	0.017951	0	0.00577396	8.4e-05	315
2,2',3,3',6,6'-Hexachlorobiphenyl	1e-06	0.100227	0.017669	0	0.00532426	8.2e-05	316
2,2',3,3',6-Pentachlorobiphenyl	2e-06	0.117973	0.018864	0	0.00654231	9e-05	317
2,2',3,3'-Tetrachlorobiphenyl	3e-06	0.134785	0.019648	0	0.00761553	9.5e-05	318
2,2,3,3-Tetramethylbutane	6.3e-05	0.0625528	0.008377	5e-06	0.00119785	3.3e-05	319
2,2,3,3-Tetramethylhexane	8e-06	0.0456329	0.007989	0	0.000811979	2.9e-05	320
2,2,3,3-Tetramethylpentane	2.4e-05	0.0513899	0.008019	1e-06	0.000922544	3e-05	321
2,2',3,4,4',5,5',6-Octachlorobiphenyl.coskf	0	0.0627352	0.014256	0	0.00254257	6e-05	322
2,2',3,4,4',5,5'-Heptachlorobiphenyl.coskf	0	0.0752354	0.015461	0	0.00340794	6.8e-05	323
2,2',3,4,4',5,6,6'-Octachlorobiphenyl.coskf	0	0.0578767	0.013424	0	0.00217733	5.5e-05	324
2,2',3,4,4',5,6-Heptachlorobiphenyl	0	0.0741355	0.015258	0	0.00320708	6.5e-05	325
2,2',3,4,4',5,6'-Heptachlorobiphenyl.coskf	0	0.0730261	0.015106	0	0.00328537	6.6e-05	326
2,2',3,4,4',5',6-Heptachlorobiphenyl.coskf	0	0.0766569	0.01561	0	0.003579	6.9e-05	327
2,2',3,4,4',5-Hexachlorobiphenyl	0	0.0883222	0.016407	0	0.00424296	7.3e-05	328
2,2',3,4,4',5'-Hexachlorobiphenyl	0	0.0927616	0.016949	0	0.0046779	7.7e-05	329
2,2',3,4,4',6,6'-Heptachlorobiphenyl.coskf	0	0.0723321	0.01497	0	0.00322979	6.5e-05	330
2,2',3,4,4',6-Hexachlorobiphenyl	0	0.0930375	0.016926	0	0.00469859	7.7e-05	331
2,2',3,4,4',6'-Hexachlorobiphenyl	0	0.0914252	0.016731	0	0.00459679	7.6e-05	332
2,2',3,4,4'-Pentachlorobiphenyl	1e-06	0.111289	0.018183	0	0.0060046	8.5e-05	333
2,2',3,4,5,5',6-Heptachlorobiphenyl	0	0.0768419	0.015624	0	0.003429	6.8e-05	334
2,2',3,4',5,5',6-Heptachlorobiphenyl.coskf	0	0.0796983	0.015994	0	0.00385496	7.2e-05	335
2,2',3,4,5,5'-Hexachlorobiphenyl	0	0.0925241	0.016907	0	0.00462833	7.7e-05	336
2,2',3,4',5,5'-Hexachlorobiphenyl	0	0.0928248	0.016976	0	0.00480927	7.8e-05	337
2,2',3,4,5,6,6'-Heptachlorobiphenyl	0	0.0714638	0.014783	0	0.00291727	6.2e-05	338
2,2',3,4',5,6,6'-Heptachlorobiphenyl.coskf	0	0.0742332	0.015196	0	0.00338937	6.7e-05	339
2,2',3,4,5,6-Hexachlorobiphenyl	1e-06	0.0835372	0.015851	0	0.00359679	6.8e-05	340
2,2',3,4,5,6'-Hexachlorobiphenyl	0	0.089644	0.016492	0	0.00431232	7.4e-05	341
2,2',3,4,5',6-Hexachlorobiphenyl	0	0.09551	0.017226	0	0.00492142	7.9e-05	342
2,2',3,4',5,6-Hexachlorobiphenyl	0	0.0947351	0.01714	0	0.00487361	7.9e-05	343
2,2',3,4',5,6'-Hexachlorobiphenyl	0	0.0912093	0.016707	0	0.00471764	7.7e-05	344
2,2',3,4',5',6-Hexachlorobiphenyl	0	0.0990278	0.017596	0	0.00531407	8.2e-05	345
2,2',3,4,5-Pentachlorobiphenyl	1e-06	0.0998746	0.017033	0	0.00479053	7.7e-05	346
2,2',3,4,5'-Pentachlorobiphenyl	1e-06	0.116093	0.018697	0	0.00647882	8.9e-05	347
2,2',3,4',5-Pentachlorobiphenyl	1e-06	0.112809	0.018327	0	0.00630864	8.7e-05	348
2,2',3,4',5'-Pentachlorobiphenyl	1e-06	0.10977	0.01809	0	0.00587748	8.5e-05	349
2,2',3,4,6,6'-Hexachlorobiphenyl	1e-06	0.0905422	0.016554	0	0.00437732	7.4e-05	350
2,2',3,4',6,6'-Hexachlorobiphenyl	1e-06	0.0948567	0.017046	0	0.00492974	7.9e-05	351
2,2',3,4,6-Pentachlorobiphenyl	1e-06	0.106285	0.017707	0	0.00536227	8.1e-05	352
2,2',3,4,6'-Pentachlorobiphenyl	1e-06	0.113571	0.018402	0	0.00613708	8.6e-05	353
2,2',3,4',6-Pentachlorobiphenyl	1e-06	0.121298	0.01916	0	0.00702747	9.2e-05	354
2,2',3,4',6'-Pentachlorobiphenyl	1e-06	0.110935	0.018108	0	0.0059965	8.5e-05	355
2,2',3,4-Tetrachlorobiphenyl	3e-06	0.129257	0.019169	0	0.00706074	9.1e-05	356
2,2',3,4'-Tetrachlorobiphenyl	3e-06	0.135178	0.019678	0	0.00783906	9.5e-05	357
2,2,3,4-Tetramethylpentane	2e-05	0.0493097	0.007862	1e-06	0.000857206	2.9e-05	358
2,2',3,5,5',6-Hexachlorobiphenyl	0	0.0980941	0.017522	0	0.00518066	8.1e-05	359
2,2',3,5,5'-Pentachlorobiphenyl	1e-06	0.115468	0.018633	0	0.00657921	8.9e-05	360
2,2',3,5,6,6'-Hexachlorobiphenyl	1e-06	0.0925853	0.016769	0	0.00456138	7.6e-05	361
2,2',3,5,6-Pentachlorobiphenyl	1e-06	0.109002	0.017997	0	0.00563481	8.4e-05	362
2,2',3,5,6'-Pentachlorobiphenyl	1e-06	0.112608	0.018273	0	0.00620587	8.6e-05	363
2,2',3,5',6-Pentachlorobiphenyl	1e-06	0.125745	0.019582	0	0.00748387	9.6e-05	364
2,2',3,5-Tetrachlorobiphenyl	2e-06	0.127371	0.018973	0	0.00704847	9.1e-05	365
2,2',3,5'-Tetrachlorobiphenyl	3e-06	0.140201	0.020174	0	0.00834434	9.9e-05	366
2,2',3,6,6'-Pentachlorobiphenyl	2e-06	0.120097	0.018966	0	0.00675745	9.1e-05	367
2,2',3,6-Tetrachlorobiphenyl	4e-06	0.141496	0.020327	0	0.00825283	9.9e-05	368
2,2',3,6'-Tetrachlorobiphenyl	4e-06	0.141592	0.020235	0	0.00828959	9.8e-05	369
2,2',3-Trichlorobiphenyl	7e-06	0.158563	0.021002	0	0.00928269	0.000103	370
2,2,3-Trimethylbutane	9.6e-05	0.0646234	0.007964	8e-06	0.00115398	3.1e-05	371
2,2,3-Trimethylhexane	1.1e-05	0.0480433	0.007801	1e-06	0.000831637	2.8e-05	372
2,2,3-Trimethylpentane	3.4e-05	0.0550369	0.007868	2e-06	0.000969161	3e-05	373
2,2',4,4',5,5'-Hexachlorobiphenyl	0	0.0939888	0.017121	0	0.00490433	7.9e-05	374
2,2',4,4',5,6'-Hexachlorobiphenyl	0	0.0928832	0.016906	0	0.00488256	7.9e-05	375
2,2',4,4',5-Pentachlorobiphenyl	1e-06	0.111468	0.018236	0	0.00618016	8.7e-05	376
2,2'4,4'6,6'-Hexachlorobiphenyl	0	0.0878403	0.016291	0	0.0044446	7.5e-05	377
2,2,4,4,6,8,8-Heptamethylnonane	0	0.0286009	0.008186	0	0.000502708	2.7e-05	378
2,2',4,4',6-Pentachlorobiphenyl	1e-06	0.11391	0.018385	0	0.00645113	8.8e-05	379
2,2',4,4'-Tetrachlorobiphenyl	2e-06	0.137997	0.019874	0	0.00828999	9.7e-05	380
2,2,4,4-Tetramethyl-1,3-cyclobutanediol.coskf	0.005807	1.75825	0.419733	0.001587	1.39436	0.328173	381
2,2,4,4-Tetramethylpentane	2e-05	0.0523303	0.008194	1e-06	0.000964795	3.1e-05	382
2,2',4,5,5'-Pentachlorobiphenyl	1e-06	0.117055	0.018823	0	0.00672151	9.1e-05	383
2,2',4,5,6'-Pentachlorobiphenyl	1e-06	0.116065	0.018604	0	0.00654745	8.9e-05	384
2,2',4,5',6-Pentachlorobiphenyl	1e-06	0.117397	0.018766	0	0.00681973	9.1e-05	385
2,2',4,5-Tetrachlorobiphenyl	2e-06	0.128022	0.019088	0	0.00711413	9.1e-05	386
2,2',4,5'-Tetrachlorobiphenyl	2e-06	0.142976	0.020407	0	0.00879658	0.000101	387
2,2',4,6,6'-Pentachlorobiphenyl	1e-06	0.110912	0.018074	0	0.00605015	8.5e-05	388
2,2',4,6-Tetrachlorobiphenyl	3e-06	0.132868	0.019446	0	0.00757159	9.4e-05	389
2,2',4,6'-Tetrachlorobiphenyl	4e-06	0.145209	0.020561	0	0.00886897	0.000101	390
2,2',4-Trichlorobiphenyl	6e-06	0.161764	0.021223	0	0.0098002	0.000105	391
2,2,4-Trimethyl-1,3-pentanediol	0.002894	1.51024	0.341953	0.001017	1.17222	0.309959	392
2,2,4-Trimethyl-1,3-pentanediol_diisobutyrate.coskf	4e-06	0.331136	0.118442	1e-06	0.288639	0.077764	393
2,2,4-Trimethylhexane	1.1e-05	0.0465722	0.007692	1e-06	0.000787211	2.8e-05	394
2,2,4-Trimethylpentane	3.2e-05	0.0548781	0.007873	2e-06	0.000962297	3e-05	395
2,2',5,5'-Tetrachlorobiphenyl	3e-06	0.14925	0.021092	0	0.00943985	0.000105	396
2,2,5,5-Tetramethylhexane	5e-06	0.0450311	0.008034	0	0.000804963	2.9e-05	397
2,2',5,6'-Tetrachlorobiphenyl	4e-06	0.14787	0.020874	0	0.00918083	0.000103	398
2,2',5-Trichlorobiphenyl	7e-06	0.168213	0.021864	0	0.0104401	0.000108	399
2,2,5-Trimethylhexane	9e-06	0.0475023	0.007783	0	0.000817815	2.8e-05	400
2,2',6,6'-Tetrachlorobiphenyl	5e-06	0.142092	0.020272	0	0.00840042	9.9e-05	401
2,2',6-Trichlorobiphenyl	1.1e-05	0.174144	0.022401	0	0.010788	0.000111	402
2-2-Butoxyethoxy-ethanol	0.000683	1.35669	0.31454	0.000454	1.26865	0.366708	403
2,2-Dichloro-1,1,1-trifluoroethane	0.001258	0.616574	0.028966	0.000184	0.0794908	0.000193	404
2,2-Dichloro-1,1,2-trifluoroethane	0.001461	0.623848	0.029644	0.000215	0.0713705	0.000188	405
2,2'-Dichlorobiphenyl	2.1e-05	0.198418	0.023375	1e-06	0.0123023	0.000116	406
2,2-Dimethyl-1-propanol	0.008794	1.8187	0.313957	0.004246	1.38694	0.307828	407
2,2-Dimethyl-3-ethylpentane	1.5e-05	0.0476007	0.007733	1e-06	0.000809243	2.8e-05	408
2,2-Dimethylbutane	0.00018	0.0719114	0.007811	1.9e-05	0.00125126	3.1e-05	409
2,2-Dimethylheptane	6e-06	0.0449931	0.007571	0	0.000745647	2.7e-05	410
2,2-Dimethylhexane	1.8e-05	0.0510128	0.0076	1e-06	0.000854008	2.8e-05	411
2,2-Dimethyloctane	2e-06	0.0401481	0.007554	0	0.000659107	2.6e-05	412
2,2-Dimethylpentane	5.7e-05	0.0599249	0.007692	4e-06	0.00102041	2.9e-05	413
2,2-Dimethylpropane	0.000453	0.08958	0.008048	6e-05	0.00162726	3.4e-05	414
2,2-Diphenyl_propane	1.4e-05	0.175713	0.023806	0	0.00987479	0.000118	415
2-2-Ethoxyethoxy-ethanol	0.006001	2.04031	0.440486	0.006426	1.98194	0.548158	416
2-2-Hexoxyethoxy-ethanol	8.2e-05	0.877811	0.239542	3.3e-05	0.743923	0.254884	417
2,2'-Iminobis-acetonitrile.coskf	miscible	#VALUE!	#VALUE!	0.031018	2.6688	0.365694	418
2-2-Methoxyethoxy-ethanol	0.020623	2.25892	0.581351	0.036393	1.74458	0.76232	419
2-(2-Pentoxyethoxy)ethanol	0.000215	1.16941	0.286474	0.000295	1.66921	0.522455	420
2,3,3,3-Tetrafluoropropene	0.00179	0.379969	0.018744	0.0003	0.0233908	0.000102	421
2,3,3',4,4',5,5',6-Octachlorobiphenyl.coskf	0	0.0608876	0.013992	0	0.00235574	5.7e-05	422
2,3,3',4,4',5,5'-Heptachlorobiphenyl.coskf	0	0.0673553	0.014328	0	0.00272493	6e-05	423
2,3,3',4,4',5,6-Heptachlorobiphenyl	0	0.0751815	0.015449	0	0.00325135	6.6e-05	424
2,3,3',4,4',5',6-Heptachlorobiphenyl.coskf	0	0.0745305	0.015341	0	0.00335529	6.7e-05	425
2,3,3',4,4',5-Hexachlorobiphenyl	0	0.081404	0.015542	0	0.00360399	6.8e-05	426
2,3,3',4,4',5'-Hexachlorobiphenyl	0	0.081609	0.015538	0	0.00365057	6.8e-05	427
2,3,3',4,4',6-Hexachlorobiphenyl	0	0.0929812	0.016948	0	0.0046423	7.7e-05	428
2,3,3',4,4'-Pentachlorobiphenyl	1e-06	0.0999006	0.016945	0	0.0049035	7.7e-05	429
2,3,3',4,5,5',6-Heptachlorobiphenyl	0	0.0730779	0.015138	0	0.00315909	6.5e-05	430
2,3,3',4',5,5',6-Heptachlorobiphenyl.coskf	0	0.0771955	0.015719	0	0.00359057	7e-05	431
2,3,3',4,5,5'-Hexachlorobiphenyl	0	0.0811759	0.015503	0	0.00366806	6.8e-05	432
2,3,3',4',5,5'-Hexachlorobiphenyl	0	0.0832954	0.015762	0	0.0038821	7e-05	433
2,3,3',4,5,6-Hexachlorobiphenyl	0	0.0868924	0.016256	0	0.0038997	7.1e-05	434
2,3,3',4,5',6-Hexachlorobiphenyl	0	0.0916997	0.016739	0	0.00462822	7.6e-05	435
2,3,3',4',5,6-Hexachlorobiphenyl	0	0.0955015	0.017281	0	0.004882	7.9e-05	436
2,3,3',4',5',6-Hexachlorobiphenyl	0	0.0948938	0.017149	0	0.00488529	7.9e-05	437
2,3,3',4,5-Pentachlorobiphenyl	1e-06	0.093878	0.016296	0	0.00431357	7.2e-05	438
2,3,3',4,5'-Pentachlorobiphenyl	1e-06	0.0994006	0.016865	0	0.00496441	7.7e-05	439
2,3,3',4',5-Pentachlorobiphenyl	1e-06	0.101924	0.017165	0	0.00519522	7.9e-05	440
2,3,3',4',5'-Pentachlorobiphenyl	1e-06	0.0969558	0.016592	0	0.00463718	7.5e-05	441
2,3,3',4,6-Pentachlorobiphenyl	1e-06	0.106661	0.017759	0	0.00546178	8.2e-05	442
2,3,3',4',6-Pentachlorobiphenyl	1e-06	0.120045	0.01909	0	0.00685752	9.2e-05	443
2,3,3',4-Tetrachlorobiphenyl	2e-06	0.118122	0.017995	0	0.00609213	8.4e-05	444
2,3,3',4'-Tetrachlorobiphenyl	2e-06	0.120885	0.018248	0	0.00638383	8.6e-05	445
2,3,3,4-Tetramethylpentane	2.2e-05	0.0492695	0.007855	1e-06	0.000854173	2.9e-05	446
2,3,3',5,5',6-Hexachlorobiphenyl	0	0.0940953	0.01705	0	0.00486353	7.9e-05	447
2,3,3',5,5'-Pentachlorobiphenyl	0	0.101478	0.017102	0	0.00527668	7.9e-05	448
2,3,3',5,6-Pentachlorobiphenyl	1e-06	0.111038	0.018229	0	0.00587568	8.5e-05	449
2,3,3',5',6-Pentachlorobiphenyl	1e-06	0.117331	0.018723	0	0.00673062	9e-05	450
2,3,3',5-Tetrachlorobiphenyl	2e-06	0.118672	0.018046	0	0.00628314	8.5e-05	451
2,3,3',5'-Tetrachlorobiphenyl	2e-06	0.119783	0.018107	0	0.00641446	8.5e-05	452
2,3,3',6-Tetrachlorobiphenyl	3e-06	0.141229	0.020279	0	0.00834398	9.9e-05	453
2,3,3'-Trichlorobiphenyl	5e-06	0.144848	0.019486	0	0.00805078	9.4e-05	454
2,3,3-Trimethyl-1-butene	0.0002	0.129161	0.012798	2e-05	0.00401748	5.9e-05	455
2,3,3-Trimethylpentane	3.7e-05	0.0538054	0.007729	2e-06	0.000920301	2.9e-05	456
2,3',4,4',5,5'-Hexachlorobiphenyl	0	0.0824531	0.015624	0	0.00380814	6.9e-05	457
2,3,4,4',5,6-Hexachlorobiphenyl	0	0.0900169	0.016616	0	0.00416095	7.3e-05	458
2,3',4,4',5',6-Hexachlorobiphenyl	0	0.0882667	0.016384	0	0.00439196	7.4e-05	459
2,3,4,4',5-Pentachlorobiphenyl	1e-06	0.0982157	0.016744	0	0.00468138	7.5e-05	460
2,3',4,4',5-Pentachlorobiphenyl	1e-06	0.100191	0.016949	0	0.00504001	7.8e-05	461
2,3',4,4',5'-Pentachlorobiphenyl	1e-06	0.0972505	0.016567	0	0.00476769	7.5e-05	462
2,3,4,4',6-Pentachlorobiphenyl	1e-06	0.110016	0.018132	0	0.00578099	8.4e-05	463
2,3',4,4',6-Pentachlorobiphenyl	1e-06	0.112335	0.018257	0	0.00624836	8.7e-05	464
2,3,4,4'-Tetrachlorobiphenyl	2e-06	0.123216	0.018463	0	0.00656327	8.7e-05	465
2,3',4,4'-Tetrachlorobiphenyl	2e-06	0.121072	0.018193	0	0.00654302	8.6e-05	466
2,3',4,5,5'-Pentachlorobiphenyl	0	0.100482	0.016955	0	0.00518608	7.8e-05	467
2,3',4',5,5'-Pentachlorobiphenyl	1e-06	0.101929	0.017095	0	0.00518733	7.9e-05	468
2,3,4,5,6-Pentachlorobiphenyl	1e-06	0.0928718	0.016402	0	0.00400281	7.1e-05	469
2,3,4',5,6-Pentachlorobiphenyl	1e-06	0.114151	0.018579	0	0.00618402	8.8e-05	470
2,3',4,5',6-Pentachlorobiphenyl	1e-06	0.108794	0.017871	0	0.0060526	8.5e-05	471
2,3',4',5',6-Pentachlorobiphenyl	1e-06	0.105479	0.01757	0	0.00550952	8.1e-05	472
2,3,4,5-Tetrachlorobiphenyl	2e-06	0.103672	0.01664	0	0.0046711	7.4e-05	473
2,3,4',5-Tetrachlorobiphenyl	2e-06	0.123861	0.018515	0	0.0067662	8.8e-05	474
2,3',4,5-Tetrachlorobiphenyl	2e-06	0.11797	0.017939	0	0.00620259	8.4e-05	475
2,3',4,5'-Tetrachlorobiphenyl	1e-06	0.120041	0.018067	0	0.00659168	8.6e-05	476
2,3',4',5-Tetrachlorobiphenyl	2e-06	0.126256	0.018716	0	0.00703221	8.9e-05	477
2,3',4',5'-Tetrachlorobiphenyl	2e-06	0.109661	0.017087	0	0.00533518	7.8e-05	478
2,3,4,6-Tetrachlorobiphenyl	3e-06	0.118642	0.018337	0	0.00597383	8.6e-05	479
2,3,4',6-Tetrachlorobiphenyl	3e-06	0.146819	0.020863	0	0.00891594	0.000103	480
2,3',4,6-Tetrachlorobiphenyl	2e-06	0.132361	0.019368	0	0.00764022	9.4e-05	481
2,3',4',6-Tetrachlorobiphenyl	3e-06	0.141606	0.020214	0	0.00846697	9.9e-05	482
2,3,4-Trichlorobiphenyl	5e-06	0.133801	0.018661	0	0.00685371	8.8e-05	483
2,3,4'-Trichlorobiphenyl	6e-06	0.151882	0.020066	0	0.00872712	9.8e-05	484
2,3',4-Trichlorobiphenyl	4e-06	0.145273	0.019435	0	0.00825796	9.4e-05	485
2,3',4'-Trichlorobiphenyl	5e-06	0.140123	0.019033	0	0.0076127	9.1e-05	486
2,3,4-Trimethylpentane	3.2e-05	0.0526907	0.007677	2e-06	0.00089303	2.9e-05	487
2,3',5,5'-Tetrachlorobiphenyl	1e-06	0.126136	0.018661	0	0.00718206	9e-05	488
2,3,5,6-Tetrachlorobiphenyl	3e-06	0.123513	0.01879	0	0.00640821	8.9e-05	489
2,3',5',6-Tetrachlorobiphenyl	2e-06	0.13549	0.019564	0	0.00804459	9.5e-05	490
2,3,5-Trichlorobiphenyl	4e-06	0.133116	0.018564	0	0.00694269	8.8e-05	491
2,3',5-Trichlorobiphenyl	5e-06	0.151193	0.019962	0	0.00884688	9.8e-05	492
2,3',5'-Trichlorobiphenyl	4e-06	0.137274	0.01875	0	0.00750829	8.9e-05	493
2,3,5-Trimethylthiophene	0.000197	0.217495	0.019283	1.7e-05	0.0102052	9.6e-05	494
2,3,6-Trichlorobiphenyl	8e-06	0.159574	0.021294	0	0.00928541	0.000105	495
2,3',6-Trichlorobiphenyl	8e-06	0.171428	0.022069	0	0.0107052	0.000109	496
2,3-Butanediol.coskf	miscible	#VALUE!	#VALUE!	miscible	#VALUE!	#VALUE!	497
2,3-Butanedione	0.049709	2.27362	0.352337	0.019203	1.54393	0.057005	498
2,3-Dichloro-1-propanol	0.020623	2.7339	0.343127	0.006077	3.49111	0.157147	499
2,3-Dichlorobiphenyl	1.5e-05	0.169214	0.020699	1e-06	0.00943137	0.000101	500
2,3'-Dichlorobiphenyl	1.3e-05	0.17249	0.020737	0	0.00993519	0.000101	501
2,3-Dichlorobutane	0.000864	0.390683	0.026512	9.6e-05	0.0236786	0.000138	502
2,3-Dichloropropene	0.002313	0.61357	0.030079	0.000329	0.0476136	0.000164	503
2,3-Dihydrofuran	0.019266	1.75812	0.134832	0.007223	0.821187	0.018382	504
2,3-Dimethyl-1,3-butadiene	0.000719	0.244261	0.017403	9e-05	0.0102627	8.5e-05	505
2,3-Dimethyl-1-butene	0.00037	0.15621	0.013311	4.4e-05	0.00502037	6.2e-05	506
2,3-Dimethyl-1-hexene	4.5e-05	0.0987218	0.011751	3e-06	0.00286293	5.2e-05	507
2,3-Dimethyl-2,3-diphenylbutane	2e-06	0.105532	0.019005	0	0.00491853	8.8e-05	508
2,3-Dimethyl-2-butene	0.000328	0.143561	0.012152	3.8e-05	0.00433019	5.6e-05	509
2,3-Dimethylbenzothiophene	8.8e-05	0.227674	0.022898	5e-06	0.0126792	0.000115	510
2,3-Dimethylbutane	0.000161	0.0692414	0.007644	1.6e-05	0.00117151	3e-05	511
2,3-Dimethyldecane	0	0.032516	0.007484	0	0.00051971	2.4e-05	512
2,3-Dimethyldodecane	0	0.0277671	0.007501	0	0.000437021	2.3e-05	513
2,3-Dimethylheptane	6e-06	0.0446602	0.007524	0	0.000737649	2.7e-05	514
2,3-Dimethylhexane	1.8e-05	0.0493418	0.007435	1e-06	0.000801344	2.7e-05	515
2,3-Dimethylnonane	1e-06	0.0359708	0.007509	0	0.000583397	2.5e-05	516
2,3-Dimethyloctane	2e-06	0.0387477	0.007366	0	0.000614178	2.5e-05	517
2,3-Dimethylpentane	5.7e-05	0.0583344	0.007569	4e-06	0.000976131	2.9e-05	518
2,3-Dimethylthiophene	0.00072	0.341129	0.024153	8.1e-05	0.0193108	0.000125	519
2,3-Dimethylundecane	0	0.0289594	0.007354	0	0.000446081	2.3e-05	520
2,3-Epoxy-1-propanol.coskf	miscible	#VALUE!	#VALUE!	miscible	#VALUE!	#VALUE!	521
2,3-Pentadiene	0.001185	0.302228	0.017871	0.00017	0.013112	8.9e-05	522
2,3-Xylenol	0.00249	1.9011	0.168322	0.000561	6.96168	0.115476	523
2,4,4',5-Tetrachlorobiphenyl	2e-06	0.122519	0.018375	0	0.00664451	8.7e-05	524
2,4,4',6-Tetrachlorobiphenyl	2e-06	0.130491	0.019222	0	0.00747937	9.3e-05	525
2,4,4'-Trichlorobiphenyl	5e-06	0.151162	0.019926	0	0.00884855	9.7e-05	526
2,4,4-Trimethyl-1-pentene	7.3e-05	0.0938547	0.011127	5e-06	0.00255102	4.9e-05	527
2,4,4-Trimethyl-2-pentene	5.6e-05	0.0918077	0.010904	4e-06	0.00247412	4.7e-05	528
2,4,4-Trimethylhexane	1.3e-05	0.0473632	0.007726	1e-06	0.000806325	2.8e-05	529
2,4,5-Trichlorobiphenyl	4e-06	0.132788	0.018531	0	0.00691113	8.8e-05	530
2,4',5-Trichlorobiphenyl	5e-06	0.157136	0.020538	0	0.0094509	0.000101	531
2,4,6-Trichlorobiphenyl	6e-06	0.148576	0.020114	0	0.00840561	9.9e-05	532
2,4',6-Trichlorobiphenyl	7e-06	0.170955	0.02213	0	0.0107145	0.00011	533
2,4,6-Triiodophenol	3.4e-05	0.397928	0.045379	3e-06	2.62724	0.020205	534
2,4,6-Trimethylpyridine	0.000951	1.50031	0.297638	0.000398	1.8867	0.420471	535
2,4,6-Trinitrophenol	0.00199	1.59004	0.174786	0.000111	1.40424	0.021505	536
2,4,6-Trinitrotoluene	0.000911	1.08515	0.12186	3.8e-05	0.207025	0.002567	537
2,4-Diaminotoluene	0.018204	4.02724	0.386008	0.007225	38.6292	0.175059	538
2,4-Dichlorobenzotrifluoride	5.4e-05	0.178304	0.017748	3e-06	0.00981407	8.9e-05	539
2,4-Dichlorobiphenyl	1.2e-05	0.168501	0.020518	0	0.00959138	0.000101	540
2,4'-Dichlorobiphenyl	1.4e-05	0.180393	0.021447	0	0.0107171	0.000105	541
2,4-Dichlorotoluene	0.000113	0.183896	0.01684	9e-06	0.00865392	8.1e-05	542
2,4-Dimethyl-1,3-dioxolane-2-methanol.coskf	0.012703	2.13799	0.421174	0.017106	2.14953	0.546647	543
2,4-Dimethyl-3-ethylpentane	1.3e-05	0.0467847	0.007658	1e-06	0.000787093	2.8e-05	544
2,4-Dimethylaniline	0.002543	1.79188	0.173222	0.000487	3.85185	0.074298	545
2,4-Dimethylhexane	1.7e-05	0.0480846	0.007325	1e-06	0.000761242	2.6e-05	546
2,4-Dimethyloctane	2e-06	0.0396167	0.007478	0	0.000642176	2.6e-05	547
2,4-Dimethylpentane	5e-05	0.0563439	0.007433	4e-06	0.000913486	2.8e-05	548
2,4-Dinitrophenol	0.028011	3.131	0.690779	0.007598	15.0365	0.628397	549
2,4-Dinitrotoluene	0.001374	1.06692	0.115294	0.000143	0.279327	0.005386	550
2,4-Diphenyl-4-methyl-1-pentene	2e-06	0.130287	0.022234	0	0.00701074	0.000106	551
2,4-Pentanediol.coskf	miscible	#VALUE!	#VALUE!	miscible	#VALUE!	#VALUE!	552
2,4-Toluene_diisocyanate	6.2e-05	0.277657	0.026651	3e-06	0.0185136	0.000142	553
2,4-Xylenol	0.001876	1.77298	0.157928	0.000421	5.67887	0.101124	554
2,5-Dichlorobiphenyl	1.3e-05	0.17478	0.021108	0	0.0101842	0.000104	555
2,5-Dihydrofuran	0.04699	2.48121	0.419734	0.050336	2.3289	0.622698	556
2,5-Dimethyl-1,5-hexadiene	0.00011	0.191984	0.01857	8e-06	0.00863326	9.2e-05	557
2,5-Dimethyl-2,4-hexadiene	8.7e-05	0.169588	0.016814	6e-06	0.00702262	8.1e-05	558
2,5-Dimethylhexane	1.4e-05	0.0491283	0.007444	1e-06	0.000799162	2.7e-05	559
2,5-Dimethyloctane	2e-06	0.0385318	0.007381	0	0.000612336	2.5e-05	560
2,5-Dimethylthiophene	0.000582	0.319265	0.023265	6.3e-05	0.0171883	0.00012	561
2,5-Dinitrotoluene	0.001262	1.03267	0.108546	0.000123	0.255465	0.004528	562
2,5-Xylenol	0.002979	3.40638	0.274457	0.000902	28.3742	0.291557	563
2,6,8-Trimethyl-4-nonanone	1.4e-05	0.361962	0.098992	3e-06	0.386432	0.112149	564
2,6-Diaminotoluene	0.024808	2.77406	0.498574	0.007576	8.70665	0.327833	565
2,6-Dichlorobiphenyl	2.1e-05	0.197079	0.023446	1e-06	0.0121241	0.000117	566
2,6-Diethylaniline	0.000245	0.748805	0.093346	3.1e-05	1.00749	0.037123	567
2,6-Diethylnaphthalene	6e-06	0.135086	0.018688	0	0.00635786	8.7e-05	568
2,6-Dimethyl-4-heptanol	5.2e-05	0.382198	0.085446	9e-06	0.317101	0.096962	569
2,6-Dimethylheptane	5e-06	0.043414	0.00742	0	0.000699702	2.6e-05	570
2,6-Dimethylnaphthalene	3.7e-05	0.17425	0.019244	2e-06	0.00849769	9.2e-05	571
2,6-Dimethyloctane	2e-06	0.0391324	0.007436	0	0.000629035	2.5e-05	572
2,6-Dimethylpyridine	0.002333	1.72335	0.282673	0.001099	2.25102	0.399716	573
2,6-Dinitrophenol	0.003576	1.53156	0.152452	0.000316	0.846401	0.012697	574
2,6-Dinitrotoluene	0.001586	1.12705	0.118478	0.000147	0.284311	0.004858	575
2,6-Di-tert-butyl-p-cresol	1e-06	0.157443	0.028753	0	2.18919	0.025263	576
2,6-Naphthalenedicarboxylic_acid	0.007675	2.82457	0.595313	0.002961	7.1679	0.577214	577
2,6-Pyridinedimethanol	0.045359	1.86951	0.719882	0.016265	2.78174	0.553661	578
2,6-Toluene_diisocyanate	6.6e-05	0.26635	0.025948	3e-06	0.0171067	0.000137	579
2,6-Xylenol	0.001839	1.88321	0.154464	0.000433	9.88956	0.117763	580
2,7-Dichlorodibenzo-p-dioxin	8e-06	0.180787	0.022005	0	0.0117073	0.000112	581
2,7-Dimethylbenzothiophene	8.6e-05	0.236358	0.023641	5e-06	0.0134728	0.000119	582
2,7-Dimethylnaphthalene	3.8e-05	0.175361	0.019353	2e-06	0.00858859	9.3e-05	583
2,7-Dimethyloctane	2e-06	0.0390323	0.007442	0	0.000627297	2.5e-05	584
2-Acetoacetoxy-ethyl_methacrylate	0.000604	1.2402	0.230151	0.000211	0.760016	0.054557	585
2-Acetyl-1-naphthol	0.000152	0.489646	0.065262	1.7e-05	0.20462	0.008245	586
2-(alpha-Methylbenzyloxy)-1-propanol.coskf	0.000471	1.12533	0.23291	0.000209	1.40948	0.299576	587
2-Amino-2-methyl-1-propanol	0.055526	1.9763	0.669066	miscible	#VALUE!	#VALUE!	588
2-Amino-3,5-dichloropyridine	0.003398	2.33147	0.222928	0.000835	8.25287	0.125952	589
2-Amino-3-hydroxypyridine.coskf	miscible	#VALUE!	#VALUE!	0.046162	5.05884	0.566632	590
2-Amino-4,6-dimethylpyridine	0.006463	2.29838	0.377353	0.002251	3.60844	0.35725	591
2-Amino-4-methyl-3-nitropyridine	0.009617	2.31386	0.382962	0.00367	2.72418	0.24651	592
2-Amino-4-methylpyridine	0.021675	2.60934	0.504784	0.00891	4.41723	0.436171	593
2-Amino-5-chloropyridine	0.017509	3.091	0.407189	0.005951	8.33576	0.253309	594
2-Amino-5-nitropyridine.coskf	miscible	#VALUE!	#VALUE!	0.023152	7.04417	0.508568	595
2-Aminoethoxyethanol.coskf	miscible	#VALUE!	#VALUE!	miscible	#VALUE!	#VALUE!	596
2-Aminopyridine	0.096666	1.73539	0.685087	0.029011	4.77317	0.501115	597
2-Bromobutane	0.00102	0.335423	0.022363	0.000131	0.0170479	0.000116	598
2-Bromopropane	0.003853	0.577781	0.030425	0.000589	0.0358325	0.000161	599
2-Butanol	0.01644	2.16047	0.361749	0.007491	1.71303	0.327634	600
2-Butanone	0.049957	2.40659	0.502256	miscible	#VALUE!	#VALUE!	601
2-Buten-1-ol,_acetate	0.002373	1.37705	0.161788	0.001015	1.00232	0.059463	602
2-Butoxime	0.024571	2.47597	0.443524	0.010323	2.72014	0.308051	603
2-Butoxyethanol	0.003862	1.76784	0.352957	0.001914	1.49431	0.386684	604
2-Butyl-1-decanol	0	0.222216	0.078737	0	0.104953	0.04234	605
2-Butyl-2-ethyl-1,3-propanediol	0.000664	1.10177	0.30009	0.000266	0.93093	0.358927	606
2-Butylbenzothiophene	8e-06	0.142795	0.01886	0	0.00695879	8.9e-05	607
2-Butyl-nonan-1-ol	1e-06	0.287744	0.102744	0	0.153833	0.084249	608
2-Butyl-octan-1-ol	3e-06	0.315539	0.100571	0	0.157775	0.064696	609
2-Butyne-1,4-diol.coskf	miscible	#VALUE!	#VALUE!	miscible	#VALUE!	#VALUE!	610
2-Butyne	0.00813	0.950513	0.04301	0.00143	0.0701371	0.00023	611
2-Chloro-1,1,1,2-tetrafluoroethane	0.002369	0.850648	0.033596	0.000391	0.12811	0.000227	612
2-Chloro-1,1,1-trifluoroethane	0.005826	1.23042	0.045336	0.000981	0.164035	0.000263	613
2-Chloro-1,1-difluoroethylene	0.004069	0.492471	0.020259	0.000759	0.0352889	0.000118	614
2-Chloro-1,3-propanediol.coskf	miscible	#VALUE!	#VALUE!	miscible	#VALUE!	#VALUE!	615
2-Chlorobiphenyl	3.6e-05	0.205716	0.022507	2e-06	0.0119479	0.000111	616
2-Chlorodibenzo-p-dioxin	2.2e-05	0.207476	0.023134	1e-06	0.0133879	0.000121	617
2-Chloroethanol.coskf	miscible	#VALUE!	#VALUE!	0.085525	3.50204	0.548376	618
2-Chloropentane	0.000395	0.247982	0.019214	4.3e-05	0.0113926	9.8e-05	619
2-Chlorophenoxyacetic_acid	0.004643	3.41995	0.411711	0.001058	15.4804	0.38403	620
2-Chloropropane	0.004581	0.597119	0.029967	0.000741	0.036699	0.000159	621
2-Chloropropene	0.004723	0.540841	0.024926	0.000815	0.0318247	0.000128	622
2-Cyclohexene-1-one	0.049647	2.1646	0.633502	miscible	#VALUE!	#VALUE!	623
2-Cyclohexenyl_cyclohexanone	0.000124	0.638666	0.141035	4.6e-05	0.800098	0.179007	624
2-Cyclohexyl_cyclohexanone	6e-05	0.433376	0.106129	1.9e-05	0.44994	0.115796	625
2-Difluoromethoxy-1,1,1-trifluoroethane.coskf	0.002486	1.34804	0.055367	0.000309	0.214898	0.000343	626
2-Ethoxyethanol	0.04299	2.08534	0.621922	0.042026	1.77146	0.72131	627
2-Ethoxyethyl_acetate	0.002491	1.59774	0.228895	0.002227	1.64285	0.167952	628
2-Ethyl-1-butanol	0.002663	1.32055	0.239785	0.000789	0.818378	0.198493	629
2-Ethyl-1-butene	0.000321	0.143753	0.012645	3.7e-05	0.00439161	5.9e-05	630
2-Ethyl-1-hexanol	0.000388	0.856219	0.204546	8.8e-05	0.496536	0.186299	631
2-Ethyl-1-hexene	3.5e-05	0.0911362	0.011178	2e-06	0.00250275	4.9e-05	632
2-Ethyl-1-pentene	9.3e-05	0.111971	0.011717	8e-06	0.00322499	5.3e-05	633
2-Ethyl-2-hexenal	0.000585	0.965004	0.162351	0.000314	1.05003	0.158657	634
2-Ethylbenzothiophene	7.3e-05	0.22517	0.022606	4e-06	0.0126588	0.000113	635
2-Ethyl_butyric_acid	0.004574	2.19061	0.308257	0.001532	3.72211	0.273332	636
2-Ethylhexanal	0.000262	0.624519	0.100661	8.1e-05	0.43906	0.045646	637
2-Ethyl_hexanoic_acid	0.000487	1.33304	0.216973	0.00012	2.07746	0.187035	638
2-Ethylhexyl_acetate	2.5e-05	0.39564	0.084403	5e-06	0.255221	0.034965	639
2-Ethylhexyl_acrylate	1.2e-05	0.329736	0.074057	2e-06	0.191459	0.026002	640
2-Ethylhexyl_benzoate	1e-06	0.195433	0.048149	0	0.066277	0.006567	641
2-Ethyl-m-xylene	7.1e-05	0.157407	0.017317	5e-06	0.00663492	8.2e-05	642
2-Ethylnaphthalene	4.3e-05	0.177846	0.019405	2e-06	0.00876232	9.4e-05	643
2-Ethyloxirane	0.018791	2.20627	0.257743	0.015853	2.36835	0.248966	644
2-Ethyl-p-xylene	5.1e-05	0.143056	0.01623	3e-06	0.00568003	7.5e-05	645
2-Ethyl-tetrahydrothiophene	0.000358	0.293899	0.026084	3.7e-05	0.0170375	0.000152	646
2-Ethylthiophene	0.000617	0.328673	0.023412	6.7e-05	0.0184784	0.000121	647
2-Formyl_benzoic_acid	0.00957	2.79651	0.431363	0.004052	6.22813	0.36921	648
2-Heptanol	0.000574	0.950533	0.19875	0.000146	0.617031	0.19684	649
2-Heptanone	0.001123	1.23202	0.190667	0.000698	1.5166	0.233858	650
2-Hexanol	0.001553	1.22572	0.217617	0.000469	0.808774	0.198525	651
2-Hexanone	0.00383	1.70381	0.246765	0.003228	2.1512	0.33491	652
2-Hexoxyethanol	0.000383	1.07839	0.248932	0.000142	0.800947	0.254955	653
2-Hexyne	0.000606	0.35304	0.024482	6.8e-05	0.0193212	0.000132	654
2-Hydroxy-5-nitropyridine.coskf	miscible	#VALUE!	#VALUE!	miscible	#VALUE!	#VALUE!	655
2-Hydroxy-6-methylnicotinic_acid	0.009342	2.46353	0.440394	0.002746	3.77958	0.278356	656
2-Hydroxyacetophenone	0.001917	1.07396	0.114498	0.000463	0.516501	0.017545	657
2-Hydroxycaproic_acid	0.005541	2.69552	0.39985	0.001651	5.60298	0.334886	658
2-Hydroxyethyl_acrylate	0.048222	2.05965	0.64635	0.029535	2.53339	0.528	659
2-Hydroxyethyl_methacrylate	0.014113	2.32149	0.487649	0.008779	2.3871	0.411646	660
2-Hydroxynicotinic_acid.coskf	miscible	#VALUE!	#VALUE!	0.063286	2.17883	0.779738	661
2-Hydroxypropyl_acrylate	0.01267	2.31533	0.462717	0.014154	2.40569	0.51581	662
2-Hydroxypropyl_methacrylate	0.006864	2.07739	0.437659	0.005155	2.05532	0.413374	663
2-Hydroxypyridine	0.034756	2.88832	0.436945	0.010981	5.88543	0.244362	664
2-Mercaptobenzothiazole	0.000555	0.808379	0.090808	0.0001	0.905939	0.058191	665
2-Mercaptoethanol.coskf	miscible	#VALUE!	#VALUE!	0.078302	2.78999	0.551596	666
2-Methacrylamide.coskf	miscible	#VALUE!	#VALUE!	miscible	#VALUE!	#VALUE!	667
2-Methoxy-2-methylpropane	0.003285	1.28206	0.193482	0.001947	1.60943	0.361077	668
2-Methoxy-5-nitropyridine	0.00267	1.3356	0.143024	0.000553	0.793674	0.028058	669
2-Methoxyethanol_acetate	0.017791	2.43447	0.431772	0.044214	2.25221	0.543762	670
2-Methoxyethanol.coskf	miscible	#VALUE!	#VALUE!	miscible	#VALUE!	#VALUE!	671
2-Methoxypropan-1-ol	0.031904	2.38834	0.548406	0.058532	1.55868	0.804482	672
2-Methoxypropane	0.0069	1.66714	0.219909	0.005645	1.98578	0.398097	673
2-Methyl-1,3-dioxolane	0.058664	2.23429	0.527586	miscible	#VALUE!	#VALUE!	674
2-Methyl-1,3-pentanediol	0.015691	2.03854	0.553441	0.008163	1.79527	0.542476	675
2-Methyl-1,3-propanediol.coskf	miscible	#VALUE!	#VALUE!	miscible	#VALUE!	#VALUE!	676
2-Methyl-1-butanol	0.007947	1.83771	0.334836	0.004133	1.42752	0.358728	677
2-Methyl-1-butene-3-yne	0.004554	0.915069	0.041663	0.000647	0.0834924	0.000236	678
2-Methyl-1-butene	0.000975	0.217	0.015009	0.00014	0.00772376	7.3e-05	679
2-Methyl-1-heptanol	0.000224	0.744439	0.163289	3.8e-05	0.402526	0.120042	680
2-Methyl-1-heptene	3e-05	0.0969159	0.011722	2e-06	0.0028023	5.1e-05	681
2-Methyl-1-hexanol	0.000618	0.9388	0.182957	0.000133	0.53745	0.139127	682
2-Methyl-1-hexene	9.5e-05	0.122163	0.012572	8e-06	0.00377221	5.7e-05	683
2-Methyl-1-nonene	3e-06	0.0680962	0.010708	0	0.00179463	4.4e-05	684
2-Methyl-1-octene	9e-06	0.0797778	0.011125	0	0.00219159	4.7e-05	685
2-Methyl-1-pentanol	0.002181	1.32605	0.239264	0.000663	0.829026	0.200502	686
2-Methyl-1-pentene	0.000289	0.15758	0.013496	3.2e-05	0.00516069	6.3e-05	687
2-Methyl-1-propanol	0.018975	2.21308	0.381571	0.00814	1.72376	0.318031	688
2-Methyl-1-undecanol	3e-06	0.3299	0.11089	0	0.180007	0.094596	689
2-Methyl-2-aminobutane	0.005616	2.11926	0.407354	0.003011	2.62178	0.508235	690
2-Methyl-2-butanol	0.007858	1.77851	0.319162	0.003493	1.39911	0.328636	691
2-Methyl-2-butene	0.000884	0.199604	0.013836	0.000125	0.00668846	6.6e-05	692
2-Methyl-2-pentenal	0.006289	1.89298	0.271259	0.006177	2.23225	0.329427	693
2-Methyl-2-pentene	0.000264	0.140472	0.01217	2.9e-05	0.00421357	5.6e-05	694
2-Methyl-2-propanamine	0.014486	2.57515	0.480947	0.008864	3.24146	0.574481	695
2-Methyl-2-propanol	0.029598	2.22561	0.484502	0.016615	2.0382	0.50172	696
2-Methyl-3-ethylpentane	2.3e-05	0.0498556	0.007465	1e-06	0.000812576	2.7e-05	697
2-Methyl-,_3-hydroxy-2,2,4-trimethylpentyl_propanoate.coskf	4.8e-05	0.613522	0.165316	1.4e-05	0.514731	0.132656	698
2-Methyl-3-nitrobenzoic_acid	0.004771	2.84911	0.36896	0.001263	10.7296	0.349258	699
2-Methylbenzofuran	0.000303	0.331629	0.026459	2.7e-05	0.0216487	0.00015	700
2-Methyl_benzothiophene	0.000216	0.310525	0.026285	1.6e-05	0.019509	0.000136	701
2-Methylbutane	0.000335	0.0801717	0.007528	4.2e-05	0.00132797	3e-05	702
2-Methylbutanoic_acid	0.013112	2.70041	0.396553	0.00619	4.70628	0.343307	703
2-Methylbutyraldehyde	0.008232	1.7443	0.204205	0.005782	1.59695	0.127295	704
2-Methyldecane	0	0.0346758	0.007365	0	0.000546049	2.4e-05	705
2-Methyl-dodecan-1-ol	1e-06	0.279176	0.09601	0	0.133616	0.059796	706
2-Methyldodecane	0	0.028628	0.007332	0	0.000439356	2.3e-05	707
2-Methylheptanal	0.000242	0.620945	0.099204	7.2e-05	0.431739	0.043933	708
2-Methylheptane	1.1e-05	0.0478766	0.007323	1e-06	0.000761711	2.6e-05	709
2-Methylhexanal	0.000764	0.853033	0.12097	0.000289	0.694191	0.068267	710
2-Methylhexane	3.5e-05	0.0552652	0.007359	2e-06	0.000888188	2.7e-05	711
2-Methylhexanoic_acid	0.001408	1.76578	0.265138	0.000433	2.85572	0.237697	712
2-Methylindene	0.000207	0.275233	0.024006	1.6e-05	0.0153161	0.000122	713
2-Methylnaphthalene	0.000115	0.23183	0.021727	8e-06	0.0125543	0.000108	714
2-Methylnonane	1e-06	0.0375414	0.007292	0	0.000585785	2.4e-05	715
2-Methyloctanal	8.6e-05	0.475725	0.085182	1.9e-05	0.303755	0.033573	716
2-Methyloctane	4e-06	0.0424595	0.007326	0	0.000672037	2.5e-05	717
2-Methyloctanoic_acid	0.000168	1.0915	0.196858	3.2e-05	1.68986	0.167363	718
2-Methyloxirane	0.098412	2.10581	0.473398	0.165759	1.4834	0.61573	719
2-Methylpentane	0.000108	0.0656509	0.007429	1e-05	0.00107201	2.9e-05	720
2-Methylphenol	0.008862	4.55083	0.354302	0.00381	37.7558	0.371914	721
2-Methylpropanal	0.025795	2.30792	0.292231	0.021069	2.45389	0.241075	722
2-Methylpropanenitrile	0.042619	2.41978	0.351893	0.022296	2.00196	0.102535	723
2-Methylpyrazine	0.039787	2.3768	0.599794	0.079942	1.39942	0.823905	724
2-Methyltetrahydrofuran	0.008613	2.01651	0.315076	0.00848	2.12905	0.545525	725
2-Methylthiacyclopentane	0.001042	0.407698	0.029931	0.000132	0.0255065	0.000178	726
2-Methyl_thiaindan	0.000218	0.319786	0.028928	1.6e-05	0.0202809	0.000154	727
2-Methylthiophene	0.001741	0.470846	0.027465	0.000242	0.0291753	0.000144	728
2-Methyltridecane	0	0.0271295	0.007418	0	0.000420099	2.3e-05	729
2-Methylundecane	0	0.0318697	0.007409	0	0.000502219	2.4e-05	730
2-Nitrobenzonitrile	0.007094	1.69009	0.195823	0.000849	0.524251	0.009996	731
2-Nitropropane	0.013343	1.67319	0.129953	0.003218	0.514692	0.007363	732
2-(N-Morpholino)-2'-hydroxydiethylether.coskf	0.016937	2.138	0.727429	miscible	#VALUE!	#VALUE!	733
2-Nonanol	7.2e-05	0.583799	0.15226	1.1e-05	0.350531	0.145069	734
2-Nonanone	0.000123	0.698581	0.139282	4.9e-05	0.823112	0.165852	735
2-Norbornene	0.000538	0.150441	0.012444	6.9e-05	0.00458682	5.9e-05	736
2-n-Propylthiophene	0.000197	0.238363	0.020337	1.7e-05	0.0122843	0.000104	737
2-Octanol	0.000181	0.706205	0.156161	3.3e-05	0.421408	0.133849	738
2-Octanone	0.000356	0.901621	0.157214	0.000175	1.06893	0.182879	739
2-Oxazolidone.coskf	miscible	#VALUE!	#VALUE!	miscible	#VALUE!	#VALUE!	740
2-Pentanethiol	0.00035	0.266341	0.021448	3.6e-05	0.0139463	0.000117	741
2-Pentanol	0.006168	1.74987	0.31146	0.003092	1.43953	0.367255	742
2-Pentanone	0.012522	2.32049	0.333613	0.014024	2.66871	0.463769	743
2-Pentoxyethanol	0.000608	1.15771	0.230622	0.000346	1.18793	0.322637	744
2-Pentyne	0.001906	0.523436	0.029079	0.000278	0.031662	0.000159	745
2-Phenyl-1-butene	9.5e-05	0.198532	0.019427	6e-06	0.00975189	9.5e-05	746
2-Phenyl-1-propanol	0.001674	1.38844	0.23488	0.000618	1.34427	0.235053	747
2-Phenyl-2-propanol	0.001558	1.48179	0.187801	0.000303	1.5652	0.091647	748
2-Phenylethanol	0.006763	2.12457	0.325371	0.001721	2.10308	0.20879	749
2-Phenylpropionaldehyde	0.001424	1.05357	0.125272	0.000328	0.594038	0.026312	750
2-Propanamine	0.033249	2.65194	0.550485	0.022839	3.18043	0.636398	751
2-Propanol	0.139633	1.35521	0.716344	0.061168	1.81436	0.657592	752
2-Propen-1-ol.coskf	miscible	#VALUE!	#VALUE!	0.126044	1.56684	0.687095	753
2-Propenal.coskf	miscible	#VALUE!	#VALUE!	miscible	#VALUE!	#VALUE!	754
2-Propenenitrile	0.21609	1.43919	0.537429	0.035353	1.71849	0.044602	755
2-Propylbenzothiophene	2.3e-05	0.17372	0.020132	1e-06	0.00899788	9.8e-05	756
2-Propyn-1-ol.coskf	miscible	#VALUE!	#VALUE!	miscible	#VALUE!	#VALUE!	757
2-Pyrrolidone.coskf	miscible	#VALUE!	#VALUE!	miscible	#VALUE!	#VALUE!	758
[3-(2,3-Epoxyproxy)propyl]trimethoxysilane.coskf	0.000173	0.983042	0.230995	0.000234	1.27056	0.237991	759
3,3,3-Trifluoropropene	0.004647	0.676155	0.027986	0.000804	0.0526226	0.00015	760
3,3',4,4',5,5'-Hexachlorobiphenyl	0	0.0880254	0.016345	0	0.00440018	7.5e-05	761
3,3',4,4',5-Pentachlorobiphenyl	1e-06	0.107268	0.017703	0	0.00577141	8.3e-05	762
3,3',4,4'-Tetrachlorobiphenyl	2e-06	0.132796	0.019335	0	0.0077894	9.4e-05	763
3,3',4,5,5'-Pentachlorobiphenyl	0	0.106176	0.017568	0	0.00581375	8.3e-05	764
3,3',4,5-Tetrachlorobiphenyl	2e-06	0.123789	0.018503	0	0.0068321	8.8e-05	765
3,3',4,5'-Tetrachlorobiphenyl	1e-06	0.131113	0.019133	0	0.00777752	9.4e-05	766
3,3',4-Trichlorobiphenyl	5e-06	0.156483	0.020478	0	0.00946222	0.000101	767
3,3',5,5'-Tetrachlorobiphenyl	1e-06	0.131077	0.019078	0	0.00794949	9.4e-05	768
3,3',5-Trichlorobiphenyl	4e-06	0.1537	0.020142	0	0.0093693	0.0001	769
3,3,5-Trimethylheptane	5e-06	0.0419189	0.007663	0	0.000703014	2.7e-05	770
3,3'-Dichlorobiphenyl	1.2e-05	0.188397	0.022088	0	0.0118099	0.00011	771
3,3-Diethylpentane	1.7e-05	0.0464184	0.007612	1e-06	0.000770474	2.8e-05	772
3,3-Dimethyl-1-butene	0.000406	0.15707	0.013293	4.9e-05	0.00504194	6.2e-05	773
3,3-Dimethyl-1-butyne	0.001298	0.521425	0.03245	0.000157	0.0375597	0.000186	774
3,3-Dimethyl-2-butanone	0.006778	1.76943	0.264612	0.006497	2.13746	0.347789	775
3,3-Dimethylhexane	2.5e-05	0.0510008	0.007546	2e-06	0.000841637	2.8e-05	776
3,3-Dimethylpentane	7.6e-05	0.0609983	0.007742	6e-06	0.00105063	3e-05	777
3,4,4',5-Tetrachlorobiphenyl	2e-06	0.127281	0.018793	0	0.00714626	9e-05	778
3,4,4'-Trichlorobiphenyl	5e-06	0.161673	0.020929	0	0.00994796	0.000104	779
3,4,5-Trichlorobiphenyl	4e-06	0.135486	0.018717	0	0.00716907	8.9e-05	780
3,4',5-Trichlorobiphenyl	4e-06	0.156351	0.020373	0	0.00961318	0.000101	781
3,4,5-Trichloroguaiacol	0.000154	0.790122	0.083275	2.1e-05	6.32722	0.067065	782
3,4-Dichloro-1-butene	0.001154	0.540739	0.031505	0.000131	0.0411753	0.00017	783
3,4-Dichloroaniline	0.004153	4.92374	0.23568	0.002275	219.054	0.268546	784
3,4-Dichlorobiphenyl	1.2e-05	0.173785	0.021006	0	0.0101383	0.000104	785
3,4'-Dichlorobiphenyl	1.2e-05	0.193873	0.022532	0	0.0123691	0.000113	786
3,4-Dichlorophenyl_isocyanate	9.9e-05	0.270192	0.023841	6e-06	0.0179854	0.000127	787
3,4-Dimethylhexane	2e-05	0.0490307	0.007368	1e-06	0.000788551	2.7e-05	788
3,4-Dimethylthiophene	0.000761	0.367298	0.025426	8.5e-05	0.0218824	0.000133	789
3,4-Dinitrotoluene	0.000858	0.895691	0.086206	6.2e-05	0.156849	0.001644	790
3,4-Xylenol	0.003782	3.13846	0.2862	0.001072	18.1389	0.277561	791
3,5-Dichlorobiphenyl	1e-05	0.170487	0.020565	0	0.00998891	0.000101	792
3,5-Dichloropyridine	0.00154	1.14571	0.136628	0.000479	1.5386	0.166077	793
3,5-Diisopropyl_toluene	3e-06	0.09462	0.01523	0	0.00354418	6.7e-05	794
3,5-Dimethylbenzofuran	0.000155	0.307516	0.02786	1.1e-05	0.0223443	0.000173	795
3,5-Dimethylbenzothiophene	8.2e-05	0.237436	0.023433	5e-06	0.0139162	0.000119	796
3,5-Dinitrosalicylic_acid	0.007537	3.71918	0.536507	0.001803	19.6542	0.540259	797
3,5-Dinitrotoluene	0.000948	0.94148	0.099124	9e-05	0.221739	0.003933	798
3,5-Xylenol	0.00314	3.18318	0.280404	0.000907	20.3479	0.280793	799
3,7-Dimethyl-1-octanol	4.9e-05	0.554248	0.15937	7e-06	0.307334	0.14024	800
3-Amino-1-propanol.coskf	miscible	#VALUE!	#VALUE!	miscible	#VALUE!	#VALUE!	801
3-Amino-2-chloropyridine	0.018659	3.03787	0.402364	0.006062	7.9229	0.227599	802
3-Aminopyridine.coskf	miscible	#VALUE!	#VALUE!	miscible	#VALUE!	#VALUE!	803
3-Chloro-1,2-propanediol.coskf	miscible	#VALUE!	#VALUE!	0.0818	2.17157	0.673173	804
3-Chlorobiphenyl	3.2e-05	0.216198	0.023165	1e-06	0.0132384	0.000116	805
3-Chloro-o-xylene	0.000177	0.2128	0.018885	1.5e-05	0.0102744	9.2e-05	806
3-Chloropropene	0.006862	0.904282	0.039278	0.001118	0.0716315	0.000207	807
3-Chloropropyltrichlorosilane	5.5e-05	0.218358	0.021966	3e-06	0.0128745	0.000112	808
3-chloropropyltrimethoxysilane	0.00018	0.679096	0.113473	5.3e-05	0.539467	0.050839	809
3-Ethyl-1-heptanol	0.000131	0.661701	0.17471	2.2e-05	0.362504	0.150369	810
3-Ethyl-1-hexene	3.1e-05	0.0769564	0.009606	2e-06	0.00182497	4e-05	811
3-Ethyl-1-pentene	0.000117	0.113422	0.011712	1e-05	0.0032778	5.3e-05	812
3-Ethyl-2,5-dimethylthiophene	7.4e-05	0.173315	0.018126	5e-06	0.00771928	8.8e-05	813
3-Ethylbenzothiophene	8.6e-05	0.234888	0.023164	5e-06	0.013793	0.000117	814
3-Ethyldodecane	0	0.026912	0.007388	0	0.000413981	2.3e-05	815
3-Ethyl_heptanal	0.000153	0.578877	0.105246	4.3e-05	0.48742	0.066371	816
3-Ethylheptane	5e-06	0.0418249	0.007251	0	0.000650137	2.5e-05	817
3-Ethylhexane	1.5e-05	0.0464638	0.007212	1e-06	0.000720963	2.6e-05	818
3-Ethyl-o-xylene	6e-05	0.149236	0.016758	4e-06	0.00604876	7.9e-05	819
3-Ethylpentane	5.2e-05	0.0552767	0.007321	4e-06	0.000876932	2.7e-05	820
3-Heptanol	0.00048	0.858132	0.172737	0.00011	0.517035	0.15379	821
3-Heptanone	0.000886	1.08669	0.17198	0.000512	1.36053	0.225993	822
3-Hexanol	0.001442	1.15927	0.205411	0.000394	0.761933	0.181847	823
3-Hexanone	0.002911	1.48773	0.208763	0.001958	1.85004	0.267357	824
3-Hexyne	0.000509	0.311827	0.022172	5.7e-05	0.015861	0.000118	825
3-Hydroxy-2-methyl_propionaldehyde.coskf	miscible	#VALUE!	#VALUE!	miscible	#VALUE!	#VALUE!	826
3-Hydroxy-4-methyloxybenzoic_acid	0.00818	3.04836	0.461275	0.003458	8.65817	0.425516	827
3-Hydroxybenzaldehyde	0.045241	2.37887	0.634919	0.016139	5.48687	0.488957	828
3-Hydroxybenzoic_acid.coskf	miscible	#VALUE!	#VALUE!	miscible	#VALUE!	#VALUE!	829
3-Hydroxybenzonitrile	0.03652	2.89003	0.609792	0.011958	10.3781	0.509042	830
3-Hydroxybutyrolactone.coskf	miscible	#VALUE!	#VALUE!	miscible	#VALUE!	#VALUE!	831
3-Hydroxypyridine.coskf	miscible	#VALUE!	#VALUE!	0.027358	4.22059	0.375148	832
3-Mercaptopropionic_acid.coskf	miscible	#VALUE!	#VALUE!	0.102841	1.73446	0.798811	833
[3-(Mercapto)propyl]triethoxysilane	5e-06	0.3623	0.089474	1e-06	0.433078	0.096401	834
3-Methoxy-1-butanol	0.017623	2.18209	0.527823	0.015708	1.93855	0.640446	835
3-Methoxyisopropylamine	0.017228	2.63516	0.554824	0.018619	2.54364	0.707944	836
3-Methoxypropionitrile	0.062999	2.17229	0.484492	0.03478	2.15384	0.172331	837
3-Methyl-1,2-butadiene	0.001467	0.327699	0.018812	0.00022	0.0149735	9.5e-05	838
3-Methyl-1,4-pentadiene	0.000691	0.273488	0.018995	8.4e-05	0.0125532	9.6e-05	839
3-Methyl-1-butanol	0.007946	1.84814	0.34663	0.003429	1.32117	0.329447	840
3-Methyl-1-butene	0.000959	0.204771	0.014308	0.000138	0.00698232	6.9e-05	841
3-Methyl-1-butyne	0.003175	0.714728	0.037384	0.000428	0.0545459	0.000212	842
3-Methyl-1-hexene	0.000106	0.116915	0.012071	9e-06	0.00345713	5.4e-05	843
3-Methyl-1H-indole	0.002604	3.45097	0.203539	0.000905	124.976	0.249658	844
3-Methyl-1-pentanol	0.003297	1.48054	0.285779	0.001117	1.04097	0.28074	845
3-Methyl-1-pentene	0.000311	0.148525	0.01287	3.5e-05	0.00463808	6e-05	846
3-Methyl-2-butanol	0.005825	1.61271	0.245466	0.001826	1.18295	0.205212	847
3-Methyl-2-butanone	0.013817	2.21298	0.321006	0.016131	2.51445	0.435393	848
3-Methyl-2-pentanone	0.004956	1.70773	0.25422	0.004624	2.11722	0.349308	849
3-Methyl-3-ethylpentane	3.1e-05	0.0499823	0.007439	2e-06	0.000805239	2.7e-05	850
3-Methyl-3-pentanol	0.002086	1.20416	0.220537	0.00066	0.81757	0.21146	851
3-Methylacryloxypropyltrichlorosilane.coskf	7e-06	0.269006	0.052394	0	0.0979707	0.006805	852
3-Methylbutyraldehyde	0.009397	1.90681	0.228015	0.006821	1.91685	0.168481	853
3-Methyl-cis-2-pentene	0.000288	0.1388	0.012121	3.2e-05	0.00413538	5.6e-05	854
3-Methylcyclopentene	0.000556	0.153393	0.012077	7.2e-05	0.00452838	5.7e-05	855
3-Methyldecane	0	0.034497	0.007337	0	0.000540903	2.4e-05	856
3-Methyldodecane	0	0.0290827	0.007364	0	0.000450245	2.3e-05	857
3-Methylheptane	1.2e-05	0.0477777	0.007302	1e-06	0.000757593	2.6e-05	858
3-Methylhexanal	0.000993	0.957392	0.134424	0.000396	0.799663	0.07619	859
3-Methylhexane	3.7e-05	0.0547656	0.007314	3e-06	0.000873392	2.7e-05	860
3-Methylmercapto-propanal	0.014603	2.13171	0.252143	0.004814	1.52538	0.06184	861
3-Methylnonane	1e-06	0.037845	0.0073	0	0.000593438	2.5e-05	862
3-Methyloctane	4e-06	0.0421744	0.007293	0	0.000663731	2.5e-05	863
3-Methylpentane	0.000116	0.0649555	0.007383	1.1e-05	0.00105254	2.9e-05	864
3-Methyl_sulfolane	0.065867	1.88148	0.55726	0.058467	1.5	0.147149	865
3-Methylthiophene	0.001719	0.487348	0.027732	0.000238	0.0315683	0.000147	866
3-Methyl-trans-2-pentene	0.000268	0.136278	0.011898	2.9e-05	0.00401553	5.5e-05	867
3-Methyltridecane	0	0.0268963	0.007388	0	0.000414309	2.3e-05	868
3-Methylundecane	0	0.0311167	0.007304	0	0.000479069	2.3e-05	869
3-Nitrobenzonitrile	0.005701	1.63055	0.182905	0.00066	0.490857	0.009179	870
3-Nitrobenzotrifluoride	0.000392	0.603733	0.054932	3.5e-05	0.113261	0.001296	871
3-Nitrophenol	0.02143	3.87531	0.549261	0.00798	18.8457	0.51356	872
3-(N,N-Dimethylamino)_propylamine	0.007903	2.498	0.591761	0.007289	2.68679	0.724181	873
3-Nonanone	9.8e-05	0.62622	0.127477	3.6e-05	0.738987	0.157328	874
3-Octanone	0.000346	0.911333	0.169694	0.000196	1.17398	0.242012	875
3-Pentanol	0.004921	1.54477	0.252807	0.001822	1.16974	0.265502	876
3-Pentanone	0.008655	2.04619	0.272664	0.008282	2.46625	0.364218	877
3-Phenyl-1-propanol	0.002237	1.68625	0.284364	0.000608	1.48213	0.216974	878
3-(Triethoxysilyl)propionitrile	0.000264	1.09852	0.239761	0.000182	1.27945	0.197032	879
3-(Trimethoxysilyl)-1-propanethiol	0.000128	0.625347	0.106125	2.9e-05	0.515992	0.049583	880
4-[2-(2-Aminoethoxy)ethyl]morpholine.coskf	0.009899	2.28238	0.713559	miscible	#VALUE!	#VALUE!	881
4-(2-Aminoethyl)morpholine	0.016474	2.37117	0.675413	miscible	#VALUE!	#VALUE!	882
4-((2-Hydroxyethoxy)carbonyl)_benzoic_acid.coskf	0.005283	2.22305	0.503346	0.001765	3.26362	0.411366	883
4-(2-Hydroxyethyl)morpholine	0.024843	2.26705	0.668477	miscible	#VALUE!	#VALUE!	884
4-(2-Methoxyethyl)morpholine	0.006866	2.29343	0.511128	0.019007	1.86554	0.832828	885
4,4'-Dichlorobiphenyl	1.3e-05	0.198411	0.022906	0	0.0128374	0.000115	886
4,4'-Diisopropylbiphenyl	0	0.0998295	0.018645	0	0.00464858	8.4e-05	887
4,4'-Dinitrodiphenylamine	0.000554	1.7716	0.304625	6e-05	3.19246	0.187902	888
4,4'-Dinitrotriphenylamine	8e-06	0.479869	0.105313	0	0.206191	0.011486	889
4,5,6-Trichloroguaiacol	0.000169	1.03324	0.097811	2.5e-05	14.5588	0.101189	890
4,5-Dichloroguaiacol	0.000368	1.16994	0.098868	6.1e-05	11.047	0.0791	891
4,6-Dichloroguaiacol	0.000551	1.18935	0.12713	8.8e-05	2.55737	0.064824	892
4,6-Dimethyldibenzothiophene	1.2e-05	0.172948	0.02242	0	0.00986148	0.00011	893
4,6-Dinitro-o-sec-butylphenol	5.1e-05	0.458809	0.064441	3e-06	0.189132	0.005161	894
4-Aminoacetophenone	0.024886	2.29415	0.585332	0.009417	3.10534	0.437983	895
4-Aminobenzoic_acid.coskf	miscible	#VALUE!	#VALUE!	0.039414	5.44933	0.692102	896
4-Aminosalicylic_acid	0.078439	1.77479	0.796561	0.043142	6.19587	0.774884	897
4-Bromobenzoic_acid	0.003654	2.98123	0.327283	0.001099	11.5574	0.328681	898
4-Carboxybenzaldehyde	0.016022	2.81033	0.515902	0.006798	6.31747	0.452063	899
4-Chloro-3-nitrobenzotrifluoride	0.000168	0.479166	0.046075	1.1e-05	0.0708154	0.000687	900
4-Chlorobenzoic_acid	0.004554	3.12511	0.338697	0.001416	12.3107	0.34177	901
4-Chlorobenzyl_alcohol	0.003968	2.42521	0.24856	0.000844	5.26466	0.137233	902
4-Chlorobiphenyl	3.5e-05	0.224357	0.02379	2e-06	0.0140246	0.000119	903
4-Chloroguaiacol	0.001027	1.39788	0.111246	0.000181	6.41251	0.062109	904
4-Chloro-o-xylene	0.000177	0.232537	0.019992	1.4e-05	0.0120554	0.0001	905
4-Cyclohexene-1,2-dicarboxylic-anhydride.coskf	0.006467	1.60356	0.186036	0.000648	0.421302	0.007437	906
4-Ethyl-m-xylene	4.9e-05	0.142235	0.01622	3e-06	0.00565101	7.5e-05	907
4-Ethyl-o-xylene	4.5e-05	0.138618	0.015934	3e-06	0.00539557	7.4e-05	908
4-Fluorobenzoic_acid	0.008748	3.51366	0.392654	0.003607	12.9201	0.37813	909
4-Formylmorpholine.coskf	miscible	#VALUE!	#VALUE!	miscible	#VALUE!	#VALUE!	910
4-Heptanone	0.000969	1.11905	0.176653	0.000589	1.40583	0.233767	911
4-Hexylresorcinol	0.000167	2.14964	0.278681	3.7e-05	14.7205	0.327649	912
4-Hydroxyacetophenone	0.019589	2.46326	0.554192	0.007872	3.27038	0.41461	913
4-Hydroxybenzaldehyde	0.056899	2.00768	0.688087	0.018973	4.05194	0.51715	914
4-Hydroxybenzoic_acid.coskf	miscible	#VALUE!	#VALUE!	miscible	#VALUE!	#VALUE!	915
4-Hydroxybenzonitrile	0.051496	2.35378	0.678556	0.015998	7.95714	0.543549	916
4-Hydroxybenzyl_alcohol	0.08535	1.65616	0.773531	0.02422	7.84914	0.610486	917
4-Hydroxybutyraldehyde.coskf	miscible	#VALUE!	#VALUE!	miscible	#VALUE!	#VALUE!	918
4-Hydroxymethyl_benzoic_acid	0.026893	2.4718	0.656923	0.011045	5.17247	0.569022	919
4-Hydroxystyrene	0.007418	4.67543	0.374975	0.00267	43.7183	0.400553	920
4-Iodobenzoic_acid	0.001984	2.68102	0.299115	0.000636	10.2261	0.303883	921
4-Iodophenol	0.005891	5.05823	0.363689	0.00219	56.3287	0.415071	922
4-Isobutylstyrene	1.4e-05	0.139816	0.017839	1e-06	0.00638447	8.4e-05	923
4-Methoxyphenylacetic_acid	0.004482	2.55423	0.375086	0.001185	5.99376	0.316807	924
4-Methyl-1-heptene	3.4e-05	0.0887565	0.010713	2e-06	0.00237214	4.6e-05	925
4-Methyl-1-hexene	0.000111	0.120125	0.012258	9e-06	0.00362785	5.5e-05	926
4-Methyl-1H-imidazole.coskf	miscible	#VALUE!	#VALUE!	miscible	#VALUE!	#VALUE!	927
4-Methyl-1-octanol	0.000107	0.652899	0.17233	1.7e-05	0.35298	0.147094	928
4-Methyl-1-pentene	0.000309	0.155225	0.013229	3.5e-05	0.00500405	6.2e-05	929
4-Methyl-2-pentanol	0.003594	1.48154	0.296953	0.001333	1.12734	0.328313	930
4-Methyl-cis-2-pentene	0.000281	0.145368	0.0126	3.1e-05	0.0044952	5.9e-05	931
4-Methyl-cyclohexane-methanol	0.000976	0.969858	0.200552	0.000222	0.558884	0.154107	932
4-Methylcyclopentene	0.000558	0.155885	0.012289	7.3e-05	0.00466474	5.8e-05	933
4-Methyl_dibenzothiophene	3.2e-05	0.220392	0.02488	1e-06	0.0139252	0.000126	934
4-Methylheptane	1.3e-05	0.0478038	0.007305	1e-06	0.000758295	2.6e-05	935
4-Methylmorpholine	0.013575	2.40916	0.469895	0.019521	2.13506	0.729502	936
4-Methylnonane	1e-06	0.037647	0.007289	0	0.000589073	2.5e-05	937
4-Methyloctane	4e-06	0.0420575	0.007285	0	0.00066101	2.5e-05	938
4-Methylphenanthrene	3.4e-05	0.231765	0.026486	1e-06	0.0149837	0.000135	939
4-Methylphenol	0.00885	4.08874	0.350482	0.003514	25.6237	0.3406	940
4-Methyl-trans-2-pentene	0.000245	0.130007	0.011507	2.6e-05	0.00367684	5.3e-05	941
4-Nitrobenzonitrile	0.005273	1.5973	0.174148	0.000575	0.461543	0.008225	942
4-Nitrophenol	0.029439	3.32103	0.60291	0.009269	14.8154	0.521443	943
4-Nonanone	0.000144	0.737497	0.159636	7.1e-05	0.990661	0.257224	944
4-Octanone	0.000399	0.941866	0.179711	0.000249	1.25165	0.281217	945
4-tert-Butylphenol	0.000792	2.1786	0.223102	0.000178	14.5448	0.223942	946
4-[(Tetrahydro-2-furanyl)oxy]-1-butanol.coskf	0.003165	1.75158	0.440965	0.003781	1.75672	0.613027	947
5-Chloro-3-pyridinol	0.027384	3.0554	0.5385	0.007182	10.221	0.336389	948
5-Chloroguaiacol	0.00093	1.36405	0.106145	0.000166	8.15695	0.065688	949
5-Chlorovanillin	0.003232	1.80061	0.293792	0.000935	1.7859	0.162539	950
5-Ethylidine-2-norbornene	0.000141	0.161276	0.015982	1.2e-05	0.00629964	7.6e-05	951
5-Ethyl-m-xylene	3.4e-05	0.127452	0.015074	2e-06	0.00469708	6.8e-05	952
5-Hexen-2-one	0.007583	2.01599	0.260586	0.005293	2.33778	0.234435	953
5-Methyl-1-hexanol	0.000846	1.07934	0.228641	0.000233	0.697398	0.220615	954
5-Methyl-1-hexene	0.000104	0.123147	0.012529	9e-06	0.0037917	5.7e-05	955
5-Methyl-2-hexanone	0.001564	1.33517	0.208905	0.00112	1.66963	0.266721	956
5-Methylindan	8.6e-05	0.165827	0.017347	6e-06	0.00695364	8.4e-05	957
5-Methylnonane	1e-06	0.0379102	0.007301	0	0.000594544	2.5e-05	958
5-Nonanone	0.0001	0.611007	0.122598	3.6e-05	0.697733	0.142914	959
5-o-Tolyl-2-pentene	1.4e-05	0.15857	0.019942	1e-06	0.00775831	9.7e-05	960
6-Aminohexanamide.coskf	miscible	#VALUE!	#VALUE!	miscible	#VALUE!	#VALUE!	961
6-Aminohexanol	0.009994	2.24903	0.635907	0.009148	2.1902	0.745239	962
6-Chloronicotinic_acid	0.010087	3.03903	0.442733	0.003837	7.25207	0.358488	963
6-Hydroxyhexanoic_acid	0.03185	2.0123	0.694957	0.015718	2.5613	0.572472	964
6-Methyl-1-heptene	3.2e-05	0.0969963	0.01165	2e-06	0.00279513	5.1e-05	965
6-Methyl-1-octanol	0.000105	0.648887	0.169232	1.6e-05	0.348936	0.140615	966
7-Methyl-1-octene	1e-05	0.0804389	0.011102	0	0.00220851	4.7e-05	967
8-Hydroxyquinoline	0.000907	0.768782	0.069385	0.000136	0.421404	0.007339	968
8-Methyl-1-nonanol	3.1e-05	0.513132	0.144856	4e-06	0.282888	0.121436	969
8-Methyl-1-nonene	3e-06	0.0673946	0.010572	0	0.00175566	4.3e-05	970
8-Methylquinoline	0.000725	1.10443	0.172955	0.000203	1.74842	0.25963	971
Abietic_acid	2e-06	0.438162	0.12695	0	0.782307	0.095148	972
Acenaphthalene	0.000158	0.275562	0.024612	1.1e-05	0.0169006	0.000124	973
Acenaphthene	9.3e-05	0.204598	0.02062	6e-06	0.0103328	0.000101	974
Acetal	0.000868	0.993837	0.167825	0.0007	1.35225	0.302981	975
Acetaldehyde.coskf	miscible	#VALUE!	#VALUE!	miscible	#VALUE!	#VALUE!	976
Acetaldol.coskf	miscible	#VALUE!	#VALUE!	miscible	#VALUE!	#VALUE!	977
Acetaldoxime.coskf	miscible	#VALUE!	#VALUE!	miscible	#VALUE!	#VALUE!	978
Acetamide.coskf	miscible	#VALUE!	#VALUE!	miscible	#VALUE!	#VALUE!	979
Acetaminophen	0.030903	2.25779	0.683223	0.00947	4.42691	0.511987	980
Acetanilide	0.007064	2.25199	0.368125	0.001937	2.32246	0.233194	981
Acetic_acid.coskf	miscible	#VALUE!	#VALUE!	miscible	#VALUE!	#VALUE!	982
Acetic_anhydride	0.05422	2.26948	0.492921	0.030825	2.9112	0.317278	983
Acetoacetanilide	0.001472	1.55876	0.259032	0.000652	1.79306	0.195713	984
Acetoacetic_acid.coskf	miscible	#VALUE!	#VALUE!	miscible	#VALUE!	#VALUE!	985
Acetoin.coskf	miscible	#VALUE!	#VALUE!	miscible	#VALUE!	#VALUE!	986
Acetol.coskf	miscible	#VALUE!	#VALUE!	miscible	#VALUE!	#VALUE!	987
Acetomethoxane	0.001133	1.19828	0.190007	0.000656	0.885195	0.070031	988
Acetone.coskf	miscible	#VALUE!	#VALUE!	miscible	#VALUE!	#VALUE!	989
Acetone_cyanohydrin.coskf	miscible	#VALUE!	#VALUE!	0.079521	2.72212	0.617836	990
Acetonitrile.coskf	miscible	#VALUE!	#VALUE!	miscible	#VALUE!	#VALUE!	991
Acetovanillone	0.002844	1.73505	0.29848	0.000988	1.61718	0.196418	992
Acetoxyacetic_acid.coskf	miscible	#VALUE!	#VALUE!	0.059747	3.23586	0.69532	993
Acetylacetone	0.100384	1.67602	0.635113	0.178793	1.4224	0.556471	994
Acetyl_chloride	0.020535	1.72888	0.080773	0.003791	0.216116	0.000606	995
Acetylene.coskf	miscible	#VALUE!	#VALUE!	0.048074	1.36588	0.001596	996
Acetylsalicylic_acid	0.003249	2.48551	0.338631	0.000858	7.39064	0.303989	997
Acridine	0.00022	0.893742	0.163494	4.9e-05	1.47685	0.247808	998
Acrolein_cyanohydrin.coskf	miscible	#VALUE!	#VALUE!	0.093353	2.67707	0.711627	999
Acrylamide.coskf	miscible	#VALUE!	#VALUE!	miscible	#VALUE!	#VALUE!	1000
Acrylic_acid.coskf	miscible	#VALUE!	#VALUE!	miscible	#VALUE!	#VALUE!	1001
Acryloxy_propionic_acid	0.019768	2.64238	0.562212	0.008711	4.61199	0.450414	1002
Acyclovir.coskf	miscible	#VALUE!	#VALUE!	miscible	#VALUE!	#VALUE!	1003
Adamantane	4.1e-05	0.0428379	0.006764	3e-06	0.000589248	2.4e-05	1004
Adipic_acid.coskf	miscible	#VALUE!	#VALUE!	miscible	#VALUE!	#VALUE!	1005
Adiponitrile	0.085464	1.61934	0.637776	0.023825	1.78776	0.159573	1006
Agathadiol	8e-06	0.531103	0.233506	1e-06	0.414344	0.243803	1007
Allyl_acetate	0.008671	1.9824	0.221983	0.00454	1.49005	0.07671	1008
Allyl_acrylate	0.002951	1.38691	0.148958	0.000953	0.871569	0.038421	1009
Allylamine	0.079856	2.14398	0.639192	0.045094	3.29714	0.65536	1010
Allyl_ether	0.002163	1.33717	0.150928	0.000902	1.60531	0.153687	1011
Allyl_glycidyl_ether	0.006254	1.88853	0.244502	0.004126	1.90084	0.157333	1012
Allylidene_diacetate	0.001872	1.36194	0.17611	0.00042	0.613595	0.021879	1013
Allyl_methacrylate	0.000882	0.894532	0.10271	0.000211	0.391818	0.015272	1014
Allyl-tert-butylperoxide	0.00047	0.722745	0.101892	0.000144	0.55671	0.050339	1015
alpha-Epichlorohydrin	0.023568	2.19223	0.189566	0.005973	1.07618	0.018588	1016
alpha-Hydroxyisobutyramide.coskf	miscible	#VALUE!	#VALUE!	miscible	#VALUE!	#VALUE!	1017
alpha-Hydroxyisobutyric_acid	0.116444	1.33909	0.787266	0.030991	4.04926	0.54677	1018
alpha-Methylbenzyl_alcohol	0.004061	1.75866	0.264471	0.00105	1.52292	0.186469	1019
alpha-Methylbenzyl_alcohol_formate	0.000933	0.933923	0.105936	0.000136	0.348258	0.00931	1020
alpha-Methylstyrene	0.00028	0.281355	0.022999	2.5e-05	0.015581	0.000116	1021
alpha-Phellandrene	2.8e-05	0.104652	0.013375	2e-06	0.00342998	5.9e-05	1022
alpha-Pinene	2.6e-05	0.063766	0.009044	1e-06	0.00137533	3.6e-05	1023
alpha-Terpinene	2.5e-05	0.101597	0.013233	1e-06	0.0032553	5.8e-05	1024
alpha-Terpineol	0.000295	0.796787	0.178629	6e-05	0.575675	0.161257	1025
alpha-Tocopherol	0	0.086337	0.040242	0	0.0668421	0.01267	1026
Aminoacetonitrile.coskf	miscible	#VALUE!	#VALUE!	miscible	#VALUE!	#VALUE!	1027
Aminocapronitrile	0.022909	2.47792	0.663307	0.026344	2.54558	0.740691	1028
Aminopyrine	7.8e-05	0.816321	0.212956	5e-05	1.31875	0.376841	1029
Ammonia.coskf	miscible	#VALUE!	#VALUE!	miscible	#VALUE!	#VALUE!	1030
Amobarbital	0.001844	1.93898	0.445651	0.000986	3.63339	0.434984	1031
Androstanolone	6.4e-05	0.734563	0.291635	3.5e-05	0.800623	0.399265	1032
Anethole	0.000128	0.375676	0.038614	9e-06	0.056283	0.000775	1033
Aniline	0.022672	3.27464	0.323099	0.006693	12.5058	0.140971	1034
Anthracene	4.6e-05	0.233899	0.024718	2e-06	0.0146514	0.000124	1035
Anthraquinone	0.000288	0.701971	0.111354	5.4e-05	0.256137	0.011114	1036
Antipyrine	0.00146	1.79167	0.384051	0.001504	2.48122	0.595861	1037
Ascorbic_acid.coskf	miscible	#VALUE!	#VALUE!	miscible	#VALUE!	#VALUE!	1038
Atrazine	9.9e-05	0.886056	0.179493	1.5e-05	0.852813	0.1221	1039
Azelaic_acid	0.002031	2.35043	0.477098	0.000985	4.56168	0.474864	1040
Aziridine.coskf	miscible	#VALUE!	#VALUE!	miscible	#VALUE!	#VALUE!	1041
Barbital	0.038713	1.8629	0.734051	0.032844	2.73244	0.728032	1042
Benzaldehyde	0.009174	1.88373	0.218352	0.004605	1.5258	0.088448	1043
Benzamide	0.069583	1.6553	0.742683	0.021988	2.7843	0.57665	1044
Benzanthracene	1e-05	0.230551	0.028904	0	0.0169801	0.000151	1045
Benzene-1,2,4-tricarboxylic_acid_trimethyl_ester.coskf	0.000254	0.910274	0.171772	5.3e-05	0.422191	0.024002	1046
Benzene	0.003273	0.505497	0.026555	0.0005	0.030001	0.000136	1047
Benzenesulfonic_acid	0.015982	4.43035	0.56366	0.006721	27.5827	0.594235	1048
Benzidine	0.002963	3.8955	0.306247	0.001066	71.6153	0.183633	1049
Benzoic_acid	0.012195	3.28769	0.406538	0.005281	9.628	0.375734	1050
Benzonitrile	0.0077	1.71852	0.169861	0.001786	0.772586	0.019255	1051
Benzothiophene	0.000595	0.417195	0.028969	5.8e-05	0.0297182	0.000154	1052
Benzotrichloride	7.5e-05	0.179536	0.017974	5e-06	0.00883627	8.6e-05	1053
Benzotrifluoride	0.000363	0.29174	0.020913	3.7e-05	0.017107	0.000107	1054
Benzoyl_chloride	0.000624	0.454756	0.034967	6.4e-05	0.0423452	0.000287	1055
Benzoyl_peroxide	2.3e-05	0.412598	0.066926	1e-06	0.0967669	0.00292	1056
Benzyl_acetate	0.000846	1.01735	0.130127	0.000199	0.620185	0.031884	1057
Benzyl_alcohol	0.010319	2.34479	0.337433	0.003693	2.27131	0.221123	1058
Benzyl_benzoate	3.7e-05	0.434148	0.068524	3e-06	0.150936	0.006302	1059
Benzyl_chloride	0.000737	0.472841	0.031547	7.2e-05	0.0340957	0.000169	1060
Benzyl_dichloride	0.000337	0.44465	0.032155	2.8e-05	0.0371025	0.000178	1061
Benzyl_ethyl_ether	0.00018	0.403101	0.048206	2.6e-05	0.221679	0.012845	1062
Benzyl_formate	0.004427	1.59592	0.181282	0.000705	0.711051	0.018958	1063
Benzyl_mercaptan	0.000877	0.595784	0.042058	7.6e-05	0.0484258	0.000239	1064
beta-Carotene	0	0.0398203	0.018564	0	0.00168756	7.2e-05	1065
beta-Cholesterol	0	0.136787	0.083014	0	0.0696793	0.060444	1066
Betamethasone_acetate	9.1e-05	0.958504	0.406407	2.7e-05	0.899442	0.323163	1067
Betamethasone	0.001057	1.2952	0.594105	0.000509	1.25424	0.582221	1068
beta-Phellandrene	3.6e-05	0.117933	0.014576	2e-06	0.0041929	6.6e-05	1069
beta-Pinene	4.5e-05	0.0911219	0.011823	3e-06	0.00262068	5.2e-05	1070
beta-Propiolactone.coskf	miscible	#VALUE!	#VALUE!	0.061501	1.42774	0.052505	1071
beta-Terpineol	0.000261	0.757691	0.162904	4.6e-05	0.526397	0.131184	1072
Bicyclo[2.2.1]heptane	0.000221	0.0699447	0.007516	2.4e-05	0.00114917	3e-05	1073
Bicyclo[2.2.2]octane	8.6e-05	0.0520605	0.006895	7e-06	0.00074745	2.6e-05	1074
Bicyclohexyl	2e-06	0.0307123	0.006689	0	0.000414944	2.2e-05	1075
Biphenyl	9.3e-05	0.264058	0.025411	5e-06	0.0162298	0.000129	1076
Bis-(2-aminoethyl)ether.coskf	miscible	#VALUE!	#VALUE!	miscible	#VALUE!	#VALUE!	1077
Bis-2-chloroethyl-2-chloroethyl_phosphonate.coskf	0.001213	1.63976	0.338384	0.000387	2.19366	0.312015	1078
Bis-2-chloroethyl_sulfide	0.000595	0.696736	0.050534	3.8e-05	0.063275	0.000292	1079
Bis-2-hydroxyethyl-terephthalate	0.001688	1.82358	0.496617	0.000854	1.88521	0.403989	1080
Bis[3-(triethoxysilyl)propyl]disulfide.coskf	0	0.221767	0.114727	0	0.271314	0.12212	1081
Bis[3-(trimethoxysilyl)propyl]disulfide.coskf	0	0.301541	0.107598	0	0.245197	0.050609	1082
Bis(alpha-methylbenzyl)_ether	5e-06	0.221821	0.039238	0	0.136665	0.010163	1083
Bis-chloromethyl_ether	0.007147	1.48959	0.06843	0.00093	0.194097	0.000431	1084
Bis-cyanoethyl_ether	0.029003	2.01739	0.474081	0.007196	1.24457	0.079882	1085
Bis-difluoromethyl_ether	0.016648	3.21939	0.106348	0.003034	0.923679	0.000851	1086
Bisphenol_A	0.000593	3.04161	0.394418	0.000167	23.0952	0.447606	1087
Bis(trifluoromethyl)sulfide	0.000183	0.0636189	0.006967	1.9e-05	0.000965353	2.7e-05	1088
Boric_acid.coskf	miscible	#VALUE!	#VALUE!	miscible	#VALUE!	#VALUE!	1089
Boron_tribromide	0.00076	0.188124	0.012649	0.000106	0.00687119	6e-05	1090
Boron_trichloride	0.001729	0.263256	0.013652	0.0003	0.0132798	7e-05	1091
Boron_trifluoride	0.07253	4.25882	0.125374	0.018183	3.07184	0.001226	1092
Bromine	0.011187	0.599772	0.020794	0.002855	0.0392301	0.000113	1093
Bromobenzene	0.000882	0.377994	0.023847	0.000106	0.0230285	0.000122	1094
Bromochlorodifluoromethane	0.001183	0.152784	0.009717	0.000191	0.00423983	4.7e-05	1095
Bromochloromethane	0.014792	1.60099	0.05807	0.002842	0.199863	0.000307	1096
Bromodifluoromethane	0.015022	1.93162	0.056933	0.003473	0.354811	0.000341	1097
Bromoethane	0.009173	0.848235	0.036546	0.001761	0.0585086	0.000189	1098
Bromotrichloromethane	0.000482	0.153127	0.011794	6.2e-05	0.00501895	5.5e-05	1099
Bromotrifluoroethylene	0.00106	0.158165	0.010038	0.000166	0.00454584	4.9e-05	1100
Bromotrifluoromethane	0.001968	0.15492	0.008969	0.00037	0.00387326	4.3e-05	1101
Butabarbital	0.005784	2.10202	0.506139	0.003386	3.76737	0.492849	1102
Butanal	0.027815	2.42911	0.324821	0.025129	2.63089	0.300762	1103
Butane	0.000792	0.0947814	0.007372	0.000119	0.0015248	3.1e-05	1104
Butanenitrile	0.040675	2.46235	0.354816	0.019546	2.04039	0.101389	1105
Butanoic_acid	0.044596	2.62092	0.555077	0.02065	5.21485	0.462256	1106
Butyl_4-hydroxybenzoate	0.00025	1.47052	0.262545	4.9e-05	2.29717	0.227691	1107
Butyl_p-aminobenzoate	0.000274	1.25965	0.221826	4.7e-05	1.3337	0.116818	1108
Butyl_vinyl_ether	0.000535	0.489532	0.044491	7.9e-05	0.107663	0.002153	1109
Butyric_anhydride	0.000313	0.796427	0.111188	6.4e-05	0.354364	0.016151	1110
Caffeine	0.028923	1.98656	0.69501	miscible	#VALUE!	#VALUE!	1111
Camphene	5.4e-05	0.0927588	0.011893	4e-06	0.00268799	5.2e-05	1112
Camphor	0.001003	0.989109	0.187056	0.000664	1.17791	0.220624	1113
Caprinitrile	3.9e-05	0.469338	0.081594	5e-06	0.2107	0.014566	1114
Carbamyl_chloride.coskf	miscible	#VALUE!	#VALUE!	miscible	#VALUE!	#VALUE!	1115
Carbon_dioxide	0.07289	1.26954	0.043246	0.019668	0.114767	0.000192	1116
Carbon_disulfide	0.002499	0.110297	0.007149	0.000486	0.00170789	3.1e-05	1117
Carbon_monoxide	0.050131	0.359179	0.011887	0.016866	0.0105174	6.2e-05	1118
Carbon_tetrafluoride	0.00413	0.110922	0.00647	0.000869	0.00148102	2.8e-05	1119
Carbonyl_fluoride	0.028171	1.00412	0.031938	0.007515	0.0780114	0.000167	1120
Carbonyl_sulfide	0.010499	0.291667	0.012042	0.002823	0.00851156	6e-05	1121
Cellobiose	0.004255	1.80369	0.567998	0.002007	1.83184	0.528435	1122
Cetyl_methacrylate	0	0.0778551	0.032168	0	0.0194353	0.003679	1123
Chlorine	0.015427	0.400315	0.014198	0.004379	0.016361	7.3e-05	1124
Chloroacetaldehyde	0.072063	2.46513	0.290459	0.013056	1.2924	0.014464	1125
Chloroacetic_acid.coskf	miscible	#VALUE!	#VALUE!	miscible	#VALUE!	#VALUE!	1126
Chloroacetyl_chloride	0.00992	2.03245	0.08557	0.001426	0.330264	0.000632	1127
Chlorobenzene	0.001101	0.394585	0.02377	0.000141	0.0239959	0.000122	1128
Chlorocyclohexane	0.000374	0.224075	0.018941	4.1e-05	0.00984614	9.6e-05	1129
Chlorodifluoromethane	0.019932	2.21857	0.061595	0.005039	0.442081	0.000363	1130
Chloroethane	0.013116	0.947168	0.03906	0.002731	0.0676712	0.0002	1131
Chlorofluoromethane	0.052018	2.44933	0.097713	0.010145	0.424575	0.000482	1132
Chloroform	0.004207	0.87931	0.034331	0.000713	0.105548	0.000212	1133
Chloromethane	0.056125	1.65396	0.068653	0.012446	0.169845	0.000301	1134
Chloro_methyl_methyl_ether	0.030059	2.27977	0.19248	0.009408	1.37014	0.029408	1135
Chloropentafluoroethane	0.000353	0.0708833	0.006898	4.5e-05	0.00110584	2.8e-05	1136
Chloroprene	0.00262	0.553531	0.027121	0.00039	0.0382837	0.000143	1137
Chloropyrifos	0	0.130364	0.024736	0	0.0093955	0.000164	1138
Chlorosulfonic_acid.coskf	miscible	#VALUE!	#VALUE!	miscible	#VALUE!	#VALUE!	1139
Chlorotrifluoroethylene	0.001242	0.134286	0.008806	0.000206	0.0029665	4e-05	1140
Chlorotrifluoromethane	0.00239	0.125222	0.007635	0.000459	0.00225842	3.4e-05	1141
Cholesterol_acetate	0	0.0735738	0.037818	0	0.0266207	0.007273	1142
Cholesteryl_benzoate	0	0.0531322	0.028955	0	0.0116315	0.002334	1143
Chrysene	8e-06	0.192478	0.025219	0	0.0128365	0.000127	1144
Cimetidine	0.003418	1.91376	0.602911	0.000505	2.44856	0.411102	1145
Cinnamic_acid	0.004772	2.38523	0.350858	0.001259	3.72747	0.258302	1146
cis-1,2-Dichloroethene	0.006606	0.948764	0.036388	0.001198	0.0946858	0.000202	1147
cis-1,2-Dimethylcyclohexane	4.6e-05	0.0495585	0.007076	3e-06	0.000740178	2.6e-05	1148
cis-1,2-Dimethylcyclopentane	0.000107	0.059203	0.007249	1e-05	0.000921663	2.8e-05	1149
cis-1,3-Dichloropropene	0.003501	0.893517	0.043049	0.00044	0.0826559	0.000237	1150
cis-1,3-Dimethylcyclohexane	5.9e-05	0.0528582	0.00731	5e-06	0.000833142	2.7e-05	1151
cis-1,3-Dimethylcyclopentane	8e-05	0.0580118	0.007169	7e-06	0.000892672	2.7e-05	1152
cis-1,3-Pentadiene	0.001963	0.425414	0.02337	0.000303	0.0226784	0.00012	1153
cis-1,4-Dimethylcyclohexane	4.5e-05	0.0514674	0.007235	3e-06	0.000797302	2.7e-05	1154
cis-1,8-Terpin	0.0023	1.46156	0.447833	0.001136	1.23175	0.518674	1155
cis-1-Propenylbenzene	0.000244	0.260303	0.021817	2.1e-05	0.0136298	0.000109	1156
cis-2-Butene-1,4-diol.coskf	miscible	#VALUE!	#VALUE!	miscible	#VALUE!	#VALUE!	1157
cis-2-Butene	0.002682	0.297508	0.016237	0.000469	0.0114411	8.1e-05	1158
cis-2-Decene	2e-06	0.0637084	0.010169	0	0.00159994	4.1e-05	1159
cis-2-Dodecene	0	0.0494664	0.009757	0	0.00116376	3.7e-05	1160
cis-2-Heptene	7.6e-05	0.111354	0.01167	6e-06	0.00322185	5.2e-05	1161
cis-2-Hexene	0.000238	0.144092	0.012583	2.5e-05	0.00444919	5.8e-05	1162
cis-2-Methylcyclohexanol	0.002278	1.2056	0.231008	0.000754	0.802084	0.221015	1163
cis-2-Nonene	8e-06	0.0750062	0.010511	0	0.00196566	4.4e-05	1164
cis-2-Octene	2.4e-05	0.089644	0.011027	1e-06	0.00246055	4.8e-05	1165
cis-2-Pentene	0.000753	0.194066	0.013739	0.000103	0.00646017	6.6e-05	1166
cis-2-Phenyl-2-butene	9.6e-05	0.205733	0.019912	6e-06	0.0102059	9.8e-05	1167
cis-3-Heptene	7e-05	0.102888	0.011024	5e-06	0.00280368	4.9e-05	1168
cis-3-Hexene	0.000205	0.1331	0.011817	2.1e-05	0.00388918	5.4e-05	1169
cis-3-Methylcyclohexanol	0.001687	1.03889	0.20281	0.000487	0.629319	0.181892	1170
cis-3-Octene	2.4e-05	0.0873102	0.010776	1e-06	0.0023396	4.7e-05	1171
cis-4-Methylcyclohexanol	0.003066	1.36636	0.287187	0.001114	0.980271	0.312514	1172
cis-4-Octene	2.2e-05	0.0854947	0.010673	1e-06	0.00226632	4.6e-05	1173
cis-Crotonaldehyde	0.033929	2.42401	0.314784	0.022688	2.64338	0.236024	1174
cis-Crotonic_acid	0.056614	2.72575	0.565014	0.02526	7.82256	0.481419	1175
cis-Crotonitrile	0.048027	2.40902	0.33558	0.018077	1.73031	0.063089	1176
cis-Decahydronaphthalene	1.5e-05	0.0400843	0.006876	1e-06	0.000568265	2.4e-05	1177
cis-Dicyano-1-butene	0.056176	1.85968	0.54635	0.009238	1.33175	0.081273	1178
cis-Stilbene	2.3e-05	0.20362	0.023899	1e-06	0.0119742	0.000118	1179
cis,trans-2,4-Hexadiene	0.000569	0.274486	0.019127	6.6e-05	0.0126785	9.7e-05	1180
Citraconic_acid.coskf	miscible	#VALUE!	#VALUE!	0.03369	3.97002	0.640927	1181
Citric_acid.coskf	miscible	#VALUE!	#VALUE!	miscible	#VALUE!	#VALUE!	1182
Codeine	7.5e-05	0.865077	0.256005	3e-05	1.26072	0.339885	1183
Cortisone_acetate	0.000137	1.01481	0.396805	9.6e-05	1.06538	0.343467	1184
Cortisone	0.002798	1.48675	0.654399	0.005056	1.54324	0.741182	1185
Cumene	0.000154	0.191406	0.017925	1.3e-05	0.00844934	8.6e-05	1186
Cumene_hydroperoxide	0.001246	1.26066	0.163985	0.000263	1.51401	0.077361	1187
Cyanazine	0.000126	1.09916	0.202853	1.7e-05	1.5543	0.114568	1188
Cyanogen_chloride	0.124311	2.05335	0.228744	0.026698	0.67535	0.005224	1189
Cyanogen	0.042772	1.87064	0.083583	0.008341	0.214029	0.000389	1190
Cyclobutane	0.001771	0.119016	0.007849	0.000326	0.00208187	3.4e-05	1191
Cycloheptane	0.000101	0.052477	0.006743	9e-06	0.000727951	2.5e-05	1192
Cycloheptene	0.000244	0.112428	0.01089	2.7e-05	0.00296925	5e-05	1193
Cyclohexanecarboxaldehyde	0.002491	1.15492	0.154933	0.001333	1.00003	0.09336	1194
Cyclohexane	0.00024	0.0620632	0.006739	2.7e-05	0.000863601	2.6e-05	1195
Cyclohexanol	0.007113	1.68394	0.344722	0.003337	1.24694	0.375086	1196
Cyclohexanone	0.016764	2.3785	0.41441	0.028744	2.18015	0.675799	1197
Cyclohexanone_oxime	0.006917	1.92464	0.305988	0.002427	1.72537	0.202178	1198
Cyclohexene	0.000651	0.155063	0.012256	8.8e-05	0.00454568	5.8e-05	1199
Cyclohexyl_acetate	0.000512	0.751767	0.117311	0.0002	0.522004	0.049349	1200
Cyclohexylamine	0.004136	2.00784	0.418505	0.001964	2.38845	0.524145	1201
Cyclohexylbenzene	1.9e-05	0.112508	0.015029	1e-06	0.00417658	6.7e-05	1202
Cyclohexyl_formate	0.004373	1.55952	0.20722	0.001633	1.02671	0.059026	1203
Cyclohexyl_hydroperoxide	0.005486	2.00589	0.289162	0.001798	2.57337	0.220134	1204
Cyclohexyl_-isocyanate	0.000241	0.232771	0.021777	2.3e-05	0.0119487	0.000124	1205
Cyclohexyl_mercaptan	0.000398	0.279926	0.024008	4.2e-05	0.0154129	0.000135	1206
Cyclonite	0.003026	1.99186	0.176382	0.000106	0.510799	0.00305	1207
Cyclooctane	4.8e-05	0.0474967	0.006878	4e-06	0.000679108	2.5e-05	1208
Cyclooctene	0.000115	0.0897404	0.010093	1e-05	0.00222416	4.5e-05	1209
Cyclopentadiene	0.006083	0.641006	0.030334	0.001059	0.0406933	0.000159	1210
Cyclopentane	0.000615	0.083186	0.007199	8.8e-05	0.00127821	2.9e-05	1211
Cyclopentanol	0.014604	1.98209	0.390283	0.007227	1.49945	0.3998	1212
Cyclopentanone	0.044941	2.37722	0.511437	miscible	#VALUE!	#VALUE!	1213
Cyclopentene	0.001703	0.218124	0.013636	0.00029	0.00709769	6.6e-05	1214
Cyclopentylacetic_acid	0.009792	2.64252	0.461989	0.004513	4.40289	0.395471	1215
Cyclopentylamine	0.007333	2.29355	0.426782	0.004404	2.83734	0.525276	1216
Cyclopropanecarboxamide.coskf	miscible	#VALUE!	#VALUE!	miscible	#VALUE!	#VALUE!	1217
Cyclopropane_carboxylic_acid.coskf	miscible	#VALUE!	#VALUE!	0.066682	2.98152	0.636207	1218
Cyclopropane	0.010071	0.447752	0.017912	0.002514	0.0187319	9e-05	1219
Cyclopropylamine.coskf	miscible	#VALUE!	#VALUE!	miscible	#VALUE!	#VALUE!	1220
Cyclopropyl_cyanide	0.119233	1.84409	0.524368	0.03902	2.16778	0.124805	1221
Cyclotetramethylenetetranitramine	0.002622	1.91852	0.245532	4.2e-05	0.626141	0.005835	1222
Decachlorobiphenyl	0	0.0372949	0.010786	0	0.000967357	3.8e-05	1223
Decafluorobutane	2e-05	0.0317003	0.005602	1e-06	0.000333712	1.9e-05	1224
Decamethylcyclopentasiloxane	0	0.075907	0.024518	0	0.0129093	0.001017	1225
Decamethyltetrasiloxane	0	0.0586075	0.018674	0	0.0138619	0.001713	1226
Decan-1,10-diol	0.00024	1.07179	0.332726	6.5e-05	0.723341	0.335064	1227
Decanal	2.2e-05	0.384699	0.078469	4e-06	0.256038	0.034641	1228
Decane	1e-06	0.0359647	0.007142	0	0.000545868	2.4e-05	1229
Decanoic_acid	5e-05	0.879377	0.16927	7e-06	1.43798	0.138164	1230
Dehydroabietic_acid	3e-06	0.458868	0.129234	0	0.766712	0.093655	1231
Dehydroabietylamine	1e-06	0.51573	0.244623	0	0.734588	0.349421	1232
Desoxycorticosterone_acetate	2.4e-05	0.800627	0.301711	3e-05	1.26083	0.400023	1233
Desoxycorticosterone	0.000102	1.04091	0.378477	0.000213	1.60806	0.601973	1234
Dexamethasone_acetate	7e-05	0.900909	0.374235	3.2e-05	1.01642	0.37352	1235
Dexamethasone	0.000216	1.05962	0.421895	9.5e-05	1.07731	0.408304	1236
Dextrose.coskf	miscible	#VALUE!	#VALUE!	miscible	#VALUE!	#VALUE!	1237
Di-2-chlorethyl_ether	0.000973	0.821611	0.064782	0.000121	0.261014	0.004271	1238
Di-(2-chloroethoxy)methane	0.001029	1.12346	0.127005	0.000172	0.685431	0.025949	1239
Di-2-ethylhexyl-adipate	0	0.163511	0.07425	0	0.0818568	0.018811	1240
Di-2-ethylhexylamine	0	0.0440162	0.015065	0	0.0332587	0.013522	1241
Di(2-ethylhexyl)terephthalate	0	0.126084	0.053016	0	0.0477869	0.008205	1242
Diacetin	0.058916	1.49509	0.796819	miscible	#VALUE!	#VALUE!	1243
Diacetone_alcohol	0.018875	2.48058	0.573997	0.039591	1.7362	0.829485	1244
Diallylamine	0.001252	1.49041	0.21719	0.000378	2.22412	0.287878	1245
Diallyl_maleate	0.000241	1.13088	0.205981	7.8e-05	1.39885	0.178053	1246
Diallyl_phthalate	2.6e-05	0.513825	0.09099	1e-06	0.181351	0.007431	1247
Diallyl_sulfide	0.00047	0.448825	0.034182	4e-05	0.0316478	0.000192	1248
Diamantane	5e-06	0.0303674	0.006605	0	0.000396878	2.2e-05	1249
Diamylamine	5e-06	0.492299	0.198449	1e-06	0.536882	0.304471	1250
Diamyl_ketone	1.1e-05	0.363888	0.09287	2e-06	0.385962	0.106544	1251
Dibenzofuran	0.000105	0.278333	0.026281	6e-06	0.0186708	0.000143	1252
Dibenzo-p-dioxin	6e-05	0.249024	0.025267	3e-06	0.0166053	0.00014	1253
Dibenzopyrrole	0.000911	3.30495	0.217239	0.000296	146.162	0.330579	1254
Dibenzothiophene	6.8e-05	0.252255	0.025294	4e-06	0.0164535	0.000129	1255
Dibenzyl_ether	1.6e-05	0.265319	0.036068	1e-06	0.0696352	0.001787	1256
Dibromodifluoromethane	0.000993	0.173804	0.011205	0.000152	0.00575566	5.5e-05	1257
Dibromomethane	0.010216	1.39679	0.052631	0.001837	0.160899	0.000283	1258
Dibutyl_maleate	5e-06	0.356496	0.077119	0	0.119568	0.007871	1259
Dibutyl_oxalate	3.9e-05	0.591326	0.110973	6e-06	0.360894	0.029066	1260
Dibutyl_sebacate	0	0.316109	0.126824	0	0.299624	0.089437	1261
Dibutyl_terephthalate	1e-06	0.232363	0.061992	0	0.0745046	0.006595	1262
Dichlorethanoic_acid	0.11988	1.51102	0.795703	0.048386	8.21251	0.760407	1263
Dichloroacetaldehyde	0.018854	2.56124	0.15606	0.00311	0.905678	0.004943	1264
Dichloroacetyl_chloride	0.001481	0.696056	0.035544	0.000193	0.0732916	0.000221	1265
Dichlorodiethylsilane	8.2e-05	0.139997	0.0149	6e-06	0.00528219	6.7e-05	1266
Dichlorodifluoromethane	0.001379	0.131912	0.0086	0.000236	0.00291399	3.9e-05	1267
Dichlorofluoromethane	0.008599	1.35323	0.043634	0.001764	0.201351	0.000269	1268
Dichloroformoxine	0.016962	3.53994	0.22117	0.007292	35.7617	0.210201	1269
Dichloromethane	0.019976	1.83998	0.064189	0.004223	0.244657	0.00033	1270
Dichlorosilane	0.001716	0.176957	0.011131	0.0003	0.00480439	5.2e-05	1271
Dicumyl_peroxide	1e-06	0.169824	0.036924	0	0.0710794	0.005437	1272
Dicyandiamide.coskf	miscible	#VALUE!	#VALUE!	miscible	#VALUE!	#VALUE!	1273
Dicyclohexylamine	7e-06	0.316677	0.121123	1e-06	0.362789	0.210065	1274
Dicyclohexyl_sulfide	3e-06	0.0948547	0.017081	0	0.00406848	8.9e-05	1275
Dicyclopentadiene	0.000128	0.137544	0.014654	1.1e-05	0.00493425	6.8e-05	1276
Diethanolamine.coskf	miscible	#VALUE!	#VALUE!	miscible	#VALUE!	#VALUE!	1277
Diethyl_adipate	0.00015	0.939771	0.1899	9.4e-05	0.820272	0.094722	1278
Diethylaluminum_chloride	0.000763	1.31794	0.067189	6.5e-05	0.309676	0.000742	1279
Diethyl_carbonate	0.003237	1.35308	0.149295	0.00122	0.655265	0.02472	1280
Diethyl_disulfide	0.000255	0.268341	0.022461	2.3e-05	0.0139813	0.000117	1281
Diethylene_glycol.coskf	miscible	#VALUE!	#VALUE!	miscible	#VALUE!	#VALUE!	1282
Diethylene_glycol_diethyl_ether	0.000139	0.820155	0.168352	0.000138	1.10006	0.236904	1283
Diethylene_glycol_dimethyl_ether	0.001522	1.48025	0.237807	0.002452	1.95602	0.328206	1284
Diethylene_glycol_di-n-butyl_ether	2e-06	0.362279	0.109731	1e-06	0.402903	0.126048	1285
Diethylene_glycol_ethyl_ether_acetate.coskf	0.000411	1.16706	0.210896	0.000396	1.25759	0.162445	1286
Diethylene_glycol_monobutyl_ether_acetate.coskf	5.7e-05	0.758436	0.165043	3.5e-05	0.777711	0.119979	1287
Diethylene_glycol_monopropyl_ether	0.001878	1.84602	0.379979	0.00461	2.15804	0.655601	1288
Diethylenetriamine.coskf	miscible	#VALUE!	#VALUE!	miscible	#VALUE!	#VALUE!	1289
Diethylethanolamine	0.003879	1.62683	0.363395	0.001569	1.3987	0.400975	1290
Diethyl_maleate	0.001596	1.33802	0.216771	0.000769	0.855181	0.058468	1291
Diethyl_malonate	0.001474	1.35273	0.189028	0.000518	0.700555	0.0327	1292
Diethyl_oxalate	0.003418	1.7466	0.240462	0.001376	1.76998	0.136267	1293
Diethyl_phthalate	0.000188	0.768941	0.149842	5.4e-05	0.453379	0.036597	1294
Diethyl_succinate	0.000739	1.20674	0.193839	0.000377	0.768244	0.052386	1295
Diethyl_sulfate	0.000986	0.804787	0.067319	8.3e-05	0.0911803	0.000715	1296
Diethyl_sulfide	0.001026	0.411142	0.028509	0.000131	0.0251064	0.000168	1297
Diethylsulfite	0.002818	1.31616	0.146035	0.000773	0.419743	0.0103	1298
Difluoromethane	0.164599	2.38384	0.188243	0.027037	0.730231	0.000871	1299
Difluoromethyl_methyl_ether	0.023041	2.01417	0.090759	0.004309	0.335514	0.000876	1300
Difluoromethyl_trifluoromethyl_ether.coskf	0.003176	1.16254	0.041007	0.000532	0.225742	0.000294	1301
Diglycolic_acid.coskf	miscible	#VALUE!	#VALUE!	miscible	#VALUE!	#VALUE!	1302
Dihexyl_adipate	0	0.249392	0.090387	0	0.14701	0.027165	1303
Diiodomethane	0.003324	0.703853	0.032879	0.00049	0.0598197	0.000179	1304
Diisobutylaluminum_chloride	1.8e-05	0.322815	0.033364	1e-06	0.0430032	0.000254	1305
Diisobutylamine	2e-05	0.183564	0.037107	2e-06	0.236463	0.072379	1306
Diisobutyl_ether	2.2e-05	0.128131	0.0215	2e-06	0.0293693	0.00264	1307
Diisobutyl_ketone	9.2e-05	0.423357	0.078492	2.1e-05	0.31548	0.045565	1308
Diisobutyl_phthalate	1e-06	0.310525	0.082459	0	0.122964	0.011469	1309
Diisodecyl_phthalate	0	0.0983628	0.049314	0	0.0343391	0.006906	1310
Diisononyl_phthalate	0	0.09878	0.044824	0	0.0281283	0.004497	1311
Diisooctyl_phthalate	0	0.125494	0.052639	0	0.0443347	0.007213	1312
Diisopentylsulfide	2e-06	0.107765	0.017793	0	0.00481761	9.2e-05	1313
Diisopropanolamine	0.007188	2.06367	0.506099	0.007227	1.99803	0.646634	1314
Diisopropylamine	0.00056	1.04075	0.227019	0.000165	1.23553	0.317146	1315
Diisopropyl_ether	0.000653	0.805338	0.143541	0.000275	1.02906	0.286167	1316
Diisopropyl_ketone	0.001254	0.989519	0.151282	0.000758	0.985347	0.129569	1317
Diisopropyl_sulfide	0.000246	0.266707	0.025613	2.2e-05	0.0155124	0.00015	1318
Diketene	0.028502	2.28208	0.183772	0.004546	0.565104	0.004571	1319
Dilactic_acid.coskf	miscible	#VALUE!	#VALUE!	miscible	#VALUE!	#VALUE!	1320
Dilactide	0.024915	2.05068	0.383411	0.005566	1.16849	0.052726	1321
Dimercaptoethyl_ether	0.001279	1.1576	0.113765	0.000193	0.741309	0.024851	1322
Dimethoxymethane	0.049614	2.40162	0.4409	miscible	#VALUE!	#VALUE!	1323
Dimethyl_1,4-cyclohexanedicarboxylate.coskf	0.000664	1.12223	0.207929	0.000418	0.831825	0.076104	1324
Dimethyl_2,6-naphthalenedicarboxylate.coskf	6e-05	0.620646	0.119655	1e-05	0.284362	0.017963	1325
Dimethyl_adipate	0.001315	1.43881	0.239921	0.000925	1.10938	0.090612	1326
Dimethyl_carbonate	0.033917	2.29755	0.269164	0.012588	1.14872	0.028882	1327
Dimethylchlorosilane	0.001188	0.304213	0.019028	0.000167	0.0143133	9.6e-05	1328
Dimethyldichlorosilane	0.000696	0.333627	0.022262	8e-05	0.0189269	0.000113	1329
Dimethyldimethoxysilane	0.002392	1.44005	0.23274	0.002324	1.96588	0.421514	1330
Dimethyl_disulfide	0.00511	0.95762	0.053754	0.000652	0.080147	0.0003	1331
Dimethylethanolamine	0.039668	2.0159	0.644339	0.031373	1.85369	0.723323	1332
Dimethyl_isophthalate	0.001865	1.47602	0.25224	0.000851	0.986586	0.071178	1333
Dimethyl-isosorbide	0.016669	2.28125	0.625958	miscible	#VALUE!	#VALUE!	1334
Dimethylketene	0.003281	0.469459	0.024797	0.000539	0.0258049	0.000136	1335
Dimethyl_maleate	0.00984	1.99933	0.302213	0.004973	1.20757	0.064129	1336
Dimethylmalonate	0.015783	2.14041	0.321563	0.006104	1.19659	0.051185	1337
Dimethyl_oxalate	0.033735	2.27755	0.383678	0.01164	1.78843	0.089002	1338
Dimethyl_phthalate	0.00104	1.15209	0.184149	0.00033	0.643558	0.037897	1339
Dimethyl_silane	0.001415	0.16446	0.010266	0.000236	0.0043539	4.8e-05	1340
Dimethyl_succinate	0.008402	2.04841	0.319952	0.00654	1.52984	0.108815	1341
Dimethyl_sulfate	0.008648	1.53304	0.105081	0.000911	0.184788	0.000984	1342
Dimethyl_sulfide	0.01314	1.12146	0.053853	0.002562	0.091605	0.000294	1343
Dimethyl_sulfoxide.coskf	miscible	#VALUE!	#VALUE!	miscible	#VALUE!	#VALUE!	1344
Dimethyl_terephthalate	0.000342	0.841027	0.127798	7.8e-05	0.342722	0.015493	1345
Di-n-butyl_ether	4e-05	0.357276	0.081737	1e-05	0.40524	0.147737	1346
Di-n-butyl_phthalate	1e-06	0.302433	0.07847	0	0.113148	0.009481	1347
Di-n-butyl_sulfate	1.3e-05	0.285806	0.040184	0	0.0308173	0.000471	1348
Di-n-butyl_sulfide	1.2e-05	0.144225	0.019163	1e-06	0.00692255	0.000105	1349
Di-n-butyl_sulfone	0.000581	1.12044	0.198753	0.000293	0.665388	0.050946	1350
Di-n-decyl_phthalate	0	0.0906477	0.046794	0	0.0264446	0.005256	1351
Di-n-heptyl_phthalate	0	0.147791	0.056334	0	0.0472563	0.006379	1352
Di-n-hexyl_ether	1e-06	0.172684	0.05946	0	0.175052	0.100577	1353
Di-n-hexyl_phthalate	0	0.193562	0.067811	0	0.0729081	0.009485	1354
Dinitrogen_pentoxide	0.005196	0.812591	0.029334	0.000927	0.076105	0.000166	1355
Dinitrogen_tetroxide	0.016133	2.1151	0.063944	0.00339	0.376869	0.000368	1356
Dinitrogen_trioxide	0.041152	2.31737	0.104175	0.007295	0.351631	0.000663	1357
Di-n-nonyl_phthalate	0	0.103696	0.048472	0	0.0305657	0.00531	1358
Di-n-octylamine	0	0.232246	0.154603	0	0.248039	0.261998	1359
Di-n-octyl_ether	0	0.101046	0.045573	0	0.0881654	0.066071	1360
Di-n-octyl_sulfide	0	0.0480953	0.013702	0	0.001616	5.9e-05	1361
Di-n-octyl_terephthalate	0	0.113888	0.048402	0	0.0390977	0.00649	1362
Dinonyl_ether	0	0.0807443	0.040632	0	0.0671594	0.057322	1363
Dinonylphenol	0	0.242597	0.084463	0	1.88934	0.092608	1364
Di-n-pentyl_ether	4e-06	0.238402	0.069796	1e-06	0.262406	0.130244	1365
Di-n-propyl_disulfide	3.1e-05	0.162375	0.018634	2e-06	0.00739851	9.2e-05	1366
Di-n-propyl_phthalate	1.1e-05	0.429394	0.098168	1e-06	0.211515	0.018792	1367
Di-n-propyl_sulfide	0.000119	0.228847	0.022674	9e-06	0.0123038	0.00013	1368
Di-n-propyl_sulfone	0.00609	1.84032	0.306555	0.005271	1.21198	0.091911	1369
Di-n-undecyl_phthalate	0	0.0711333	0.039291	0	0.0203953	0.004539	1370
Dioctyl_adipate	0	0.162955	0.073663	0	0.0865315	0.020287	1371
Dioctyl_phthalate	0	0.136732	0.060866	0	0.0611678	0.012938	1372
Diolein	0	0.103987	0.081761	0	0.0573018	0.032698	1373
Diphenylacetylene	1.6e-05	0.215588	0.024102	1e-06	0.0135443	0.00012	1374
Diphenylamine	0.000243	1.35135	0.107787	3.4e-05	36.0059	0.099707	1375
Diphenyldichlorosilane	4e-06	0.148703	0.021032	0	0.00847212	0.000101	1376
Diphenyl_disulfide	1.3e-05	0.197738	0.024402	0	0.0125167	0.000122	1377
Diphenyl_ether	5.8e-05	0.276256	0.026915	3e-06	0.0193553	0.000143	1378
Diphenylglyoxal	8.1e-05	0.513242	0.077876	7e-06	0.172986	0.006434	1379
Diphenylmethane-4,4'-diisocyanate	3e-06	0.203313	0.028756	0	0.0143242	0.000152	1380
Diphenylmethane	3.9e-05	0.22518	0.024995	2e-06	0.0133231	0.000126	1381
Diphenylmethanone	0.00023	0.711182	0.113716	4.8e-05	0.542181	0.045083	1382
Diphenyl-sulfone	0.000278	0.761816	0.117919	3.7e-05	0.263142	0.0095	1383
Dipropylene_glycol	0.01487	2.14682	0.557604	0.017285	1.94903	0.703303	1384
Dipropylene_glycol_monoethyl_ether	0.005218	2.06234	0.647459	0.008236	1.7955	0.839828	1385
Dipropylene_glycol_monomethyl_ether_acetate.coskf	0.000252	1.01568	0.206851	0.000237	1.23897	0.206476	1386
Dipropylene_glycol-monomethyl_ether	0.003093	1.71728	0.379136	0.00309	1.73689	0.492466	1387
Dipropylene_glycol_n-butyl_ether	0.000138	1.16081	0.331256	0.000177	1.6598	0.61556	1388
Dipropylene_glycol_n-propyl_ether	0.000375	1.31361	0.334062	0.000505	1.84246	0.607584	1389
Dipropylene_glycol_t-butyl_ether	0.000535	1.32345	0.370749	0.000799	1.76268	0.665583	1390
Dipropyl_maleate	0.000159	0.745847	0.142263	4.5e-05	0.419326	0.032903	1391
Di-sec-butyl_ether	9.7e-05	0.530187	0.13489	3.3e-05	0.690607	0.303238	1392
Disilane	0.000641	0.0525451	0.005503	9.4e-05	0.000523089	2.1e-05	1393
Di-tert-butyl_disulfide	1.8e-05	0.125481	0.017724	1e-06	0.00540207	8.5e-05	1394
Di-tert-butyl_ether	0.000163	0.476211	0.112383	4.8e-05	0.644218	0.25356	1395
Di-tert-butyl_peroxide	7.7e-05	0.308936	0.06029	1.7e-05	0.274357	0.059584	1396
Di-tert-butyl_sulfide	6.6e-05	0.179168	0.02226	4e-06	0.00958782	0.000127	1397
Diuron	0.000191	1.02994	0.191772	3.1e-05	0.859211	0.122859	1398
Divinyl_ether	0.007138	1.23953	0.056354	0.001056	0.135135	0.000362	1399
Dl-aspartic_acid.coskf	miscible	#VALUE!	#VALUE!	miscible	#VALUE!	#VALUE!	1400
Dl-glutamic_acid.coskf	miscible	#VALUE!	#VALUE!	miscible	#VALUE!	#VALUE!	1401
d-Limonene	4.1e-05	0.120036	0.015008	2e-06	0.00434598	6.9e-05	1402
Docosane	0	0.0175345	0.007673	0	0.000262812	2.1e-05	1403
Dodecamethylcyclohexasiloxane	0	0.064375	0.025713	0	0.0167873	0.002287	1404
Dodecamethylpentasiloxane	0	0.0438007	0.01722	0	0.00774275	0.000974	1405
Dodecanal	3e-06	0.262238	0.06409	0	0.147918	0.02247	1406
Dodecane	0	0.03067	0.007247	0	0.000466568	2.3e-05	1407
Dodecanedioic_acid	0.000136	1.44921	0.357998	3.6e-05	2.50444	0.353126	1408
Eicosamethylnonasiloxane	0	0.0483991	0.035124	0	0.050852	0.028938	1409
Eicosane	0	0.0190331	0.007574	0	0.000285131	2.1e-05	1410
Ephedrine	0.000367	0.897505	0.15571	0.000115	1.11724	0.167394	1411
epsilon-Caprolactam.coskf	miscible	#VALUE!	#VALUE!	miscible	#VALUE!	#VALUE!	1412
epsilon-Caprolactone	0.076168	1.72511	0.705526	miscible	#VALUE!	#VALUE!	1413
Erucic_acid	0	0.227789	0.092785	0	0.384615	0.066584	1414
Estradiol_benzoate	0	0.285367	0.106848	0	0.208587	0.058301	1415
Estradiol	6.1e-05	0.914147	0.240537	6e-06	1.16882	0.142375	1416
Estriol	0.000268	1.27726	0.368071	4.4e-05	1.43086	0.262988	1417
Estrone	0.000102	0.872107	0.242054	1.7e-05	0.731986	0.154271	1418
Ethanamine.coskf	miscible	#VALUE!	#VALUE!	miscible	#VALUE!	#VALUE!	1419
Ethane	0.009721	0.188619	0.008117	0.002667	0.00349741	3.9e-05	1420
Ethanesulfonyl_chloride	0.006455	1.40126	0.083696	0.000686	0.172595	0.000701	1421
Ethanol.coskf	miscible	#VALUE!	#VALUE!	miscible	#VALUE!	#VALUE!	1422
Ethene	0.03801	0.877128	0.02945	0.010382	0.0561687	0.000146	1423
Ethinyl-estradiol	2.6e-05	0.981678	0.21429	2e-06	2.32265	0.14275	1424
Ethisterone	4.8e-05	0.792804	0.304643	2.3e-05	0.938	0.397586	1425
Ethoxyethane	0.004282	1.36993	0.177277	0.003002	1.6776	0.333437	1426
Ethyl_3-ethoxypropionate	0.000739	1.14167	0.177821	0.000505	1.14884	0.126614	1427
Ethyl_4-hydroxybenzoate	0.001939	2.27617	0.347462	0.000597	3.81875	0.302223	1428
Ethyl_acetate	0.017716	2.31978	0.295039	0.016525	2.22662	0.19752	1429
Ethyl_acetoacetate	0.014916	2.19505	0.375131	0.010288	1.83172	0.148575	1430
Ethyl_acrylate	0.005616	1.55149	0.165214	0.002575	0.955958	0.04415	1431
Ethylal	0.006228	2.18561	0.35249	0.009951	2.39592	0.652243	1432
Ethyl_aluminum_dichloride	0.005493	5.18614	0.175329	0.000645	5.05929	0.004055	1433
Ethylbenzene	0.000337	0.235993	0.018958	3.4e-05	0.0108925	9.4e-05	1434
Ethylbenzene_hydroperoxide	0.004222	2.42582	0.29397	0.001096	5.88871	0.223493	1435
Ethyl_benzoate	0.000353	0.662482	0.087471	7.6e-05	0.283619	0.013596	1436
Ethyl_chloroacetate	0.006516	1.81059	0.177986	0.001486	1.14967	0.036175	1437
Ethyl_chloroformate	0.00323	0.825793	0.049277	0.000457	0.0939507	0.000545	1438
Ethyl_cyanoacetate	0.018612	2.24159	0.321249	0.003324	0.965388	0.026164	1439
Ethylcyclohexane	3.5e-05	0.0476112	0.006913	2e-06	0.000690005	2.5e-05	1440
Ethylcyclopentane	8.1e-05	0.0572054	0.007116	7e-06	0.000870302	2.7e-05	1441
Ethyl_decanoate	2e-06	0.231998	0.058411	0	0.108662	0.014882	1442
Ethyl_dodecanoate	0	0.168945	0.050639	0	0.0777333	0.013585	1443
Ethylene_carbonate.coskf	miscible	#VALUE!	#VALUE!	0.032706	1.3153	0.048058	1444
Ethylenediaminetetraacetic_acid	0.016541	1.58446	0.61063	0.003249	1.66055	0.334636	1445
Ethylene_glycol_2-ethylhexyl_ether	4.4e-05	0.611008	0.161761	7e-06	0.358055	0.125231	1446
Ethylene_glycol_diacetate	0.007319	2.06547	0.32337	0.005899	1.64505	0.126214	1447
Ethylene_glycol_diacrylate	0.000864	1.2108	0.1697	0.00023	0.573976	0.024939	1448
Ethylene_glycol_dinitrate	0.002971	1.53937	0.084467	0.0002	0.210584	0.00058	1449
Ethylene_glycol_monobutyl_ether_acetate.coskf	0.000271	0.915759	0.158623	0.000154	0.86224	0.103028	1450
Ethylene_glycol_monopropyl_ether	0.011094	2.19923	0.452327	0.008411	1.93066	0.514362	1451
Ethyl_erucate	0	0.070748	0.033369	0	0.0214958	0.004883	1452
Ethyl_fluoride	0.036619	1.50458	0.069779	0.008616	0.152722	0.000421	1453
Ethyl_formate	0.052803	2.40213	0.344613	0.026364	1.86009	0.082669	1454
Ethyl_hexadecanoate	0	0.101835	0.039519	0	0.0383466	0.008374	1455
Ethyl_hexanoate	0.00012	0.55611	0.093111	3.2e-05	0.345978	0.033072	1456
Ethyl_hydroperoxide.coskf	miscible	#VALUE!	#VALUE!	miscible	#VALUE!	#VALUE!	1457
Ethylidene_diacetate	0.003753	1.5874	0.206461	0.001224	0.848379	0.035352	1458
Ethyl_iodide	0.005114	0.563369	0.026897	0.000884	0.0329132	0.000139	1459
Ethyl_isoamyl_ketone	0.000493	0.956692	0.174334	0.00029	1.2076	0.236349	1460
Ethyl_isobutyl_ether	0.00037	0.542203	0.090675	0.000142	0.63446	0.163012	1461
Ethyl_isobutyrate	0.001353	1.03954	0.138257	0.000708	0.81593	0.069907	1462
Ethyl_isopropyl_ether	0.00162	1.07332	0.163555	0.001018	1.35787	0.325048	1463
Ethyl_isopropyl_ketone	0.00329	1.40583	0.196181	0.002334	1.62531	0.217563	1464
Ethyl_isovalerate	0.00045	0.727647	0.106403	0.000164	0.473446	0.039754	1465
Ethyl_lactate	0.014933	2.3146	0.414515	0.016246	2.31959	0.396863	1466
Ethyl_levulinate	0.009832	2.20983	0.423104	0.023915	2.25945	0.456856	1467
Ethyl_linoleate	0	0.118844	0.042025	0	0.0419916	0.006231	1468
Ethyl_linolenate	0	0.149407	0.049415	0	0.0604498	0.007903	1469
Ethyl_mercaptan	0.010632	1.03577	0.047006	0.001993	0.0814871	0.000257	1470
Ethyl_methacrylate	0.001511	1.03721	0.125351	0.000635	0.673927	0.043352	1471
Ethyl_methyl_disulfide	0.001064	0.437212	0.028701	0.000124	0.0275627	0.000155	1472
Ethyl_n-butyrate	0.001355	1.1008	0.143615	0.000691	0.871367	0.070859	1473
Ethyl_n-hexyl_ether	4.1e-05	0.370573	0.084721	1.1e-05	0.421707	0.152203	1474
Ethyl_n-octyl_sulfide	1e-06	0.100963	0.017151	0	0.00439015	8.7e-05	1475
Ethyl_nonanoate	4e-06	0.283651	0.06603	1e-06	0.152822	0.020592	1476
Ethylnorbornene	7.6e-05	0.09721	0.011211	6e-06	0.00271533	5e-05	1477
Ethyl_n-pentyl_sulfide	3.3e-05	0.173545	0.020261	2e-06	0.00872284	0.000114	1478
Ethyl_octanoate	1.3e-05	0.34154	0.07195	2e-06	0.19223	0.023472	1479
Ethyl_oleate	0	0.0975861	0.040073	0	0.0421133	0.010034	1480
Ethyl_p-aminobenzoate	0.002224	1.99201	0.306429	0.000562	2.35559	0.169018	1481
Ethyl_pentanoate	0.000376	0.75158	0.110011	0.000136	0.499964	0.041772	1482
Ethyl_phenyl_acetate	0.000331	0.778327	0.109591	6.7e-05	0.439876	0.024085	1483
Ethyl_propanoate	0.004562	1.52177	0.180176	0.002758	1.26912	0.091579	1484
Ethyl_propyl_disulfide	0.000105	0.215447	0.020736	7e-06	0.0108644	0.000107	1485
Ethyl_propyl_ether	0.001285	0.93391	0.137339	0.000743	1.15534	0.259136	1486
Ethyl_propyl_sulfide	0.000327	0.307348	0.025895	3.3e-05	0.0179184	0.000152	1487
Ethyl_tert-butyl_disulfide	7.2e-05	0.168087	0.018772	5e-06	0.00767063	9.3e-05	1488
Ethyl-tert-butyl_sulfide	0.000211	0.242209	0.023507	1.9e-05	0.0132474	0.000134	1489
Ethyl_tert-pentyl_ether	0.000292	0.610707	0.126383	0.000123	0.802443	0.272351	1490
Ethyl_tetradecanoate	0	0.129924	0.044798	0	0.054263	0.010638	1491
Ethylthioethanol	0.01357	2.52563	0.394548	0.004649	2.7141	0.24907	1492
Ethyl_thiolacetate	0.005351	1.43941	0.153898	0.002142	0.867062	0.0399	1493
Ethyltrichlorosilane	0.000117	0.119473	0.011875	1e-05	0.0038361	5.3e-05	1494
Ethyl_trimethyl_acetate	0.000547	0.691283	0.104064	0.000206	0.512641	0.051834	1495
Ethyl_undecanoate	1e-06	0.197755	0.054369	0	0.0906252	0.01383	1496
Ethyl_vanillin	0.001759	1.60565	0.264554	0.000574	1.43052	0.159647	1497
Ethyl_vinyl_ether	0.005825	1.09916	0.07293	0.001302	0.316821	0.00497	1498
Ethynylbenzene	0.001227	0.679443	0.039	0.000132	0.0625851	0.000224	1499
Fentanyl	2e-06	0.645241	0.266666	1e-06	1.16587	0.47979	1500
Fluoranthene	2.3e-05	0.205619	0.024131	1e-06	0.0128137	0.00012	1501
Fluorene	8.1e-05	0.258802	0.026074	4e-06	0.016042	0.000133	1502
Fluorine	0.059732	0.267418	0.008411	0.020857	0.0057517	4.4e-05	1503
Fluorobenzene	0.002496	0.563526	0.029206	0.000355	0.0392544	0.000154	1504
Fluosulfonic_acid.coskf	miscible	#VALUE!	#VALUE!	miscible	#VALUE!	#VALUE!	1505
Flurbiprofen	8.7e-05	1.4859	0.223574	1.1e-05	7.70316	0.229037	1506
Formaldehyde.coskf	miscible	#VALUE!	#VALUE!	miscible	#VALUE!	#VALUE!	1507
Formamide.coskf	miscible	#VALUE!	#VALUE!	miscible	#VALUE!	#VALUE!	1508
Formanilide	0.022285	2.68588	0.499619	0.007245	4.09028	0.311287	1509
Formic_acid.coskf	miscible	#VALUE!	#VALUE!	miscible	#VALUE!	#VALUE!	1510
Fumaric_acid.coskf	miscible	#VALUE!	#VALUE!	miscible	#VALUE!	#VALUE!	1511
Fumaronitrile	0.085321	2.08455	0.45088	0.007122	0.976407	0.013521	1512
Furan_2,5-dicarboxylic_acid.coskf	miscible	#VALUE!	#VALUE!	miscible	#VALUE!	#VALUE!	1513
Furan	0.016911	1.45094	0.061646	0.003242	0.160946	0.000349	1514
Furfural	0.163142	1.31672	0.686954	0.086937	2.07984	0.546941	1515
Furfuryl_alcohol	0.04623	2.4765	0.525653	0.016044	3.4989	0.349153	1516
gamma-Aminopropyltriethoxysilane	3e-05	0.87846	0.275366	1.7e-05	1.32267	0.449132	1517
gamma-Butyrolactone.coskf	miscible	#VALUE!	#VALUE!	miscible	#VALUE!	#VALUE!	1518
gamma-Terpinene	2.6e-05	0.103859	0.013318	1e-06	0.00336726	5.9e-05	1519
gamma-Valerolactone	0.068174	2.06368	0.548644	0.094848	1.96074	0.431892	1520
Ganciclovir.coskf	miscible	#VALUE!	#VALUE!	miscible	#VALUE!	#VALUE!	1521
GB	0.009837	2.39128	0.421045	0.017683	2.45073	0.678685	1522
Germanium_tetrachloride	0.000172	0.108788	0.009562	1.7e-05	0.00318732	4.1e-05	1523
Germanium_tetrafluoride	0.019461	3.76053	0.099053	0.004144	1.5033	0.00098	1524
Germanium_tetrahydride	0.016931	0.198234	0.007456	0.005149	0.00330947	3.6e-05	1525
GF	0.001186	1.4443	0.275035	0.001246	1.90273	0.391294	1526
Glutamic_acid.coskf	miscible	#VALUE!	#VALUE!	miscible	#VALUE!	#VALUE!	1527
Glutaraldehyde.coskf	miscible	#VALUE!	#VALUE!	miscible	#VALUE!	#VALUE!	1528
Glutaric_acid.coskf	miscible	#VALUE!	#VALUE!	miscible	#VALUE!	#VALUE!	1529
Glutaric_anhydride	0.10242	1.65521	0.546219	0.015923	1.16104	0.047013	1530
Glutaronitrile.coskf	miscible	#VALUE!	#VALUE!	0.025603	1.41364	0.136133	1531
Glycerol.coskf	miscible	#VALUE!	#VALUE!	miscible	#VALUE!	#VALUE!	1532
Glycerol_tricaprylate	0	0.147917	0.076907	0	0.0726159	0.016509	1533
Glyceryl_triacetate	0.00167	1.59005	0.31672	0.000949	1.12324	0.099535	1534
Glycol_aldehyde.coskf	miscible	#VALUE!	#VALUE!	miscible	#VALUE!	#VALUE!	1535
Glycolic_acid.coskf	miscible	#VALUE!	#VALUE!	miscible	#VALUE!	#VALUE!	1536
Glyoxal.coskf	miscible	#VALUE!	#VALUE!	0.028465	0.961322	0.010699	1537
Guaiacol	0.002922	1.62472	0.128574	0.00058	4.23903	0.055968	1538
Haloperidol	1e-06	0.511975	0.186496	0	0.526049	0.151801	1539
Halothane	0.001087	0.587427	0.029082	0.00015	0.0712733	0.000188	1540
Heptadecane	0	0.0218293	0.007413	0	0.000326015	2.1e-05	1541
Heptafluoropropyl_methyl_ether	0.000134	0.169914	0.015248	1.2e-05	0.00783536	7.4e-05	1542
Heptanal	0.000684	0.885746	0.123741	0.000249	0.682595	0.061188	1543
Heptane	2.6e-05	0.0528921	0.00718	2e-06	0.000821705	2.6e-05	1544
Hexachloro-1,3-butadiene	1e-05	0.0668815	0.009838	0	0.00172602	4e-05	1545
Hexachlorobenzene	7e-06	0.068561	0.010639	0	0.00183903	4.3e-05	1546
Hexachlorocyclopentadiene	9e-06	0.0703678	0.010508	0	0.00192443	4.3e-05	1547
Hexachloroethane	7.6e-05	0.105481	0.011973	6e-06	0.00340388	5.2e-05	1548
Hexadecamethylheptasiloxane	0	0.0383781	0.020594	0	0.00706018	0.001143	1549
Hexadecane	0	0.0231344	0.007378	0	0.00034719	2.2e-05	1550
Hexaethylbenzene	0	0.0449263	0.011605	0	0.0012251	4.5e-05	1551
Hexafluoro-1,3-butadiene	0.000221	0.106828	0.009493	2.4e-05	0.00258298	4.1e-05	1552
Hexafluoroacetone	0.000422	0.192458	0.013758	5.1e-05	0.00952112	6.9e-05	1553
Hexafluorobenzene	0.000158	0.142405	0.013028	1.5e-05	0.00482712	5.8e-05	1554
Hexafluoroethane	0.000769	0.104361	0.007774	0.000114	0.00224977	3.4e-05	1555
Hexafluoropropylene	0.000434	0.124449	0.009546	5.6e-05	0.00326349	4.4e-05	1556
Hexahydroindan	2.9e-05	0.0449041	0.006894	2e-06	0.000643773	2.5e-05	1557
Hexamethylbenzene	1e-05	0.0912954	0.013829	0	0.00303243	6.1e-05	1558
Hexamethylcyclotrisiloxane	1.7e-05	0.28288	0.056992	2e-06	0.132504	0.012413	1559
Hexamethyldisilazane	1.1e-05	0.129436	0.019626	1e-06	0.0549447	0.002129	1560
Hexamethyldisiloxane	1e-05	0.116997	0.019799	1e-06	0.0280043	0.001868	1561
Hexamethylenediamine	0.006567	2.54079	0.661747	0.006612	2.78632	0.780181	1562
Hexamethyleneimine	0.001049	1.01754	0.208739	0.000344	1.14696	0.303224	1563
Hexamethylenetetramine.coskf	miscible	#VALUE!	#VALUE!	miscible	#VALUE!	#VALUE!	1564
Hexamethyl_phosphoramide	0.001206	1.83981	0.559287	0.001468	1.71838	0.767537	1565
Hexanal	0.00209	1.26459	0.158586	0.001078	1.17466	0.106777	1566
Hexanamide	0.012092	2.11113	0.567244	0.005838	1.79285	0.536337	1567
Hexane	7.4e-05	0.0612207	0.007163	6e-06	0.000950281	2.7e-05	1568
Hexanenitrile	0.003273	1.46634	0.16649	0.001033	0.862152	0.038818	1569
Hexyl_acetate	0.000168	0.66306	0.111494	5.4e-05	0.4837	0.051109	1570
Hexylene_glycol	0.006716	1.83364	0.414397	0.004282	1.65793	0.499814	1571
Hydracrylonitrile.coskf	miscible	#VALUE!	#VALUE!	miscible	#VALUE!	#VALUE!	1572
Hydrazine.coskf	miscible	#VALUE!	#VALUE!	miscible	#VALUE!	#VALUE!	1573
Hydrazobenzene	0.00059	4.09076	0.30069	0.000164	123.243	0.427145	1574
Hydrocortisone_acetate	9.2e-05	0.938543	0.385847	3.8e-05	0.894108	0.316966	1575
Hydrocortisone	0.000353	1.12011	0.453912	0.000237	1.12122	0.468183	1576
Hydrogen_bromide.coskf	miscible	#VALUE!	#VALUE!	0.068009	2.0575	0.001611	1577
Hydrogen_chloride.coskf	miscible	#VALUE!	#VALUE!	0.141975	4.32594	0.005061	1578
Hydrogen	0.494349	0.460107	0.016377	0.240173	0.0224227	8.5e-05	1579
Hydrogen_cyanide.coskf	miscible	#VALUE!	#VALUE!	0.223528	2.66488	0.053628	1580
Hydrogen_fluoride.coskf	miscible	#VALUE!	#VALUE!	miscible	#VALUE!	#VALUE!	1581
Hydrogen_iodide	0.071276	1.80876	0.061701	0.01901	0.278513	0.00029	1582
Hydrogen_peroxide.coskf	miscible	#VALUE!	#VALUE!	miscible	#VALUE!	#VALUE!	1583
Hydrogen_selenide.coskf	miscible	#VALUE!	#VALUE!	0.074956	0.418632	0.00098	1584
Hydrogen_sulfide	0.398496	1.3753	0.358583	0.049706	0.585754	0.001055	1585
Hydromorphinone	0.000293	1.03648	0.289388	7.1e-05	0.909825	0.192101	1586
Hydroxyacetonitrile.coskf	miscible	#VALUE!	#VALUE!	miscible	#VALUE!	#VALUE!	1587
Hydroxylamine.coskf	miscible	#VALUE!	#VALUE!	miscible	#VALUE!	#VALUE!	1588
Hydroxypivalyl_hydroxypivalate	0.000749	1.37251	0.350111	0.000925	1.83599	0.585922	1589
Hypochlorous_acid.coskf	miscible	#VALUE!	#VALUE!	miscible	#VALUE!	#VALUE!	1590
Hypophosphorous_acid.coskf	miscible	#VALUE!	#VALUE!	miscible	#VALUE!	#VALUE!	1591
Ibuprofen	6.6e-05	1.11091	0.192894	9e-06	3.47642	0.183351	1592
Indane	0.000229	0.196091	0.017488	2.2e-05	0.00825084	8.4e-05	1731
Indene	0.000574	0.360397	0.026394	5.8e-05	0.0216195	0.000136	1732
Indole	0.008265	5.04313	0.290251	0.004032	143.487	0.360935	1733
Inositol.coskf	miscible	#VALUE!	#VALUE!	miscible	#VALUE!	#VALUE!	1734
Iodine	0.004074	0.348914	0.016433	0.000782	0.0173657	8.5e-05	1735
Iodobenzene	0.000519	0.301301	0.021	5.7e-05	0.0167653	0.000106	1736
Isobutane	0.000947	0.101231	0.007684	0.000148	0.00171937	3.2e-05	1737
Isobutene	0.003432	0.351254	0.018387	0.000605	0.0151035	9.4e-05	1738
Isobutyl_acetate	0.001632	1.1834	0.156499	0.000868	0.960908	0.080999	1739
Isobutyl_acrylate	0.000565	0.75016	0.098717	0.000164	0.371955	0.021235	1740
Isobutylamine	0.010968	2.53999	0.460891	0.007147	3.08446	0.554706	1741
Isobutylbenzene	5.3e-05	0.142477	0.016015	3e-06	0.0056513	7.4e-05	1742
Isobutylchloride	0.001274	0.344096	0.021684	0.000176	0.0173204	0.000112	1743
Isobutylcyclohexane	5e-06	0.0382652	0.007023	0	0.000561697	2.4e-05	1744
Isobutylene_glycol.coskf	miscible	#VALUE!	#VALUE!	miscible	#VALUE!	#VALUE!	1745
Isobutyl_formate	0.004849	1.41902	0.151591	0.001638	0.783244	0.032209	1746
Isobutyl_isobutyrate	0.000152	0.539754	0.094579	4.7e-05	0.374742	0.044305	1747
Isobutyl_isopropyl_ether	0.00013	0.353104	0.066685	3.6e-05	0.400298	0.120529	1748
Isobutyl_mercaptan	0.001105	0.386248	0.025644	0.000141	0.0224414	0.000142	1749
Isobutyl_methacrylate	0.000211	0.566168	0.090018	5.7e-05	0.338053	0.030231	1750
Isobutyl-tert-butyl_ether	7e-05	0.338022	0.077879	1.6e-05	0.428113	0.173328	1751
Isobutyric_acid	0.046033	2.5715	0.551738	0.022604	4.93588	0.473063	1752
Isobutyric_anhydride	0.000416	0.74095	0.103072	8.9e-05	0.261201	0.009816	1753
Isonicotinamide.coskf	miscible	#VALUE!	#VALUE!	miscible	#VALUE!	#VALUE!	1754
Isonicotinic_acid	0.041956	2.24522	0.606447	0.011981	3.95797	0.356245	1755
Isopentyl_acetate	0.000704	0.944539	0.139304	0.000299	0.739714	0.068102	1756
Isopentyl_butyrate	6.4e-05	0.473394	0.088636	1.6e-05	0.295111	0.03265	1757
Isopentyl_isovalerate	2.2e-05	0.335689	0.068567	3e-06	0.165255	0.017808	1758
Isophorone	0.004373	2.02102	0.43189	0.006744	2.16059	0.686985	1759
Isophorone_diisocyanate	8e-06	0.192377	0.028263	0	0.0124669	0.000158	1760
Isophthalic_acid	0.031315	2.63124	0.746922	0.021466	5.52613	0.790256	1761
Isophthaloyl_chloride	0.000128	0.36583	0.036844	8e-06	0.0334244	0.000286	1762
Isopimaric_acid	1e-05	0.536436	0.166345	1e-06	0.566226	0.116123	1763
Isoprene	0.001968	0.382563	0.021326	0.000311	0.0191448	0.000109	1764
Isopropyl_acetate	0.005664	1.63705	0.201943	0.004022	1.46336	0.120111	1765
Isopropyl_acrylate	0.001701	1.10892	0.134746	0.000723	0.780547	0.052866	1766
Isopropyl_butyl_ether	0.000165	0.536987	0.109118	6.2e-05	0.677415	0.223171	1767
Isopropylcyclohexane	1.7e-05	0.0434104	0.007031	1e-06	0.000642361	2.5e-05	1768
Isopropylcyclopentane	3.8e-05	0.0510105	0.007219	3e-06	0.000789225	2.7e-05	1769
Isopropyl_iodide	0.001764	0.386492	0.023027	0.000264	0.0199287	0.000118	1770
Isopropyl_mercaptan	0.003867	0.636964	0.035081	0.000582	0.0435238	0.000199	1771
Isopropyl_myristate	0	0.116684	0.044989	0	0.051924	0.013067	1772
Isoquinoline	0.003616	1.98976	0.327596	0.001574	2.79722	0.432509	1773
Isovaleric_acid	0.012966	2.85507	0.395338	0.006027	5.73205	0.34896	1774
Isoxazole.coskf	miscible	#VALUE!	#VALUE!	0.05362	3.5432	0.291613	1775
Itaconic_acid.coskf	miscible	#VALUE!	#VALUE!	miscible	#VALUE!	#VALUE!	1776
Ketene	0.059696	1.91666	0.074663	0.013337	0.239603	0.000328	1777
Lactic_acid.coskf	miscible	#VALUE!	#VALUE!	miscible	#VALUE!	#VALUE!	1778
Lactonitrile.coskf	miscible	#VALUE!	#VALUE!	miscible	#VALUE!	#VALUE!	1779
L-Aspartic_acid.coskf	miscible	#VALUE!	#VALUE!	miscible	#VALUE!	#VALUE!	1780
Levulinic_acid.coskf	miscible	#VALUE!	#VALUE!	miscible	#VALUE!	#VALUE!	1781
Lidocaine	6e-05	1.003	0.346883	1.4e-05	1.19383	0.416093	1782
Linoleic_acid	0	0.373677	0.111452	0	0.649189	0.076772	1783
Linolenic_acid	0	0.407004	0.115974	0	0.761011	0.080056	1784
L-Menthol	0.000251	0.730678	0.197011	9.4e-05	0.71066	0.30652	1785
L-Phenylalanine	0.005149	2.6354	0.394455	0.001019	6.79776	0.25837	1786
Lysine	0.023709	2.04028	0.661647	0.008412	2.60117	0.481457	1787
Malathion	5e-06	0.431388	0.100158	0	0.259957	0.020666	1788
Maleic_acid.coskf	miscible	#VALUE!	#VALUE!	miscible	#VALUE!	#VALUE!	1789
Maleic_anhydride	0.053007	2.30216	0.2895	0.005376	0.614145	0.00576	1790
Maleonitrile	0.076155	2.21394	0.414551	0.006683	0.945388	0.010783	1791
Malic_acid.coskf	miscible	#VALUE!	#VALUE!	miscible	#VALUE!	#VALUE!	1792
Malonic_acid.coskf	miscible	#VALUE!	#VALUE!	miscible	#VALUE!	#VALUE!	1793
Malononitrile.coskf	miscible	#VALUE!	#VALUE!	0.017482	1.92244	0.026288	1794
m-Anisic_acid	0.005422	2.82326	0.357821	0.001632	8.33401	0.330228	1795
m-Chloroaniline	0.008687	5.28854	0.261701	0.005422	172.265	0.251033	1796
m-Chlorobenzoyl_chloride	0.0002	0.328027	0.028853	1.6e-05	0.0267294	0.000208	1797
m-Chloronitrobenzene	0.001086	0.786734	0.066142	0.000129	0.168324	0.001954	1798
m-Chlorophenol	0.010017	5.82237	0.418738	0.005346	57.6127	0.473053	1799
m-Cresol	0.009388	4.20642	0.359795	0.003909	28.0481	0.356006	1800
m-Cymene	4.7e-05	0.143283	0.016187	3e-06	0.00573249	7.5e-05	1801
m-Dibromobenzene	0.000219	0.267985	0.020792	1.9e-05	0.0159839	0.000107	1802
m-Diethylbenzene	3.9e-05	0.129975	0.015245	2e-06	0.00480838	6.9e-05	1803
m-Diisopropylbenzene	7e-06	0.0998275	0.014612	0	0.00361696	6.4e-05	1804
m-Diisopropylbenzene_hydroperoxide	4.9e-05	1.76152	0.201744	8e-06	36.8338	0.299484	1805
m-Dinitrobenzene	0.002787	1.28405	0.12262	0.000255	0.290867	0.004066	1806
m-Divinylbenzene	0.000188	0.335748	0.027767	1.3e-05	0.0228253	0.000146	1807
Mefenamic_acid	3e-05	1.12128	0.167565	3e-06	9.58727	0.189697	1808
Melamine.coskf	miscible	#VALUE!	#VALUE!	miscible	#VALUE!	#VALUE!	1809
Meperidine	1.6e-05	0.597742	0.179684	3e-06	0.895369	0.252971	1810
Mesitylene	9.5e-05	0.164822	0.016461	7e-06	0.00665025	7.7e-05	1811
Mesityl_oxide	0.005737	1.85122	0.259911	0.004482	2.25964	0.321757	1812
Mestanolone	3.1e-05	0.656454	0.274259	1.7e-05	0.788555	0.409669	1813
Methacetin	0.003861	1.96979	0.367354	0.001136	1.93004	0.252957	1814
Methacrolein	0.033924	2.33654	0.286936	0.019881	2.03602	0.119146	1815
Methacrylic_acid	0.069905	2.33122	0.624614	0.032044	5.75417	0.541743	1816
Methacrylonitrile	0.032749	2.33694	0.251687	0.010497	1.24511	0.030196	1817
Methanamine.coskf	miscible	#VALUE!	#VALUE!	miscible	#VALUE!	#VALUE!	1818
Methane	0.056183	0.355126	0.010789	0.018919	0.0106542	5.8e-05	1819
Methanedienone	0.000142	1.05066	0.423856	0.000165	1.32334	0.656585	1820
Methanesulfonyl_chloride	0.020265	2.3965	0.139037	0.002256	0.405946	0.001156	1821
Methanol.coskf	miscible	#VALUE!	#VALUE!	miscible	#VALUE!	#VALUE!	1822
Metharbital	0.0055	1.81457	0.393001	0.003348	2.30155	0.285732	1823
Methoxyacetic_acid.coskf	miscible	#VALUE!	#VALUE!	miscible	#VALUE!	#VALUE!	1824
Methoxyacetone.coskf	miscible	#VALUE!	#VALUE!	miscible	#VALUE!	#VALUE!	1825
Methoxybenzene	0.001629	0.687812	0.050346	0.000238	0.12213	0.001281	1826
Methoxydihydropyran	0.002884	1.08456	0.110963	0.000902	0.546731	0.021018	1827
Methoxymethane	0.153057	1.68469	0.565918	miscible	#VALUE!	#VALUE!	1828
Methyl-3-mercaptopropionate	0.007548	1.838	0.196378	0.00185	0.98961	0.029898	1829
Methyl_4-dimethylaminobenzoate	0.000353	0.911129	0.152282	0.00012	0.75902	0.07392	1830
Methyl-4-formylbenzoate	0.001927	1.35041	0.185033	0.000611	0.691863	0.03112	1831
Methyl_acetate	0.086512	2.13504	0.478262	0.079203	2.18092	0.279478	1832
Methyl_acetoacetate	0.023337	2.26852	0.362857	0.013176	1.77203	0.109954	1833
Methyl_acrylate	0.019995	2.30158	0.26433	0.012289	1.8563	0.103883	1834
Methyl_alpha-hydroxyisobutyrate	0.0093	2.19511	0.321958	0.007621	2.66166	0.367624	1835
Methyl_alpha-methoxyisobutyrate	0.007349	1.95798	0.321586	0.009337	2.39743	0.38419	1836
Methyl_benzoate	0.001273	0.940182	0.105715	0.000315	0.417335	0.015577	1837
Methyl_bromide	0.037412	1.49565	0.058852	0.008234	0.141349	0.000274	1838
Methyl_caprylate	5.4e-05	0.444813	0.080734	1.1e-05	0.254644	0.025378	1839
Methyl_carbamate.coskf	miscible	#VALUE!	#VALUE!	miscible	#VALUE!	#VALUE!	1840
Methyl_chloroacetate	0.022148	2.30936	0.242487	0.005337	1.08575	0.021777	1841
Methyl_chloroformate	0.011693	1.42363	0.071991	0.001967	0.185331	0.000752	1842
Methyl_chlorosilane	0.002237	0.276187	0.015813	0.000386	0.010804	7.8e-05	1843
Methyl_cyanoacetate	0.067509	1.98044	0.482361	0.008223	1.08018	0.032892	1844
Methylcyclohexane	0.000102	0.0560282	0.00697	9e-06	0.000819955	2.6e-05	1845
Methylcyclopentadiene	0.001508	0.362994	0.021903	0.000219	0.0183417	0.000113	1846
Methylcyclopentane	0.000225	0.0693276	0.007216	2.5e-05	0.00107369	2.8e-05	1847
Methyl_decanoate	6e-06	0.289485	0.064604	1e-06	0.153035	0.018782	1848
Methyl_dichlorosilane	0.001108	0.278311	0.017424	0.000158	0.0128652	8.7e-05	1849
Methyl_diethanolamine.coskf	miscible	#VALUE!	#VALUE!	miscible	#VALUE!	#VALUE!	1850
Methyl_dodecanoate	1e-06	0.201724	0.053806	0	0.094021	0.013636	1851
Methyl_erucate	0	0.0865887	0.03922	0	0.030777	0.006927	1852
Methylethanolamine.coskf	miscible	#VALUE!	#VALUE!	miscible	#VALUE!	#VALUE!	1853
Methyl_ethyl_ether	0.018522	2.21576	0.268151	0.017835	2.40988	0.463714	1854
Methyl-ethyl_sulfide	0.003827	0.663778	0.037419	0.00058	0.0465795	0.000219	1855
Methyl_fluoride	0.194106	1.75101	0.147677	0.037248	0.283341	0.000601	1856
Methyl_formate.coskf	miscible	#VALUE!	#VALUE!	0.1094	1.90961	0.127585	1857
Methylgermanium_trichloride	0.000972	0.535457	0.029221	0.00011	0.0504146	0.000162	1858
Methylglutaronitrile	0.067266	1.75899	0.58462	0.014493	1.47988	0.106367	1859
Methyl_glycolate.coskf	miscible	#VALUE!	#VALUE!	0.099896	2.11142	0.530859	1860
Methyl_hydroperoxide.coskf	miscible	#VALUE!	#VALUE!	miscible	#VALUE!	#VALUE!	1861
Methyl_iodide	0.016989	0.971612	0.037233	0.003912	0.0726236	0.000187	1862
Methyl_isobutyl_ether	0.001184	0.676141	0.08865	0.000507	0.661727	0.105045	1863
Methyl_isobutyl_ketone	0.004227	1.59243	0.226204	0.003214	1.93883	0.280127	1864
Methyl_isobutyrate	0.005023	1.44786	0.169034	0.002806	1.09603	0.071932	1865
Methyl_isocyanate	0.024882	1.47539	0.063092	0.005182	0.132177	0.000316	1866
Methyl_isopropenyl_ketone	0.018255	2.35679	0.344387	0.019514	2.65267	0.444562	1867
Methyl_isopropyl_sulfide	0.00159	0.491579	0.0332	0.000216	0.0325463	0.000196	1868
Methyl_lactate.coskf	miscible	#VALUE!	#VALUE!	miscible	#VALUE!	#VALUE!	1869
Methyl_linoleate	0	0.155967	0.051941	0	0.0724414	0.011029	1870
Methyl_linolenate	0	0.168132	0.050043	0	0.0785565	0.009935	1871
Methyl_maleic_anhydride	0.018408	2.01263	0.195795	0.002441	0.472927	0.005638	1872
Methyl_mercaptan	0.044246	1.72742	0.079586	0.009036	0.176002	0.000371	1873
Methyl_methacrylate	0.005914	1.48602	0.155995	0.002564	0.838602	0.035623	1874
Methyl_n-butyl_ether	0.001506	0.988498	0.139443	0.000879	1.18243	0.233093	1875
Methyl-n-butyl_sulfide	0.000334	0.306983	0.025599	3.3e-05	0.0176957	0.000148	1876
Methyl_n-butyrate	0.004961	1.53368	0.177352	0.002663	1.24647	0.082635	1877
Methyl_nicotinate	0.007783	2.28218	0.382952	0.006603	2.91224	0.44858	1878
Methyl_nonafluoro-n-butyl_ether	3e-05	0.114618	0.013528	2e-06	0.00465581	6.2e-05	1879
Methylnorbornene	0.000161	0.104992	0.010669	1.5e-05	0.00278053	4.8e-05	1880
Methyl_n-pentyl_ether	0.00044	0.689843	0.115524	0.000199	0.801523	0.189964	1881
Methyl_n-propyl_ether	0.00562	1.49585	0.187877	0.004326	1.79934	0.32937	1882
Methyl-n-propyl_sulfide	0.001088	0.439278	0.029963	0.000137	0.0278041	0.000178	1883
Methyl_oleate	0	0.115171	0.041498	0	0.0433	0.007313	1884
Methyl_palmitoleate	0	0.155462	0.049793	0	0.0684521	0.010634	1885
Methyl_p-aminobenzoate	0.007667	2.46815	0.38288	0.00208	3.43729	0.210836	1886
Methyl_para-toluate	0.000531	0.766519	0.098541	0.000119	0.357137	0.016646	1887
Methyl_pentyl_sulfide	0.000111	0.233581	0.023071	8e-06	0.0127322	0.000131	1888
m-Ethylphenol	0.003342	3.27875	0.280091	0.000981	23.566	0.288693	1889
Methyl_phenyl_sulfide	0.000821	0.532382	0.037526	7.4e-05	0.0400695	0.000205	1890
Methyl-phosphonic_acid_dimethyl_ester.coskf	miscible	#VALUE!	#VALUE!	miscible	#VALUE!	#VALUE!	1891
Methyl_p-hydroxybenzoate	0.007319	2.85365	0.433441	0.002553	5.72474	0.382475	1892
Methyl_propionate	0.020065	2.41109	0.329043	0.02251	2.49565	0.304301	1893
Methyl_salicylate	0.000658	0.662535	0.06608	9.2e-05	0.162755	0.003237	1894
Methyl_sec-butyl_ether	0.002165	1.16395	0.172744	0.001393	1.44897	0.32507	1895
Methyl_silane	0.003398	0.151648	0.008643	0.000673	0.00323512	4e-05	1896
Methyl_silicate	0.001136	0.981043	0.13673	0.000637	0.692124	0.052436	1897
m-Ethylstyrene	9.9e-05	0.235655	0.022413	6e-06	0.0129645	0.000113	1898
Methyl-t-butyl_sulfide	0.000721	0.355905	0.028499	8.1e-05	0.0218145	0.000167	1899
Methyl_tert-pentyl_ether	0.001219	0.965631	0.171109	0.000707	1.22477	0.339286	1900
Methyltestosterone	7.7e-05	0.865631	0.35763	7e-05	1.09966	0.564125	1901
m-Ethyltoluene	0.00011	0.169284	0.01671	8e-06	0.00688522	7.9e-05	1902
Methyl_t-pentyl_sulfide	0.000272	0.245282	0.023371	2.5e-05	0.0133132	0.000131	1903
Methyl_trichlorosilane	0.000392	0.211367	0.01571	4.6e-05	0.00966491	7.7e-05	1904
Methyl_vinyl_dichlorosilane	0.00039	0.311016	0.022853	3.9e-05	0.0185632	0.000117	1905
Methyl_vinyl_ether	0.021932	1.78205	0.10939	0.005853	0.51117	0.005351	1906
Mitotane	1e-06	0.15804	0.024639	0	0.0109405	0.000124	1907
m-Methylstyrene	0.00024	0.284188	0.023335	2e-05	0.0160595	0.000118	1908
m-Nitroaniline	0.017117	3.9548	0.425062	0.006323	31.602	0.292801	1909
m-Nitrobenzaldehyde	0.006545	1.72117	0.209909	0.001235	0.804604	0.024519	1910
Monobutyl_sulfate	0.005278	5.99489	0.507974	0.00215	55.9135	0.596565	1911
Monochlorosilane	0.004554	0.193768	0.01056	0.000937	0.00483338	5.1e-05	1912
Monoethanolamine.coskf	miscible	#VALUE!	#VALUE!	miscible	#VALUE!	#VALUE!	1913
Monomethyl_terephthalate	0.003274	2.45266	0.374496	0.00109	5.8682	0.363551	1914
Monomethyl_urea.coskf	miscible	#VALUE!	#VALUE!	miscible	#VALUE!	#VALUE!	1915
Monoolein	0	0.335915	0.152411	0	0.233152	0.097168	1916
Mono-tert-butylhydroquinone	0.004524	4.99852	0.487491	0.002136	46.2289	0.583625	1917
Monuron	0.00053	1.28951	0.224569	0.000117	1.15974	0.157034	1918
Morniflumate	0	0.357921	0.126761	0	0.574397	0.162716	1919
Morphine	0.000264	1.03026	0.287108	4.9e-05	0.905591	0.195916	1920
Morpholine.coskf	miscible	#VALUE!	#VALUE!	miscible	#VALUE!	#VALUE!	1921
m-Phenylenediamine	0.115031	1.89859	0.696235	0.047411	26.7423	0.444634	1922
m-Picoline	0.011804	2.54031	0.423002	0.008324	2.97716	0.543519	1923
m-Terphenyl	5e-06	0.212842	0.028392	0	0.0157048	0.000148	1924
m-Tolualdehyde	0.00299	1.34354	0.165273	0.001126	1.07084	0.071725	1925
m-Toluic_acid	0.00422	2.63619	0.314834	0.001291	7.48192	0.297176	1926
m-Toluidine	0.006183	3.22507	0.189694	0.001844	36.3389	0.080677	1927
m-Toluyl_alcohol	0.003614	2.0838	0.240851	0.000774	3.15189	0.128576	1928
m-Xylene	0.000293	0.226991	0.018578	2.9e-05	0.0102406	9.1e-05	1929
N-2-Hydroxyethyl-piperazine	0.024217	1.95246	0.714035	0.028212	1.64892	0.837463	1930
Nalidixic_acid	0.003817	1.77192	0.548488	0.004667	1.80524	0.624815	1931
N-Aminoethyl_ethanolamine.coskf	miscible	#VALUE!	#VALUE!	miscible	#VALUE!	#VALUE!	1932
Nandrolone_acetate	3e-05	0.834728	0.300203	4.2e-05	1.33897	0.477359	1933
Nandrolone	0.00019	1.05663	0.405892	0.000201	1.25125	0.618503	1934
Nandrolone_propionate	9e-06	0.679399	0.265937	1e-05	1.10601	0.433733	1935
Naphthacene	9e-06	0.218462	0.027945	0	0.0155155	0.000143	1936
Naphthalene	0.000349	0.318888	0.024886	3.2e-05	0.0192609	0.000126	1937
N-Butyl-1-butanamine	4.4e-05	0.703986	0.22458	9e-06	0.770446	0.332291	1938
n-Butyl_acetate	0.001308	1.04207	0.132913	0.000561	0.722106	0.050853	1939
n-Butyl_acrylate	0.000498	0.755393	0.098994	0.000144	0.377179	0.021238	1940
N-Butylaniline	6.6e-05	0.439323	0.043383	5e-06	0.803393	0.005219	1941
n-Butylbenzene	3.6e-05	0.137959	0.015789	2e-06	0.00537329	7.2e-05	1942
n-Butylbenzene_hydroperoxide	0.000638	1.69303	0.237902	0.000123	3.63784	0.173239	1943
n-Butyl_benzoate	4.4e-05	0.34937	0.058065	5e-06	0.113213	0.006553	1944
n-Butylcyclohexane	4e-06	0.0376629	0.00696	0	0.000548744	2.4e-05	1945
n-Butylcyclopentane	8e-06	0.0431827	0.007095	0	0.0006521	2.5e-05	1946
n-Butyl_ethyl_ether	0.000359	0.626412	0.107455	0.000154	0.748638	0.195293	1947
n-Butyl_formate	0.004202	1.4211	0.149459	0.001409	0.764636	0.030231	1948
n-Butylhydroperoxide	0.014402	2.81693	0.380797	0.006586	4.70849	0.308599	1949
n-Butyl_iodide	0.000425	0.240728	0.018041	4.8e-05	0.0105903	8.9e-05	1950
n-Butyl_isocyanate	0.000504	0.332059	0.024399	5.6e-05	0.018555	0.000138	1951
n-Butyl_lactate	0.000721	1.16486	0.18761	0.000337	1.27891	0.180844	1952
n-Butyl_mercaptan	0.000975	0.424904	0.028262	0.000118	0.0262952	0.000162	1953
n-Butyl_methacrylate	0.000167	0.548199	0.085497	4.2e-05	0.278226	0.0212	1954
n-Butyl_n-butyrate	0.000146	0.595947	0.101022	4.6e-05	0.431645	0.047315	1955
n-Butyl_nonanoate	1e-06	0.198463	0.056812	0	0.102	0.018225	1956
n-Butyl_propionate	0.000418	0.789909	0.118135	0.000169	0.602861	0.058144	1957
n-Butyl_stearate	0	0.0728613	0.035327	0	0.0266706	0.007888	1958
n-Butyl_valerate	4.6e-05	0.44396	0.083592	1e-05	0.273069	0.030205	1959
n-Decyl_acetate	2e-06	0.26814	0.067758	0	0.147343	0.021851	1960
n-Decylamine	1.4e-05	0.762671	0.283937	2e-06	0.902462	0.396434	1961
n-Decylbenzene	0	0.0552946	0.012282	0	0.00165378	4.7e-05	1962
n-Decylcyclohexane	0	0.0236356	0.007221	0	0.000345141	2.1e-05	1963
n-Decylcyclopentane	0	0.0254739	0.007276	0	0.000380112	2.2e-05	1964
n-Decyl_formate	5e-06	0.268734	0.054674	0	0.0913173	0.006969	1965
n-Decyl_mercaptan	1e-06	0.0962503	0.016093	0	0.00400206	7.8e-05	1966
n-Dodecanoic_acid	7e-06	0.609301	0.14057	1e-06	0.968084	0.110927	1967
n-Dodecylamine	1e-06	0.522736	0.241121	0	0.622603	0.352192	1968
n-Dodecylbenzene	0	0.0437898	0.011511	0	0.00119733	4.2e-05	1969
n-Dodecylcyclopentane	0	0.0225489	0.007361	0	0.000335158	2.1e-05	1970
n-Dodecyl_mercaptan	0	0.0726931	0.014776	0	0.00275126	6.7e-05	1971
n-Eicosanoic_acid	0	0.303246	0.12187	0	0.363348	0.085641	1972
Neoabietic_acid	5e-06	0.44301	0.133127	0	0.35687	0.066982	1973
Neoheptanoic_acid	0.005219	1.84648	0.314974	0.001849	1.80303	0.208401	1974
Neohexanoic_acid	0.005974	2.23375	0.317519	0.002016	3.77904	0.275983	1975
Neopentanoic_acid	0.015408	2.68896	0.403759	0.007049	4.7508	0.348853	1976
Neopentyl_glycol.coskf	miscible	#VALUE!	#VALUE!	miscible	#VALUE!	#VALUE!	1977
N-Ethyl-2-methylallylamine	0.000745	1.16979	0.196294	0.000207	1.60979	0.271505	1978
N-Ethyl-2-pyrrolidone	0.026387	2.25167	0.708183	miscible	#VALUE!	#VALUE!	1979
N-Ethylaniline	0.000764	0.879162	0.073104	0.000106	1.10553	0.013802	1980
N-Ethylethanamine	0.003826	1.8341	0.307541	0.001659	2.10576	0.41084	1981
N-Ethylmorpholine	0.005236	2.01424	0.390017	0.00624	2.19782	0.622721	1982
n-Henicosane	0	0.0181442	0.007609	0	0.000271033	2.1e-05	1983
n-Heptacosane	0	0.0146229	0.007876	0	0.000217553	2e-05	1984
n-Heptadecanoic_acid	0	0.420273	0.142438	0	0.542444	0.106046	1985
n-Heptadecylbenzene	0	0.0301026	0.010748	0	0.000732177	3.6e-05	1986
n-Heptanoic_acid	0.001129	1.76931	0.251974	0.000317	3.11374	0.21883	1987
n-Heptyl_acetate	5.4e-05	0.491653	0.091888	1.2e-05	0.311292	0.034065	1988
n-Heptylamine	0.000301	1.27728	0.322584	0.000103	1.55941	0.429921	1989
n-Heptylbenzene	1e-06	0.0787862	0.013309	0	0.00258854	5.5e-05	1990
n-Heptylcyclopentane	0	0.0318693	0.007159	0	0.000477376	2.3e-05	1991
n-Heptyl_formate	0.00012	0.529236	0.078287	2e-05	0.218576	0.012158	1992
n-Heptyl_mercaptan	3.3e-05	0.174569	0.019532	2e-06	0.00866222	0.000105	1993
n-Hexacosane	0	0.0151856	0.007852	0	0.000226879	2e-05	1994
n-Hexadecanoic_acid	0	0.479397	0.152122	0	0.64659	0.117452	1995
n-Hexadecylbenzene	0	0.0324169	0.010925	0	0.000809664	3.7e-05	1996
n-Hexadecylcyclopentane	0	0.0185463	0.007543	0	0.000275219	2.1e-05	1997
n-Hexanoic_acid	0.00394	2.32758	0.299942	0.0013	4.99845	0.275904	1998
n-Hexylbenzene	4e-06	0.091659	0.013871	0	0.0031481	5.9e-05	1999
n-Hexylcyclopentane	1e-06	0.0349201	0.007132	0	0.000525182	2.4e-05	2000
n-Hexyl_formate	0.000375	0.718337	0.093741	8.5e-05	0.321772	0.016092	2001
n-Hexyl_iodide	4.3e-05	0.136294	0.01487	3e-06	0.00505328	6.8e-05	2002
n-Hexylmercaptan	0.000102	0.224842	0.021579	7e-06	0.0119229	0.000119	2003
Niacin	0.048061	2.11359	0.631133	0.014862	3.50373	0.38003	2004
Nicotinamide.coskf	miscible	#VALUE!	#VALUE!	miscible	#VALUE!	#VALUE!	2005
Nicotinonitrile	0.04555	2.30156	0.522527	0.023497	3.19428	0.440281	2006
Niflumic_acid	2.5e-05	1.7282	0.20683	3e-06	30.6607	0.294311	2007
Nitric_acid.coskf	miscible	#VALUE!	#VALUE!	miscible	#VALUE!	#VALUE!	2008
Nitrobenzene	0.003782	1.15494	0.093618	0.000584	0.33131	0.005173	2009
Nitroethane	0.059246	2.33847	0.268713	0.011034	0.962616	0.012379	2010
Nitrogen	0.056275	0.292761	0.009476	0.019236	0.00713955	5.1e-05	2011
Nitrogen_trichloride	0.001618	0.196491	0.011493	0.000279	0.00631074	5.6e-05	2012
Nitrogen_trifluoride	0.008598	0.142424	0.006853	0.002227	0.00204347	3.1e-05	2013
Nitroglycerine	0.000288	1.01388	0.070264	1.1e-05	0.151844	0.000484	2014
Nitromethane.coskf	miscible	#VALUE!	#VALUE!	0.028791	1.13284	0.015814	2015
Nitrosyl_chloride	0.041987	1.5401	0.056832	0.009532	0.154259	0.000265	2016
Nitrosyl_fluoride	0.185051	1.85224	0.154911	0.034242	0.340583	0.000731	2017
Nitrous_acid.coskf	miscible	#VALUE!	#VALUE!	miscible	#VALUE!	#VALUE!	2018
Nitrous_oxide	0.07324	1.3095	0.042362	0.020029	0.124815	0.000191	2019
N-Methyl-2-pyrrolidone.coskf	miscible	#VALUE!	#VALUE!	miscible	#VALUE!	#VALUE!	2020
N-Methylacetamide.coskf	miscible	#VALUE!	#VALUE!	miscible	#VALUE!	#VALUE!	2021
N-Methylaniline	0.00232	1.46527	0.087049	0.000395	4.0827	0.011526	2022
N-Methylcyclohexylamine	0.000596	1.12909	0.279493	0.000205	1.22847	0.384537	2023
N-Methylformamide.coskf	miscible	#VALUE!	#VALUE!	miscible	#VALUE!	#VALUE!	2024
N-Methylmethanamine	0.089314	2.02878	0.624386	0.066133	2.15266	0.704669	2025
N-Methylpyrrole	0.006846	1.11859	0.062305	0.000892	0.0977728	0.00034	2026
N-Methylpyrrolidine	0.002035	1.25458	0.233788	0.000911	1.24432	0.344862	2027
N-Methylthiopyrrolidone	0.004878	1.25387	0.09843	0.00045	0.134547	0.000795	2028
N,N'-Bis(2-hydroxyethyl)ethylenediamine.coskf	miscible	#VALUE!	#VALUE!	miscible	#VALUE!	#VALUE!	2029
N,N'-Di(2-hydroxyethyl)piperazine	0.007493	1.97639	0.634948	0.012458	1.68851	0.834878	2030
N,N-Diethyl-acetamide	0.013895	2.39886	0.655588	0.037744	1.32398	0.900412	2031
N,N-Diethylaniline	6.1e-05	0.204879	0.022702	3e-06	0.0108103	0.000115	2032
N,N-Diethylethanamine	0.000239	0.616574	0.145369	5.8e-05	0.660141	0.236028	2033
N,N-Diethylformamide	0.037263	2.0969	0.721126	miscible	#VALUE!	#VALUE!	2034
N,N-Diethylhydroxylamine	0.007827	1.85959	0.299314	0.003396	1.40617	0.256948	2035
N,N-Diethylmethylamine	0.001006	1.05214	0.210753	0.000344	1.11527	0.315043	2036
N,N-Dimethylacetamide.coskf	miscible	#VALUE!	#VALUE!	miscible	#VALUE!	#VALUE!	2037
N,N-Dimethylaniline	0.000452	0.388552	0.031617	4.2e-05	0.0290914	0.000208	2038
N,N-Dimethylformamide.coskf	miscible	#VALUE!	#VALUE!	miscible	#VALUE!	#VALUE!	2039
N,N-Dimethylindoaniline	0.000927	1.86712	0.487506	0.001525	2.46855	0.735395	2040
N,N-Dimethylmethanamine	0.01046	2.08388	0.304823	0.006497	2.13687	0.417288	2041
N,N-Dimethyl-n-butylamine	0.000296	0.773667	0.183986	8.6e-05	0.796389	0.290837	2042
N,N'-diphenyl-p-phenylenediamine	1.5e-05	1.04559	0.119829	1e-06	24.9273	0.085428	2043
N,N'-Di-tert-butylethylenediamine	6e-05	1.05071	0.357337	2e-05	1.43061	0.50574	2044
N-Nitrosodiethanolamine.coskf	miscible	#VALUE!	#VALUE!	miscible	#VALUE!	#VALUE!	2045
N-Nitrosodimethylamine.coskf	miscible	#VALUE!	#VALUE!	0.203881	1.49991	0.529776	2046
n-Nonadecanoic_acid	0	0.34264	0.130429	0	0.430813	0.095825	2047
n-Nonanoic_acid	0.000137	1.09539	0.185062	2.5e-05	2.12377	0.163909	2048
n-Nonyl_acetate	6e-06	0.314128	0.072426	1e-06	0.178329	0.024026	2049
n-Nonylamine	3.5e-05	0.849795	0.283151	7e-06	1.02587	0.392691	2050
n-Nonylbenzene	0	0.0598566	0.012341	0	0.0018011	4.8e-05	2051
n-Nonylcyclopentane	0	0.0272937	0.007235	0	0.000407544	2.2e-05	2052
n-Nonyl_formate	1.4e-05	0.329274	0.061049	1e-06	0.123606	0.00871	2053
n-Nonyl_mercaptan	4e-06	0.116094	0.017095	0	0.00511159	8.5e-05	2054
n-Octadecanoic_acid	0	0.371245	0.134052	0	0.487615	0.100557	2055
n-Octadecylbenzene	0	0.0288168	0.010829	0	0.000703602	3.6e-05	2056
n-Octanoic_acid	0.0005	1.37097	0.226279	0.000121	2.00339	0.188276	2057
n-Octyl_acetate	1.8e-05	0.39626	0.082871	3e-06	0.24313	0.030067	2058
n-Octylamine	0.000117	1.09899	0.32036	3.3e-05	1.31427	0.430071	2059
n-Octylbenzene	0	0.0678058	0.012748	0	0.00212369	5.1e-05	2060
n-Octylcyclopentane	0	0.0294185	0.007198	0	0.00044072	2.3e-05	2061
n-Octyl_formate	4.1e-05	0.408318	0.067399	5e-06	0.156704	0.009441	2062
n-Octyl_mercaptan	1e-05	0.138863	0.01804	0	0.00642923	9.3e-05	2063
Nonadecane	0	0.0198538	0.007516	0	0.000296943	2.1e-05	2064
Nonanal	6.9e-05	0.49127	0.088995	1.5e-05	0.341799	0.040562	2065
Nonane	3e-06	0.0407471	0.007171	0	0.000626864	2.5e-05	2066
Nonylphenol	1e-06	0.340531	0.067871	0	1.33831	0.055342	2067
Norethindrone_acetate	1.9e-05	0.764594	0.278041	1.4e-05	1.19216	0.393594	2068
Norethindrone	5.6e-05	0.826108	0.303276	2.9e-05	0.990444	0.406271	2069
Norethindrone_enanthate	0	0.41445	0.205062	0	0.662398	0.318838	2070
n-Pentacosane	0	0.0155812	0.00778	0	0.000231603	2e-05	2071
n-Pentadecanoic_acid	1e-06	0.538386	0.160494	0	0.706316	0.122361	2072
n-Pentadecylbenzene	0	0.0346999	0.01107	0	0.000890709	3.8e-05	2073
n-Pentanoic_acid	0.009928	2.8206	0.384264	0.004944	5.13983	0.3361	2074
n-Pentyl_acetate	0.000505	0.87673	0.12965	0.000203	0.653204	0.058793	2075
n-Pentylbenzene	1.1e-05	0.111299	0.014756	0	0.0040686	6.5e-05	2076
n-Pentylcyclohexane	1e-06	0.0340134	0.006986	0	0.000495624	2.3e-05	2077
n-Pentyl_formate	0.001183	0.987197	0.113248	0.000322	0.460675	0.019339	2078
n-Pentyl_n-butyrate	4.9e-05	0.470508	0.092379	1.3e-05	0.325861	0.042302	2079
N-Piperazineethanamine	0.016818	2.26318	0.74827	0.02625	1.73811	0.882724	2080
N-Propyl-1-propanamine	0.000395	1.11622	0.262407	0.000133	1.244	0.369619	2081
n-Propylbenzene	0.00011	0.175905	0.01713	8e-06	0.00736757	8.1e-05	2082
n-Propylbenzene_hydroperoxide	0.001639	2.1625	0.27303	0.000386	5.32192	0.207249	2083
n-Propyl_benzoate	0.000122	0.499491	0.075337	2.1e-05	0.205866	0.011604	2084
n-Propylcyclohexane	1.2e-05	0.0424404	0.00696	1e-06	0.000619063	2.4e-05	2085
n-Propylcyclopentane	2.5e-05	0.0490015	0.007089	2e-06	0.000741614	2.6e-05	2086
n-Propyl_formate	0.012774	2.00112	0.205085	0.005933	1.18171	0.043817	2087
n-Propyl_iodide	0.00138	0.347124	0.020808	0.000198	0.0171046	0.000107	2088
n-Propyl_isobutyrate	0.000418	0.737903	0.112607	0.000171	0.541845	0.053765	2089
n-Propylmercaptan	0.003517	0.65366	0.035438	0.000512	0.0453555	0.000202	2090
n-Propyl_methacrylate	0.000516	0.743147	0.101767	0.000167	0.406981	0.027448	2091
n-Propyl_n-butyrate	0.000457	0.810175	0.121037	0.00019	0.634429	0.062309	2092
n-Propyl_propionate	0.001352	1.11121	0.147172	0.000729	0.954463	0.085604	2093
n-Tetracosane	0	0.0162051	0.007745	0	0.000241528	2e-05	2094
n-Tetradecanoic_acid	2e-06	0.632581	0.173696	0	0.90922	0.140118	2095
N-Tetradecylamine	0	0.431912	0.236647	0	0.503515	0.352629	2096
n-Tetradecylbenzene	0	0.0379936	0.011317	0	0.00100881	4e-05	2097
n-Tetradecylcyclopentane	0	0.0201335	0.007423	0	0.000297275	2.1e-05	2098
n-Tricosane	0	0.0167865	0.007698	0	0.000250084	2e-05	2099
n-Tridecylbenzene	0	0.0399198	0.011265	0	0.00105764	4e-05	2100
n-Tridecylcyclopentane	0	0.0214434	0.007406	0	0.000318748	2.1e-05	2101
n-Undecanoic_acid	5.9e-05	1.02407	0.22225	8e-06	1.37692	0.176643	2102
n-Undecylbenzene	0	0.0491261	0.011897	0	0.00141135	4.5e-05	2103
o-Anisic_acid	0.008094	2.2679	0.405625	0.002601	2.44502	0.256121	2104
o-Anisidine	0.006477	2.1485	0.234581	0.001503	3.11748	0.102863	2105
o-Chloroaniline	0.005044	3.51877	0.170812	0.001888	100.818	0.127644	2106
o-Chlorobenzoic_acid	0.005646	3.10734	0.340552	0.001725	12.1742	0.330711	2107
o-Chloronitrobenzene	0.001536	0.89916	0.077951	0.000204	0.226012	0.003462	2108
o-Chlorophenol	0.002397	1.61943	0.106726	0.000608	12.7737	0.0756	2109
o-Chlorotoluene	0.000356	0.24194	0.018627	3.7e-05	0.011715	9.2e-05	2110
Octadecamethyloctasiloxane	0	0.0342819	0.020034	0	0.0056542	0.000895	2111
Octadecane	0	0.0208939	0.007483	0	0.000313419	2.1e-05	2112
Octafluoro-2-butene	7.5e-05	0.0904028	0.009341	6e-06	0.00241494	4.1e-05	2113
Octafluorocyclobutane	0.000123	0.0937048	0.009321	1.1e-05	0.00264832	4.2e-05	2114
Octafluoropropane	9.5e-05	0.0409933	0.005639	9e-06	0.000439215	2e-05	2115
Octahydro-pentalene-1-carboxylic_acid.coskf	0.003985	1.85934	0.334671	0.001263	2.47234	0.268829	2116
Octamethylcyclotetrasiloxane	0	0.115753	0.02954	0	0.0259945	0.001846	2117
Octamethyltrisiloxane	0	0.0801968	0.019603	0	0.0200163	0.001958	2118
Octanal	0.000228	0.659667	0.104773	6.7e-05	0.513994	0.055926	2119
Octane	7e-06	0.0453226	0.007129	0	0.000694976	2.5e-05	2120
Octochlorodibenzo-p-dioxin	0	0.0522826	0.012922	0	0.00168052	4.9e-05	2121
o-Cymene	6.7e-05	0.154946	0.017097	4e-06	0.00648055	8.1e-05	2122
o-Diethylbenzene	5.5e-05	0.142731	0.016262	3e-06	0.00565231	7.5e-05	2123
o-Dinitrobenzene	0.002372	1.23478	0.103953	0.000184	0.218792	0.001717	2124
o-Ethylaniline	0.002232	1.66074	0.158225	0.000439	3.49296	0.066478	2125
o-Ethylphenol	0.002899	4.00403	0.283317	0.000998	52.0382	0.343099	2126
o-Ethylstyrene	0.000117	0.227064	0.021625	8e-06	0.0120784	0.000108	2127
o-Ethyltoluene	0.000158	0.192937	0.018283	1.3e-05	0.00857369	8.9e-05	2128
Oleic_acid	0	0.310908	0.101509	0	0.500522	0.070275	2129
o-Methylstyrene	0.000276	0.282186	0.023157	2.4e-05	0.0156335	0.000117	2130
o-Nitroaniline	0.013861	2.96188	0.384023	0.003945	7.40531	0.210672	2131
o-Nitroanisole	0.003881	1.483	0.176184	0.000852	0.80026	0.029465	2132
o-Nitrodiphenylamine	0.0001	0.576363	0.086104	9e-06	0.289795	0.013639	2133
o,p-Bisphenol_A	0.000752	3.60529	0.413949	0.00024	39.7348	0.50227	2134
o-Phenylenediamine	0.045598	2.6813	0.536407	0.013554	9.90791	0.326558	2135
o-Picoline	0.009043	2.43186	0.376297	0.006077	2.99488	0.491075	2136
Orthophosphoric_acid.coskf	miscible	#VALUE!	#VALUE!	miscible	#VALUE!	#VALUE!	2137
[truncated: 423 more rows]

## Sheet: Levulinic Acid
Name	Org_in_Water_Mole_Fraction, 423K	P_LA,423K	Water_in_Org_Mole_Fraction, 423K	Org_in_Water_Mole_Fraction, 298K	P_LA,298K	Water_in_Org_Mole_Fraction, 298 K	#
1,1,1,2,2,3,4,5,5,5-Decafluoropentane.coskf	5.7e-05	0.313526	0.97652	4e-06	0.0301846	0.999848	1
1,1,1,2,2-Pentafluoropropane	0.001387	0.434969	0.979855	0.000207	0.024727	0.999894	2
1,1,1,2,3,3,3-Heptafluoropropane	0.000721	0.65377	0.970936	9.6e-05	0.093704	0.999783	3
1,1,1,2,3,3-Hexafluoropropane	0.00385	1.83291	0.937304	0.000562	0.363321	0.999566	4
1,1,1,2-Tetrachlorodifluoroethane	0.000141	0.124447	0.989952	1.3e-05	0.00339491	0.999955	5
1,1,1,2-Tetrachloroethane	0.000833	0.521563	0.972243	9.7e-05	0.0385617	0.999845	6
1,1,1,2-Tetrafluoroethane	0.0106	1.61573	0.949345	0.002014	0.188166	0.999725	7
1,1,1,3,3,3-Hexafluoropropane	0.00179	1.02015	0.961078	0.000267	0.132553	0.999754	8
1,1,1,3,3-Pentachloropropane	0.000141	0.320064	0.976526	1e-05	0.0203508	0.999874	9
1,1,1,3,3-Pentafluorobutane	0.002259	1.13116	0.947021	0.000247	0.120665	0.999696	10
1,1,1,3,3-Pentafluoropropane	0.004864	1.55437	0.942107	0.00066	0.209161	0.999664	11
1,1,1-Trichloroethane	0.001256	0.397025	0.9802	0.000177	0.0202597	0.999898	12
1,1,1-Trichlorofluoroethane	0.001615	0.669271	0.968266	0.000215	0.0520261	0.999822	13
1,1,1-Trichlorotrifluoroethane	0.00019	0.115906	0.990939	2e-05	0.00279172	0.99996	14
1,1,1-Trifluoroethane	0.010832	1.14449	0.963937	0.002274	0.0940925	0.999814	15
1,1,2,2,3-Pentafluoropropane	0.00587	1.76033	0.935308	0.000829	0.265667	0.999621	16
1,1,2,2-Tetrabromoethane	0.000471	0.594168	0.964848	4.3e-05	0.0536094	0.999793	17
1,1,2,2-Tetrachlorodifluoroethane	0.000132	0.121097	0.990118	1.2e-05	0.00323452	0.999956	18
1,1,2,2-Tetrachloroethane	0.001094	0.768667	0.963075	0.000129	0.0787764	0.999775	19
1,1,2,2-Tetrafluoroethane	0.018742	3.03917	0.908487	0.003798	0.689409	0.999356	20
1,1,2,2-Tetraphenylethane	0	0.188141	0.965849	0	0.0119784	0.999819	21
1,1,2-Trichloroethane	0.003297	1.10747	0.953373	0.000411	0.113125	0.999734	22
1,1,2-Trichlorotrifluoroethane	0.000186	0.119338	0.990738	1.9e-05	0.00297189	0.999959	23
1,1,2-Trifluoroethane	0.033738	2.77137	0.887491	0.005543	0.494097	0.999316	24
1,1,2-Trimethylcyclopentane	5.8e-05	0.0714472	0.99243	4e-06	0.0011924	0.999971	25
1,1,2-Triphenylethane	2e-06	0.190014	0.972605	0	0.0106723	0.999862	26
1,1,3-Trimethylcyclohexane	2.5e-05	0.063651	0.992415	1e-06	0.00105088	0.999972	27
1,1,3-Trimethylcyclopentane	4.3e-05	0.0677679	0.992656	3e-06	0.00108121	0.999973	28
1,1-Dibromoethane	0.003453	0.814393	0.964512	0.000476	0.0601578	0.999809	29
1,1-Dichloro-1-fluoroethane	0.00259	0.558733	0.976111	0.000403	0.033232	0.999876	30
1,1-Dichloroethane	0.005677	0.959778	0.962307	0.000895	0.074729	0.999798	31
1,1-Dichloroethene	0.003181	0.46536	0.981662	0.000561	0.0242517	0.999904	32
1,1-Dichloropropane	0.001565	0.552044	0.973155	0.000214	0.0336069	0.999857	33
1,1-Dichlorotetrafluoroethane	0.000255	0.105854	0.991952	2.9e-05	0.00216074	0.999966	34
1,1-Diethylcyclohexane	1.2e-05	0.0527509	0.992783	1e-06	0.000799405	0.999975	35
1,1-Difluoroethane	0.029946	1.97477	0.923944	0.0057	0.197964	0.999645	36
1,1-Difluoroethylene	0.011788	0.781022	0.97787	0.002981	0.0505281	0.999881	37
1,1-Dimethoxyethane	0.017752	3.11357	0.617777	0.033882	3.02555	0.31374	38
1,1-Dimethylcyclohexane	6.4e-05	0.0707309	0.992548	5e-06	0.0011536	0.999972	39
1,1-Dimethylcyclopentane	0.000122	0.0820743	0.992444	1.1e-05	0.00137741	0.999971	40
1,1-Diphenylethane	1.9e-05	0.217435	0.976754	1e-06	0.0109695	0.999886	41
1,2,3,4,6,7,8-Heptachlorodibenzo-p-dioxin.coskf	0	0.0778167	0.985711	0	0.00264367	0.999941	42
1,2,3,4,7,8-Hexachlorodibenzo-p-dioxin.coskf	0	0.0966347	0.9841	0	0.00383086	0.99993	43
1,2,3,4,7-Pentachlorodibenzo-p-dioxin.coskf	0	0.111623	0.983251	0	0.00466976	0.999925	44
1,2,3,4-Tetrachlorodibenzo-p-dioxin	1e-06	0.12228	0.983022	0	0.00507119	0.999923	45
1,2,3,4-Tetrahydronaphthalene	0.000107	0.193049	0.983479	8e-06	0.00722835	0.999922	46
1,2,3,4-Tetramethylbenzene	6.9e-05	0.187801	0.982781	5e-06	0.00728996	0.999918	47
1,2,3,4-Tetramethylcyclohexane	1.1e-05	0.0545076	0.992615	1e-06	0.000853886	0.999974	48
1,2,3,5-Tetraethylbenzene	1e-06	0.0828556	0.987289	0	0.00234647	0.999948	49
1,2,3,5-Tetramethylbenzene	5.3e-05	0.175501	0.983621	3e-06	0.0065474	0.999924	50
1,2,3,6-Tetrahydrobenzaldehyde	0.00515	1.9311	0.822643	0.0022	2.69065	0.925626	51
1,2,3,6-Tetrahydrobenzyl_alcohol	0.005465	2.1944	0.704144	0.001617	2.41833	0.771059	52
1,2,3,7-Tetrachlorodibenzo-p-dioxin	1e-06	0.136484	0.981713	0	0.006485	0.999913	53
1,2,3-Benzenetriol.coskf	miscible	#VALUE!	miscible	miscible	#VALUE!	miscible	54
1,2,3-Butanetriol.coskf	miscible	#VALUE!	miscible	miscible	#VALUE!	miscible	55
1,2,3-Trichlorobenzene	0.000144	0.236991	0.982375	1.2e-05	0.0111988	0.999913	56
1,2,3-Trichloropropane	0.003762	1.51675	0.921104	0.000306	0.186848	0.999484	57
1,2,3-Triethylbenzene	9e-06	0.117946	0.985613	0	0.0038237	0.999937	58
1,2,3-Trimethyl-4-ethylbenzene	3e-05	0.168407	0.982574	2e-06	0.00656729	0.999917	59
1,2,3-Trimethylbenzene	0.000174	0.23997	0.981299	1.5e-05	0.010124	0.999908	60
1,2,3-Trimethylindene	3.3e-05	0.18445	0.981502	2e-06	0.00769481	0.999912	61
1,2,4,5-Tetraisopropylbenzene	0	0.0736607	0.985544	0	0.00232249	0.99994	62
1,2,4,5-Tetramethylbenzene	4.6e-05	0.163193	0.984457	3e-06	0.00578569	0.999929	63
1,2,4-Butanetriol.coskf	miscible	#VALUE!	miscible	miscible	#VALUE!	miscible	64
1,2,4-Trichlorobenzene	0.000132	0.255046	0.981431	1.1e-05	0.0131814	0.999905	65
1,2,4-Trichlorodibenzo-p-dioxin	3e-06	0.154058	0.981015	0	0.00741034	0.999907	66
1,2,4-Triethylbenzene	6e-06	0.110026	0.986292	0	0.0034081	0.999941	67
1,2,4-Trimethyl-3-ethylbenzene	3.4e-05	0.173245	0.982192	2e-06	0.00687817	0.999914	68
1,2,4-Trimethyl-5-ethylbenzene	2.6e-05	0.167601	0.982581	1e-06	0.00656189	0.999917	69
1,2,4-Trimethylbenzene	0.000131	0.220889	0.982375	1e-05	0.00891957	0.999915	70
1,2-Benzenedicarboxylic_acid,_heptyl,_nonyl_ester.coskf	0	0.175397	0.946477	0	0.107308	0.992493	71
1,2-Benzene_dicarboxylic_acid,_heptyl,_undecyl_ester.coskf	0	0.129806	0.956948	0	0.0661462	0.995127	72
1,2-Benzenediol	0.078778	2.2522	0.259212	0.055492	4.89534	0.211666	73
1,2-Butadiene	0.005121	0.653847	0.975223	0.000909	0.0356996	0.999872	74
1,2-Butanediol.coskf	miscible	#VALUE!	miscible	miscible	#VALUE!	miscible	75
1,2-dibromododecane	0	0.116724	0.981479	0	0.00502422	0.999913	76
1,2-Dibromoethane	0.004145	1.03791	0.9552	0.000523	0.0868346	0.999758	77
1,2-Dibromotetrafluoroethane	0.000191	0.134956	0.990054	2e-05	0.00394225	0.999953	78
1,2-Dichloro-1,1,2-trifluoroethane	0.00123	0.654275	0.971745	0.000177	0.0677113	0.999817	79
1,2-Dichloro-4-nitrobenzene	0.000413	0.692535	0.944603	4.2e-05	0.185314	0.99833	80
1,2-Dichlorobenzene	0.000396	0.328798	0.979856	4.2e-05	0.0174488	0.999896	81
1,2-Dichlorobutane	0.001221	0.689733	0.960948	0.000125	0.0494147	0.999783	82
1,2-Dichloroethane	0.007308	1.28145	0.949784	0.001085	0.114688	0.999733	83
1,2-Dichlorohexafluorocyclobutane	4.7e-05	0.0904949	0.991015	3e-06	0.00209774	0.999963	84
1,2-Dichloropropane	0.004312	1.10286	0.946093	0.000481	0.0917238	0.999706	85
1,2-Dichlorotetrafluoroethane	0.000237	0.103458	0.99205	2.7e-05	0.00206638	0.999967	86
1,2-Diethoxyethane	0.000729	1.50815	0.836545	0.00063	3.57419	0.742893	87
1,2-Difluorobenzene	0.001527	0.573041	0.972856	0.00021	0.037979	0.999856	88
1,2-Difluoroethane	0.035253	2.12742	0.905251	0.005852	0.219732	0.999537	89
1,2-Dimethoxyethane	0.011418	2.95771	0.690433	0.019243	4.10298	0.439795	90
1,2-Dimethoxypropane	0.005349	2.60174	0.71462	0.007201	4.55224	0.471383	91
1,2-Dimethyl-3-hydroxy-4-pyridone.coskf	miscible	#VALUE!	miscible	miscible	#VALUE!	miscible	92
1,2-Dimethyl-3-propylbenzene	2.5e-05	0.16735	0.982653	1e-06	0.00653899	0.999918	93
1,2-Diphenylethane	1.7e-05	0.235551	0.975167	1e-06	0.0123575	0.999876	94
1,2-Epoxy-2-methylpropane	0.02763	3.047	0.6651	0.029626	4.32784	0.544828	95
1,2-Epoxy-3-phenoxypropane	0.001187	1.29464	0.882389	0.000178	0.935106	0.986408	96
1,2-Ethanediamine.coskf	miscible	#VALUE!	miscible	miscible	#VALUE!	miscible	97
1,2-Ethanediol.coskf	miscible	#VALUE!	miscible	miscible	#VALUE!	miscible	98
1,2-ethane_diphosphonic_acid	miscible	#VALUE!	miscible	0.066214	1.82319	0.14614	99
1,2-Ethanedithiol	0.007267	1.47418	0.923293	0.000813	0.133224	0.999546	100
1,2-Hexadiene	0.000406	0.281247	0.983075	4.6e-05	0.0113294	0.999917	101
1,2-Pentadiene	0.001398	0.40975	0.980589	0.000205	0.0187904	0.9999	102
1,2-Propadiene	0.02169	1.31845	0.959529	0.005149	0.105539	0.999798	103
1,2-Propanediamine.coskf	miscible	#VALUE!	miscible	miscible	#VALUE!	miscible	104
1,2-Propylene_glycol.coskf	miscible	#VALUE!	miscible	miscible	#VALUE!	miscible	105
1,3,5,7-Cyclooctatetraene	0.001108	0.541215	0.967831	0.000122	0.0330217	0.999828	106
1,3,5-Trichlorobenzene	9.6e-05	0.224792	0.982929	7e-06	0.0109636	0.999914	107
1,3,5-Triethylbenzene	4e-06	0.100928	0.987141	0	0.0029306	0.999946	108
1,3,5-Triisopropylbenzene	0	0.0902063	0.985613	0	0.00288767	0.999939	109
1,3,5-Trinitrobenzene	0.001312	1.27874	0.878043	5.8e-05	0.238232	0.998009	110
1,3,5-Tri-tert-butylbenzene	0	0.0701774	0.986297	0	0.00208601	0.999945	111
1,3,6,8-Tetrachlorodibenzo-p-dioxin	1e-06	0.138106	0.98149	0	0.00673423	0.999911	112
1,3-Benzenediol.coskf	miscible	#VALUE!	miscible	miscible	#VALUE!	miscible	113
1,3-Butadiene	0.006055	0.723416	0.972861	0.001095	0.0420481	0.999861	114
1,3-Butanediol.coskf	miscible	#VALUE!	miscible	miscible	#VALUE!	miscible	115
1,3-Cyclohexadiene	0.001592	0.404789	0.979133	0.00024	0.0182729	0.999893	116
1,3-dichloro-2-propanol	0.009467	2.72527	0.774772	0.00263	3.71272	0.905009	117
1,3-Dichlorobenzene	0.000336	0.330632	0.979812	3.4e-05	0.0182144	0.999895	118
1,3-Dichlorohexafluoropropane	5e-05	0.0728462	0.992443	4e-06	0.001326	0.99997	119
1,3-Dichloropropane	0.00429	1.20583	0.942061	0.000448	0.105592	0.999683	120
1,3-Dichloro-trans-2-butene	0.000997	0.574276	0.968953	0.000109	0.037167	0.999832	121
1,3-Difluorobenzene	0.001584	0.62769	0.971098	0.000217	0.0452548	0.999843	122
1,3-Dimethyl-2-imidazolidinone.coskf	0.05777	1.95989	0.233873	miscible	#VALUE!	miscible	123
1,3-Dimethyl-5-nitrobenzene	0.000378	0.720551	0.93781	4.7e-05	0.282677	0.996097	124
1,3-Dimethyladamantane	9e-06	0.0503161	0.992661	0	0.000772501	0.999974	125
1,3-Dimethyl_urea.coskf	miscible	#VALUE!	miscible	miscible	#VALUE!	miscible	126
1,3-Dimethylxanthine.coskf	miscible	#VALUE!	miscible	miscible	#VALUE!	miscible	127
1,3-Dioxane.coskf	miscible	#VALUE!	miscible	miscible	#VALUE!	miscible	128
1,3-Dioxolane.coskf	miscible	#VALUE!	miscible	miscible	#VALUE!	miscible	129
1,3-Diphenyltriazene	7.3e-05	0.96685	0.891351	6e-06	2.11458	0.952133	130
1,3-Di-tert-butyl_glycerin	4.3e-05	0.967179	0.82298	2.7e-05	2.63988	0.681905	131
1,3-Propanediamine.coskf	miscible	#VALUE!	miscible	miscible	#VALUE!	miscible	132
1,3-Propylene_glycol.coskf	miscible	#VALUE!	miscible	miscible	#VALUE!	miscible	133
1,3-Propylene_oxide.coskf	miscible	#VALUE!	miscible	miscible	#VALUE!	miscible	134
1,4-Benzenedicarboxylic_acid,_2-hydroxyethyl_methyl_ester.coskf	0.000896	1.74903	0.699239	0.000393	2.19981	0.814667	135
1,4-Benzenedicarboxylic_acid,bis(2,3-dihydroxypropyl)ester.coskf	0.000866	1.81537	0.501016	0.000537	2.39953	0.536531	136
1,4-Bis(3-aminopropyl)piperazine	0.001086	3.33074	0.31935	0.001424	5.16603	0.177559	137
1,4-Butanediisocyanate	0.000272	0.576486	0.957805	1.8e-05	0.0408857	0.999745	138
1,4-Butanediol.coskf	miscible	#VALUE!	miscible	miscible	#VALUE!	miscible	139
1,4-Cyclohexadiene	0.001486	0.388179	0.979978	0.000221	0.017166	0.999897	140
1,4-Cyclohexanedicarboxylic_acid	0.097843	1.1897	0.156979	0.03536	2.27465	0.269278	141
1,4-Cyclohexanedimethanol	0.008145	2.23132	0.463033	0.00553	2.30645	0.412936	142
1,4-Dibromobenzene	0.000262	0.361805	0.976748	2.4e-05	0.0220009	0.999879	143
1,4-Dichlorobenzene	0.000386	0.374632	0.977636	4e-05	0.0223156	0.999883	144
1,4-Dichlorobutane	0.001239	0.783558	0.954969	0.000114	0.0564891	0.999752	145
1,4-Dichloro-cis-2-butene	0.001979	1.06612	0.946892	0.000202	0.0995183	0.999697	146
1,4-Dichloro-trans-2-butene	0.001313	0.835007	0.956492	0.000127	0.0660566	0.999758	147
1,4-Dicyano-2-butene	0.050163	2.06355	0.463716	0.008773	2.06205	0.921825	148
1,4-Difluorobenzene	0.001864	0.717647	0.967458	0.000256	0.0552449	0.999822	149
1,4-Dioxane.coskf	miscible	#VALUE!	miscible	miscible	#VALUE!	miscible	150
1,4-Di-tert-butylbenzene	2e-06	0.0966231	0.98609	0	0.00302832	0.999942	151
1,4-Hexadiene	0.000564	0.352145	0.979535	6.4e-05	0.0160374	0.999895	152
1,4-Pentadiene	0.001768	0.484679	0.977074	0.000265	0.0240181	0.999882	153
1,5,9-Cyclododecatriene	1.7e-05	0.137367	0.983653	1e-06	0.00496922	0.999924	154
1,5-Cyclooctadiene	0.00029	0.245662	0.981593	2.9e-05	0.0099209	0.999907	155
1,5-Dichloropentane	0.000409	0.559065	0.962364	3.1e-05	0.0365404	0.999793	156
1,5-Hexadiene	0.000611	0.356484	0.979332	7e-05	0.0163112	0.999894	157
1,5-Naphthalene_diisocyanate	2.1e-05	0.264442	0.973716	1e-06	0.0156058	0.999861	158
1,5-Pentanediamine	0.018008	3.18853	0.264352	0.019995	3.42919	0.151915	159
1,5-Pentanediol.coskf	miscible	#VALUE!	miscible	miscible	#VALUE!	miscible	160
1,6-Hexamethylene_diisocyanate	3.1e-05	0.335823	0.967832	1e-06	0.0211731	0.999807	161
1,6-Hexanediol	0.023271	2.21765	0.313554	0.018175	2.20603	0.252419	162
1,6-Hexanediol_diacrylate	3.1e-05	0.897402	0.852903	9e-06	0.991238	0.954697	163
1,9-Decadiene	6e-06	0.130946	0.985249	0	0.00439524	0.999934	164
1-Acetyl-2-naphthol	0.000253	0.786151	0.916952	3.5e-05	0.602658	0.988616	165
1-Amino-2-propanol.coskf	miscible	#VALUE!	miscible	miscible	#VALUE!	miscible	166
1-Bromobutane	0.000894	0.412446	0.977196	0.00011	0.0202731	0.999881	167
1-Bromododecane	0	0.0753984	0.987371	0	0.00214498	0.999949	168
1-Bromoheptane	2.9e-05	0.174575	0.983605	2e-06	0.00659282	0.999923	169
1-Bromonaphthalene	9.4e-05	0.253233	0.979698	6e-06	0.0129781	0.999899	170
1-Bromopropane	0.0029	0.606502	0.972522	0.000434	0.0336288	0.999855	171
1-Butanamine	0.008855	4.10623	0.540018	0.005889	8.45822	0.441973	172
1-Butanol	0.01941	2.72304	0.559674	0.009224	2.90457	0.575812	173
1-Buten-3-yne	0.015439	1.77594	0.937568	0.002818	0.190648	0.999669	174
1-Butene	0.002486	0.361094	0.983839	0.000431	0.0135267	0.99992	175
1-Butyne	0.009745	1.33622	0.947092	0.001675	0.106306	0.999712	176
1-Chloro-1,1-difluoroethane	0.005228	0.768596	0.971823	0.00091	0.0529611	0.999852	177
1-Chloro-2,4-dinitrobenzene	0.001062	1.11685	0.903462	7.7e-05	0.251337	0.997883	178
1-Chloro-2-propanol	0.028685	3.09182	0.613627	0.014818	5.18664	0.656435	179
1-Chloro-3-propanol	0.044305	2.84445	0.508731	0.013709	4.79405	0.72052	180
1-Chlorobutane	0.001076	0.422531	0.977446	0.000141	0.02041	0.999883	181
1-Chlorodibenzo-p-dioxin	2.4e-05	0.237125	0.976818	1e-06	0.013749	0.999877	182
1-Chlorohexane	9.6e-05	0.218399	0.98277	7e-06	0.0086055	0.999916	183
1-Chloronaphthalene	0.000116	0.260627	0.979819	8e-06	0.0133185	0.9999	184
1-Chlorooctane	9e-06	0.137719	0.985215	0	0.00469242	0.999933	185
1-Chloropentane	0.000322	0.297754	0.980671	3.3e-05	0.0129969	0.999901	186
1-Chloropropane	0.003797	0.646998	0.972154	0.000603	0.0361099	0.999853	187
1-Chlorotetradecane	0	0.0605186	0.988195	0	0.00156661	0.999955	188
1-cis-2-trans-3-Trimethylcyclopentane.coskf	4.1e-05	0.0659051	0.99275	3e-06	0.00103826	0.999973	189
1-cis-2-trans-4-Trimethylcyclopentane.coskf	3.8e-05	0.064874	0.992829	3e-06	0.0010024	0.999974	190
1-Decanol	2.5e-05	0.737527	0.854339	3e-06	0.753966	0.870328	191
1-Decene	2e-06	0.0813696	0.989698	0	0.00195664	0.999958	192
1-Decyne	1e-05	0.187088	0.980512	0	0.00858814	0.999898	193
1-Dodecanol	3e-06	0.527255	0.878887	0	0.527065	0.898279	194
1-Dodecene	0	0.0625854	0.990182	0	0.00138696	0.999963	195
1-Eicosanol	0	0.210097	0.92466	0	0.194731	0.948099	196
1-Eicosene	0	0.0333584	0.990701	0	0.000622723	0.99997	197
1-Ethoxy-2-propanol	0.012847	2.65329	0.544597	0.009739	3.1389	0.457951	198
1-Ethyl-2-isopropylbenzene	2.3e-05	0.146686	0.984454	1e-06	0.00517733	0.99993	199
1-Ethylcyclohexene	7.2e-05	0.112117	0.989892	6e-06	0.00274213	0.999955	200
1-Ethylnaphthalene	4.8e-05	0.209137	0.980756	3e-06	0.00936748	0.999908	201
1-Ethyltetralin	2.2e-05	0.149214	0.98373	1e-06	0.00547515	0.999925	202
1-Heptadecanol	0	0.276323	0.913504	0	0.258797	0.936029	203
1-Heptadecene	0	0.0400523	0.990625	0	0.000780763	0.999969	204
1-Heptanol	0.000568	1.37473	0.786747	0.000137	1.31944	0.804531	205
1-Heptene	7.3e-05	0.1422	0.988081	6e-06	0.00402327	0.999947	206
1-Heptyne	0.000275	0.397315	0.973434	2.4e-05	0.0224969	0.99985	207
1-Hexadecanol	0	0.290525	0.915359	0	0.316785	0.928921	208
1-Hexadecene	0	0.0435244	0.990538	0	0.000873736	0.999967	209
1-Hexanamine	0.00107	3.17584	0.620676	0.000462	7.70447	0.514648	210
1-Hexanol	0.001852	1.85624	0.736091	0.000646	1.9294	0.741707	211
1-Hexene	0.000237	0.186424	0.987012	2.5e-05	0.00572072	0.99994	212
1-Hexyne	0.00088	0.556788	0.969053	9.7e-05	0.0344301	0.999822	213
1H-Imidazole.coskf	miscible	#VALUE!	miscible	miscible	#VALUE!	miscible	214
1-Isopropoxy-2-propanol	0.002744	2.42426	0.685603	0.002543	4.02323	0.491712	215
1-Methoxy-2-propanol_propanoate	0.001549	2.01213	0.752522	0.001792	4.40845	0.716256	216
1-Methyl-1-ethylcyclopentane	4.4e-05	0.0662506	0.992759	3e-06	0.00104086	0.999973	217
1-Methyl-2-nitrobenzene	0.001726	1.20428	0.905279	0.000319	0.7339	0.990474	218
1-Methyl-2-n-propylbenzene	5.5e-05	0.184928	0.983005	3e-06	0.00718361	0.99992	219
1-Methyl-3-hydroxy-5-isopropyl_benzene.coskf	0.000531	1.95542	0.773731	0.000116	6.44226	0.755196	220
1-Methyl-3-hydroxy-6-isopropyl_benzene.coskf	0.00081	2.08449	0.760517	0.000184	6.62108	0.750448	221
1-Methyl-3-(methylethoxy)benzene	8.4e-05	0.40333	0.961394	7e-06	0.185645	0.997256	222
1-Methyl-3-nitrobenzene	0.001262	1.0467	0.919594	0.000197	0.488071	0.994007	223
1-Methyl-3-n-propylbenzene	3.5e-05	0.16106	0.984589	2e-06	0.00569506	0.99993	224
1-Methyl-4-n-propylbenzene	3.2e-05	0.157168	0.98486	2e-06	0.00547427	0.999932	225
1-Methyl-4-vinylcyclohexene	7.9e-05	0.174563	0.984429	6e-06	0.00613519	0.999927	226
1-Methylcyclohexanol	0.003556	1.97861	0.695194	0.001377	2.52753	0.638309	227
1-Methylcyclohexene	0.0002	0.138018	0.989401	2.1e-05	0.00352719	0.999952	228
1-Methylcyclopentene	0.000517	0.183113	0.988418	6.7e-05	0.00512663	0.999946	229
1-Methylindan	0.000109	0.212442	0.982035	8e-06	0.00862988	0.999913	230
1-Methylindene	0.000207	0.302218	0.977439	1.7e-05	0.0150498	0.999887	231
1-Methylnaphthalene	0.000136	0.277019	0.978113	1e-05	0.013879	0.999892	232
1-Methylpiperidine	0.000847	1.78642	0.802796	0.00029	4.08866	0.695331	233
1-Methyltetralin	5.9e-05	0.180991	0.982732	4e-06	0.00702912	0.999918	234
1-Methylvinyl_acetate	0.006919	2.05195	0.833888	0.002345	1.87654	0.968113	235
1-n-Butylnaphthalene	6e-06	0.144699	0.982886	0	0.00578743	0.999923	236
1-n-Decylnaphthalene	0	0.0649249	0.986662	0	0.00190393	0.999949	237
1-n-Hexyl-1,2,3,4-tetrahydronaphthalene.coskf	0	0.0799015	0.98667	0	0.00236085	0.999946	238
1-n-Hexylnaphthalene	1e-06	0.103514	0.98475	0	0.00360665	0.999936	239
1-Nitrobutane	0.005152	1.6396	0.888714	0.000859	0.668272	0.993853	240
1-Nitropropane	0.013739	2.0948	0.858554	0.003093	0.921656	0.992253	241
1-n-Nonylnaphthalene	0	0.0715639	0.986312	0	0.00217458	0.999947	242
1-Nonadecanol	0	0.223601	0.92301	0	0.201534	0.946858	243
1-Nonadecene	0	0.0352078	0.990693	0	0.000664264	0.99997	244
1-Nonanol	6.8e-05	0.890912	0.837655	1e-05	0.911438	0.851787	245
1-Nonene	7e-06	0.0951435	0.989319	0	0.00239755	0.999955	246
1-Nonyne	3.1e-05	0.233005	0.978803	1e-06	0.011406	0.999886	247
1-n-Pentylnaphthalene	2e-06	0.12056	0.983979	0	0.00445366	0.99993	248
1-n-Propylnaphthalene	1.8e-05	0.173732	0.981788	1e-06	0.00740132	0.999915	249
1-Octadecanol	0	0.250564	0.917724	0	0.236334	0.940252	250
1-Octadecene	0	0.0375081	0.990666	0	0.000719968	0.999969	251
1-Octanol	0.000186	1.07911	0.816739	3.5e-05	1.03252	0.836185	252
1-Octene	2.3e-05	0.114611	0.988782	1e-06	0.00305471	0.999951	253
1-Octyne	8.7e-05	0.295619	0.976621	6e-06	0.0154516	0.999871	254
1-Pentadecanol	0	0.347709	0.90257	0	0.329669	0.924895	255
1-Pentadecene	0	0.0467295	0.990508	0	0.000951544	0.999967	256
1-Pentanamine	0.002843	3.60555	0.60397	0.001341	8.55531	0.500573	257
1-Pentanol	0.005812	2.26798	0.681179	0.001973	2.3102	0.696838	258
1-Pentene-3-yne	0.003753	0.841645	0.964332	0.000522	0.0563072	0.999811	259
1-Pentene-4-yne	0.006571	1.35664	0.940929	0.000855	0.120041	0.999673	260
1-Pentene	0.000716	0.244724	0.985982	9.6e-05	0.00806927	0.999933	261
1-Pentyne	0.00297	0.825722	0.961747	0.000392	0.0567956	0.999782	262
1-Phenyl-1-propanol	0.000948	1.48342	0.828493	0.000179	1.55047	0.907132	263
1-Phenyl-2-propanol	0.001263	1.85257	0.779536	0.000487	3.64453	0.7369	264
1-Phenylethanone	0.004819	2.15755	0.786217	0.002304	4.19045	0.847005	265
1-Phenylindene	3e-05	0.288246	0.970921	1e-06	0.017548	0.999848	266
1-Phenylnaphthalene	1.1e-05	0.205214	0.977316	0	0.010633	0.99989	267
1-Propanamine	0.032371	3.67943	0.434111	0.022923	6.16613	0.347033	268
1-Propanol	0.121124	1.57138	0.301227	0.055009	2.33622	0.366389	269
1-Propoxypropane	0.000372	1.06511	0.887236	0.000168	2.64924	0.784867	270
1-Propyl_acrylate	0.001565	1.42169	0.875762	0.000598	1.29729	0.970593	271
1-tert-Butoxy-2-[2-(hydroxy)propoxy]propane.coskf	0.000152	1.55499	0.71696	0.000134	3.58147	0.485064	272
1-Tetradecanol	0	0.393401	0.896301	0	0.383303	0.91711	273
1-Tetradecene	0	0.0512918	0.990395	0	0.00107797	0.999965	274
1-trans-3,5-Trimethylcyclohexane	2.2e-05	0.0617413	0.992524	1e-06	0.00100084	0.999973	275
1-Tridecanoic_acid	7e-06	0.756565	0.815933	1e-06	0.632012	0.858699	276
1-Tridecanol	1e-06	0.445365	0.88991	0	0.43406	0.910965	277
1-Tridecene	0	0.0564941	0.990289	0	0.00121965	0.999964	278
1-Undecanol	8e-06	0.613908	0.868116	1e-06	0.617601	0.886304	279
1-Undecene	1e-06	0.0710659	0.989954	0	0.00164726	0.99996	280
2-2-2-Butoxyethoxy-ethoxy-ethanol	0.000136	1.40618	0.708129	0.000106	2.21627	0.653986	281
2,2',2''-Nitrilotrisacetonitrile	0.057431	1.5706	0.377842	0.001879	1.13583	0.956605	282
2,2,2-Trifluoroethanol	miscible	#VALUE!	miscible	0.140041	2.23861	0.274944	283
2,2',3,3',4,4',5,5',6-Nonachlorobiphenyl.coskf	0	0.0609336	0.987254	0	0.0018369	0.99995	284
2,2',3,3',4,4',5,5'-Octachlorobiphenyl.coskf	0	0.0724639	0.986063	0	0.00247338	0.999943	285
2,2',3,3',4,4',5,6,6'-Nonachlorobiphenyl.coskf	0	0.0568731	0.987829	0	0.00163141	0.999953	286
2,2',3,3',4,4',5,6-Octachlorobiphenyl.coskf	0	0.0745629	0.985898	0	0.00255647	0.999942	287
2,2',3,3',4,4',5,6'-Octachlorobiphenyl.coskf	0	0.0725237	0.986062	0	0.00251905	0.999942	288
2,2',3,3',4,4',5-Heptachlorobiphenyl.coskf	0	0.0876472	0.984774	0	0.00334952	0.999935	289
2,2',3,3',4,4',6,6'-Octachlorobiphenyl.coskf	0	0.0701161	0.986405	0	0.00238383	0.999944	290
2,2',3,3',4,4',6-Heptachlorobiphenyl.coskf	0	0.0892436	0.984602	0	0.00349871	0.999933	291
2,2',3,3',4,4'-Hexachlorobiphenyl	0	0.107263	0.983289	0	0.00458874	0.999925	292
2,2',3,3',4,5,5',6,6'-Nonachlorobiphenyl.coskf	0	0.0592618	0.987552	0	0.00175276	0.999951	293
2,2',3,3',4,5,5',6-Octachlorobiphenyl.coskf	0	0.0735783	0.985948	0	0.00255996	0.999942	294
2,2',3,3',4,5,5',6'-Octachlorobiphenyl.coskf	0	0.0754439	0.985696	0	0.00271571	0.99994	295
2,2',3,3',4,5,5'-Heptachlorobiphenyl.coskf	0	0.0875453	0.984726	0	0.00341508	0.999934	296
2,2',3,3',4,5,6,6'-Octachlorobiphenyl.coskf	0	0.0743404	0.986009	0	0.00255945	0.999942	297
2,2',3,3',4,5',6,6'-Octachlorobiphenyl.coskf	0	0.0730473	0.986076	0	0.00255991	0.999942	298
2,2',3,3',4,5,6-Heptachlorobiphenyl	0	0.0861071	0.985024	0	0.00315303	0.999937	299
2,2',3,3',4,5,6'-Heptachlorobiphenyl.coskf	0	0.0915284	0.984353	0	0.00368023	0.999931	300
2,2',3,3',4,5',6-Heptachlorobiphenyl.coskf	0	0.0893482	0.984567	0	0.00358124	0.999932	301
2,2',3,3',4,5',6'-Heptachlorobiphenyl.coskf	0	0.0927703	0.984212	0	0.00376056	0.99993	302
2,2',3,3',4,5-Hexachlorobiphenyl	0	0.102634	0.983787	0	0.00420325	0.999928	303
2,2',3,3',4,5'-Hexachlorobiphenyl	0	0.1072	0.983256	0	0.00467686	0.999924	304
2,2',3,3',4,6,6'-Heptachlorobiphenyl.coskf	0	0.0901631	0.984544	0	0.00360136	0.999932	305
2,2',3,3',4,6-Hexachlorobiphenyl	0	0.106494	0.983401	0	0.00451341	0.999926	306
2,2',3,3',4,6'-Hexachlorobiphenyl	1e-06	0.114613	0.982562	0	0.00521646	0.99992	307
2,2',3,3',4-Pentachlorobiphenyl	1e-06	0.130501	0.981838	0	0.00610541	0.999915	308
2,2',3,3',5,5',6,6'-Octachlorobiphenyl.coskf	0	0.0735963	0.985991	0	0.00261279	0.999941	309
2,2',3,3',5,5',6-Heptachlorobiphenyl.coskf	0	0.0918828	0.984257	0	0.00378125	0.99993	310
2,2',3,3',5,5'-Hexachlorobiphenyl	0	0.106967	0.983219	0	0.00476198	0.999923	311
2,2',3,3',5,6,6'-Heptachlorobiphenyl.coskf	0	0.0939667	0.984174	0	0.00386427	0.99993	312
2,2',3,3',5,6-Hexachlorobiphenyl	0	0.108879	0.983111	0	0.00471803	0.999924	313
2,2',3,3',5,6'-Hexachlorobiphenyl	0	0.113448	0.982651	0	0.00524222	0.999919	314
2,2',3,3',5-Pentachlorobiphenyl	1e-06	0.127516	0.982049	0	0.00597525	0.999916	315
2,2',3,3',6,6'-Hexachlorobiphenyl	1e-06	0.117706	0.982331	0	0.00551492	0.999918	316
2,2',3,3',6-Pentachlorobiphenyl	2e-06	0.138077	0.981136	0	0.00679815	0.99991	317
2,2',3,3'-Tetrachlorobiphenyl	3e-06	0.157575	0.980352	0	0.00795987	0.999905	318
2,2,3,3-Tetramethylbutane	6.3e-05	0.0794958	0.991623	5e-06	0.00151564	0.999967	319
2,2,3,3-Tetramethylhexane	8e-06	0.0581376	0.992011	0	0.00101291	0.999971	320
2,2,3,3-Tetramethylpentane	2.4e-05	0.0655446	0.991981	1e-06	0.00116402	0.99997	321
2,2',3,4,4',5,5',6-Octachlorobiphenyl.coskf	0	0.0750544	0.985744	0	0.00267296	0.99994	322
2,2',3,4,4',5,5'-Heptachlorobiphenyl.coskf	0	0.0892128	0.984539	0	0.00353461	0.999932	323
2,2',3,4,4',5,6,6'-Octachlorobiphenyl.coskf	0	0.0696198	0.986576	0	0.00231668	0.999945	324
2,2',3,4,4',5,6-Heptachlorobiphenyl	0	0.0883257	0.984742	0	0.00338035	0.999935	325
2,2',3,4,4',5,6'-Heptachlorobiphenyl.coskf	0	0.0866002	0.984894	0	0.00340469	0.999934	326
2,2',3,4,4',5',6-Heptachlorobiphenyl.coskf	0	0.0906624	0.98439	0	0.00369018	0.999931	327
2,2',3,4,4',5-Hexachlorobiphenyl	0	0.104302	0.983593	0	0.00440814	0.999927	328
2,2',3,4,4',5'-Hexachlorobiphenyl	0	0.10915	0.983051	0	0.00482424	0.999923	329
2,2',3,4,4',6,6'-Heptachlorobiphenyl.coskf	0	0.0858531	0.98503	0	0.00335458	0.999935	330
2,2',3,4,4',6-Hexachlorobiphenyl	0	0.109436	0.983074	0	0.00485466	0.999923	331
2,2',3,4,4',6'-Hexachlorobiphenyl	0	0.107591	0.983269	0	0.00474739	0.999924	332
2,2',3,4,4'-Pentachlorobiphenyl	1e-06	0.130324	0.981817	0	0.00620855	0.999915	333
2,2',3,4,5,5',6-Heptachlorobiphenyl	0	0.0913371	0.984376	0	0.0036024	0.999932	334
2,2',3,4',5,5',6-Heptachlorobiphenyl.coskf	0	0.0940137	0.984006	0	0.00395573	0.999928	335
2,2',3,4,5,5'-Hexachlorobiphenyl	0	0.108908	0.983093	0	0.00478549	0.999923	336
2,2',3,4',5,5'-Hexachlorobiphenyl	0	0.108837	0.983024	0	0.00490598	0.999922	337
2,2',3,4,5,6,6'-Heptachlorobiphenyl	0	0.0856379	0.985217	0	0.00312677	0.999938	338
2,2',3,4',5,6,6'-Heptachlorobiphenyl.coskf	0	0.0879717	0.984804	0	0.00351137	0.999933	339
2,2',3,4,5,6-Hexachlorobiphenyl	1e-06	0.0997581	0.984149	0	0.00385589	0.999932	340
2,2',3,4,5,6'-Hexachlorobiphenyl	0	0.105948	0.983508	0	0.00450803	0.999926	341
2,2',3,4,5',6-Hexachlorobiphenyl	0	0.112163	0.982774	0	0.00507154	0.999921	342
2,2',3,4',5,6-Hexachlorobiphenyl	0	0.111288	0.98286	0	0.00502446	0.999921	343
2,2',3,4',5,6'-Hexachlorobiphenyl	0	0.106939	0.983293	0	0.00481662	0.999923	344
2,2',3,4',5',6-Hexachlorobiphenyl	0	0.115935	0.982404	0	0.00543806	0.999918	345
2,2',3,4,5-Pentachlorobiphenyl	1e-06	0.118148	0.982967	0	0.00505587	0.999923	346
2,2',3,4,5'-Pentachlorobiphenyl	1e-06	0.13557	0.981303	0	0.00667312	0.999911	347
2,2',3,4',5-Pentachlorobiphenyl	1e-06	0.131507	0.981673	0	0.00644659	0.999913	348
2,2',3,4',5'-Pentachlorobiphenyl	1e-06	0.128602	0.98191	0	0.00607337	0.999915	349
2,2',3,4,6,6'-Hexachlorobiphenyl	1e-06	0.107032	0.983446	0	0.00458384	0.999926	350
2,2',3,4',6,6'-Hexachlorobiphenyl	1e-06	0.111394	0.982954	0	0.00508464	0.999921	351
2,2',3,4,6-Pentachlorobiphenyl	1e-06	0.125236	0.982293	0	0.0056231	0.999919	352
2,2',3,4,6'-Pentachlorobiphenyl	1e-06	0.133154	0.981598	0	0.00638875	0.999914	353
2,2',3,4',6-Pentachlorobiphenyl	1e-06	0.141245	0.98084	0	0.00721199	0.999908	354
2,2',3,4',6'-Pentachlorobiphenyl	1e-06	0.129858	0.981892	0	0.00619682	0.999915	355
2,2',3,4-Tetrachlorobiphenyl	3e-06	0.15143	0.980831	0	0.00739198	0.999909	356
2,2',3,4'-Tetrachlorobiphenyl	3e-06	0.157424	0.980322	0	0.00810465	0.999905	357
2,2,3,4-Tetramethylpentane	2e-05	0.0630511	0.992138	1e-06	0.00108549	0.999971	358
2,2',3,5,5',6-Hexachlorobiphenyl	0	0.114987	0.982478	0	0.00531894	0.999919	359
2,2',3,5,5'-Pentachlorobiphenyl	1e-06	0.134398	0.981367	0	0.00670482	0.999911	360
2,2',3,5,6,6'-Hexachlorobiphenyl	1e-06	0.109297	0.983231	0	0.0047666	0.999924	361
2,2',3,5,6-Pentachlorobiphenyl	1e-06	0.128203	0.982003	0	0.00589455	0.999916	362
2,2',3,5,6'-Pentachlorobiphenyl	1e-06	0.131575	0.981727	0	0.00639075	0.999914	363
2,2',3,5',6-Pentachlorobiphenyl	1e-06	0.14609	0.980418	0	0.00766092	0.999904	364
2,2',3,5-Tetrachlorobiphenyl	2e-06	0.148816	0.981027	0	0.00731681	0.999909	365
2,2',3,5'-Tetrachlorobiphenyl	3e-06	0.162927	0.979826	0	0.00860647	0.999901	366
2,2',3,6,6'-Pentachlorobiphenyl	2e-06	0.140458	0.981034	0	0.00703056	0.999909	367
2,2',3,6-Tetrachlorobiphenyl	4e-06	0.164929	0.979673	0	0.00858792	0.999901	368
2,2',3,6'-Tetrachlorobiphenyl	4e-06	0.165011	0.979765	0	0.00863092	0.999902	369
2,2',3-Trichlorobiphenyl	7e-06	0.184837	0.978998	0	0.00973115	0.999897	370
2,2,3-Trimethylbutane	9.6e-05	0.0826536	0.992036	8e-06	0.0014856	0.999969	371
2,2,3-Trimethylhexane	1.1e-05	0.0614062	0.992199	1e-06	0.00104574	0.999972	372
2,2,3-Trimethylpentane	3.4e-05	0.0703639	0.992132	2e-06	0.00123497	0.99997	373
2,2',4,4',5,5'-Hexachlorobiphenyl	0	0.110145	0.982879	0	0.00499956	0.999921	374
2,2',4,4',5,6'-Hexachlorobiphenyl	0	0.108766	0.983094	0	0.00497598	0.999921	375
2,2',4,4',5-Pentachlorobiphenyl	1e-06	0.130051	0.981764	0	0.00632469	0.999913	376
2,2'4,4'6,6'-Hexachlorobiphenyl	0	0.103211	0.983709	0	0.00456205	0.999925	377
2,2,4,4,6,8,8-Heptamethylnonane	0	0.0363306	0.991814	0	0.000604672	0.999973	378
2,2',4,4',6-Pentachlorobiphenyl	1e-06	0.132666	0.981615	0	0.00659289	0.999912	379
2,2',4,4'-Tetrachlorobiphenyl	2e-06	0.160011	0.980126	0	0.00848623	0.999903	380
2,2,4,4-Tetramethyl-1,3-cyclobutanediol.coskf	0.005807	2.05845	0.580267	0.001587	1.97994	0.671827	381
2,2,4,4-Tetramethylpentane	2e-05	0.066671	0.991806	1e-06	0.00121365	0.999969	382
2,2',4,5,5'-Pentachlorobiphenyl	1e-06	0.136185	0.981177	0	0.00685102	0.999909	383
2,2',4,5,6'-Pentachlorobiphenyl	1e-06	0.135358	0.981396	0	0.006723	0.999911	384
2,2',4,5',6-Pentachlorobiphenyl	1e-06	0.136443	0.981234	0	0.00694813	0.999909	385
2,2',4,5-Tetrachlorobiphenyl	2e-06	0.149524	0.980912	0	0.00736936	0.999909	386
2,2',4,5'-Tetrachlorobiphenyl	2e-06	0.165486	0.979593	0	0.00898918	0.999899	387
2,2',4,6,6'-Pentachlorobiphenyl	1e-06	0.129796	0.981926	0	0.00626098	0.999915	388
2,2',4,6-Tetrachlorobiphenyl	3e-06	0.154869	0.980554	0	0.00783973	0.999906	389
2,2',4,6'-Tetrachlorobiphenyl	4e-06	0.168379	0.979439	0	0.00913257	0.999899	390
2,2',4-Trichlorobiphenyl	6e-06	0.187696	0.978777	0	0.0101642	0.999895	391
2,2,4-Trimethyl-1,3-pentanediol	0.002894	1.87517	0.658047	0.001017	1.99226	0.690041	392
2,2,4-Trimethyl-1,3-pentanediol_diisobutyrate.coskf	4e-06	0.490203	0.881558	1e-06	0.818404	0.922236	393
2,2,4-Trimethylhexane	1.1e-05	0.0596438	0.992308	1e-06	0.000996171	0.999972	394
2,2,4-Trimethylpentane	3.2e-05	0.0702215	0.992127	2e-06	0.001228	0.99997	395
2,2',5,5'-Tetrachlorobiphenyl	3e-06	0.172348	0.978908	0	0.00961298	0.999895	396
2,2,5,5-Tetramethylhexane	5e-06	0.0573797	0.991966	0	0.00100126	0.999971	397
2,2',5,6'-Tetrachlorobiphenyl	4e-06	0.171238	0.979126	0	0.00943164	0.999897	398
2,2',5-Trichlorobiphenyl	7e-06	0.194792	0.978136	0	0.0107894	0.999892	399
2,2,5-Trimethylhexane	9e-06	0.0607493	0.992217	0	0.00102874	0.999972	400
2,2',6,6'-Tetrachlorobiphenyl	5e-06	0.165595	0.979728	0	0.0087735	0.999901	401
2,2',6-Trichlorobiphenyl	1.1e-05	0.202011	0.977599	0	0.0112494	0.999889	402
2-2-Butoxyethoxy-ethanol	0.000683	1.75057	0.68546	0.000454	2.41375	0.633292	403
2,2-Dichloro-1,1,1-trifluoroethane	0.001258	0.685013	0.971034	0.000184	0.0770731	0.999807	404
2,2-Dichloro-1,1,2-trifluoroethane	0.001461	0.697845	0.970356	0.000215	0.0708396	0.999812	405
2,2'-Dichlorobiphenyl	2.1e-05	0.230085	0.976625	1e-06	0.0128867	0.999884	406
2,2-Dimethyl-1-propanol	0.008794	2.35537	0.686043	0.004246	2.64289	0.692172	407
2,2-Dimethyl-3-ethylpentane	1.5e-05	0.0609332	0.992267	1e-06	0.00102451	0.999972	408
2,2-Dimethylbutane	0.00018	0.0922962	0.992189	1.9e-05	0.00163554	0.999969	409
2,2-Dimethylheptane	6e-06	0.0576975	0.992429	0	0.000941443	0.999973	410
2,2-Dimethylhexane	1.8e-05	0.0654498	0.9924	1e-06	0.00108946	0.999972	411
2,2-Dimethyloctane	2e-06	0.0514581	0.992446	0	0.000823901	0.999974	412
2,2-Dimethylpentane	5.7e-05	0.0769024	0.992308	4e-06	0.00131506	0.999971	413
2,2-Dimethylpropane	0.000453	0.11492	0.991952	6e-05	0.00215471	0.999966	414
2,2-Diphenyl_propane	1.4e-05	0.205129	0.976194	0	0.0103545	0.999882	415
2-2-Ethoxyethoxy-ethanol	0.006001	2.48066	0.559514	0.006426	3.09104	0.451842	416
2-2-Hexoxyethoxy-ethanol	8.2e-05	1.17198	0.760458	3.3e-05	1.57429	0.745116	417
2,2'-Iminobis-acetonitrile	miscible	#VALUE!	miscible	0.031018	2.9521	0.634306	418
2-2-Methoxyethoxy-ethanol	0.020623	2.58397	0.418649	0.036393	2.10882	0.23768	419
2-(2-Pentoxyethoxy)ethanol	0.000215	1.74621	0.713526	0.000295	3.99749	0.477545	420
2,3,3,3-Tetrafluoropropene	0.00179	0.44717	0.981256	0.0003	0.0258755	0.999898	421
2,3,3',4,4',5,5',6-Octachlorobiphenyl.coskf	0	0.0731092	0.986008	0	0.00249459	0.999943	422
2,3,3',4,4',5,5'-Heptachlorobiphenyl.coskf	0	0.0805772	0.985672	0	0.00287204	0.99994	423
2,3,3',4,4',5,6-Heptachlorobiphenyl	0	0.0896146	0.984551	0	0.00343012	0.999934	424
2,3,3',4,4',5',6-Heptachlorobiphenyl.coskf	0	0.088404	0.984659	0	0.00348009	0.999933	425
2,3,3',4,4',5-Hexachlorobiphenyl	0	0.096787	0.984458	0	0.00379344	0.999932	426
2,3,3',4,4',5'-Hexachlorobiphenyl	0	0.096959	0.984462	0	0.00383205	0.999932	427
2,3,3',4,4',6-Hexachlorobiphenyl	0	0.109494	0.983052	0	0.00480227	0.999923	428
2,3,3',4,4'-Pentachlorobiphenyl	1e-06	0.117921	0.983055	0	0.00513405	0.999923	429
2,3,3',4,5,5',6-Heptachlorobiphenyl	0	0.0869593	0.984862	0	0.00331058	0.999935	430
2,3,3',4',5,5',6-Heptachlorobiphenyl.coskf	0	0.0913593	0.984281	0	0.00370987	0.99993	431
2,3,3',4,5,5'-Hexachlorobiphenyl	0	0.0962057	0.984497	0	0.0038219	0.999932	432
2,3,3',4',5,5'-Hexachlorobiphenyl	0	0.0984897	0.984238	0	0.00402058	0.99993	433
2,3,3',4,5,6-Hexachlorobiphenyl	0	0.103314	0.983744	0	0.0041348	0.999929	434
2,3,3',4,5',6-Hexachlorobiphenyl	0	0.107705	0.983261	0	0.00474696	0.999924	435
2,3,3',4',5,6-Hexachlorobiphenyl	0	0.112262	0.982719	0	0.00503232	0.999921	436
2,3,3',4',5',6-Hexachlorobiphenyl	0	0.111462	0.982851	0	0.00502745	0.999921	437
2,3,3',4,5-Pentachlorobiphenyl	1e-06	0.111323	0.983704	0	0.00455593	0.999928	438
2,3,3',4,5'-Pentachlorobiphenyl	1e-06	0.116969	0.983135	0	0.00515276	0.999923	439
2,3,3',4',5-Pentachlorobiphenyl	1e-06	0.11974	0.982835	0	0.0053718	0.999921	440
2,3,3',4',5'-Pentachlorobiphenyl	1e-06	0.114631	0.983408	0	0.00486818	0.999925	441
2,3,3',4,6-Pentachlorobiphenyl	1e-06	0.125372	0.982241	0	0.00568438	0.999918	442
2,3,3',4',6-Pentachlorobiphenyl	1e-06	0.139946	0.98091	0	0.00704518	0.999908	443
2,3,3',4-Tetrachlorobiphenyl	2e-06	0.138901	0.982005	0	0.00639773	0.999916	444
2,3,3',4'-Tetrachlorobiphenyl	2e-06	0.141905	0.981752	0	0.00668195	0.999914	445
2,3,3,4-Tetramethylpentane	2.2e-05	0.0630323	0.992145	1e-06	0.00108363	0.999971	446
2,3,3',5,5',6-Hexachlorobiphenyl	0	0.110348	0.98295	0	0.00497896	0.999921	447
2,3,3',5,5'-Pentachlorobiphenyl	0	0.118839	0.982898	0	0.00540429	0.999921	448
2,3,3',5,6-Pentachlorobiphenyl	1e-06	0.13019	0.981771	0	0.00608799	0.999915	449
2,3,3',5',6-Pentachlorobiphenyl	1e-06	0.136487	0.981277	0	0.00686257	0.99991	450
2,3,3',5-Tetrachlorobiphenyl	2e-06	0.139007	0.981954	0	0.00652671	0.999915	451
2,3,3',5'-Tetrachlorobiphenyl	2e-06	0.140193	0.981893	0	0.00665351	0.999915	452
2,3,3',6-Tetrachlorobiphenyl	3e-06	0.16419	0.979721	0	0.00860762	0.999901	453
2,3,3'-Trichlorobiphenyl	5e-06	0.169341	0.980514	0	0.00844767	0.999906	454
2,3,3-Trimethyl-1-butene	0.0002	0.159661	0.987202	2e-05	0.00479411	0.999941	455
2,3,3-Trimethylpentane	3.7e-05	0.0689019	0.992271	2e-06	0.00117692	0.999971	456
2,3',4,4',5,5'-Hexachlorobiphenyl	0	0.0975686	0.984376	0	0.00394739	0.999931	457
2,3,4,4',5,6-Hexachlorobiphenyl	0	0.106822	0.983384	0	0.00439661	0.999927	458
2,3',4,4',5',6-Hexachlorobiphenyl	0	0.103805	0.983616	0	0.00450406	0.999926	459
2,3,4,4',5-Pentachlorobiphenyl	1e-06	0.116171	0.983256	0	0.0049249	0.999925	460
2,3',4,4',5-Pentachlorobiphenyl	1e-06	0.117841	0.983051	0	0.00522307	0.999922	461
2,3',4,4',5'-Pentachlorobiphenyl	1e-06	0.114592	0.983433	0	0.0049575	0.999925	462
2,3,4,4',6-Pentachlorobiphenyl	1e-06	0.129105	0.981868	0	0.00600128	0.999916	463
2,3',4,4',6-Pentachlorobiphenyl	1e-06	0.131015	0.981743	0	0.0063914	0.999913	464
2,3,4,4'-Tetrachlorobiphenyl	2e-06	0.144562	0.981537	0	0.00686896	0.999913	465
2,3',4,4'-Tetrachlorobiphenyl	2e-06	0.141651	0.981807	0	0.00678892	0.999914	466
2,3',4,5,5'-Pentachlorobiphenyl	0	0.117751	0.983045	0	0.0053154	0.999922	467
2,3',4',5,5'-Pentachlorobiphenyl	1e-06	0.119762	0.982905	0	0.00537257	0.999921	468
2,3,4,5,6-Pentachlorobiphenyl	1e-06	0.111041	0.983598	0	0.00431989	0.999929	469
2,3,4',5,6-Pentachlorobiphenyl	1e-06	0.133641	0.981421	0	0.00640069	0.999912	470
2,3',4,5',6-Pentachlorobiphenyl	1e-06	0.126683	0.982129	0	0.00614943	0.999915	471
2,3',4',5',6-Pentachlorobiphenyl	1e-06	0.123744	0.98243	0	0.00570109	0.999919	472
2,3,4,5-Tetrachlorobiphenyl	2e-06	0.123371	0.98336	0	0.00500819	0.999926	473
2,3,4',5-Tetrachlorobiphenyl	2e-06	0.144771	0.981485	0	0.00700782	0.999912	474
2,3',4,5-Tetrachlorobiphenyl	2e-06	0.138267	0.982061	0	0.00644649	0.999916	475
2,3',4,5'-Tetrachlorobiphenyl	1e-06	0.140043	0.981933	0	0.00678558	0.999914	476
2,3',4',5-Tetrachlorobiphenyl	2e-06	0.147367	0.981284	0	0.00726778	0.999911	477
2,3',4',5'-Tetrachlorobiphenyl	2e-06	0.129491	0.982913	0	0.00563671	0.999922	478
2,3,4,6-Tetrachlorobiphenyl	3e-06	0.139959	0.981663	0	0.00631111	0.999914	479
2,3,4',6-Tetrachlorobiphenyl	3e-06	0.170372	0.979137	0	0.00918487	0.999897	480
2,3',4,6-Tetrachlorobiphenyl	2e-06	0.153915	0.980632	0	0.00785209	0.999906	481
2,3',4',6-Tetrachlorobiphenyl	3e-06	0.16445	0.979786	0	0.00872377	0.999901	482
2,3,4-Trichlorobiphenyl	5e-06	0.15774	0.981339	0	0.00728828	0.999912	483
2,3,4'-Trichlorobiphenyl	6e-06	0.177136	0.979934	0	0.00912893	0.999902	484
2,3',4-Trichlorobiphenyl	4e-06	0.169264	0.980565	0	0.00859049	0.999906	485
2,3',4'-Trichlorobiphenyl	5e-06	0.16411	0.980967	0	0.00800667	0.999909	486
2,3,4-Trimethylpentane	3.2e-05	0.0675699	0.992323	2e-06	0.00114514	0.999971	487
2,3',5,5'-Tetrachlorobiphenyl	1e-06	0.146715	0.981339	0	0.00735999	0.99991	488
2,3,5,6-Tetrachlorobiphenyl	3e-06	0.145352	0.98121	0	0.00673955	0.999911	489
2,3',5',6-Tetrachlorobiphenyl	2e-06	0.157163	0.980436	0	0.00823622	0.999905	490
2,3,5-Trichlorobiphenyl	4e-06	0.156383	0.981436	0	0.00730915	0.999912	491
2,3',5-Trichlorobiphenyl	5e-06	0.175757	0.980038	0	0.00917851	0.999902	492
2,3',5'-Trichlorobiphenyl	4e-06	0.160381	0.98125	0	0.00783285	0.999911	493
2,3,5-Trimethylthiophene	0.000197	0.260009	0.980717	1.7e-05	0.0113743	0.999904	494
2,3,6-Trichlorobiphenyl	8e-06	0.186114	0.978706	0	0.00970919	0.999895	495
2,3',6-Trichlorobiphenyl	8e-06	0.198383	0.977931	0	0.0110672	0.999891	496
2,3-Butanediol.coskf	miscible	#VALUE!	miscible	miscible	#VALUE!	miscible	497
2,3-Butanedione	0.049709	2.55574	0.647663	0.019203	2.68579	0.942995	498
2,3-Dichloro-1-propanol	0.020623	3.06023	0.656873	0.006077	5.09543	0.842853	499
2,3-Dichlorobiphenyl	1.5e-05	0.198148	0.979301	1e-06	0.0100053	0.999899	500
2,3'-Dichlorobiphenyl	1.3e-05	0.201056	0.979263	0	0.0104635	0.999899	501
2,3-Dichlorobutane	0.000864	0.450459	0.973488	9.6e-05	0.0251492	0.999862	502
2,3-Dichloropropene	0.002313	0.695889	0.969921	0.000329	0.0499868	0.999836	503
2,3-Dihydrofuran	0.019266	2.18892	0.865168	0.007223	1.67975	0.981618	504
2,3-Dimethyl-1,3-butadiene	0.000719	0.294195	0.982597	9e-05	0.0118167	0.999915	505
2,3-Dimethyl-1-butene	0.00037	0.193103	0.986689	4.4e-05	0.00601334	0.999938	506
2,3-Dimethyl-1-hexene	4.5e-05	0.12277	0.988249	3e-06	0.00340552	0.999948	507
2,3-Dimethyl-2,3-diphenylbutane	2e-06	0.125151	0.980995	0	0.00524199	0.999912	508
2,3-Dimethyl-2-butene	0.000328	0.177947	0.987848	3.8e-05	0.00523901	0.999944	509
2,3-Dimethylbenzothiophene	8.8e-05	0.267238	0.977102	5e-06	0.0136614	0.999885	510
2,3-Dimethylbutane	0.000161	0.0890408	0.992356	1.6e-05	0.00153564	0.99997	511
2,3-Dimethyldecane	0	0.0416535	0.992516	0	0.000638965	0.999976	512
2,3-Dimethyldodecane	0	0.0355552	0.992499	0	0.000530807	0.999977	513
2,3-Dimethylheptane	6e-06	0.0572445	0.992476	0	0.000931629	0.999973	514
2,3-Dimethylhexane	1.8e-05	0.0634184	0.992565	1e-06	0.00102584	0.999973	515
2,3-Dimethylnonane	1e-06	0.0460723	0.992491	0	0.000722598	0.999975	516
2,3-Dimethyloctane	2e-06	0.0497641	0.992634	0	0.00077096	0.999975	517
2,3-Dimethylpentane	5.7e-05	0.0749387	0.992431	4e-06	0.00126385	0.999971	518
2,3-Dimethylthiophene	0.00072	0.400627	0.975847	8.1e-05	0.0211294	0.999875	519
2,3-Dimethylundecane	0	0.0371628	0.992646	0	0.000547934	0.999977	520
2,3-Epoxy-1-propanol.coskf	miscible	#VALUE!	miscible	miscible	#VALUE!	miscible	521
2,3-Pentadiene	0.001185	0.363026	0.982129	0.00017	0.0150854	0.999911	522
2,3-Xylenol	0.00249	1.89994	0.831678	0.000561	3.51632	0.884524	523
2,4,4',5-Tetrachlorobiphenyl	2e-06	0.143287	0.981625	0	0.00688443	0.999913	524
2,4,4',6-Tetrachlorobiphenyl	2e-06	0.151871	0.980778	0	0.00769658	0.999907	525
2,4,4'-Trichlorobiphenyl	5e-06	0.175748	0.980074	0	0.00917472	0.999903	526
2,4,4-Trimethyl-1-pentene	7.3e-05	0.117021	0.988873	5e-06	0.00307818	0.999951	527
2,4,4-Trimethyl-2-pentene	5.6e-05	0.114392	0.989096	4e-06	0.00296903	0.999953	528
2,4,4-Trimethylhexane	1.3e-05	0.0606275	0.992274	1e-06	0.00101955	0.999972	529
2,4,5-Trichlorobiphenyl	4e-06	0.156035	0.981469	0	0.00727669	0.999912	530
2,4',5-Trichlorobiphenyl	5e-06	0.182305	0.979462	0	0.00977296	0.999899	531
2,4,6-Trichlorobiphenyl	6e-06	0.173385	0.979886	0	0.00875959	0.999901	532
2,4',6-Trichlorobiphenyl	7e-06	0.197863	0.97787	0	0.0110833	0.99989	533
2,4,6-Triiodophenol	3.4e-05	0.410876	0.954621	3e-06	0.972635	0.979795	534
2,4,6-Trimethylpyridine	0.000951	2.67365	0.702362	0.000398	6.99426	0.579529	535
2,4,6-Trinitrophenol	0.00199	1.61646	0.825214	0.000111	0.916001	0.978495	536
2,4,6-Trinitrotoluene	0.000911	1.16393	0.87814	3.8e-05	0.243082	0.997433	537
2,4-Diaminotoluene	0.018204	3.7612	0.613992	0.007225	21.8699	0.824941	538
2,4-Dichlorobenzotrifluoride	5.4e-05	0.209729	0.982252	3e-06	0.0104667	0.999911	539
2,4-Dichlorobiphenyl	1.2e-05	0.196615	0.979482	0	0.0100869	0.999899	540
2,4'-Dichlorobiphenyl	1.4e-05	0.209773	0.978553	0	0.0112438	0.999895	541
2,4-Dichlorotoluene	0.000113	0.218914	0.98316	9e-06	0.00957102	0.999919	542
2,4-Dimethyl-1,3-dioxolane-2-methanol.coskf	0.012703	2.6253	0.578826	0.017106	3.33797	0.453353	543
2,4-Dimethyl-3-ethylpentane	1.3e-05	0.0599529	0.992342	1e-06	0.000998856	0.999972	544
2,4-Dimethylaniline	0.002543	2.0863	0.826778	0.000487	5.01205	0.925702	545
2,4-Dimethylhexane	1.7e-05	0.0619167	0.992675	1e-06	0.000976365	0.999974	546
2,4-Dimethyloctane	2e-06	0.0508211	0.992522	0	0.00080561	0.999974	547
2,4-Dimethylpentane	5e-05	0.0725643	0.992567	4e-06	0.00118663	0.999972	548
2,4-Dinitrophenol	0.028011	2.85311	0.309221	0.007598	8.36778	0.371603	549
2,4-Dinitrotoluene	0.001374	1.2259	0.884706	0.000143	0.415289	0.994614	550
2,4-Diphenyl-4-methyl-1-pentene	2e-06	0.152586	0.977766	0	0.00730479	0.999894	551
2,4-Pentanediol.coskf	miscible	#VALUE!	miscible	miscible	#VALUE!	miscible	552
2,4-Toluene_diisocyanate	6.2e-05	0.318222	0.973349	3e-06	0.0188907	0.999858	553
2,4-Xylenol	0.001876	1.79648	0.842072	0.000421	3.04949	0.898876	554
2,5-Dichlorobiphenyl	1.3e-05	0.20354	0.978892	0	0.0106794	0.999896	555
2,5-Dihydrofuran	0.04699	3.09092	0.580266	0.050336	3.34209	0.377302	556
2,5-Dimethyl-1,5-hexadiene	0.00011	0.229727	0.98143	8e-06	0.00956509	0.999908	557
2,5-Dimethyl-2,4-hexadiene	8.7e-05	0.20509	0.983186	6e-06	0.00792888	0.999919	558
2,5-Dimethylhexane	1.4e-05	0.0631424	0.992556	1e-06	0.0010214	0.999973	559
2,5-Dimethyloctane	2e-06	0.0494767	0.992619	0	0.000767582	0.999975	560
2,5-Dimethylthiophene	0.000582	0.377032	0.976735	6.3e-05	0.018966	0.99988	561
2,5-Dinitrotoluene	0.001262	1.18147	0.891454	0.000123	0.370729	0.995472	562
2,5-Xylenol	0.002979	3.04032	0.725543	0.000902	12.2543	0.708443	563
2,6,8-Trimethyl-4-nonanone	1.4e-05	0.570987	0.901008	3e-06	1.33527	0.887851	564
2,6-Diaminotoluene	0.024808	3.05007	0.501426	0.007576	11.523	0.672167	565
2,6-Dichlorobiphenyl	2.1e-05	0.228775	0.976554	1e-06	0.0126941	0.999883	566
2,6-Diethylaniline	0.000245	0.94347	0.906654	3.1e-05	1.72275	0.962877	567
2,6-Diethylnaphthalene	6e-06	0.160871	0.981312	0	0.00687987	0.999913	568
2,6-Dimethyl-4-heptanol	5.2e-05	0.609248	0.914554	9e-06	1.12419	0.903038	569
2,6-Dimethylheptane	5e-06	0.0557698	0.99258	0	0.000884902	0.999974	570
2,6-Dimethylnaphthalene	3.7e-05	0.207114	0.980756	2e-06	0.00931172	0.999908	571
2,6-Dimethyloctane	2e-06	0.0502102	0.992564	0	0.000786482	0.999975	572
2,6-Dimethylpyridine	0.002333	2.89594	0.717327	0.001099	7.60209	0.600284	573
2,6-Dinitrophenol	0.003576	1.63063	0.847548	0.000316	0.723464	0.987303	574
2,6-Dinitrotoluene	0.001586	1.27469	0.881522	0.000147	0.40793	0.995142	575
2,6-Di-tert-butyl-p-cresol	1e-06	0.163398	0.971247	0	0.506013	0.974737	576
2,6-Naphthalenedicarboxylic_acid	0.007675	2.65537	0.404687	0.002961	4.45749	0.422786	577
2,6-Pyridinedimethanol	0.045359	1.96314	0.280118	0.016265	3.19126	0.446339	578
2,6-Toluene_diisocyanate	6.6e-05	0.306886	0.974052	3e-06	0.0176114	0.999863	579
2,6-Xylenol	0.001839	1.83445	0.845536	0.000433	4.49696	0.882237	580
2,7-Dichlorodibenzo-p-dioxin	8e-06	0.207621	0.977995	0	0.0118961	0.999888	581
2,7-Dimethylbenzothiophene	8.6e-05	0.276827	0.976359	5e-06	0.0144462	0.999881	582
2,7-Dimethylnaphthalene	3.8e-05	0.208352	0.980647	2e-06	0.00940838	0.999907	583
2,7-Dimethyloctane	2e-06	0.0500926	0.992558	0	0.000784094	0.999975	584
2-Acetoacetoxy-ethyl_methacrylate	0.000604	1.51806	0.769849	0.000211	1.4439	0.945443	585
2-Acetyl-1-naphthol	0.000152	0.633171	0.934738	1.7e-05	0.46938	0.991755	586
2-(alpha-Methylbenzyloxy)-1-propanol.coskf	0.000471	1.59732	0.76709	0.000209	3.66135	0.700424	587
2-Amino-2-methyl-1-propanol.coskf	0.055526	2.27178	0.330934	miscible	#VALUE!	miscible	588
2-Amino-3,5-dichloropyridine	0.003398	2.60545	0.777072	0.000835	8.3708	0.874048	589
2-Amino-3-hydroxypyridine	miscible	#VALUE!	miscible	0.046162	5.35359	0.433368	590
2-Amino-4,6-dimethylpyridine	0.006463	3.03534	0.622647	0.002251	7.69265	0.64275	591
2-Amino-4-methyl-3-nitropyridine	0.009617	2.6573	0.617038	0.00367	3.8377	0.75349	592
2-Amino-4-methylpyridine	0.021675	3.16202	0.495216	0.00891	7.78522	0.563829	593
2-Amino-5-chloropyridine	0.017509	3.48575	0.592811	0.005951	10.8817	0.746691	594
2-Amino-5-nitropyridine	miscible	#VALUE!	miscible	0.023152	5.79415	0.491432	595
2-Aminoethoxyethanol.coskf	miscible	#VALUE!	miscible	miscible	#VALUE!	miscible	596
2-Aminopyridine	0.096666	1.86105	0.314913	0.029011	6.87776	0.498885	597
2-Bromobutane	0.00102	0.398296	0.977637	0.000131	0.0190458	0.999884	598
2-Bromopropane	0.003853	0.672393	0.969575	0.000589	0.0391938	0.999839	599
2-Butanol	0.01644	2.68478	0.638251	0.007491	2.98672	0.672366	600
2-Butanone.coskf	0.049957	2.85972	0.497744	miscible	#VALUE!	miscible	601
2-Buten-1-ol,_acetate	0.002373	1.80031	0.838212	0.001015	2.27452	0.940537	602
2-Butoxime	0.024571	2.70687	0.556476	0.010323	3.05527	0.691949	603
2-Butoxyethanol	0.003862	2.21683	0.647043	0.001914	2.59989	0.613316	604
2-Butyl-1-decanol	0	0.320848	0.921263	0	0.242531	0.95766	605
2-Butyl-2-ethyl-1,3-propanediol	0.000664	1.5445	0.69991	0.000266	2.1709	0.641073	606
2-Butylbenzothiophene	8e-06	0.169504	0.98114	0	0.00749489	0.999911	607
2-Butyl-nonan-1-ol	1e-06	0.431527	0.897256	0	0.438446	0.915751	608
2-Butyl-octan-1-ol	3e-06	0.454649	0.899429	0	0.391245	0.935304	609
2-Butyne-1,4-diol.coskf	miscible	#VALUE!	miscible	miscible	#VALUE!	miscible	610
2-Butyne	0.00813	1.07899	0.95699	0.00143	0.0735585	0.99977	611
2-Chloro-1,1,1,2-tetrafluoroethane	0.002369	0.93773	0.966404	0.000391	0.124345	0.999773	612
2-Chloro-1,1,1-trifluoroethane	0.005826	1.35348	0.954664	0.000981	0.165724	0.999737	613
2-Chloro-1,1-difluoroethylene	0.004069	0.574925	0.979741	0.000759	0.038418	0.999882	614
2-Chloro-1,3-propanediol.coskf	miscible	#VALUE!	miscible	miscible	#VALUE!	miscible	615
2-Chlorobiphenyl	3.6e-05	0.239999	0.977493	2e-06	0.0126958	0.999889	616
2-Chlorodibenzo-p-dioxin	2.2e-05	0.239186	0.976866	1e-06	0.0139103	0.999879	617
2-Chloroethanol	miscible	#VALUE!	miscible	0.085525	3.27223	0.451624	618
2-Chloropentane	0.000395	0.297424	0.980786	4.3e-05	0.0128198	0.999902	619
2-Chlorophenoxyacetic_acid	0.004643	3.137	0.588289	0.001058	7.74644	0.61597	620
2-Chloropropane	0.004581	0.69595	0.970033	0.000741	0.0403477	0.999841	621
2-Chloropropene	0.004723	0.634457	0.975074	0.000815	0.0359215	0.999872	622
2-Cyclohexene-1-one.coskf	0.049647	2.52539	0.366498	miscible	#VALUE!	miscible	623
2-Cyclohexenyl_cyclohexanone	0.000124	0.965635	0.858965	4.6e-05	2.45672	0.820993	624
2-Cyclohexyl_cyclohexanone	6e-05	0.676183	0.893871	1.9e-05	1.46122	0.884204	625
2-Difluoromethoxy-1,1,1-trifluoroethane.coskf	0.002486	1.43506	0.944633	0.000309	0.2034	0.999657	626
2-Ethoxyethanol	0.04299	2.32599	0.378078	0.042026	2.13765	0.27869	627
2-Ethoxyethyl_acetate	0.002491	2.10009	0.771105	0.002227	3.66883	0.832048	628
2-Ethyl-1-butanol	0.002663	1.74305	0.760215	0.000789	1.60399	0.801507	629
2-Ethyl-1-butene	0.000321	0.178635	0.987355	3.7e-05	0.0053113	0.999941	630
2-Ethyl-1-hexanol	0.000388	1.20666	0.795454	8.8e-05	1.17329	0.813701	631
2-Ethyl-1-hexene	3.5e-05	0.113908	0.988822	2e-06	0.00300189	0.999951	632
2-Ethyl-1-pentene	9.3e-05	0.139492	0.988283	8e-06	0.00387717	0.999947	633
2-Ethyl-2-hexenal	0.000585	1.40643	0.837649	0.000314	2.82828	0.841343	634
2-Ethylbenzothiophene	7.3e-05	0.264066	0.977394	4e-06	0.0135997	0.999887	635
2-Ethyl_butyric_acid	0.004574	2.20317	0.691743	0.001532	2.40922	0.726668	636
2-Ethylhexanal	0.000262	0.897974	0.899339	8.1e-05	1.17986	0.954354	637
2-Ethyl_hexanoic_acid	0.000487	1.36198	0.783027	0.00012	1.29462	0.812965	638
2-Ethylhexyl_acetate	2.5e-05	0.57973	0.915597	5e-06	0.714687	0.965035	639
2-Ethylhexyl_acrylate	1.2e-05	0.482042	0.925943	2e-06	0.534614	0.973998	640
2-Ethylhexyl_benzoate	1e-06	0.27433	0.951851	0	0.161917	0.993433	641
2-Ethyl-m-xylene	7.1e-05	0.190191	0.982683	5e-06	0.00748213	0.999918	642
2-Ethylnaphthalene	4.3e-05	0.211186	0.980595	2e-06	0.00960263	0.999906	643
2-Ethyloxirane	0.018791	2.86639	0.742257	0.015853	4.81895	0.751034	644
2-Ethyl-p-xylene	5.1e-05	0.173638	0.98377	3e-06	0.00644411	0.999925	645
2-Ethyl-tetrahydrothiophene	0.000358	0.349762	0.973916	3.7e-05	0.0183086	0.999848	646
2-Ethylthiophene	0.000617	0.386056	0.976588	6.7e-05	0.0201853	0.999879	647
2-Formyl_benzoic_acid	0.00957	2.73043	0.568637	0.004052	3.88958	0.63079	648
2-Heptanol	0.000574	1.36415	0.80125	0.000146	1.54888	0.80316	649
2-Heptanone	0.001123	1.77681	0.809333	0.000698	3.96319	0.766142	650
2-Hexanol	0.001553	1.6789	0.782383	0.000469	1.80705	0.801475	651
2-Hexanone	0.00383	2.37933	0.753235	0.003228	4.88109	0.66509	652
2-Hexoxyethanol	0.000383	1.4247	0.751068	0.000142	1.62103	0.745045	653
2-Hexyne	0.000606	0.415936	0.975518	6.8e-05	0.0208904	0.999868	654
2-Hydroxy-5-nitropyridine.coskf	miscible	#VALUE!	miscible	miscible	#VALUE!	miscible	655
2-Hydroxy-6-methylnicotinic_acid	0.009342	2.55218	0.559606	0.002746	2.95503	0.721644	656
2-Hydroxyacetophenone	0.001917	1.35945	0.885502	0.000463	1.09099	0.982455	657
2-Hydroxycaproic_acid	0.005541	2.61856	0.60015	0.001651	3.56393	0.665114	658
2-Hydroxyethyl_acrylate	0.048222	2.179	0.35365	0.029535	2.93443	0.472	659
2-Hydroxyethyl_methacrylate	0.014113	2.58675	0.512351	0.008779	3.02637	0.588354	660
2-Hydroxynicotinic_acid	miscible	#VALUE!	miscible	0.063286	1.95547	0.220262	661
2-Hydroxypropyl_acrylate	0.01267	2.78046	0.537283	0.014154	3.77477	0.48419	662
2-Hydroxypropyl_methacrylate	0.006864	2.48663	0.562341	0.005155	3.2939	0.586626	663
2-Hydroxypyridine	0.034756	3.03827	0.563055	0.010981	5.30763	0.755638	664
2-Mercaptobenzothiazole	0.000555	1.10411	0.909192	0.0001	2.81624	0.941809	665
2-Mercaptoethanol	miscible	#VALUE!	miscible	0.078302	2.95657	0.448404	666
2-Methacrylamide.coskf	miscible	#VALUE!	miscible	miscible	#VALUE!	miscible	667
2-Methoxy-2-methylpropane	0.003285	1.99279	0.806518	0.001947	4.23182	0.638923	668
2-Methoxy-5-nitropyridine	0.00267	1.6126	0.856976	0.000553	1.65425	0.971942	669
2-Methoxyethanol_acetate	0.017791	2.96672	0.568228	0.044214	3.53262	0.456238	670
2-Methoxyethanol.coskf	miscible	#VALUE!	miscible	miscible	#VALUE!	miscible	671
2-Methoxypropan-1-ol	0.031904	2.89396	0.451594	0.058532	1.83702	0.195518	672
2-Methoxypropane	0.0069	2.47963	0.780091	0.005645	4.53062	0.601903	673
2-Methyl-1,3-dioxolane.coskf	0.058664	2.61241	0.472414	miscible	#VALUE!	miscible	674
2-Methyl-1,3-pentanediol	0.015691	2.38953	0.446559	0.008163	2.65338	0.457524	675
2-Methyl-1,3-propanediol.coskf	miscible	#VALUE!	miscible	miscible	#VALUE!	miscible	676
2-Methyl-1-butanol	0.007947	2.41192	0.665164	0.004133	2.74775	0.641272	677
2-Methyl-1-butene-3-yne	0.004554	1.01693	0.958337	0.000647	0.0835713	0.999764	678
2-Methyl-1-butene	0.000975	0.266976	0.984991	0.00014	0.00924228	0.999927	679
2-Methyl-1-heptanol	0.000224	1.01776	0.836711	3.8e-05	0.871594	0.879958	680
2-Methyl-1-heptene	3e-05	0.120699	0.988278	2e-06	0.00332699	0.999949	681
2-Methyl-1-hexanol	0.000618	1.26516	0.817043	0.000133	1.10218	0.860873	682
2-Methyl-1-hexene	9.5e-05	0.151582	0.987428	8e-06	0.00448857	0.999943	683
2-Methyl-1-nonene	3e-06	0.0851973	0.989292	0	0.00212012	0.999956	684
2-Methyl-1-octene	9e-06	0.0996235	0.988875	0	0.00259524	0.999953	685
2-Methyl-1-pentanol	0.002181	1.76535	0.760736	0.000663	1.66148	0.799498	686
2-Methyl-1-pentene	0.000289	0.194752	0.986504	3.2e-05	0.00615867	0.999937	687
2-Methyl-1-propanol	0.018975	2.6791	0.618429	0.00814	2.78825	0.681969	688
2-Methyl-1-undecanol	3e-06	0.495241	0.88911	0	0.515773	0.905404	689
2-Methyl-2-aminobutane	0.005616	3.55852	0.592646	0.003011	8.07047	0.491765	690
2-Methyl-2-butanol	0.007858	2.38275	0.680838	0.003493	2.94612	0.671364	691
2-Methyl-2-butene	0.000884	0.246333	0.986164	0.000125	0.00808113	0.999934	692
2-Methyl-2-pentenal	0.006289	2.56549	0.728741	0.006177	4.69359	0.670573	693
2-Methyl-2-pentene	0.000264	0.174438	0.98783	2.9e-05	0.00509045	0.999944	694
2-Methyl-2-propanamine	0.014486	3.95356	0.519053	0.008864	8.22201	0.425519	695
2-Methyl-2-propanol	0.029598	2.72054	0.515498	0.016615	3.34867	0.49828	696
2-Methyl-3-ethylpentane	2.3e-05	0.0640612	0.992535	1e-06	0.00104043	0.999973	697
2-Methyl-,_3-hydroxy-2,2,4-trimethylpentyl_propanoate.coskf	4.8e-05	0.844386	0.834684	1.4e-05	1.17408	0.867344	698
2-Methyl-3-nitrobenzoic_acid	0.004771	2.63675	0.63104	0.001263	5.23802	0.650742	699
2-Methylbenzofuran	0.000303	0.386818	0.973541	2.7e-05	0.0238346	0.99985	700
2-Methyl_benzothiophene	0.000216	0.360621	0.973715	1.6e-05	0.0208607	0.999864	701
2-Methylbutane	0.000335	0.103439	0.992472	4.2e-05	0.0017685	0.99997	702
2-Methylbutanoic_acid	0.013112	2.7088	0.603447	0.00619	3.22039	0.656693	703
2-Methylbutyraldehyde	0.008232	2.30531	0.795795	0.005782	3.56647	0.872705	704
2-Methyldecane	0	0.0445157	0.992635	0	0.000677323	0.999976	705
2-Methyl-dodecan-1-ol	1e-06	0.404069	0.90399	0	0.326513	0.940204	706
2-Methyldodecane	0	0.0367432	0.992668	0	0.000539409	0.999977	707
2-Methylheptanal	0.000242	0.891382	0.900796	7.2e-05	1.15943	0.956067	708
2-Methylheptane	1.1e-05	0.0616403	0.992677	1e-06	0.000973928	0.999974	709
2-Methylhexanal	0.000764	1.20944	0.87903	0.000289	1.84082	0.931733	710
2-Methylhexane	3.5e-05	0.0711979	0.992641	2e-06	0.00114873	0.999973	711
2-Methylhexanoic_acid	0.001408	1.7815	0.734862	0.000433	1.79996	0.762303	712
2-Methylindene	0.000207	0.323294	0.975994	1.6e-05	0.0166007	0.999878	713
2-Methylnaphthalene	0.000115	0.273264	0.978273	8e-06	0.0137192	0.999892	714
2-Methylnonane	1e-06	0.0482814	0.992708	0	0.000733336	0.999976	715
2-Methyloctanal	8.6e-05	0.689498	0.914818	1.9e-05	0.835832	0.966427	716
2-Methyloctane	4e-06	0.0546117	0.992674	0	0.000849042	0.999975	717
2-Methyloctanoic_acid	0.000168	1.11296	0.803142	3.2e-05	1.02507	0.832637	718
2-Methyloxirane	0.098412	2.41403	0.526602	0.165759	1.78873	0.38427	719
2-Methylpentane	0.000108	0.0846383	0.992571	1e-05	0.0014089	0.999971	720
2-Methylphenol	0.008862	4.07815	0.645698	0.00381	17.9297	0.628086	721
2-Methylpropanal	0.025795	2.89872	0.707769	0.021069	4.78714	0.758925	722
2-Methylpropanenitrile	0.042619	2.83934	0.648107	0.022296	3.69798	0.897465	723
2-Methylpyrazine	0.039787	2.91181	0.400206	0.079942	1.62742	0.176095	724
2-Methyltetrahydrofuran	0.008613	2.92167	0.684924	0.00848	4.07377	0.454475	725
2-Methylthiacyclopentane	0.001042	0.4805	0.970069	0.000132	0.0272157	0.999822	726
2-Methyl_thiaindan	0.000218	0.370115	0.971072	1.6e-05	0.0213371	0.999846	727
2-Methylthiophene	0.001741	0.548437	0.972535	0.000242	0.0318718	0.999856	728
2-Methyltridecane	0	0.0347837	0.992582	0	0.000511711	0.999977	729
2-Methylundecane	0	0.0408756	0.992591	0	0.000618664	0.999976	730
2-Nitrobenzonitrile	0.007094	1.90251	0.804177	0.000849	0.778814	0.990004	731
2-Nitropropane	0.013343	1.9649	0.870047	0.003218	0.860825	0.992637	732
2-(N-Morpholino)-2'-hydroxydiethylether.coskf	0.016937	2.63967	0.272571	miscible	#VALUE!	miscible	733
2-Nonanol	7.2e-05	0.869753	0.84774	1.1e-05	0.983381	0.854931	734
2-Nonanone	0.000123	1.05833	0.860718	4.9e-05	2.4941	0.834148	735
2-Norbornene	0.000538	0.186905	0.987556	6.9e-05	0.00558941	0.999941	736
2-n-Propylthiophene	0.000197	0.282186	0.979663	1.7e-05	0.0134382	0.999896	737
2-Octanol	0.000181	1.00686	0.843839	3.3e-05	1.0499	0.866151	738
2-Octanone	0.000356	1.33315	0.842786	0.000175	3.03734	0.817121	739
2-Oxazolidone.coskf	miscible	#VALUE!	miscible	miscible	#VALUE!	miscible	740
2-Pentanethiol	0.00035	0.316265	0.978552	3.6e-05	0.015196	0.999883	741
2-Pentanol	0.006168	2.38473	0.68854	0.003092	3.01408	0.632745	742
2-Pentanone	0.012522	3.05183	0.666387	0.014024	4.88666	0.536231	743
2-Pentoxyethanol	0.000608	1.67373	0.769378	0.000346	2.87371	0.677363	744
2-Pentyne	0.001906	0.609073	0.970921	0.000278	0.0339508	0.999841	745
2-Phenyl-1-butene	9.5e-05	0.235421	0.980573	6e-06	0.0106972	0.999905	746
2-Phenyl-1-propanol	0.001674	1.88174	0.76512	0.000618	3.10341	0.764947	747
2-Phenyl-2-propanol	0.001558	1.73082	0.812199	0.000303	2.05822	0.908353	748
2-Phenylethanol	0.006763	2.52315	0.674629	0.001721	3.29176	0.79121	749
2-Phenylpropionaldehyde	0.001424	1.35549	0.874728	0.000328	1.32968	0.973688	750
2-Propanamine	0.033249	3.67414	0.449515	0.022839	6.42868	0.363602	751
2-Propanol	0.139633	1.42646	0.283656	0.061168	2.27758	0.342408	752
2-Propen-1-ol	miscible	#VALUE!	miscible	0.126044	1.71461	0.312905	753
2-Propenal.coskf	miscible	#VALUE!	miscible	miscible	#VALUE!	miscible	754
2-Propenenitrile	0.21609	1.50167	0.462571	0.035353	2.82704	0.955398	755
2-Propylbenzothiophene	2.3e-05	0.205155	0.979868	1e-06	0.00968521	0.999902	756
2-Propyn-1-ol.coskf	miscible	#VALUE!	miscible	miscible	#VALUE!	miscible	757
2-Pyrrolidone.coskf	miscible	#VALUE!	miscible	miscible	#VALUE!	miscible	758
[3-(2,3-Epoxyproxy)propyl]trimethoxysilane.coskf	0.000173	1.34286	0.769005	0.000234	3.14245	0.762009	759
3,3,3-Trifluoropropene	0.004647	0.779457	0.972014	0.000804	0.0577157	0.99985	760
3,3',4,4',5,5'-Hexachlorobiphenyl	0	0.103702	0.983655	0	0.00451346	0.999925	761
3,3',4,4',5-Pentachlorobiphenyl	1e-06	0.125689	0.982297	0	0.00593201	0.999917	762
3,3',4,4'-Tetrachlorobiphenyl	2e-06	0.15462	0.980665	0	0.0080052	0.999906	763
3,3',4,5,5'-Pentachlorobiphenyl	0	0.124045	0.982432	0	0.00592071	0.999917	764
3,3',4,5-Tetrachlorobiphenyl	2e-06	0.144746	0.981497	0	0.00706768	0.999912	765
3,3',4,5'-Tetrachlorobiphenyl	1e-06	0.152273	0.980867	0	0.0079407	0.999906	766
3,3',4-Trichlorobiphenyl	5e-06	0.181713	0.979522	0	0.00978221	0.999899	767
3,3',5,5'-Tetrachlorobiphenyl	1e-06	0.151724	0.980922	0	0.00803904	0.999906	768
3,3',5-Trichlorobiphenyl	4e-06	0.178059	0.979858	0	0.00962388	0.9999	769
3,3,5-Trimethylheptane	5e-06	0.053644	0.992337	0	0.000881459	0.999973	770
3,3'-Dichlorobiphenyl	1.2e-05	0.218092	0.977912	0	0.0122723	0.99989	771
3,3-Diethylpentane	1.7e-05	0.0595082	0.992388	1e-06	0.000981574	0.999972	772
3,3-Dimethyl-1-butene	0.000406	0.193854	0.986707	4.9e-05	0.00604344	0.999938	773
3,3-Dimethyl-1-butyne	0.001298	0.59162	0.96755	0.000157	0.0377497	0.999814	774
3,3-Dimethyl-2-butanone	0.006778	2.40956	0.735388	0.006497	4.49191	0.652211	775
3,3-Dimethylhexane	2.5e-05	0.0655214	0.992454	2e-06	0.00108043	0.999972	776
3,3-Dimethylpentane	7.6e-05	0.0782271	0.992258	6e-06	0.00135824	0.99997	777
3,4,4',5-Tetrachlorobiphenyl	2e-06	0.148652	0.981207	0	0.00739181	0.99991	778
3,4,4'-Trichlorobiphenyl	5e-06	0.187504	0.979071	0	0.0102872	0.999896	779
3,4,5-Trichlorobiphenyl	4e-06	0.159167	0.981283	0	0.00755663	0.999911	780
3,4',5-Trichlorobiphenyl	4e-06	0.181083	0.979627	0	0.00988658	0.999899	781
3,4,5-Trichloroguaiacol	0.000154	0.780865	0.916725	2.1e-05	2.31292	0.932935	782
3,4-Dichloro-1-butene	0.001154	0.608561	0.968495	0.000131	0.0422641	0.99983	783
3,4-Dichloroaniline	0.004153	4.43339	0.76432	0.002275	113.065	0.731454	784
3,4-Dichlorobiphenyl	1.2e-05	0.202694	0.978994	0	0.0106642	0.999896	785
3,4'-Dichlorobiphenyl	1.2e-05	0.224167	0.977468	0	0.01285	0.999887	786
3,4-Dichlorophenyl_isocyanate	9.9e-05	0.311407	0.976159	6e-06	0.0185932	0.999873	787
3,4-Dimethylhexane	2e-05	0.0630416	0.992632	1e-06	0.00101222	0.999973	788
3,4-Dimethylthiophene	0.000761	0.429015	0.974574	8.5e-05	0.023742	0.999867	789
3,4-Dinitrotoluene	0.000858	1.00554	0.913794	6.2e-05	0.19767	0.998356	790
3,4-Xylenol	0.003782	2.89175	0.7138	0.001072	8.448	0.722439	791
3,5-Dichlorobiphenyl	1e-05	0.198366	0.979435	0	0.0104312	0.999899	792
3,5-Dichloropyridine	0.00154	1.70833	0.863372	0.000479	5.03595	0.833923	793
3,5-Diisopropyl_toluene	3e-06	0.115124	0.98477	0	0.00395044	0.999933	794
3,5-Dimethylbenzofuran	0.000155	0.358616	0.97214	1.1e-05	0.0247785	0.999827	795
3,5-Dimethylbenzothiophene	8.2e-05	0.277328	0.976567	5e-06	0.0148314	0.999881	796
3,5-Dinitrosalicylic_acid	0.007537	3.21624	0.463493	0.001803	9.06394	0.459741	797
3,5-Dinitrotoluene	0.000948	1.08451	0.900876	9e-05	0.32319	0.996067	798
3,5-Xylenol	0.00314	2.90448	0.719596	0.000907	9.19939	0.719207	799
3,7-Dimethyl-1-octanol	4.9e-05	0.808729	0.84063	7e-06	0.804667	0.85976	800
3-Amino-1-propanol.coskf	miscible	#VALUE!	miscible	miscible	#VALUE!	miscible	801
3-Amino-2-chloropyridine	0.018659	3.37209	0.597636	0.006062	9.27184	0.772401	802
3-Aminopyridine.coskf	miscible	#VALUE!	miscible	miscible	#VALUE!	miscible	803
3-Chloro-1,2-propanediol	miscible	#VALUE!	miscible	0.0818	2.23874	0.326827	804
3-Chlorobiphenyl	3.2e-05	0.251058	0.976835	1e-06	0.0139609	0.999884	805
3-Chloro-o-xylene	0.000177	0.252901	0.981115	1.5e-05	0.0114046	0.999908	806
3-Chloropropene	0.006862	1.01928	0.960722	0.001118	0.0754562	0.999793	807
3-Chloropropyltrichlorosilane	5.5e-05	0.254654	0.978034	3e-06	0.0136355	0.999888	808
3-chloropropyltrimethoxysilane	0.00018	0.916174	0.886527	5.3e-05	1.39233	0.949161	809
3-Ethyl-1-heptanol	0.000131	0.942959	0.82529	2.2e-05	0.887742	0.849631	810
3-Ethyl-1-hexene	3.1e-05	0.0964491	0.990394	2e-06	0.00221555	0.99996	811
3-Ethyl-1-pentene	0.000117	0.141101	0.988288	1e-05	0.0039429	0.999947	812
3-Ethyl-2,5-dimethylthiophene	7.4e-05	0.20808	0.981874	5e-06	0.00858408	0.999912	813
3-Ethylbenzothiophene	8.6e-05	0.274289	0.976836	5e-06	0.0146981	0.999883	814
3-Ethyldodecane	0	0.0345211	0.992612	0	0.000505765	0.999977	815
3-Ethyl_heptanal	0.000153	0.845372	0.894754	4.3e-05	1.40772	0.933629	816
3-Ethylheptane	5e-06	0.0538694	0.992749	0	0.000826732	0.999975	817
3-Ethylhexane	1.5e-05	0.0599203	0.992788	1e-06	0.000928896	0.999974	818
3-Ethyl-o-xylene	6e-05	0.181016	0.983242	4e-06	0.00685338	0.999921	819
3-Ethylpentane	5.2e-05	0.0712853	0.992679	4e-06	0.00114107	0.999973	820
3-Heptanol	0.00048	1.2182	0.827263	0.00011	1.26491	0.84621	821
3-Heptanone	0.000886	1.59798	0.82802	0.000512	3.71331	0.774007	822
3-Hexanol	0.001442	1.61937	0.794589	0.000394	1.7919	0.818153	823
3-Hexanone	0.002911	2.10774	0.791237	0.001958	4.50932	0.732643	824
3-Hexyne	0.000509	0.370037	0.977828	5.7e-05	0.0173662	0.999882	825
3-Hydroxy-2-methyl_propionaldehyde.coskf	miscible	#VALUE!	miscible	miscible	#VALUE!	miscible	826
3-Hydroxy-4-methyloxybenzoic_acid	0.00818	2.92779	0.538725	0.003458	5.31369	0.574484	827
3-Hydroxybenzaldehyde	0.045241	2.37314	0.365081	0.016139	4.27406	0.511043	828
3-Hydroxybenzoic_acid.coskf	miscible	#VALUE!	miscible	miscible	#VALUE!	miscible	829
3-Hydroxybenzonitrile	0.03652	2.78357	0.390208	0.011958	6.58752	0.490958	830
3-Hydroxybutyrolactone.coskf	miscible	#VALUE!	miscible	miscible	#VALUE!	miscible	831
3-Hydroxypyridine	miscible	#VALUE!	miscible	0.027358	4.39933	0.624852	832
3-Mercaptopropionic_acid	miscible	#VALUE!	miscible	0.102841	1.59518	0.201189	833
[3-(Mercapto)propyl]triethoxysilane	5e-06	0.532526	0.910526	1e-06	1.47227	0.903599	834
3-Methoxy-1-butanol	0.017623	2.63858	0.472177	0.015708	2.83179	0.359554	835
3-Methoxyisopropylamine	0.017228	3.67556	0.445176	0.018619	4.53284	0.292056	836
3-Methoxypropionitrile	0.062999	2.42208	0.515508	0.03478	3.76235	0.827669	837
3-Methyl-1,2-butadiene	0.001467	0.391683	0.981188	0.00022	0.0171389	0.999905	838
3-Methyl-1,4-pentadiene	0.000691	0.325837	0.981005	8.4e-05	0.0141121	0.999904	839
3-Methyl-1-butanol	0.007946	2.38783	0.65337	0.003429	2.4884	0.670553	840
3-Methyl-1-butene	0.000959	0.252349	0.985692	0.000138	0.00841161	0.999931	841
3-Methyl-1-butyne	0.003175	0.806059	0.962616	0.000428	0.0550227	0.999788	842
3-Methyl-1-hexene	0.000106	0.145371	0.987929	9e-06	0.00413617	0.999946	843
3-Methyl-1H-indole	0.002604	3.05883	0.796461	0.000905	51.3219	0.750342	844
3-Methyl-1-pentanol	0.003297	1.987	0.714221	0.001117	2.15167	0.71926	845
3-Methyl-1-pentene	0.000311	0.184092	0.98713	3.5e-05	0.00557961	0.99994	846
3-Methyl-2-butanol	0.005825	2.08385	0.754534	0.001826	2.28864	0.794788	847
3-Methyl-2-butanone	0.013817	2.8934	0.678994	0.016131	4.55748	0.564607	848
3-Methyl-2-pentanone	0.004956	2.36855	0.74578	0.004624	4.60576	0.650692	849
3-Methyl-3-ethylpentane	3.1e-05	0.0643018	0.992561	2e-06	0.0010365	0.999973	850
3-Methyl-3-pentanol	0.002086	1.69522	0.779463	0.00066	1.9756	0.78854	851
3-Methylacryloxypropyltrichlorosilane.coskf	7e-06	0.366071	0.947606	0	0.23245	0.993195	852
3-Methylbutyraldehyde	0.009397	2.50115	0.771985	0.006821	4.24375	0.831519	853
3-Methyl-cis-2-pentene	0.000288	0.172526	0.987879	3.2e-05	0.00501203	0.999944	854
3-Methylcyclopentene	0.000556	0.191279	0.987923	7.2e-05	0.00556086	0.999943	855
3-Methyldecane	0	0.044291	0.992663	0	0.000671727	0.999976	856
3-Methyldodecane	0	0.0373065	0.992636	0	0.000551569	0.999977	857
3-Methylheptane	1.2e-05	0.0615078	0.992698	1e-06	0.00096967	0.999974	858
3-Methylhexanal	0.000993	1.34225	0.865576	0.000396	2.06835	0.92381	859
3-Methylhexane	3.7e-05	0.0705776	0.992686	3e-06	0.00113215	0.999973	860
3-Methylmercapto-propanal	0.014603	2.50456	0.747857	0.004814	2.98135	0.93816	861
3-Methylnonane	1e-06	0.0486537	0.9927	0	0.000745988	0.999975	862
3-Methyloctane	4e-06	0.0542563	0.992707	0	0.000839992	0.999975	863
3-Methylpentane	0.000116	0.0837576	0.992617	1.1e-05	0.00138624	0.999971	864
3-Methyl_sulfolane	0.065867	2.08042	0.44274	0.058467	2.44409	0.852851	865
3-Methylthiophene	0.001719	0.56502	0.972268	0.000238	0.0342166	0.999853	866
3-Methyl-trans-2-pentene	0.000268	0.169375	0.988102	2.9e-05	0.00486682	0.999945	867
3-Methyltridecane	0	0.0344943	0.992612	0	0.000505404	0.999977	868
3-Methylundecane	0	0.0399765	0.992696	0	0.000591171	0.999977	869
3-Nitrobenzonitrile	0.005701	1.83737	0.817095	0.00066	0.716073	0.990821	870
3-Nitrobenzotrifluoride	0.000392	0.710821	0.945068	3.5e-05	0.166744	0.998704	871
3-Nitrophenol	0.02143	3.55803	0.450739	0.00798	10.3304	0.48644	872
3-(N,N-Dimethylamino)_propylamine	0.007903	3.73145	0.408239	0.007289	5.63649	0.275819	873
3-Nonanone	9.8e-05	0.960517	0.872523	3.6e-05	2.33223	0.842672	874
3-Octanone	0.000346	1.3814	0.830306	0.000196	3.37618	0.757988	875
3-Pentanol	0.004921	2.0955	0.747193	0.001822	2.53076	0.734498	876
3-Pentanone	0.008655	2.76537	0.727336	0.008282	5.07527	0.635782	877
3-Phenyl-1-propanol	0.002237	2.12838	0.715636	0.000608	2.81796	0.783026	878
3-(Triethoxysilyl)propionitrile	0.000264	1.46305	0.760239	0.000182	3.06131	0.802968	879
3-(Trimethoxysilyl)-1-propanethiol	0.000128	0.839524	0.893875	2.9e-05	1.35942	0.950417	880
4-[2-(2-Aminoethoxy)ethyl]morpholine.coskf	0.009899	2.94685	0.286441	miscible	#VALUE!	miscible	881
4-(2-Aminoethyl)morpholine.coskf	0.016474	3.1227	0.324587	miscible	#VALUE!	miscible	882
4-((2-Hydroxyethoxy)carbonyl)_benzoic_acid.coskf	0.005283	2.26479	0.496654	0.001765	2.65632	0.588634	883
4-(2-Hydroxyethyl)morpholine.coskf	0.024843	2.75023	0.331523	miscible	#VALUE!	miscible	884
4-(2-Methoxyethyl)morpholine	0.006866	3.13535	0.488872	0.019007	2.52	0.167172	885
4,4'-Dichlorobiphenyl	1.3e-05	0.229182	0.977094	0	0.0133228	0.999885	886
4,4'-Diisopropylbiphenyl	0	0.118627	0.981355	0	0.0049214	0.999916	887
4,4'-Dinitrodiphenylamine	0.000554	1.76727	0.695375	6e-05	2.07218	0.812098	888
4,4'-Dinitrotriphenylamine	8e-06	0.59026	0.894687	0	0.391028	0.988514	889
4,5,6-Trichloroguaiacol	0.000169	0.978108	0.902189	2.5e-05	4.93854	0.898811	890
4,5-Dichloroguaiacol	0.000368	1.13915	0.901132	6.1e-05	4.17119	0.9209	891
4,6-Dichloroguaiacol	0.000551	1.27061	0.87287	8.8e-05	1.64105	0.935176	892
4,6-Dimethyldibenzothiophene	1.2e-05	0.202303	0.97758	0	0.0104172	0.99989	893
4,6-Dinitro-o-sec-butylphenol	5.1e-05	0.530205	0.935559	3e-06	0.197534	0.994839	894
4-Aminoacetophenone	0.024886	2.55323	0.414668	0.009417	4.19868	0.562017	895
4-Aminobenzoic_acid	miscible	#VALUE!	miscible	0.039414	4.56219	0.307898	896
4-Aminosalicylic_acid	0.078439	1.73057	0.203439	0.043142	4.99387	0.225116	897
4-Bromobenzoic_acid	0.003654	2.7732	0.672717	0.001099	5.83948	0.671319	898
4-Carboxybenzaldehyde	0.016022	2.73012	0.484098	0.006798	4.12539	0.547937	899
4-Chloro-3-nitrobenzotrifluoride	0.000168	0.553586	0.953925	1.1e-05	0.0916128	0.999313	900
4-Chlorobenzoic_acid	0.004554	2.90488	0.661303	0.001416	6.29777	0.65823	901
4-Chlorobenzyl_alcohol	0.003968	2.55896	0.75144	0.000844	4.24902	0.862767	902
4-Chlorobiphenyl	3.5e-05	0.260075	0.97621	2e-06	0.0147465	0.999881	903
4-Chloroguaiacol	0.001027	1.41629	0.888754	0.000181	3.01982	0.937891	904
4-Chloro-o-xylene	0.000177	0.274953	0.980008	1.4e-05	0.01328	0.9999	905
4-Cyclohexene-1,2-dicarboxylic-anhydride.coskf	0.006467	1.76939	0.813964	0.000648	0.571704	0.992563	906
4-Ethyl-m-xylene	4.9e-05	0.172639	0.98378	3e-06	0.00640641	0.999925	907
4-Ethyl-o-xylene	4.5e-05	0.168551	0.984066	3e-06	0.00614001	0.999926	908
4-Fluorobenzoic_acid	0.008748	3.29833	0.607346	0.003607	7.08344	0.62187	909
4-Formylmorpholine.coskf	miscible	#VALUE!	miscible	miscible	#VALUE!	miscible	910
4-Heptanone	0.000969	1.64151	0.823347	0.000589	3.79624	0.766233	911
4-Hexylresorcinol	0.000167	1.89828	0.721319	3.7e-05	6.0669	0.672351	912
4-Hydroxyacetophenone	0.019589	2.57006	0.445808	0.007872	3.19824	0.58539	913
4-Hydroxybenzaldehyde	0.056899	2.02879	0.311913	0.018973	3.5676	0.48285	914
4-Hydroxybenzoic_acid.coskf	miscible	#VALUE!	miscible	miscible	#VALUE!	miscible	915
4-Hydroxybenzonitrile	0.051496	2.29992	0.321444	0.015998	5.46132	0.456451	916
4-Hydroxybenzyl_alcohol	0.08535	1.64034	0.226469	0.02422	5.97291	0.389514	917
4-Hydroxybutyraldehyde.coskf	miscible	#VALUE!	miscible	miscible	#VALUE!	miscible	918
4-Hydroxymethyl_benzoic_acid	0.026893	2.44224	0.343077	0.011045	3.93539	0.430978	919
4-Hydroxystyrene	0.007418	4.14888	0.625025	0.00267	20.2059	0.599447	920
4-Iodobenzoic_acid	0.001984	2.49842	0.700885	0.000636	5.05837	0.696117	921
4-Iodophenol	0.005891	4.43088	0.636311	0.00219	26.4662	0.584929	922
4-Isobutylstyrene	1.4e-05	0.166861	0.982161	1e-06	0.00697047	0.999916	923
4-Methoxyphenylacetic_acid	0.004482	2.48212	0.624914	0.001185	3.61409	0.683193	924
4-Methyl-1-heptene	3.4e-05	0.110667	0.989287	2e-06	0.00284199	0.999954	925
4-Methyl-1-hexene	0.000111	0.149029	0.987742	9e-06	0.00432784	0.999945	926
4-Methyl-1H-imidazole.coskf	miscible	#VALUE!	miscible	miscible	#VALUE!	miscible	927
4-Methyl-1-octanol	0.000107	0.929884	0.82767	1.7e-05	0.865733	0.852906	928
4-Methyl-1-pentene	0.000309	0.191816	0.986771	3.5e-05	0.00599254	0.999938	929
4-Methyl-2-pentanol	0.003594	2.04652	0.703047	0.001333	2.48971	0.671687	930
4-Methyl-cis-2-pentene	0.000281	0.180126	0.9874	3.1e-05	0.00540503	0.999941	931
4-Methyl-cyclohexane-methanol	0.000976	1.3021	0.799448	0.000222	1.153	0.845893	932
4-Methylcyclopentene	0.000558	0.194327	0.987711	7.3e-05	0.00571764	0.999942	933
4-Methyl_dibenzothiophene	3.2e-05	0.255641	0.97512	1e-06	0.0146301	0.999874	934
4-Methylheptane	1.3e-05	0.061545	0.992695	1e-06	0.000970644	0.999974	935
4-Methylmorpholine	0.013575	3.3506	0.530105	0.019521	3.28581	0.270498	936
4-Methylnonane	1e-06	0.0484075	0.992711	0	0.000740691	0.999975	937
4-Methyloctane	4e-06	0.0541097	0.992715	0	0.000836629	0.999975	938
4-Methylphenanthrene	3.4e-05	0.268092	0.973514	1e-06	0.0157034	0.999865	939
4-Methylphenol	0.00885	3.76308	0.649518	0.003514	12.7199	0.6594	940
4-Methyl-trans-2-pentene	0.000245	0.16209	0.988493	2.6e-05	0.00448504	0.999947	941
4-Nitrobenzonitrile	0.005273	1.79606	0.825852	0.000575	0.662856	0.991775	942
4-Nitrophenol	0.029439	3.10842	0.39709	0.009269	8.56998	0.478557	943
4-Nonanone	0.000144	1.15524	0.840364	7.1e-05	3.0436	0.742776	944
4-Octanone	0.000399	1.43757	0.820289	0.000249	3.53113	0.718783	945
4-tert-Butylphenol	0.000792	1.98659	0.776898	0.000178	6.11125	0.776058	946
4-[(Tetrahydro-2-furanyl)oxy]-1-butanol.coskf	0.003165	2.27284	0.559035	0.003781	3.01465	0.386973	947
5-Chloro-3-pyridinol	0.027384	3.05668	0.4615	0.007182	7.02094	0.663611	948
5-Chloroguaiacol	0.00093	1.36287	0.893855	0.000166	3.51413	0.934312	949
5-Chlorovanillin	0.003232	2.0534	0.706208	0.000935	2.1065	0.837461	950
5-Ethylidine-2-norbornene	0.000141	0.195516	0.984018	1.2e-05	0.00716183	0.999924	951
5-Ethyl-m-xylene	3.4e-05	0.155552	0.984926	2e-06	0.00536314	0.999932	952
5-Hexen-2-one	0.007583	2.61625	0.739414	0.005293	5.19181	0.765565	953
5-Methyl-1-hexanol	0.000846	1.50306	0.771359	0.000233	1.59277	0.779385	954
5-Methyl-1-hexene	0.000104	0.152635	0.987471	9e-06	0.00451577	0.999943	955
5-Methyl-2-hexanone	0.001564	1.90988	0.791095	0.00112	4.18938	0.733279	956
5-Methylindan	8.6e-05	0.200964	0.982653	6e-06	0.00787548	0.999916	957
5-Methylnonane	1e-06	0.0487365	0.992699	0	0.000747365	0.999975	958
5-Nonanone	0.0001	0.933484	0.877402	3.6e-05	2.18946	0.857086	959
5-o-Tolyl-2-pentene	1.4e-05	0.188129	0.980058	1e-06	0.00834793	0.999903	960
6-Aminohexanamide.coskf	miscible	#VALUE!	miscible	miscible	#VALUE!	miscible	961
6-Aminohexanol	0.009994	2.99567	0.364093	0.009148	3.866	0.254761	962
6-Chloronicotinic_acid	0.010087	2.96046	0.557267	0.003837	4.55621	0.641512	963
6-Hydroxyhexanoic_acid	0.03185	2.09617	0.305043	0.015718	2.57482	0.427528	964
6-Methyl-1-heptene	3.2e-05	0.120683	0.98835	2e-06	0.00332111	0.999949	965
6-Methyl-1-octanol	0.000105	0.91956	0.830768	1.6e-05	0.840667	0.859385	966
7-Methyl-1-octene	1e-05	0.100344	0.988898	0	0.00261573	0.999953	967
8-Hydroxyquinoline	0.000907	0.898701	0.930615	0.000136	0.450686	0.992661	968
8-Methyl-1-nonanol	3.1e-05	0.741937	0.855144	4e-06	0.71675	0.878564	969
8-Methyl-1-nonene	3e-06	0.0842809	0.989428	0	0.00207327	0.999957	970
8-Methylquinoline	0.000725	1.79847	0.827045	0.000203	6.81	0.74037	971
Abietic_acid	2e-06	0.448905	0.87305	0	0.425388	0.904852	972
Acenaphthalene	0.000158	0.321458	0.975388	1.1e-05	0.0182346	0.999876	973
Acenaphthene	9.3e-05	0.242743	0.97938	6e-06	0.011363	0.999899	974
Acetal	0.000868	1.50648	0.832175	0.0007	3.61494	0.697019	975
Acetaldehyde.coskf	miscible	#VALUE!	miscible	miscible	#VALUE!	miscible	976
Acetaldol.coskf	miscible	#VALUE!	miscible	miscible	#VALUE!	miscible	977
Acetaldoxime.coskf	miscible	#VALUE!	miscible	miscible	#VALUE!	miscible	978
Acetamide.coskf	miscible	#VALUE!	miscible	miscible	#VALUE!	miscible	979
Acetaminophen	0.030903	2.3112	0.316777	0.00947	4.01499	0.488013	980
Acetanilide	0.007064	2.59471	0.631875	0.001937	3.21959	0.766806	981
Acetic_acid.coskf	miscible	#VALUE!	miscible	miscible	#VALUE!	miscible	982
Acetic_anhydride	0.05422	2.56781	0.507079	0.030825	5.2007	0.682722	983
Acetoacetanilide	0.001472	2.02917	0.740968	0.000652	4.325	0.804287	984
Acetoacetic_acid.coskf	miscible	#VALUE!	miscible	miscible	#VALUE!	miscible	985
Acetoin.coskf	miscible	#VALUE!	miscible	miscible	#VALUE!	miscible	986
Acetol.coskf	miscible	#VALUE!	miscible	miscible	#VALUE!	miscible	987
Acetomethoxane	0.001133	1.54536	0.809993	0.000656	1.91042	0.929969	988
Acetone.coskf	miscible	#VALUE!	miscible	miscible	#VALUE!	miscible	989
Acetone_cyanohydrin	miscible	#VALUE!	miscible	0.079521	2.39889	0.382164	990
Acetonitrile.coskf	miscible	#VALUE!	miscible	miscible	#VALUE!	miscible	991
Acetovanillone	0.002844	2.10783	0.70152	0.000988	2.70657	0.803582	992
Acetoxyacetic_acid	miscible	#VALUE!	miscible	0.059747	2.61689	0.30468	993
Acetylacetone	0.100384	1.8092	0.364887	0.178793	1.80886	0.443529	994
Acetyl_chloride	0.020535	1.90849	0.919227	0.003791	0.240715	0.999394	995
Acetylene	miscible	#VALUE!	miscible	0.048074	1.33607	0.998404	996
Acetylsalicylic_acid	0.003249	2.36774	0.661369	0.000858	3.90162	0.696011	997
Acridine	0.00022	1.47396	0.836506	4.9e-05	6.12587	0.752192	998
Acrolein_cyanohydrin	miscible	#VALUE!	miscible	0.093353	2.32573	0.288373	999
Acrylamide.coskf	miscible	#VALUE!	miscible	miscible	#VALUE!	miscible	1000
Acrylic_acid.coskf	miscible	#VALUE!	miscible	miscible	#VALUE!	miscible	1001
Acryloxy_propionic_acid	0.019768	2.62774	0.437788	0.008711	3.5215	0.549586	1002
Acyclovir.coskf	miscible	#VALUE!	miscible	miscible	#VALUE!	miscible	1003
Adamantane	4.1e-05	0.0559406	0.993236	3e-06	0.000786327	0.999976	1004
Adipic_acid.coskf	miscible	#VALUE!	miscible	miscible	#VALUE!	miscible	1005
Adiponitrile	0.085464	1.72743	0.362224	0.023825	2.93004	0.840427	1006
Agathadiol	8e-06	0.752626	0.766494	1e-06	1.02025	0.756197	1007
Allyl_acetate	0.008671	2.47134	0.778017	0.00454	3.13658	0.92329	1008
Allyl_acrylate	0.002951	1.77464	0.851042	0.000953	1.89938	0.961579	1009
Allylamine	0.079856	2.54314	0.360808	0.045094	5.45193	0.34464	1010
Allyl_ether	0.002163	1.86567	0.849072	0.000902	4.4074	0.846313	1011
Allyl_glycidyl_ether	0.006254	2.40235	0.755498	0.004126	4.1941	0.842667	1012
Allylidene_diacetate	0.001872	1.62774	0.82389	0.00042	1.10177	0.978121	1013
Allyl_methacrylate	0.000882	1.1614	0.89729	0.000211	0.815727	0.984728	1014
Allyl-tert-butylperoxide	0.00047	1.01483	0.898108	0.000144	1.52424	0.949661	1015
alpha-Epichlorohydrin	0.023568	2.53912	0.810434	0.005973	1.98129	0.981412	1016
alpha-Hydroxyisobutyramide.coskf	miscible	#VALUE!	miscible	miscible	#VALUE!	miscible	1017
alpha-Hydroxyisobutyric_acid	0.116444	1.33814	0.212734	0.030991	3.38773	0.45323	1018
alpha-Methylbenzyl_alcohol	0.004061	2.17956	0.735529	0.00105	2.72518	0.813531	1019
alpha-Methylbenzyl_alcohol_formate	0.000933	1.14562	0.894064	0.000136	0.65306	0.99069	1020
alpha-Methylstyrene	0.00028	0.330427	0.977001	2.5e-05	0.017007	0.999884	1021
alpha-Phellandrene	2.8e-05	0.128582	0.986625	2e-06	0.00396409	0.999941	1022
alpha-Pinene	2.6e-05	0.0805197	0.990956	1e-06	0.00169159	0.999964	1023
alpha-Terpinene	2.5e-05	0.125329	0.986767	1e-06	0.00377886	0.999942	1024
alpha-Terpineol	0.000295	1.13473	0.821371	6e-05	1.48347	0.838743	1025
alpha-Tocopherol	0	0.101475	0.959758	0	0.0599697	0.98733	1026
Aminoacetonitrile.coskf	miscible	#VALUE!	miscible	miscible	#VALUE!	miscible	1027
Aminocapronitrile	0.022909	3.10912	0.336693	0.026344	4.13571	0.259309	1028
Aminopyrine	7.8e-05	1.23465	0.787044	5e-05	3.77242	0.623159	1029
Ammonia.coskf	miscible	#VALUE!	miscible	miscible	#VALUE!	miscible	1030
Amobarbital	0.001844	1.91139	0.554349	0.000986	2.29761	0.565016	1031
Androstanolone	6.4e-05	1.05476	0.708365	3.5e-05	1.94833	0.600735	1032
Anethole	0.000128	0.452652	0.961386	9e-06	0.0873965	0.999225	1033
Aniline	0.022672	3.52276	0.676901	0.006693	13.3104	0.859029	1034
Anthracene	4.6e-05	0.271981	0.975282	2e-06	0.0155744	0.999876	1035
Anthraquinone	0.000288	0.892202	0.888646	5.4e-05	0.472825	0.988886	1036
Antipyrine	0.00146	2.53876	0.615949	0.001504	5.30056	0.404139	1037
Ascorbic_acid.coskf	miscible	#VALUE!	miscible	miscible	#VALUE!	miscible	1038
Atrazine	9.9e-05	1.11049	0.820507	1.5e-05	1.39713	0.8779	1039
Azelaic_acid	0.002031	2.27522	0.522902	0.000985	2.85935	0.525136	1040
Aziridine.coskf	miscible	#VALUE!	miscible	miscible	#VALUE!	miscible	1041
Barbital	0.038713	1.83284	0.265949	0.032844	2.17255	0.271968	1042
Benzaldehyde	0.009174	2.3988	0.781648	0.004605	3.40599	0.911552	1043
Benzamide	0.069583	1.74195	0.257317	0.021988	3.45461	0.42335	1044
Benzanthracene	1e-05	0.263387	0.971096	0	0.0173444	0.999849	1045
Benzene-1,2,4-tricarboxylic_acid_trimethyl_ester.coskf	0.000254	1.11154	0.828228	5.3e-05	0.757204	0.975998	1046
Benzene	0.003273	0.594351	0.973445	0.0005	0.0339334	0.999864	1047
Benzenesulfonic_acid	0.015982	3.86956	0.43634	0.006721	13.8794	0.405765	1048
Benzidine	0.002963	3.50716	0.693753	0.001066	34.997	0.816367	1049
Benzoic_acid	0.012195	3.1537	0.593462	0.005281	5.69084	0.624266	1050
Benzonitrile	0.0077	2.095	0.830139	0.001786	1.45026	0.980745	1051
Benzothiophene	0.000595	0.479611	0.971031	5.8e-05	0.0316103	0.999846	1052
Benzotrichloride	7.5e-05	0.213195	0.982026	5e-06	0.00975632	0.999914	1053
Benzotrifluoride	0.000363	0.34275	0.979087	3.7e-05	0.0188744	0.999893	1054
Benzoyl_chloride	0.000624	0.535328	0.965033	6.4e-05	0.0518159	0.999713	1055
Benzoyl_peroxide	2.3e-05	0.506074	0.933074	1e-06	0.155959	0.99708	1056
Benzyl_acetate	0.000846	1.3204	0.869873	0.000199	1.41278	0.968116	1057
Benzyl_alcohol	0.010319	2.74226	0.662567	0.003693	3.37756	0.778877	1058
Benzyl_benzoate	3.7e-05	0.55779	0.931476	3e-06	0.306111	0.993698	1059
Benzyl_chloride	0.000737	0.539733	0.968453	7.2e-05	0.0358239	0.999831	1060
Benzyl_dichloride	0.000337	0.501732	0.967845	2.8e-05	0.0377924	0.999822	1061
Benzyl_ethyl_ether	0.00018	0.547657	0.951794	2.6e-05	0.661752	0.987155	1062
Benzyl_formate	0.004427	1.88665	0.818718	0.000705	1.26954	0.981042	1063
Benzyl_mercaptan	0.000877	0.666914	0.957942	7.6e-05	0.0487737	0.999761	1064
beta-Carotene	0	0.0473389	0.981436	0	0.00170359	0.999928	1065
beta-Cholesterol	0	0.211333	0.916986	0	0.22499	0.939556	1066
Betamethasone_acetate	9.1e-05	1.17106	0.593593	2.7e-05	1.54021	0.676837	1067
Betamethasone	0.001057	1.58765	0.405895	0.000509	2.16375	0.417779	1068
beta-Phellandrene	3.6e-05	0.144114	0.985424	2e-06	0.00479994	0.999934	1069
beta-Pinene	4.5e-05	0.113385	0.988177	3e-06	0.00312073	0.999948	1070
beta-Propiolactone	miscible	#VALUE!	miscible	0.061501	2.14811	0.947495	1071
beta-Terpineol	0.000261	1.05857	0.837096	4.6e-05	1.31751	0.868816	1072
Bicyclo[2.2.1]heptane	0.000221	0.0903339	0.992484	2.4e-05	0.00152823	0.99997	1073
Bicyclo[2.2.2]octane	8.6e-05	0.0678299	0.993105	7e-06	0.00100327	0.999974	1074
Bicyclohexyl	2e-06	0.039943	0.993311	0	0.000535321	0.999978	1075
Biphenyl	9.3e-05	0.306881	0.974589	5e-06	0.0172793	0.999871	1076
Bis-(2-aminoethyl)ether.coskf	miscible	#VALUE!	miscible	miscible	#VALUE!	miscible	1077
Bis-2-chloroethyl-2-chloroethyl_phosphonate.coskf	0.001213	2.0688	0.661616	0.000387	5.01755	0.687985	1078
Bis-2-chloroethyl_sulfide	0.000595	0.757628	0.949466	3.8e-05	0.0608202	0.999708	1079
Bis-2-hydroxyethyl-terephthalate	0.001688	2.00067	0.503383	0.000854	2.17612	0.596011	1080
Bis[3-(triethoxysilyl)propyl]disulfide.coskf	0	0.336258	0.885273	0	0.913291	0.87788	1081
Bis[3-(trimethoxysilyl)propyl]disulfide.coskf	0	0.421315	0.892402	0	0.6704	0.949391	1082
Bis(alpha-methylbenzyl)_ether	5e-06	0.28868	0.960762	0	0.450549	0.989837	1083
Bis-chloromethyl_ether	0.007147	1.5993	0.93157	0.00093	0.194762	0.999569	1084
Bis-cyanoethyl_ether	0.029003	2.21117	0.525919	0.007196	2.00274	0.920118	1085
Bis-difluoromethyl_ether	0.016648	3.33454	0.893652	0.003034	0.893513	0.999149	1086
Bisphenol_A	0.000593	2.64778	0.605582	0.000167	10.2288	0.552394	1087
Bis(trifluoromethyl)sulfide	0.000183	0.0824875	0.993033	1.9e-05	0.00129062	0.999973	1088
Boric_acid.coskf	miscible	#VALUE!	miscible	miscible	#VALUE!	miscible	1089
Boron_tribromide	0.00076	0.230385	0.987351	0.000106	0.0081075	0.99994	1090
Boron_trichloride	0.001729	0.317775	0.986348	0.0003	0.0149524	0.99993	1091
Boron_trifluoride	0.07253	4.33677	0.874626	0.018183	2.76853	0.998774	1092
Bromine	0.011187	0.708761	0.979206	0.002855	0.0454686	0.999887	1093
Bromobenzene	0.000882	0.441928	0.976153	0.000106	0.0254022	0.999878	1094
Bromochlorodifluoromethane	0.001183	0.19105	0.990283	0.000191	0.00531534	0.999953	1095
Bromochloromethane	0.014792	1.74975	0.94193	0.002842	0.20297	0.999693	1096
Bromodifluoromethane	0.015022	2.09173	0.943067	0.003473	0.348231	0.999659	1097
Bromoethane	0.009173	0.977073	0.963454	0.001761	0.0640099	0.999811	1098
Bromotrichloromethane	0.000482	0.188618	0.988206	6.2e-05	0.00604198	0.999945	1099
Bromotrifluoroethylene	0.00106	0.197559	0.989962	0.000166	0.00567073	0.999951	1100
Bromotrifluoromethane	0.001968	0.195548	0.991031	0.00037	0.00496796	0.999957	1101
Butabarbital	0.005784	2.07194	0.493861	0.003386	2.51696	0.507151	1102
Butanal	0.027815	3.02911	0.675179	0.025129	4.92924	0.699238	1103
Butane	0.000792	0.1229	0.992628	0.000119	0.00208471	0.999969	1104
Butanenitrile	0.040675	2.88243	0.645184	0.019546	3.77564	0.898611	1105
Butanoic_acid	0.044596	2.61569	0.444923	0.02065	3.88471	0.537744	1106
Butyl_4-hydroxybenzoate	0.00025	1.47661	0.737455	4.9e-05	1.53205	0.772309	1107
Butyl_p-aminobenzoate	0.000274	1.47491	0.778174	4.7e-05	1.63968	0.883182	1108
Butyl_vinyl_ether	0.000535	0.626444	0.955509	7.9e-05	0.208386	0.997847	1109
Butyric_anhydride	0.000313	1.02237	0.888812	6.4e-05	0.717401	0.983849	1110
Caffeine.coskf	0.028923	2.28816	0.30499	miscible	#VALUE!	miscible	1111
Camphene	5.4e-05	0.115234	0.988107	4e-06	0.00319519	0.999948	1112
Camphor	0.001003	1.43103	0.812944	0.000664	3.00928	0.779376	1113
Caprinitrile	3.9e-05	0.646148	0.918406	5e-06	0.484308	0.985434	1114
Carbamyl_chloride.coskf	miscible	#VALUE!	miscible	miscible	#VALUE!	miscible	1115
Carbon_dioxide	0.07289	1.44987	0.956754	0.019668	0.133094	0.999808	1116
Carbon_disulfide	0.002499	0.145137	0.992851	0.000486	0.00244946	0.999969	1117
Carbon_monoxide	0.050131	0.460884	0.988113	0.016866	0.0153032	0.999938	1118
Carbon_tetrafluoride	0.00413	0.146693	0.99353	0.000869	0.00217563	0.999972	1119
Carbonyl_fluoride	0.028171	1.16013	0.968062	0.007515	0.0870817	0.999833	1120
Carbonyl_sulfide	0.010499	0.367647	0.987958	0.002823	0.0113769	0.99994	1121
Cellobiose	0.004255	1.98689	0.432002	0.002007	2.29432	0.471565	1122
Cetyl_methacrylate	0	0.113921	0.967832	0	0.050746	0.996321	1123
Chlorine	0.015427	0.490956	0.985802	0.004379	0.0206295	0.999927	1124
Chloroacetaldehyde	0.072063	2.67111	0.709541	0.013056	2.01772	0.985536	1125
Chloroacetic_acid.coskf	miscible	#VALUE!	miscible	miscible	#VALUE!	miscible	1126
Chloroacetyl_chloride	0.00992	2.15499	0.91443	0.001426	0.325454	0.999368	1127
Chlorobenzene	0.001101	0.461604	0.97623	0.000141	0.0265703	0.999878	1128
Chlorocyclohexane	0.000374	0.270986	0.981059	4.1e-05	0.0111932	0.999904	1129
Chlorodifluoromethane	0.019932	2.39603	0.938405	0.005039	0.434189	0.999637	1130
Chloroethane	0.013116	1.08749	0.96094	0.002731	0.0740231	0.9998	1131
Chlorofluoromethane	0.052018	2.62509	0.902287	0.010145	0.437894	0.999518	1132
Chloroform	0.004207	0.976104	0.965669	0.000713	0.104662	0.999788	1133
Chloromethane	0.056125	1.83744	0.931347	0.012446	0.182674	0.999699	1134
Chloro_methyl_methyl_ether	0.030059	2.71595	0.80752	0.009408	2.75894	0.970592	1135
Chloropentafluoroethane	0.000353	0.0922469	0.993102	4.5e-05	0.00149147	0.999972	1136
Chloroprene	0.00262	0.638537	0.972879	0.00039	0.0415578	0.999857	1137
Chloropyrifos	0	0.152717	0.975264	0	0.0105464	0.999836	1138
Chlorosulfonic_acid.coskf	miscible	#VALUE!	miscible	miscible	#VALUE!	miscible	1139
Chlorotrifluoroethylene	0.001242	0.170877	0.991194	0.000206	0.00389389	0.99996	1140
Chlorotrifluoromethane	0.00239	0.16172	0.992365	0.000459	0.00309029	0.999966	1141
Cholesterol_acetate	0	0.10838	0.962182	0	0.0807819	0.992727	1142
Cholesteryl_benzoate	0	0.0753345	0.971045	0	0.0293707	0.997666	1143
Chrysene	8e-06	0.222037	0.974781	0	0.0132639	0.999873	1144
Cimetidine	0.003418	2.16947	0.397089	0.000505	3.16084	0.588898	1145
Cinnamic_acid	0.004772	2.47367	0.649142	0.001259	2.989	0.741698	1146
cis-1,2-Dichloroethene	0.006606	1.0705	0.963612	0.001198	0.0998164	0.999798	1147
cis-1,2-Dimethylcyclohexane	4.6e-05	0.0642614	0.992924	3e-06	0.000974772	0.999974	1148
cis-1,2-Dimethylcyclopentane	0.000107	0.07662	0.992751	1e-05	0.00122154	0.999972	1149
cis-1,3-Dichloropropene	0.003501	0.993432	0.956951	0.00044	0.0843049	0.999763	1150
cis-1,3-Dimethylcyclohexane	5.9e-05	0.0683126	0.99269	5e-06	0.00108909	0.999973	1151
cis-1,3-Dimethylcyclopentane	8e-05	0.0751085	0.992831	7e-06	0.00117857	0.999973	1152
cis-1,3-Pentadiene	0.001963	0.502616	0.97663	0.000303	0.0254561	0.99988	1153
cis-1,4-Dimethylcyclohexane	4.5e-05	0.0665688	0.992765	3e-06	0.00104486	0.999973	1154
cis-1,8-Terpin	0.0023	1.93838	0.552167	0.001136	2.40421	0.481326	1155
cis-1-Propenylbenzene	0.000244	0.307402	0.978183	2.1e-05	0.0149894	0.999891	1156
cis-2-Butene-1,4-diol.coskf	miscible	#VALUE!	miscible	miscible	#VALUE!	miscible	1157
cis-2-Butene	0.002682	0.364175	0.983763	0.000469	0.0137543	0.999919	1158
cis-2-Decene	2e-06	0.0799424	0.989831	0	0.00189782	0.999959	1159
cis-2-Dodecene	0	0.0622257	0.990243	0	0.0013719	0.999963	1160
cis-2-Heptene	7.6e-05	0.138736	0.98833	6e-06	0.00385915	0.999948	1161
cis-2-Hexene	0.000238	0.178898	0.987417	2.5e-05	0.0053454	0.999942	1162
cis-2-Methylcyclohexanol	0.002278	1.65418	0.768992	0.000754	1.78347	0.778985	1163
cis-2-Nonene	8e-06	0.0938802	0.989489	0	0.00233778	0.999956	1164
cis-2-Octene	2.4e-05	0.112038	0.988973	1e-06	0.00294109	0.999952	1165
cis-2-Pentene	0.000753	0.239738	0.986261	0.000103	0.00779021	0.999934	1166
cis-2-Phenyl-2-butene	9.6e-05	0.243941	0.980088	6e-06	0.0111905	0.999902	1167
cis-3-Heptene	7e-05	0.128759	0.988976	5e-06	0.00338955	0.999951	1168
cis-3-Hexene	0.000205	0.165708	0.988183	2.1e-05	0.00470198	0.999946	1169
cis-3-Methylcyclohexanol	0.001687	1.46285	0.79719	0.000487	1.48849	0.818108	1170
cis-3-Octene	2.4e-05	0.109238	0.989224	1e-06	0.00280695	0.999953	1171
cis-4-Methylcyclohexanol	0.003066	1.89105	0.712813	0.001114	2.18043	0.687486	1172
cis-4-Octene	2.2e-05	0.107042	0.989327	1e-06	0.00271857	0.999954	1173
cis-Crotonaldehyde	0.033929	3.00204	0.685216	0.022688	5.26657	0.763976	1174
cis-Crotonic_acid	0.056614	2.67013	0.434986	0.02526	5.34963	0.518581	1175
cis-Crotonitrile	0.048027	2.78283	0.66442	0.018077	3.14549	0.936911	1176
cis-Decahydronaphthalene	1.5e-05	0.0521314	0.993124	1e-06	0.000744771	0.999976	1177
cis-Dicyano-1-butene	0.056176	1.99994	0.45365	0.009238	2.13881	0.918727	1178
cis-Stilbene	2.3e-05	0.236747	0.976101	1e-06	0.0126017	0.999882	1179
cis,trans-2,4-Hexadiene	0.000569	0.328889	0.980873	6.6e-05	0.014357	0.999903	1180
Citraconic_acid	miscible	#VALUE!	miscible	0.03369	3.0999	0.359073	1181
Citric_acid.coskf	miscible	#VALUE!	miscible	miscible	#VALUE!	miscible	1182
Codeine	7.5e-05	1.31366	0.743995	3e-05	4.067	0.660115	1183
Cortisone_acetate	0.000137	1.27257	0.603195	9.6e-05	2.08869	0.656533	1184
Cortisone	0.002798	1.79456	0.345601	0.005056	2.33467	0.258818	1185
Cumene	0.000154	0.229988	0.982075	1.3e-05	0.00952134	0.999914	1186
Cumene_hydroperoxide	0.001246	1.40776	0.836015	0.000263	1.29764	0.922639	1187
Cyanazine	0.000126	1.21073	0.797147	1.7e-05	1.45379	0.885432	1188
Cyanogen_chloride	0.124311	2.26046	0.771256	0.026698	0.958509	0.994776	1189
Cyanogen	0.042772	2.06521	0.916417	0.008341	0.228853	0.999611	1190
Cyclobutane	0.001771	0.153983	0.992151	0.000326	0.00286101	0.999966	1191
Cycloheptane	0.000101	0.0685689	0.993257	9e-06	0.000983599	0.999975	1192
Cycloheptene	0.000244	0.141657	0.98911	2.7e-05	0.00368335	0.99995	1193
Cyclohexanecarboxaldehyde	0.002491	1.59989	0.845067	0.001333	2.43754	0.90664	1194
Cyclohexane	0.00024	0.0811839	0.993261	2.7e-05	0.00118343	0.999974	1195
Cyclohexanol	0.007113	2.25973	0.655278	0.003337	2.52298	0.624914	1196
Cyclohexanone	0.016764	3.08168	0.58559	0.028744	3.09195	0.324201	1197
Cyclohexanone_oxime	0.006917	2.21415	0.694012	0.002427	2.10418	0.797822	1198
Cyclohexene	0.000651	0.194228	0.987744	8.8e-05	0.00561745	0.999942	1199
Cyclohexyl_acetate	0.000512	1.05495	0.882689	0.0002	1.32555	0.950651	1200
Cyclohexylamine	0.004136	3.4878	0.581495	0.001964	7.7243	0.475855	1201
Cyclohexylbenzene	1.9e-05	0.137282	0.984971	1e-06	0.00474984	0.999933	1202
Cyclohexyl_formate	0.004373	1.9784	0.79278	0.001633	2.11051	0.940974	1203
Cyclohexyl_hydroperoxide	0.005486	2.12032	0.710838	0.001798	1.98802	0.779866	1204
Cyclohexyl_-isocyanate	0.000241	0.282064	0.978223	2.3e-05	0.0137205	0.999876	1205
Cyclohexyl_mercaptan	0.000398	0.332799	0.975992	4.2e-05	0.0166497	0.999865	1206
Cyclonite	0.003026	1.99877	0.823618	0.000106	0.512983	0.99695	1207
Cyclooctane	4.8e-05	0.0618412	0.993122	4e-06	0.000902741	0.999975	1208
Cyclooctene	0.000115	0.113397	0.989907	1e-05	0.00276054	0.999955	1209
Cyclopentadiene	0.006083	0.743873	0.969666	0.001059	0.0448531	0.999841	1210
Cyclopentane	0.000615	0.108291	0.992801	8.8e-05	0.00175102	0.999971	1211
Cyclopentanol	0.014604	2.53337	0.609717	0.007227	2.71383	0.6002	1212
Cyclopentanone.coskf	0.044941	2.83608	0.488563	miscible	#VALUE!	miscible	1213
Cyclopentene	0.001703	0.270841	0.986364	0.00029	0.00874891	0.999934	1214
Cyclopentylacetic_acid	0.009792	2.65581	0.538011	0.004513	3.16731	0.604529	1215
Cyclopentylamine	0.007333	3.79722	0.573218	0.004404	8.41145	0.474724	1216
Cyclopropanecarboxamide.coskf	miscible	#VALUE!	miscible	miscible	#VALUE!	miscible	1217
Cyclopropane_carboxylic_acid	miscible	#VALUE!	miscible	0.066682	2.57871	0.363793	1218
Cyclopropane	0.010071	0.542935	0.982088	0.002514	0.02289	0.99991	1219
Cyclopropylamine.coskf	miscible	#VALUE!	miscible	miscible	#VALUE!	miscible	1220
Cyclopropyl_cyanide	0.119233	1.99807	0.475632	0.03902	3.756	0.875195	1221
Cyclotetramethylenetetranitramine	0.002622	1.88498	0.754468	4.2e-05	0.634509	0.994165	1222
Decachlorobiphenyl	0	0.0461165	0.989214	0	0.00108993	0.999962	1223
Decafluorobutane	2e-05	0.0421458	0.994398	1e-06	0.00046227	0.999981	1224
Decamethylcyclopentasiloxane	0	0.0988123	0.975482	0	0.0278824	0.998983	1225
Decamethyltetrasiloxane	0	0.0794122	0.981326	0	0.042826	0.998287	1226
Decan-1,10-diol	0.00024	1.42626	0.667274	6.5e-05	1.45984	0.664936	1227
Decanal	2.2e-05	0.568211	0.921531	4e-06	0.747686	0.965359	1228
Decane	1e-06	0.0463437	0.992858	0	0.000686888	0.999976	1229
Decanoic_acid	5e-05	0.90547	0.83073	7e-06	0.850885	0.861836	1230
Dehydroabietic_acid	3e-06	0.474768	0.870766	0	0.440776	0.906345	1231
Dehydroabietylamine	1e-06	1.07512	0.755377	0	4.1273	0.650579	1232
Desoxycorticosterone_acetate	2.4e-05	1.14837	0.698289	3e-05	3.3475	0.599977	1233
Desoxycorticosterone	0.000102	1.51046	0.621523	0.000213	3.61779	0.398027	1234
Dexamethasone_acetate	7e-05	1.16908	0.625765	3.2e-05	2.17324	0.62648	1235
Dexamethasone	0.000216	1.33238	0.578105	9.5e-05	2.02758	0.591696	1236
Dextrose.coskf	miscible	#VALUE!	miscible	miscible	#VALUE!	miscible	1237
Di-2-chlorethyl_ether	0.000973	0.976875	0.935218	0.000121	0.490555	0.995729	1238
Di-(2-chloroethoxy)methane	0.001029	1.3743	0.872995	0.000172	1.47716	0.974051	1239
Di-2-ethylhexyl-adipate	0	0.238584	0.92575	0	0.213712	0.981189	1240
Di-2-ethylhexylamine	0	0.0681831	0.984935	0	0.227475	0.986478	1241
Di(2-ethylhexyl)terephthalate	0	0.177883	0.946984	0	0.121724	0.991795	1242
Diacetin.coskf	0.058916	1.57623	0.203181	miscible	#VALUE!	miscible	1243
Diacetone_alcohol	0.018875	3.13613	0.426003	0.039591	2.16097	0.170515	1244
Diallylamine	0.001252	2.53422	0.78281	0.000378	8.60076	0.712122	1245
Diallyl_maleate	0.000241	1.52696	0.794019	7.8e-05	3.72994	0.821947	1246
Diallyl_phthalate	2.6e-05	0.632893	0.90901	1e-06	0.332909	0.992569	1247
Diallyl_sulfide	0.00047	0.510158	0.965818	4e-05	0.0323304	0.999808	1248
Diamantane	5e-06	0.0396917	0.993395	0	0.000521249	0.999978	1249
Diamylamine	5e-06	1.1228	0.801551	1e-06	3.51215	0.695529	1250
Diamyl_ketone	1.1e-05	0.575944	0.90713	2e-06	1.35942	0.893456	1251
Dibenzofuran	0.000105	0.322614	0.973719	6e-06	0.0200091	0.999857	1252
Dibenzo-p-dioxin	6e-05	0.288258	0.974733	3e-06	0.0177713	0.99986	1253
Dibenzopyrrole	0.000911	2.82454	0.782761	0.000296	56.9401	0.669421	1254
Dibenzothiophene	6.8e-05	0.292239	0.974706	4e-06	0.017387	0.999871	1255
Dibenzyl_ether	1.6e-05	0.324883	0.963932	1e-06	0.153701	0.998213	1256
Dibromodifluoromethane	0.000993	0.214644	0.988795	0.000152	0.00699331	0.999945	1257
Dibromomethane	0.010216	1.53442	0.947369	0.001837	0.163685	0.999717	1258
Dibutyl_maleate	5e-06	0.472277	0.922881	0	0.231626	0.992129	1259
Dibutyl_oxalate	3.9e-05	0.790881	0.889027	6e-06	0.852972	0.970934	1260
Dibutyl_sebacate	0	0.474885	0.873176	0	0.875738	0.910563	1261
Dibutyl_terephthalate	1e-06	0.315191	0.938008	0	0.155526	0.993405	1262
Dichlorethanoic_acid	0.11988	1.47439	0.204297	0.048386	6.22358	0.239593	1263
Dichloroacetaldehyde	0.018854	2.77975	0.84394	0.00311	1.23511	0.995057	1264
Dichloroacetyl_chloride	0.001481	0.770449	0.964456	0.000193	0.070964	0.999779	1265
Dichlorodiethylsilane	8.2e-05	0.169789	0.9851	6e-06	0.00603988	0.999933	1266
Dichlorodifluoromethane	0.001379	0.167688	0.9914	0.000236	0.0038065	0.999961	1267
Dichlorofluoromethane	0.008599	1.4842	0.956366	0.001764	0.198847	0.999731	1268
Dichloroformoxine	0.016962	3.37726	0.77883	0.007292	16.8518	0.789799	1269
Dichloromethane	0.019976	2.00306	0.935811	0.004223	0.248669	0.99967	1270
Dichlorosilane	0.001716	0.22306	0.988869	0.0003	0.00622401	0.999948	1271
Dicumyl_peroxide	1e-06	0.221002	0.963076	0	0.203456	0.994563	1272
Dicyandiamide.coskf	miscible	#VALUE!	miscible	miscible	#VALUE!	miscible	1273
Dicyclohexylamine	7e-06	0.690733	0.878877	1e-06	2.4403	0.789935	1274
Dicyclohexyl_sulfide	3e-06	0.116715	0.982919	0	0.00451955	0.999911	1275
Dicyclopentadiene	0.000128	0.167867	0.985346	1.1e-05	0.00569178	0.999932	1276
Diethanolamine.coskf	miscible	#VALUE!	miscible	miscible	#VALUE!	miscible	1277
Diethyl_adipate	0.00015	1.25915	0.8101	9.4e-05	1.9123	0.905278	1278
Diethylaluminum_chloride	0.000763	1.29587	0.932811	6.5e-05	0.227272	0.999258	1279
Diethyl_carbonate	0.003237	1.71504	0.850705	0.00122	1.29071	0.97528	1280
Diethyl_disulfide	0.000255	0.317269	0.977539	2.3e-05	0.0151898	0.999883	1281
Diethylene_glycol.coskf	miscible	#VALUE!	miscible	miscible	#VALUE!	miscible	1282
Diethylene_glycol_diethyl_ether	0.000139	1.21378	0.831648	0.000138	3.02631	0.763096	1283
Diethylene_glycol_dimethyl_ether	0.001522	2.04754	0.762193	0.002452	4.41335	0.671794	1284
Diethylene_glycol_di-n-butyl_ether	2e-06	0.564196	0.890269	1e-06	1.30995	0.873952	1285
Diethylene_glycol_ethyl_ether_acetate.coskf	0.000411	1.57115	0.789104	0.000396	2.98681	0.837555	1286
Diethylene_glycol_monobutyl_ether_acetate.coskf	5.7e-05	1.05805	0.834957	3.5e-05	2.01809	0.880021	1287
Diethylene_glycol_monopropyl_ether	0.001878	2.53368	0.620021	0.00461	3.80844	0.344399	1288
Diethylenetriamine.coskf	miscible	#VALUE!	miscible	miscible	#VALUE!	miscible	1289
Diethylethanolamine	0.003879	2.20184	0.636605	0.001569	3.04828	0.599025	1290
Diethyl_maleate	0.001596	1.6789	0.783229	0.000769	1.70159	0.941532	1291
Diethyl_malonate	0.001474	1.66037	0.810972	0.000518	1.3031	0.9673	1292
Diethyl_oxalate	0.003418	2.20469	0.759538	0.001376	4.04386	0.863733	1293
Diethyl_phthalate	0.000188	1.00686	0.850158	5.4e-05	0.974875	0.963403	1294
Diethyl_succinate	0.000739	1.53652	0.806161	0.000377	1.55173	0.947614	1295
Diethyl_sulfate	0.000986	0.90208	0.932681	8.3e-05	0.0995921	0.999285	1296
Diethyl_sulfide	0.001026	0.485437	0.971491	0.000131	0.0269993	0.999832	1297
Diethylsulfite	0.002818	1.60643	0.853965	0.000773	0.686646	0.9897	1298
Difluoromethane	0.164599	2.49008	0.811757	0.027037	0.779927	0.999129	1299
Difluoromethyl_methyl_ether	0.023041	2.18638	0.909241	0.004309	0.378709	0.999124	1300
Difluoromethyl_trifluoromethyl_ether.coskf	0.003176	1.25793	0.958993	0.000532	0.213365	0.999706	1301
Diglycolic_acid.coskf	miscible	#VALUE!	miscible	miscible	#VALUE!	miscible	1302
Dihexyl_adipate	0	0.357242	0.909613	0	0.380812	0.972835	1303
Diiodomethane	0.003324	0.800863	0.967121	0.00049	0.0635704	0.999821	1304
Diisobutylaluminum_chloride	1.8e-05	0.340892	0.966636	1e-06	0.0336558	0.999746	1305
Diisobutylamine	2e-05	0.324526	0.962893	2e-06	1.44839	0.927621	1306
Diisobutyl_ether	2.2e-05	0.184137	0.9785	2e-06	0.0884667	0.99736	1307
Diisobutyl_ketone	9.2e-05	0.630709	0.921508	2.1e-05	0.978208	0.954435	1308
Diisobutyl_phthalate	1e-06	0.423259	0.917541	0	0.260006	0.988531	1309
Diisodecyl_phthalate	0	0.138877	0.950686	0	0.0866138	0.993094	1310
Diisononyl_phthalate	0	0.137184	0.955176	0	0.0650098	0.995503	1311
Diisooctyl_phthalate	0	0.176082	0.947361	0	0.107759	0.992787	1312
Diisopentylsulfide	2e-06	0.13177	0.982207	0	0.00531155	0.999908	1313
Diisopropanolamine	0.007188	2.63084	0.493901	0.007227	3.29516	0.353366	1314
Diisopropylamine	0.00056	2.10271	0.772981	0.000165	6.2064	0.682854	1315
Diisopropyl_ether	0.000653	1.36023	0.856459	0.000275	3.55221	0.713833	1316
Diisopropyl_ketone	0.001254	1.4142	0.848718	0.000758	2.53939	0.870431	1317
Diisopropyl_sulfide	0.000246	0.315917	0.974387	2.2e-05	0.0165238	0.99985	1318
Diketene	0.028502	2.48794	0.816228	0.004546	0.739483	0.995429	1319
Dilactic_acid.coskf	miscible	#VALUE!	miscible	miscible	#VALUE!	miscible	1320
Dilactide	0.024915	2.25413	0.616589	0.005566	1.89581	0.947274	1321
Dimercaptoethyl_ether	0.001279	1.39524	0.886235	0.000193	1.62912	0.975149	1322
Dimethoxymethane.coskf	0.049614	2.86947	0.5591	miscible	#VALUE!	miscible	1323
Dimethyl_1,4-cyclohexanedicarboxylate.coskf	0.000664	1.45277	0.792071	0.000418	1.75707	0.923896	1324
Dimethyl_2,6-naphthalenedicarboxylate.coskf	6e-05	0.802086	0.880345	1e-05	0.566115	0.982037	1325
Dimethyl_adipate	0.001315	1.81773	0.760079	0.000925	2.28495	0.909388	1326
Dimethyl_carbonate	0.033917	2.64083	0.730836	0.012588	1.96084	0.971118	1327
Dimethylchlorosilane	0.001188	0.364456	0.980972	0.000167	0.016445	0.999904	1328
Dimethyldichlorosilane	0.000696	0.39147	0.977738	8e-05	0.0208752	0.999887	1329
Dimethyldimethoxysilane	0.002392	2.09561	0.76726	0.002324	4.49796	0.578486	1330
Dimethyl_disulfide	0.00511	1.06197	0.946246	0.000652	0.0799076	0.9997	1331
Dimethylethanolamine	0.039668	2.35522	0.355661	0.031373	2.5308	0.276677	1332
Dimethyl_isophthalate	0.001865	1.82136	0.74776	0.000851	1.94708	0.928822	1333
Dimethyl-isosorbide.coskf	0.016669	2.8041	0.374042	miscible	#VALUE!	miscible	1334
Dimethylketene	0.003281	0.560675	0.975203	0.000539	0.0298002	0.999864	1335
Dimethyl_maleate	0.00984	2.35379	0.697787	0.004973	2.17112	0.935871	1336
Dimethylmalonate	0.015783	2.44527	0.678437	0.006104	2.01534	0.948815	1337
Dimethyl_oxalate	0.033735	2.55811	0.616322	0.01164	3.19464	0.910998	1338
Dimethyl_phthalate	0.00104	1.44609	0.815851	0.00033	1.27589	0.962103	1339
Dimethyl_silane	0.001415	0.205991	0.989734	0.000236	0.00554967	0.999952	1340
Dimethyl_succinate	0.008402	2.44934	0.680048	0.00654	2.88203	0.891185	1341
Dimethyl_sulfate	0.008648	1.63902	0.894919	0.000911	0.190734	0.999016	1342
Dimethyl_sulfide	0.01314	1.26668	0.946147	0.002562	0.0949513	0.999706	1343
Dimethyl_sulfoxide.coskf	miscible	#VALUE!	miscible	miscible	#VALUE!	miscible	1344
Dimethyl_terephthalate	0.000342	1.06029	0.872202	7.8e-05	0.631034	0.984507	1345
Di-n-butyl_ether	4e-05	0.60634	0.918263	1e-05	1.58512	0.852263	1346
Di-n-butyl_phthalate	1e-06	0.407204	0.92153	0	0.234552	0.990519	1347
Di-n-butyl_sulfate	1.3e-05	0.340436	0.959816	0	0.0380736	0.999529	1348
Di-n-butyl_sulfide	1.2e-05	0.17565	0.980837	1e-06	0.0076071	0.999895	1349
Di-n-butyl_sulfone	0.000581	1.44925	0.801247	0.000293	1.31677	0.949054	1350
Di-n-decyl_phthalate	0	0.12901	0.953206	0	0.0616983	0.994744	1351
Di-n-heptyl_phthalate	0	0.20546	0.943666	0	0.104107	0.993621	1352
Di-n-hexyl_ether	1e-06	0.30176	0.94054	0	0.78741	0.899423	1353
Di-n-hexyl_phthalate	0	0.270642	0.932189	0	0.163537	0.990515	1354
Dinitrogen_pentoxide	0.005196	0.906711	0.970666	0.000927	0.0776884	0.999834	1355
Dinitrogen_tetroxide	0.016133	2.25395	0.936056	0.00339	0.360719	0.999632	1356
Dinitrogen_trioxide	0.041152	2.47497	0.895825	0.007295	0.361249	0.999337	1357
Di-n-nonyl_phthalate	0	0.146303	0.951528	0	0.0696179	0.99469	1358
Di-n-octylamine	0	0.56436	0.845397	0	2.01416	0.738002	1359
Di-n-octyl_ether	0	0.176999	0.954427	0	0.426133	0.933929	1360
Di-n-octyl_sulfide	0	0.0600878	0.986298	0	0.00182053	0.999941	1361
Di-n-octyl_terephthalate	0	0.159767	0.951598	0	0.0978295	0.99351	1362
Dinonyl_ether	0	0.141692	0.959368	0	0.338932	0.942678	1363
Dinonylphenol	0	0.221553	0.915537	0	0.548536	0.907392	1364
Di-n-pentyl_ether	4e-06	0.416064	0.930204	1e-06	1.13535	0.869756	1365
Di-n-propyl_disulfide	3.1e-05	0.194716	0.981366	2e-06	0.00809828	0.999908	1366
Di-n-propyl_phthalate	1.1e-05	0.579447	0.901832	1e-06	0.474376	0.981208	1367
Di-n-propyl_sulfide	0.000119	0.27505	0.977326	9e-06	0.0133714	0.99987	1368
Di-n-propyl_sulfone	0.00609	2.26032	0.693445	0.005271	2.24204	0.908089	1369
Di-n-undecyl_phthalate	0	0.101205	0.960709	0	0.0514675	0.995461	1370
Dioctyl_adipate	0	0.237783	0.926337	0	0.234576	0.979713	1371
Dioctyl_phthalate	0	0.197356	0.939134	0	0.163321	0.987062	1372
Diolein	0	0.131923	0.918239	0	0.0859395	0.967302	1373
Diphenylacetylene	1.6e-05	0.249423	0.975898	1e-06	0.014139	0.99988	1374
Diphenylamine	0.000243	1.24946	0.892213	3.4e-05	11.638	0.900293	1375
Diphenyldichlorosilane	4e-06	0.17358	0.978968	0	0.00890074	0.999899	1376
Diphenyl_disulfide	1.3e-05	0.228496	0.975598	0	0.0129849	0.999878	1377
Diphenyl_ether	5.8e-05	0.316432	0.973085	3e-06	0.0199366	0.999857	1378
Diphenylglyoxal	8.1e-05	0.643825	0.922124	7e-06	0.334045	0.993566	1379
Diphenylmethane-4,4'-diisocyanate	3e-06	0.231286	0.971244	0	0.0142223	0.999848	1380
Diphenylmethane	3.9e-05	0.262117	0.975005	2e-06	0.0140719	0.999874	1381
Diphenylmethanone	0.00023	0.971225	0.886284	4.8e-05	1.44642	0.954917	1382
Diphenyl-sulfone	0.000278	0.946911	0.882081	3.7e-05	0.460323	0.9905	1383
Dipropylene_glycol	0.01487	2.57546	0.442396	0.017285	2.7182	0.296697	1384
Dipropylene_glycol_monoethyl_ether	0.005218	2.74877	0.352541	0.008236	2.63372	0.160172	1385
Dipropylene_glycol_monomethyl_ether_acetate.coskf	0.000252	1.40738	0.793149	0.000237	3.09272	0.793524	1386
Dipropylene_glycol-monomethyl_ether	0.003093	2.17021	0.620864	0.00309	3.02965	0.507534	1387
Dipropylene_glycol_n-butyl_ether	0.000138	1.8654	0.668744	0.000177	4.18561	0.38444	1388
Dipropylene_glycol_n-propyl_ether	0.000375	2.04827	0.665938	0.000505	4.37866	0.392416	1389
Dipropylene_glycol_t-butyl_ether	0.000535	2.04575	0.629251	0.000799	3.86008	0.334417	1390
Dipropyl_maleate	0.000159	0.979968	0.857737	4.5e-05	0.888356	0.967097	1391
Di-sec-butyl_ether	9.7e-05	0.951536	0.86511	3.3e-05	2.71202	0.696762	1392
Disilane	0.000641	0.0709524	0.994497	9.4e-05	0.000783666	0.999979	1393
Di-tert-butyl_disulfide	1.8e-05	0.150902	0.982276	1e-06	0.00592274	0.999915	1394
Di-tert-butyl_ether	0.000163	0.852692	0.887617	4.8e-05	2.71561	0.74644	1395
Di-tert-butyl_peroxide	7.7e-05	0.481753	0.93971	1.7e-05	1.02316	0.940416	1396
Di-tert-butyl_sulfide	6.6e-05	0.213737	0.97774	4e-06	0.0102499	0.999873	1397
Diuron	0.000191	1.26714	0.808228	3.1e-05	1.50106	0.877141	1398
Divinyl_ether	0.007138	1.37331	0.943646	0.001056	0.144337	0.999638	1399
Dl-aspartic_acid.coskf	miscible	#VALUE!	miscible	miscible	#VALUE!	miscible	1400
Dl-glutamic_acid.coskf	miscible	#VALUE!	miscible	miscible	#VALUE!	miscible	1401
d-Limonene	4.1e-05	0.146758	0.984992	2e-06	0.00496319	0.999931	1402
Docosane	0	0.0224677	0.992327	0	0.000310505	0.999979	1403
Dodecamethylcyclohexasiloxane	0	0.0855626	0.974287	0	0.0454307	0.997713	1404
Dodecamethylpentasiloxane	0	0.0582098	0.98278	0	0.0215856	0.999026	1405
Dodecanal	3e-06	0.390387	0.93591	0	0.434422	0.97753	1406
Dodecane	0	0.0394569	0.992753	0	0.000577319	0.999977	1407
Dodecanedioic_acid	0.000136	1.43078	0.642002	3.6e-05	1.54054	0.646874	1408
Eicosamethylnonasiloxane	0	0.0814834	0.964876	0	0.48123	0.971062	1409
Eicosane	0	0.0244043	0.992426	0	0.000338883	0.999979	1410
Ephedrine	0.000367	1.27828	0.84429	0.000115	3.11451	0.832606	1411
epsilon-Caprolactam.coskf	miscible	#VALUE!	miscible	miscible	#VALUE!	miscible	1412
epsilon-Caprolactone.coskf	0.076168	1.89834	0.294474	miscible	#VALUE!	miscible	1413
Erucic_acid	0	0.234984	0.907215	0	0.196377	0.933416	1414
Estradiol_benzoate	0	0.389063	0.893152	0	0.488106	0.941699	1415
Estradiol	6.1e-05	1.01934	0.759463	6e-06	1.11232	0.857625	1416
Estriol	0.000268	1.40252	0.631929	4.4e-05	1.47742	0.737012	1417
Estrone	0.000102	1.02234	0.757946	1.7e-05	0.943318	0.845729	1418
Ethanamine.coskf	miscible	#VALUE!	miscible	miscible	#VALUE!	miscible	1419
Ethane	0.009721	0.244389	0.991883	0.002667	0.00501465	0.999961	1420
Ethanesulfonyl_chloride	0.006455	1.50974	0.916304	0.000686	0.175775	0.999299	1421
Ethanol.coskf	miscible	#VALUE!	miscible	miscible	#VALUE!	miscible	1422
Ethene	0.03801	1.03358	0.97055	0.010382	0.066817	0.999854	1423
Ethinyl-estradiol	2.6e-05	0.991935	0.78571	2e-06	1.49037	0.85725	1424
Ethisterone	4.8e-05	1.13152	0.695357	2.3e-05	2.36358	0.602414	1425
Ethoxyethane	0.004282	2.10652	0.822723	0.003002	4.28935	0.666563	1426
Ethyl_3-ethoxypropionate	0.000739	1.55188	0.822179	0.000505	2.8272	0.873386	1427
Ethyl_4-hydroxybenzoate	0.001939	2.26644	0.652538	0.000597	2.64221	0.697777	1428
Ethyl_acetate	0.017716	2.89636	0.704961	0.016525	4.39078	0.80248	1429
Ethyl_acetoacetate	0.014916	2.58722	0.624869	0.010288	3.41132	0.851425	1430
Ethyl_acrylate	0.005616	1.994	0.834786	0.002575	2.03204	0.95585	1431
Ethylal	0.006228	2.97935	0.64751	0.009951	3.82777	0.347757	1432
Ethyl_aluminum_dichloride	0.005493	4.67297	0.824671	0.000645	3.34157	0.995945	1433
Ethylbenzene	0.000337	0.282993	0.981042	3.4e-05	0.0123495	0.999906	1434
Ethylbenzene_hydroperoxide	0.004222	2.41343	0.70603	0.001096	3.56531	0.776507	1435
Ethyl_benzoate	0.000353	0.884539	0.912529	7.6e-05	0.623834	0.986404	1436
Ethyl_chloroacetate	0.006516	2.17618	0.822014	0.001486	2.36632	0.963825	1437
Ethyl_chloroformate	0.00323	0.96418	0.950723	0.000457	0.119387	0.999455	1438
Ethyl_cyanoacetate	0.018612	2.46253	0.678751	0.003324	1.4362	0.973836	1439
Ethylcyclohexane	3.5e-05	0.0618461	0.993087	2e-06	0.000909978	0.999975	1440
Ethylcyclopentane	8.1e-05	0.074151	0.992884	7e-06	0.00115335	0.999973	1441
Ethyl_decanoate	2e-06	0.339288	0.941589	0	0.300595	0.985118	1442
Ethyl_dodecanoate	0	0.250937	0.949361	0	0.229043	0.986415	1443
Ethylene_carbonate	miscible	#VALUE!	miscible	0.032706	2.00116	0.951942	1444
Ethylenediaminetetraacetic_acid	0.016541	1.62739	0.38937	0.003249	1.60893	0.665364	1445
Ethylene_glycol_2-ethylhexyl_ether	4.4e-05	0.800009	0.838239	7e-06	0.712085	0.874769	1446
Ethylene_glycol_diacetate	0.007319	2.49225	0.67663	0.005899	3.14044	0.873786	1447
Ethylene_glycol_diacrylate	0.000864	1.48837	0.8303	0.00023	1.04476	0.975061	1448
Ethylene_glycol_dinitrate	0.002971	1.60165	0.915533	0.0002	0.199528	0.99942	1449
Ethylene_glycol_monobutyl_ether_acetate.coskf	0.000271	1.26607	0.841377	0.000154	2.17101	0.896972	1450
Ethylene_glycol_monopropyl_ether	0.011094	2.64055	0.547673	0.008411	2.92958	0.485638	1451
Ethyl_erucate	0	0.102387	0.966631	0	0.0615105	0.995117	1452
Ethyl_fluoride	0.036619	1.7183	0.930221	0.008616	0.176087	0.999579	1453
Ethyl_formate	0.052803	2.77017	0.655387	0.026364	3.41027	0.917331	1454
Ethyl_hexadecanoate	0	0.152089	0.960481	0	0.115524	0.991626	1455
Ethyl_hexanoate	0.00012	0.789296	0.906889	3.2e-05	0.905478	0.966928	1456
Ethyl_hydroperoxide.coskf	miscible	#VALUE!	miscible	miscible	#VALUE!	miscible	1457
Ethylidene_diacetate	0.003753	1.91516	0.793539	0.001224	1.55855	0.964648	1458
Ethyl_iodide	0.005114	0.663567	0.973103	0.000884	0.0372968	0.999861	1459
Ethyl_isoamyl_ketone	0.000493	1.42876	0.825666	0.00029	3.35164	0.763651	1460
Ethyl_isobutyl_ether	0.00037	0.894773	0.909325	0.000142	2.32905	0.836988	1461
Ethyl_isobutyrate	0.001353	1.43604	0.861743	0.000708	2.01872	0.930093	1462
Ethyl_isopropyl_ether	0.00162	1.72361	0.836445	0.001018	3.9299	0.674952	1463
Ethyl_isopropyl_ketone	0.00329	1.96954	0.803819	0.002334	3.89449	0.782437	1464
Ethyl_isovalerate	0.00045	1.01586	0.893597	0.000164	1.19928	0.960246	1465
Ethyl_lactate	0.014933	2.75285	0.585485	0.016246	3.5698	0.603137	1466
Ethyl_levulinate	0.009832	2.72935	0.576896	0.023915	3.95671	0.543144	1467
Ethyl_linoleate	0	0.166595	0.957975	0	0.111786	0.993769	1468
Ethyl_linolenate	0	0.206038	0.950585	0	0.158182	0.992097	1469
Ethyl_mercaptan	0.010632	1.17174	0.952994	0.001993	0.0847311	0.999743	1470
Ethyl_methacrylate	0.001511	1.40727	0.874649	0.000635	1.60556	0.956648	1471
Ethyl_methyl_disulfide	0.001064	0.50566	0.971299	0.000124	0.0292966	0.999845	1472
Ethyl_n-butyrate	0.001355	1.50746	0.856385	0.000691	2.14534	0.929141	1473
Ethyl_n-hexyl_ether	4.1e-05	0.62795	0.915279	1.1e-05	1.62757	0.847797	1474
Ethyl_n-octyl_sulfide	1e-06	0.123711	0.982849	0	0.00484176	0.999913	1475
Ethyl_nonanoate	4e-06	0.415353	0.93397	1e-06	0.431388	0.979408	1476
Ethylnorbornene	7.6e-05	0.12117	0.988789	6e-06	0.00326674	0.99995	1477
Ethyl_n-pentyl_sulfide	3.3e-05	0.210297	0.979739	2e-06	0.00955945	0.999886	1478
Ethyl_octanoate	1.3e-05	0.496137	0.92805	2e-06	0.532732	0.976528	1479
Ethyl_oleate	0	0.145072	0.959927	0	0.137204	0.989966	1480
Ethyl_p-aminobenzoate	0.002224	2.25343	0.693571	0.000562	2.75421	0.830982	1481
Ethyl_pentanoate	0.000376	1.04869	0.889989	0.000136	1.26346	0.958228	1482
Ethyl_phenyl_acetate	0.000331	1.01482	0.890409	6.7e-05	1.0152	0.975915	1483
Ethyl_propanoate	0.004562	2.01841	0.819824	0.002758	2.91235	0.908421	1484
Ethyl_propyl_disulfide	0.000105	0.25558	0.979264	7e-06	0.0117836	0.999893	1485
Ethyl_propyl_ether	0.001285	1.48806	0.862661	0.000743	3.44452	0.740864	1486
Ethyl_propyl_sulfide	0.000327	0.365911	0.974105	3.3e-05	0.019255	0.999848	1487
Ethyl_tert-butyl_disulfide	7.2e-05	0.200932	0.981228	5e-06	0.00841577	0.999907	1488
Ethyl-tert-butyl_sulfide	0.000211	0.288749	0.976493	1.9e-05	0.0142829	0.999866	1489
Ethyl_tert-pentyl_ether	0.000292	1.04556	0.873617	0.000123	2.90503	0.727649	1490
Ethyl_tetradecanoate	0	0.193924	0.955202	0	0.162085	0.989362	1491
Ethylthioethanol	0.01357	2.80693	0.605452	0.004649	3.39793	0.75093	1492
Ethyl_thiolacetate	0.005351	1.86911	0.846102	0.002142	1.88274	0.9601	1493
Ethyltrichlorosilane	0.000117	0.147035	0.988125	1e-05	0.00453211	0.999947	1494
Ethyl_trimethyl_acetate	0.000547	0.98032	0.895936	0.000206	1.39784	0.948166	1495
Ethyl_undecanoate	1e-06	0.291145	0.945631	0	0.257054	0.98617	1496
Ethyl_vanillin	0.001759	1.93315	0.735446	0.000574	2.17982	0.840353	1497
Ethyl_vinyl_ether	0.005825	1.35995	0.92707	0.001302	0.597471	0.99503	1498
Ethynylbenzene	0.001227	0.756687	0.961	0.000132	0.0627047	0.999776	1499
Fentanyl	2e-06	1.07931	0.733334	1e-06	4.17647	0.52021	1500
Fluoranthene	2.3e-05	0.239259	0.975869	1e-06	0.013555	0.99988	1501
Fluorene	8.1e-05	0.300579	0.973926	4e-06	0.0169799	0.999867	1502
Fluorine	0.059732	0.349528	0.991589	0.020857	0.00888579	0.999956	1503
Fluorobenzene	0.002496	0.651088	0.970794	0.000355	0.0429493	0.999846	1504
Fluosulfonic_acid.coskf	miscible	#VALUE!	miscible	miscible	#VALUE!	miscible	1505
Flurbiprofen	8.7e-05	1.35246	0.776426	1.1e-05	3.07773	0.770963	1506
Formaldehyde.coskf	miscible	#VALUE!	miscible	miscible	#VALUE!	miscible	1507
Formamide.coskf	miscible	#VALUE!	miscible	miscible	#VALUE!	miscible	1508
Formanilide	0.022285	2.87014	0.500381	0.007245	4.17179	0.688713	1509
Formic_acid.coskf	miscible	#VALUE!	miscible	miscible	#VALUE!	miscible	1510
Fumaric_acid.coskf	miscible	#VALUE!	miscible	miscible	#VALUE!	miscible	1511
Fumaronitrile	0.085321	2.15679	0.54912	0.007122	1.23617	0.986479	1512
Furan_2,5-dicarboxylic_acid.coskf	miscible	#VALUE!	miscible	miscible	#VALUE!	miscible	1513
Furan	0.016911	1.608	0.938354	0.003242	0.172297	0.999651	1514
Furfural	0.163142	1.37757	0.313046	0.086937	2.94216	0.453059	1515
Furfuryl_alcohol	0.04623	2.70689	0.474347	0.016044	4.79578	0.650847	1516
gamma-Aminopropyltriethoxysilane	3e-05	1.50961	0.724634	1.7e-05	4.72326	0.550868	1517
gamma-Butyrolactone.coskf	miscible	#VALUE!	miscible	miscible	#VALUE!	miscible	1518
gamma-Terpinene	2.6e-05	0.127794	0.986682	1e-06	0.00390048	0.999941	1519
gamma-Valerolactone	0.068174	2.3252	0.451356	0.094848	2.96533	0.568108	1520
Ganciclovir.coskf	miscible	#VALUE!	miscible	miscible	#VALUE!	miscible	1521
GB	0.009837	3.06312	0.578955	0.017683	3.73392	0.321315	1522
Germanium_tetrachloride	0.000172	0.134529	0.990438	1.7e-05	0.0037881	0.999959	1523
Germanium_tetrafluoride	0.019461	3.67056	0.900947	0.004144	1.20971	0.99902	1524
Germanium_tetrahydride	0.016931	0.259731	0.992544	0.005149	0.00493878	0.999964	1525
GF	0.001186	2.02038	0.724965	0.001246	4.22574	0.608706	1526
Glutamic_acid.coskf	miscible	#VALUE!	miscible	miscible	#VALUE!	miscible	1527
Glutaraldehyde.coskf	miscible	#VALUE!	miscible	miscible	#VALUE!	miscible	1528
Glutaric_acid.coskf	miscible	#VALUE!	miscible	miscible	#VALUE!	miscible	1529
Glutaric_anhydride	0.10242	1.74313	0.453781	0.015923	1.74182	0.952987	1530
Glutaronitrile	miscible	#VALUE!	miscible	0.025603	2.18349	0.863867	1531
Glycerol.coskf	miscible	#VALUE!	miscible	miscible	#VALUE!	miscible	1532
Glycerol_tricaprylate	0	0.208651	0.923093	0	0.182388	0.983491	1533
Glyceryl_triacetate	0.00167	1.90816	0.68328	0.000949	2.10435	0.900465	1534
Glycol_aldehyde.coskf	miscible	#VALUE!	miscible	miscible	#VALUE!	miscible	1535
Glycolic_acid.coskf	miscible	#VALUE!	miscible	miscible	#VALUE!	miscible	1536
Glyoxal	miscible	#VALUE!	miscible	0.028465	1.25975	0.989301	1537
Guaiacol	0.002922	1.69588	0.871426	0.00058	2.44197	0.944032	1538
Haloperidol	1e-06	0.74919	0.813504	0	1.73685	0.848199	1539
Halothane	0.001087	0.654424	0.970918	0.00015	0.0696322	0.999812	1540
Heptadecane	0	0.0280309	0.992587	0	0.000391787	0.999979	1541
Heptafluoropropyl_methyl_ether	0.000134	0.203874	0.984752	1.2e-05	0.00879296	0.999926	1542
Heptanal	0.000684	1.24655	0.876259	0.000249	1.76402	0.938812	1543
Heptane	2.6e-05	0.0683183	0.99282	2e-06	0.00106623	0.999974	1544
Hexachloro-1,3-butadiene	1e-05	0.0833159	0.990162	0	0.00204916	0.99996	1545
Hexachlorobenzene	7e-06	0.0850407	0.989361	0	0.00216463	0.999957	1546
Hexachlorocyclopentadiene	9e-06	0.0873565	0.989492	0	0.00227005	0.999957	1547
Hexachloroethane	7.6e-05	0.129717	0.988027	6e-06	0.00400842	0.999948	1548
Hexadecamethylheptasiloxane	0	0.0509788	0.979406	0	0.0182803	0.998857	1549
Hexadecane	0	0.0297126	0.992622	0	0.000420219	0.999978	1550
Hexaethylbenzene	0	0.0559393	0.988395	0	0.00140306	0.999955	1551
Hexafluoro-1,3-butadiene	0.000221	0.134368	0.990507	2.4e-05	0.00323903	0.999959	1552
Hexafluoroacetone	0.000422	0.231383	0.986242	5.1e-05	0.0104122	0.999931	1553
Hexafluorobenzene	0.000158	0.174803	0.986972	1.5e-05	0.00575313	0.999942	1554
Hexafluoroethane	0.000769	0.132596	0.992226	0.000114	0.00283881	0.999966	1555
Hexafluoropropylene	0.000434	0.155708	0.990454	5.6e-05	0.0040665	0.999956	1556
Hexahydroindan	2.9e-05	0.0584213	0.993106	2e-06	0.000851038	0.999975	1557
Hexamethylbenzene	1e-05	0.112657	0.986171	0	0.00349588	0.999939	1558
Hexamethylcyclotrisiloxane	1.7e-05	0.392431	0.943008	2e-06	0.345794	0.987587	1559
Hexamethyldisilazane	1.1e-05	0.160615	0.980374	1e-06	0.100861	0.997871	1560
Hexamethyldisiloxane	1e-05	0.159729	0.980201	1e-06	0.0823209	0.998132	1561
Hexamethylenediamine	0.006567	3.77891	0.338253	0.006612	5.76606	0.219819	1562
Hexamethyleneimine	0.001049	1.97715	0.791261	0.000344	5.2017	0.696776	1563
Hexamethylenetetramine.coskf	miscible	#VALUE!	miscible	miscible	#VALUE!	miscible	1564
Hexamethyl_phosphoramide	0.001206	2.86412	0.440713	0.001468	3.44134	0.232463	1565
Hexanal	0.00209	1.74975	0.841414	0.001078	2.95655	0.893223	1566
Hexanamide	0.012092	2.52885	0.432756	0.005838	2.78209	0.463663	1567
Hexane	7.4e-05	0.0791919	0.992837	6e-06	0.00125125	0.999973	1568
Hexanenitrile	0.003273	1.89202	0.83351	0.001033	1.8019	0.961182	1569
Hexyl_acetate	0.000168	0.941632	0.888506	5.4e-05	1.27216	0.948891	1570
Hexylene_glycol	0.006716	2.41093	0.585603	0.004282	3.15131	0.500186	1571
Hydracrylonitrile.coskf	miscible	#VALUE!	miscible	miscible	#VALUE!	miscible	1572
Hydrazine.coskf	miscible	#VALUE!	miscible	miscible	#VALUE!	miscible	1573
Hydrazobenzene	0.00059	3.31632	0.69931	0.000164	44.3296	0.572855	1574
Hydrocortisone_acetate	9.2e-05	1.15022	0.614153	3.8e-05	1.52213	0.683034	1575
Hydrocortisone	0.000353	1.39478	0.546088	0.000237	1.97827	0.531817	1576
Hydrogen_bromide	miscible	#VALUE!	miscible	0.068009	1.93989	0.998389	1577
Hydrogen_chloride	miscible	#VALUE!	miscible	0.141975	4.01348	0.994939	1578
Hydrogen	0.494349	0.553916	0.983623	0.240173	0.0343592	0.999915	1579
Hydrogen_cyanide	miscible	#VALUE!	miscible	0.223528	3.10219	0.946372	1580
Hydrogen_fluoride.coskf	miscible	#VALUE!	miscible	miscible	#VALUE!	miscible	1581
Hydrogen_iodide	0.071276	2.00247	0.938299	0.01901	0.296844	0.99971	1582
Hydrogen_peroxide.coskf	miscible	#VALUE!	miscible	miscible	#VALUE!	miscible	1583
Hydrogen_selenide	miscible	#VALUE!	miscible	0.074956	0.422274	0.99902	1584
Hydrogen_sulfide	0.398496	1.39426	0.641417	0.049706	0.604086	0.998945	1585
Hydromorphinone	0.000293	1.35599	0.710612	7.1e-05	2.05374	0.807899	1586
Hydroxyacetonitrile.coskf	miscible	#VALUE!	miscible	miscible	#VALUE!	miscible	1587
Hydroxylamine.coskf	miscible	#VALUE!	miscible	miscible	#VALUE!	miscible	1588
Hydroxypivalyl_hydroxypivalate	0.000749	1.97432	0.649889	0.000925	3.88324	0.414078	1589
Hypochlorous_acid.coskf	miscible	#VALUE!	miscible	miscible	#VALUE!	miscible	1590
Hypophosphorous_acid.coskf	miscible	#VALUE!	miscible	miscible	#VALUE!	miscible	1591
Ibuprofen	6.6e-05	1.057	0.807106	9e-06	1.57625	0.816649	1592
Indane	0.000229	0.237521	0.982512	2.2e-05	0.00945727	0.999916	1731
Indene	0.000574	0.420036	0.973606	5.8e-05	0.0234193	0.999864	1732
Indole	0.008265	4.47873	0.709749	0.004032	67.2974	0.639065	1733
Inositol.coskf	miscible	#VALUE!	miscible	miscible	#VALUE!	miscible	1734
Iodine	0.004074	0.421468	0.983567	0.000782	0.0206037	0.999915	1735
Iodobenzene	0.000519	0.355545	0.979	5.7e-05	0.0187108	0.999894	1736
Isobutane	0.000947	0.130738	0.992316	0.000148	0.00232797	0.999968	1737
Isobutene	0.003432	0.426132	0.981613	0.000605	0.0179134	0.999906	1738
Isobutyl_acetate	0.001632	1.6143	0.843501	0.000868	2.30761	0.919001	1739
Isobutyl_acrylate	0.000565	1.01633	0.901283	0.000164	0.848319	0.978765	1740
Isobutylamine	0.010968	3.99466	0.539109	0.007147	8.19268	0.445294	1741
Isobutylbenzene	5.3e-05	0.172612	0.983985	3e-06	0.00641239	0.999926	1742
Isobutylchloride	0.001274	0.409141	0.978316	0.000176	0.0194558	0.999888	1743
Isobutylcyclohexane	5e-06	0.0495243	0.992977	0	0.000722359	0.999976	1744
Isobutylene_glycol.coskf	miscible	#VALUE!	miscible	miscible	#VALUE!	miscible	1745
Isobutyl_formate	0.004849	1.81369	0.848409	0.001638	1.63333	0.967791	1746
Isobutyl_isobutyrate	0.000152	0.783659	0.905421	4.7e-05	1.0291	0.955695	1747
Isobutyl_isopropyl_ether	0.00013	0.589574	0.933315	3.6e-05	1.65781	0.879471	1748
Isobutyl_mercaptan	0.001105	0.453738	0.974356	0.000141	0.0242538	0.999858	1749
Isobutyl_methacrylate	0.000211	0.801545	0.909982	5.7e-05	0.881771	0.969769	1750
Isobutyl-tert-butyl_ether	7e-05	0.599295	0.922121	1.6e-05	1.95944	0.826672	1751
Isobutyric_acid	0.046033	2.56063	0.448262	0.022604	3.6557	0.526937	1752
Isobutyric_anhydride	0.000416	0.943053	0.896928	8.9e-05	0.484966	0.990184	1753
Isonicotinamide.coskf	miscible	#VALUE!	miscible	miscible	#VALUE!	miscible	1754
Isonicotinic_acid	0.041956	2.32173	0.393553	0.011981	3.54278	0.643755	1755
Isopentyl_acetate	0.000704	1.30699	0.860696	0.000299	1.84076	0.931898	1756
Isopentyl_butyrate	6.4e-05	0.678496	0.911364	1.6e-05	0.78966	0.96735	1757
Isopentyl_isovalerate	2.2e-05	0.482319	0.931433	3e-06	0.436069	0.982192	1758
Isophorone	0.004373	2.82982	0.56811	0.006744	3.71032	0.313015	1759
Isophorone_diisocyanate	8e-06	0.223434	0.971737	0	0.0128768	0.999842	1760
Isophthalic_acid	0.031315	2.46204	0.253078	0.021466	4.00293	0.209744	1761
Isophthaloyl_chloride	0.000128	0.423822	0.963156	8e-06	0.0377697	0.999714	1762
Isopimaric_acid	1e-05	0.58078	0.833655	1e-06	0.443388	0.883877	1763
Isoprene	0.001968	0.454364	0.978674	0.000311	0.0217847	0.999891	1764
Isopropyl_acetate	0.005664	2.16634	0.798057	0.004022	3.29793	0.879889	1765
Isopropyl_acrylate	0.001701	1.5012	0.865254	0.000723	1.88147	0.947134	1766
Isopropyl_butyl_ether	0.000165	0.908061	0.890882	6.2e-05	2.46741	0.776829	1767
Isopropylcyclohexane	1.7e-05	0.0562211	0.992969	1e-06	0.000835867	0.999975	1768
Isopropylcyclopentane	3.8e-05	0.0659443	0.992781	3e-06	0.00103224	0.999973	1769
Isopropyl_iodide	0.001764	0.459536	0.976973	0.000264	0.0226035	0.999882	1770
Isopropyl_mercaptan	0.003867	0.735573	0.964919	0.000582	0.0459517	0.999801	1771
Isopropyl_myristate	0	0.178189	0.955011	0	0.164475	0.986933	1772
Isoquinoline	0.003616	3.09876	0.672404	0.001574	8.32555	0.567491	1773
Isovaleric_acid	0.012966	2.82461	0.604662	0.006027	3.71941	0.65104	1774
Isoxazole	miscible	#VALUE!	miscible	0.05362	6.11459	0.708387	1775
Itaconic_acid.coskf	miscible	#VALUE!	miscible	miscible	#VALUE!	miscible	1776
Ketene	0.059696	2.08992	0.925337	0.013337	0.248869	0.999672	1777
Lactic_acid.coskf	miscible	#VALUE!	miscible	miscible	#VALUE!	miscible	1778
Lactonitrile.coskf	miscible	#VALUE!	miscible	miscible	#VALUE!	miscible	1779
L-Aspartic_acid.coskf	miscible	#VALUE!	miscible	miscible	#VALUE!	miscible	1780
Levulinic_acid.coskf	miscible	#VALUE!	miscible	miscible	#VALUE!	miscible	1781
Lidocaine	6e-05	1.74533	0.653117	1.4e-05	4.88104	0.583907	1782
Linoleic_acid	0	0.388056	0.888548	0	0.352534	0.923228	1783
Linolenic_acid	0	0.419242	0.884026	0	0.403186	0.919944	1784
L-Menthol	0.000251	1.15844	0.802989	9.4e-05	2.14722	0.69348	1785
L-Phenylalanine	0.005149	2.62909	0.605545	0.001019	4.51076	0.74163	1786
Lysine	0.023709	2.29683	0.338353	0.008412	4.13165	0.518543	1787
Malathion	5e-06	0.546447	0.899842	0	0.641628	0.979334	1788
Maleic_acid.coskf	miscible	#VALUE!	miscible	miscible	#VALUE!	miscible	1789
Maleic_anhydride	0.053007	2.39337	0.7105	0.005376	0.723091	0.99424	1790
Maleonitrile	0.076155	2.29915	0.585449	0.006683	1.18464	0.989217	1791
Malic_acid.coskf	miscible	#VALUE!	miscible	miscible	#VALUE!	miscible	1792
Malonic_acid.coskf	miscible	#VALUE!	miscible	miscible	#VALUE!	miscible	1793
Malononitrile	miscible	#VALUE!	miscible	0.017482	2.40727	0.973712	1794
m-Anisic_acid	0.005422	2.69873	0.642179	0.001632	4.62692	0.669772	1795
m-Chloroaniline	0.008687	4.83188	0.738299	0.005422	91.0924	0.748967	1796
m-Chlorobenzoyl_chloride	0.0002	0.384625	0.971147	1.6e-05	0.0310435	0.999792	1797
m-Chloronitrobenzene	0.001086	0.932623	0.933858	0.000129	0.25954	0.998046	1798
m-Chlorophenol	0.010017	5.12344	0.581262	0.005346	29.1669	0.526947	1799
m-Cresol	0.009388	3.85061	0.640205	0.003909	13.8065	0.643994	1800
m-Cymene	4.7e-05	0.173523	0.983813	3e-06	0.00648424	0.999925	1801
m-Dibromobenzene	0.000219	0.312841	0.979208	1.9e-05	0.0172345	0.999893	1802
m-Diethylbenzene	3.9e-05	0.158688	0.984755	2e-06	0.0054995	0.999931	1803
m-Diisopropylbenzene	7e-06	0.121642	0.985388	0	0.0040812	0.999936	1804
m-Diisopropylbenzene_hydroperoxide	4.9e-05	1.43957	0.798256	8e-06	11.4203	0.700516	1805
m-Dinitrobenzene	0.002787	1.43213	0.87738	0.000255	0.392755	0.995934	1806
m-Divinylbenzene	0.000188	0.386439	0.972233	1.3e-05	0.0240197	0.999854	1807
Mefenamic_acid	3e-05	0.997888	0.832435	3e-06	3.2522	0.810303	1808
Melamine.coskf	miscible	#VALUE!	miscible	miscible	#VALUE!	miscible	1809
Meperidine	1.6e-05	1.03436	0.820316	3e-06	4.09919	0.747029	1810
Mesitylene	9.5e-05	0.199686	0.983539	7e-06	0.00756483	0.999923	1811
Mesityl_oxide	0.005737	2.56829	0.740089	0.004482	5.23944	0.678243	1812
Mestanolone	3.1e-05	0.980345	0.725741	1.7e-05	2.1042	0.590331	1813
Methacetin	0.003861	2.34222	0.632646	0.001136	3.09925	0.747043	1814
Methacrolein	0.033924	2.84197	0.713064	0.019881	4.09107	0.880854	1815
Methacrylic_acid	0.069905	2.29284	0.375386	0.032044	4.20751	0.458257	1816
Methacrylonitrile	0.032749	2.74279	0.748313	0.010497	2.23822	0.969804	1817
Methanamine.coskf	miscible	#VALUE!	miscible	miscible	#VALUE!	miscible	1818
Methane	0.056183	0.448768	0.989211	0.018919	0.0152189	0.999942	1819
Methanedienone	0.000142	1.55596	0.576144	0.000165	2.95081	0.343415	1820
Methanesulfonyl_chloride	0.020265	2.48739	0.860963	0.002256	0.402113	0.998844	1821
Methanol.coskf	miscible	#VALUE!	miscible	miscible	#VALUE!	miscible	1822
Metharbital	0.0055	1.93536	0.606999	0.003348	1.9772	0.714268	1823
Methoxyacetic_acid.coskf	miscible	#VALUE!	miscible	miscible	#VALUE!	miscible	1824
Methoxyacetone.coskf	miscible	#VALUE!	miscible	miscible	#VALUE!	miscible	1825
Methoxybenzene	0.001629	0.829444	0.949654	0.000238	0.197814	0.998719	1826
Methoxydihydropyran	0.002884	1.40308	0.889037	0.000902	1.20103	0.978982	1827
Methoxymethane.coskf	0.153057	1.87104	0.434082	miscible	#VALUE!	miscible	1828
Methyl-3-mercaptopropionate	0.007548	2.15572	0.803622	0.00185	1.83406	0.970102	1829
Methyl_4-dimethylaminobenzoate	0.000353	1.24193	0.847718	0.00012	1.8916	0.92608	1830
Methyl-4-formylbenzoate	0.001927	1.66126	0.814967	0.000611	1.31541	0.96888	1831
Methyl_acetate	0.086512	2.40133	0.521738	0.079203	3.59416	0.720522	1832
Methyl_acetoacetate	0.023337	2.62091	0.637143	0.013176	3.23845	0.890046	1833
Methyl_acrylate	0.019995	2.82339	0.73567	0.012289	3.74809	0.896117	1834
Methyl_alpha-hydroxyisobutyrate	0.0093	2.80317	0.678042	0.007621	5.2204	0.632376	1835
Methyl_alpha-methoxyisobutyrate	0.007349	2.53569	0.678414	0.009337	4.77347	0.61581	1836
Methyl_benzoate	0.001273	1.2162	0.894285	0.000315	0.879814	0.984423	1837
Methyl_bromide	0.037412	1.67368	0.941148	0.008234	0.152239	0.999726	1838
Methyl_caprylate	5.4e-05	0.631491	0.919266	1.1e-05	0.671293	0.974622	1839
Methyl_carbamate.coskf	miscible	#VALUE!	miscible	miscible	#VALUE!	miscible	1840
Methyl_chloroacetate	0.022148	2.61001	0.757513	0.005337	1.81828	0.978223	1841
Methyl_chloroformate	0.011693	1.60181	0.928009	0.001967	0.221199	0.999248	1842
Methyl_chlorosilane	0.002237	0.338505	0.984187	0.000386	0.01308	0.999922	1843
Methyl_cyanoacetate	0.067509	2.08139	0.517639	0.008223	1.54316	0.967108	1844
Methylcyclohexane	0.000102	0.072889	0.99303	9e-06	0.00109622	0.999974	1845
Methylcyclopentadiene	0.001508	0.430538	0.978097	0.000219	0.0205952	0.999887	1846
Methylcyclopentane	0.000225	0.0899471	0.992784	2.5e-05	0.00144001	0.999972	1847
Methyl_decanoate	6e-06	0.418486	0.935396	1e-06	0.428622	0.981218	1848
Methyl_dichlorosilane	0.001108	0.33464	0.982576	0.000158	0.0149133	0.999913	1849
Methyl_diethanolamine.coskf	miscible	#VALUE!	miscible	miscible	#VALUE!	miscible	1850
Methyl_dodecanoate	1e-06	0.294448	0.946194	0	0.268399	0.986364	1851
Methyl_erucate	0	0.126256	0.96078	0	0.0880588	0.993073	1852
Methylethanolamine.coskf	miscible	#VALUE!	miscible	miscible	#VALUE!	miscible	1853
Methyl_ethyl_ether	0.018522	3.06998	0.731849	0.017835	4.41947	0.536286	1854
Methyl-ethyl_sulfide	0.003827	0.768104	0.962581	0.00058	0.0491702	0.999781	1855
Methyl_fluoride	0.194106	1.88337	0.852323	0.037248	0.312076	0.999399	1856
Methyl_formate	miscible	#VALUE!	miscible	0.1094	3.02993	0.872415	1857
Methylgermanium_trichloride	0.000972	0.611336	0.970779	0.00011	0.0526806	0.999838	1858
Methylglutaronitrile	0.067266	1.88738	0.41538	0.014493	2.39194	0.893633	1859
Methyl_glycolate	miscible	#VALUE!	miscible	0.099896	2.75555	0.469141	1860
Methyl_hydroperoxide.coskf	miscible	#VALUE!	miscible	miscible	#VALUE!	miscible	1861
Methyl_iodide	0.016989	1.12068	0.962767	0.003912	0.0812945	0.999813	1862
Methyl_isobutyl_ether	0.001184	1.04754	0.91135	0.000507	2.14821	0.894955	1863
Methyl_isobutyl_ketone	0.004227	2.21995	0.773796	0.003214	4.55178	0.719873	1864
Methyl_isobutyrate	0.005023	1.91015	0.830966	0.002806	2.48344	0.928068	1865
Methyl_isocyanate	0.024882	1.64904	0.936908	0.005182	0.139582	0.999684	1866
Methyl_isopropenyl_ketone	0.018255	3.02067	0.655613	0.019514	4.73439	0.555438	1867
Methyl_isopropyl_sulfide	0.00159	0.572203	0.9668	0.000216	0.0343384	0.999804	1868
Methyl_lactate.coskf	miscible	#VALUE!	miscible	miscible	#VALUE!	miscible	1869
Methyl_linoleate	0	0.220031	0.948059	0	0.202766	0.988971	1870
Methyl_linolenate	0	0.231763	0.949957	0	0.216954	0.990065	1871
Methyl_maleic_anhydride	0.018408	2.18395	0.804205	0.002441	0.607445	0.994362	1872
Methyl_mercaptan	0.044246	1.89435	0.920414	0.009036	0.17955	0.999629	1873
Methyl_methacrylate	0.005914	1.90949	0.844005	0.002564	1.75924	0.964377	1874
Methyl_n-butyl_ether	0.001506	1.53731	0.860557	0.000879	3.39629	0.766907	1875
Methyl-n-butyl_sulfide	0.000334	0.365447	0.974401	3.3e-05	0.0191169	0.999852	1876
Methyl_n-butyrate	0.004961	2.01473	0.822648	0.002663	2.87347	0.917365	1877
Methyl_nicotinate	0.007783	3.07223	0.617048	0.006603	6.49803	0.55142	1878
Methyl_nonafluoro-n-butyl_ether	3e-05	0.138731	0.986472	2e-06	0.00522062	0.999938	1879
Methylnorbornene	0.000161	0.131504	0.989331	1.5e-05	0.00340896	0.999952	1880
Methyl_n-pentyl_ether	0.00044	1.10746	0.884476	0.000199	2.5643	0.810036	1881
Methyl_n-propyl_ether	0.00562	2.23031	0.812123	0.004326	4.32249	0.67063	1882
Methyl-n-propyl_sulfide	0.001088	0.516232	0.970037	0.000137	0.0297056	0.999822	1883
Methyl_oleate	0	0.165171	0.958502	0	0.122638	0.992687	1884
Methyl_palmitoleate	0	0.223283	0.950207	0	0.192196	0.989366	1885
Methyl_p-aminobenzoate	0.007667	2.69959	0.61712	0.00208	3.7433	0.789164	1886
Methyl_para-toluate	0.000531	1.0089	0.901459	0.000119	0.781822	0.983354	1887
Methyl_pentyl_sulfide	0.000111	0.280008	0.976929	8e-06	0.0137977	0.999869	1888
m-Ethylphenol	0.003342	2.96896	0.719909	0.000981	10.4325	0.711307	1889
Methyl_phenyl_sulfide	0.000821	0.603362	0.962474	7.4e-05	0.0414399	0.999795	1890
Methyl-phosphonic_acid_dimethyl_ester.coskf	miscible	#VALUE!	miscible	miscible	#VALUE!	miscible	1891
Methyl_p-hydroxybenzoate	0.007319	2.7908	0.566559	0.002553	3.88445	0.617525	1892
Methyl_propionate	0.020065	3.00855	0.670957	0.02251	4.6221	0.695699	1893
Methyl_salicylate	0.000658	0.812617	0.93392	9.2e-05	0.269913	0.996763	1894
Methyl_sec-butyl_ether	0.002165	1.82194	0.827256	0.001393	3.94857	0.67493	1895
Methyl_silane	0.003398	0.194533	0.991357	0.000673	0.00439391	0.99996	1896
Methyl_silicate	0.001136	1.30791	0.86327	0.000637	1.63362	0.947564	1897
m-Ethylstyrene	9.9e-05	0.276991	0.977587	6e-06	0.0139849	0.999887	1898
Methyl-t-butyl_sulfide	0.000721	0.418475	0.971501	8.1e-05	0.0231932	0.999833	1899
Methyl_tert-pentyl_ether	0.001219	1.56918	0.828891	0.000707	3.62251	0.660714	1900
Methyltestosterone	7.7e-05	1.28728	0.64237	7e-05	2.63351	0.435875	1901
m-Ethyltoluene	0.00011	0.205051	0.98329	8e-06	0.00784318	0.999921	1902
Methyl_t-pentyl_sulfide	0.000272	0.290857	0.976629	2.5e-05	0.0142116	0.999869	1903
Methyl_trichlorosilane	0.000392	0.253758	0.98429	4.6e-05	0.0109979	0.999923	1904
Methyl_vinyl_dichlorosilane	0.00039	0.362989	0.977147	3.9e-05	0.020178	0.999883	1905
Methyl_vinyl_ether	0.021932	2.09798	0.89061	0.005853	0.861781	0.994649	1906
Mitotane	1e-06	0.180383	0.975361	0	0.0108982	0.999876	1907
m-Methylstyrene	0.00024	0.333436	0.976665	2e-05	0.0174458	0.999882	1908
m-Nitroaniline	0.017117	3.80754	0.574938	0.006323	19.1401	0.707199	1909
m-Nitrobenzaldehyde	0.006545	2.00057	0.790091	0.001235	1.40788	0.975481	1910
Monobutyl_sulfate	0.005278	4.77364	0.492026	0.00215	23.9338	0.403435	1911
Monochlorosilane	0.004554	0.248128	0.98944	0.000937	0.00653674	0.999949	1912
Monoethanolamine.coskf	miscible	#VALUE!	miscible	miscible	#VALUE!	miscible	1913
Monomethyl_terephthalate	0.003274	2.3519	0.625504	0.00109	3.35357	0.636449	1914
Monomethyl_urea.coskf	miscible	#VALUE!	miscible	miscible	#VALUE!	miscible	1915
Monoolein	0	0.427555	0.847589	0	0.397877	0.902832	1916
Mono-tert-butylhydroquinone	0.004524	4.32858	0.512509	0.002136	23.9127	0.416375	1917
Monuron	0.00053	1.61318	0.775431	0.000117	2.16504	0.842966	1918
Morniflumate	0	0.597994	0.873239	0	3.11642	0.837284	1919
Morphine	0.000264	1.31424	0.712892	4.9e-05	1.77945	0.804084	1920
Morpholine.coskf	miscible	#VALUE!	miscible	miscible	#VALUE!	miscible	1921
m-Phenylenediamine	0.115031	1.84039	0.303765	0.047411	18.0595	0.555366	1922
m-Picoline	0.011804	3.70672	0.576998	0.008324	6.75358	0.456481	1923
m-Terphenyl	5e-06	0.242706	0.971608	0	0.0158326	0.999852	1924
m-Tolualdehyde	0.00299	1.78714	0.834727	0.001126	2.5913	0.928275	1925
m-Toluic_acid	0.00422	2.53278	0.685166	0.001291	4.11255	0.702824	1926
m-Toluidine	0.006183	3.04165	0.810306	0.001844	17.7866	0.919323	1927
m-Toluyl_alcohol	0.003614	2.27163	0.759149	0.000774	2.93087	0.871424	1928
m-Xylene	0.000293	0.272619	0.981422	2.9e-05	0.0116032	0.999909	1929
N-2-Hydroxyethyl-piperazine	0.024217	2.37395	0.285965	0.028212	2.19882	0.162537	1930
Nalidixic_acid	0.003817	2.20041	0.451512	0.004667	3.01242	0.375185	1931
N-Aminoethyl_ethanolamine.coskf	miscible	#VALUE!	miscible	miscible	#VALUE!	miscible	1932
Nandrolone_acetate	3e-05	1.25476	0.699797	4.2e-05	3.5078	0.522641	1933
Nandrolone	0.00019	1.52722	0.594108	0.000201	2.6972	0.381497	1934
Nandrolone_propionate	9e-06	1.04582	0.734063	1e-05	3.13676	0.566267	1935
Naphthacene	9e-06	0.250447	0.972055	0	0.0159353	0.999857	1936
Naphthalene	0.000349	0.372674	0.975114	3.2e-05	0.0210206	0.999874	1937
N-Butyl-1-butanamine	4.4e-05	1.52984	0.77542	9e-06	4.38639	0.667709	1938
n-Butyl_acetate	0.001308	1.41553	0.867087	0.000561	1.73907	0.949147	1939
n-Butyl_acrylate	0.000498	1.0207	0.901006	0.000144	0.861115	0.978762	1940
N-Butylaniline	6.6e-05	0.461161	0.956617	5e-06	0.348655	0.994781	1941
n-Butylbenzene	3.6e-05	0.167626	0.984211	2e-06	0.00609683	0.999928	1942
n-Butylbenzene_hydroperoxide	0.000638	1.69627	0.762098	0.000123	2.14152	0.826761	1943
n-Butyl_benzoate	4.4e-05	0.47508	0.941935	5e-06	0.247752	0.993447	1944
n-Butylcyclohexane	4e-06	0.0487674	0.99304	0	0.000705888	0.999976	1945
n-Butylcyclopentane	8e-06	0.0558245	0.992905	0	0.00084033	0.999975	1946
n-Butyl_ethyl_ether	0.000359	1.02604	0.892545	0.000154	2.53994	0.804707	1947
n-Butyl_formate	0.004202	1.81542	0.850541	0.001409	1.58128	0.969769	1948
n-Butylhydroperoxide	0.014402	2.86612	0.619203	0.006586	3.35418	0.691401	1949
n-Butyl_iodide	0.000425	0.290311	0.981959	4.8e-05	0.012113	0.999911	1950
n-Butyl_isocyanate	0.000504	0.3962	0.975601	5.6e-05	0.0208215	0.999862	1951
n-Butyl_lactate	0.000721	1.60956	0.81239	0.000337	3.12166	0.819156	1952
n-Butyl_mercaptan	0.000975	0.497306	0.971738	0.000118	0.0279932	0.999838	1953
n-Butyl_methacrylate	0.000167	0.767904	0.914503	4.2e-05	0.678902	0.9788	1954
n-Butyl_n-butyrate	0.000146	0.853016	0.898978	4.6e-05	1.17722	0.952685	1955
n-Butyl_nonanoate	1e-06	0.296978	0.943188	0	0.307164	0.981775	1956
n-Butyl_propionate	0.000418	1.11189	0.881865	0.000169	1.57477	0.941856	1957
n-Butyl_stearate	0	0.110265	0.964673	0	0.0862341	0.992112	1958
n-Butyl_valerate	4.6e-05	0.639031	0.916408	1e-05	0.746973	0.969795	1959
n-Decyl_acetate	2e-06	0.394379	0.932242	0	0.416839	0.978149	1960
n-Decylamine	1.4e-05	1.63374	0.716063	2e-06	4.8384	0.603566	1961
n-Decylbenzene	0	0.0682604	0.987718	0	0.00185986	0.999953	1962
n-Decylcyclohexane	0	0.0304385	0.992779	0	0.000421247	0.999979	1963
n-Decylcyclopentane	0	0.032773	0.992724	0	0.000465182	0.999978	1964
n-Decyl_formate	5e-06	0.3706	0.945326	0	0.209013	0.993031	1965
n-Decyl_mercaptan	1e-06	0.117304	0.983907	0	0.00438076	0.999922	1966
n-Dodecanoic_acid	7e-06	0.633832	0.85943	1e-06	0.563926	0.889073	1967
n-Dodecylamine	1e-06	1.18175	0.758879	0	3.88099	0.647808	1968
n-Dodecylbenzene	0	0.0543446	0.988489	0	0.00134922	0.999958	1969
n-Dodecylcyclopentane	0	0.0289822	0.992639	0	0.000404996	0.999979	1970
n-Dodecyl_mercaptan	0	0.0891848	0.985224	0	0.0030259	0.999933	1971
n-Eicosanoic_acid	0	0.323026	0.87813	0	0.231454	0.914359	1972
Neoabietic_acid	5e-06	0.521532	0.866873	0	0.391576	0.933018	1973
Neoheptanoic_acid	0.005219	2.10832	0.685026	0.001849	2.07668	0.791599	1974
Neohexanoic_acid	0.005974	2.24946	0.682481	0.002016	2.48309	0.724017	1975
Neopentanoic_acid	0.015408	2.69153	0.596241	0.007049	3.2668	0.651147	1976
Neopentyl_glycol.coskf	miscible	#VALUE!	miscible	miscible	#VALUE!	miscible	1977
N-Ethyl-2-methylallylamine	0.000745	2.13104	0.803706	0.000207	7.08526	0.728495	1978
N-Ethyl-2-pyrrolidone.coskf	0.026387	2.71786	0.291817	miscible	#VALUE!	miscible	1979
N-Ethylaniline	0.000764	0.98249	0.926896	0.000106	1.03548	0.986198	1980
N-Ethylethanamine	0.003826	3.28867	0.692459	0.001659	7.54216	0.58916	1981
N-Ethylmorpholine	0.005236	3.0274	0.609983	0.00624	4.44984	0.377279	1982
n-Henicosane	0	0.0232619	0.992391	0	0.000321272	0.999979	1983
n-Heptacosane	0	0.0187204	0.992124	0	0.000253401	0.99998	1984
n-Heptadecanoic_acid	0	0.443832	0.857562	0	0.34297	0.893954	1985
n-Heptadecylbenzene	0	0.0375556	0.989252	0	0.000821747	0.999964	1986
n-Heptanoic_acid	0.001129	1.79005	0.748026	0.000317	1.91421	0.78117	1987
n-Heptyl_acetate	5.4e-05	0.70392	0.908112	1.2e-05	0.825994	0.965935	1988
n-Heptylamine	0.000301	2.50571	0.677416	0.000103	6.80777	0.570079	1989
n-Heptylbenzene	1e-06	0.0968258	0.986691	0	0.00293235	0.999945	1990
n-Heptylcyclopentane	0	0.0410854	0.992841	0	0.000596682	0.999977	1991
n-Heptyl_formate	0.00012	0.713955	0.921713	2e-05	0.485538	0.987842	1992
n-Heptyl_mercaptan	3.3e-05	0.209582	0.980468	2e-06	0.00938577	0.999895	1993
n-Hexacosane	0	0.0194386	0.992148	0	0.000264612	0.99998	1994
n-Hexadecanoic_acid	0	0.501057	0.847878	0	0.398917	0.882548	1995
n-Hexadecylbenzene	0	0.0404019	0.989075	0	0.000908724	0.999963	1996
n-Hexadecylcyclopentane	0	0.0238002	0.992457	0	0.000327872	0.999979	1997
n-Hexanoic_acid	0.00394	2.29626	0.700058	0.0013	2.93388	0.724096	1998
n-Hexylbenzene	4e-06	0.112332	0.986129	0	0.00357062	0.999941	1999
n-Hexylcyclopentane	1e-06	0.0450521	0.992868	0	0.000663491	0.999976	2000
n-Hexyl_formate	0.000375	0.956738	0.906259	8.5e-05	0.702917	0.983908	2001
n-Hexyl_iodide	4.3e-05	0.166458	0.98513	3e-06	0.0057917	0.999932	2002
n-Hexylmercaptan	0.000102	0.268085	0.978421	7e-06	0.0128547	0.999881	2003
Niacin	0.048061	2.19203	0.368867	0.014862	3.34717	0.61997	2004
Nicotinamide.coskf	miscible	#VALUE!	miscible	miscible	#VALUE!	miscible	2005
Nicotinonitrile	0.04555	2.6789	0.477473	0.023497	5.92463	0.559719	2006
Niflumic_acid	2.5e-05	1.4027	0.79317	3e-06	9.35962	0.705689	2007
Nitric_acid.coskf	miscible	#VALUE!	miscible	miscible	#VALUE!	miscible	2008
Nitrobenzene	0.003782	1.37673	0.906382	0.000584	0.560688	0.994827	2009
Nitroethane	0.059246	2.55573	0.731287	0.011034	1.46461	0.987621	2010
Nitrogen	0.056275	0.381212	0.990524	0.019236	0.0108872	0.999949	2011
Nitrogen_trichloride	0.001618	0.242879	0.988507	0.000279	0.00778149	0.999944	2012
Nitrogen_trifluoride	0.008598	0.188173	0.993147	0.002227	0.00304863	0.999969	2013
Nitroglycerine	0.000288	1.04666	0.929736	1.1e-05	0.137198	0.999516	2014
Nitromethane	miscible	#VALUE!	miscible	0.028791	1.58184	0.984186	2015
Nitrosyl_chloride	0.041987	1.7312	0.943168	0.009532	0.168332	0.999735	2016
Nitrosyl_fluoride	0.185051	1.97886	0.845089	0.034242	0.37269	0.999269	2017
Nitrous_acid.coskf	miscible	#VALUE!	miscible	miscible	#VALUE!	miscible	2018
Nitrous_oxide	0.07324	1.48818	0.957638	0.020029	0.143179	0.999809	2019
N-Methyl-2-pyrrolidone.coskf	miscible	#VALUE!	miscible	miscible	#VALUE!	miscible	2020
N-Methylacetamide.coskf	miscible	#VALUE!	miscible	miscible	#VALUE!	miscible	2021
N-Methylaniline	0.00232	1.46968	0.912951	0.000395	1.90045	0.988474	2022
N-Methylcyclohexylamine	0.000596	2.27061	0.720507	0.000205	5.65887	0.615463	2023
N-Methylformamide.coskf	miscible	#VALUE!	miscible	miscible	#VALUE!	miscible	2024
N-Methylmethanamine	0.089314	2.4578	0.375614	0.066133	3.175	0.295331	2025
N-Methylpyrrole	0.006846	1.2326	0.937695	0.000892	0.0972494	0.99966	2026
N-Methylpyrrolidine	0.002035	2.363	0.766212	0.000911	4.90556	0.655138	2027
N-Methylthiopyrrolidone	0.004878	1.34359	0.90157	0.00045	0.125966	0.999205	2028
N,N'-Bis(2-hydroxyethyl)ethylenediamine.coskf	miscible	#VALUE!	miscible	miscible	#VALUE!	miscible	2029
N,N'-Di(2-hydroxyethyl)piperazine	0.007493	2.52187	0.365052	0.012458	2.32346	0.165122	2030
N,N-Diethyl-acetamide	0.013895	3.10288	0.344412	0.037744	1.5151	0.099588	2031
N,N-Diethylaniline	6.1e-05	0.241778	0.977298	3e-06	0.0116065	0.999885	2032
N,N-Diethylethanamine	0.000239	1.30661	0.854631	5.8e-05	3.91347	0.763972	2033
N,N-Diethylformamide.coskf	0.037263	2.45524	0.278874	miscible	#VALUE!	miscible	2034
N,N-Diethylhydroxylamine	0.007827	2.36872	0.700686	0.003396	2.64222	0.743052	2035
N,N-Diethylmethylamine	0.001006	2.09229	0.789247	0.000344	5.22488	0.684957	2036
N,N-Dimethylacetamide.coskf	miscible	#VALUE!	miscible	miscible	#VALUE!	miscible	2037
N,N-Dimethylaniline	0.000452	0.453085	0.968383	4.2e-05	0.0337271	0.999792	2038
N,N-Dimethylformamide.coskf	miscible	#VALUE!	miscible	miscible	#VALUE!	miscible	2039
N,N-Dimethylindoaniline	0.000927	2.67338	0.512494	0.001525	4.85251	0.264605	2040
N,N-Dimethylmethanamine	0.01046	3.44241	0.695177	0.006497	6.14528	0.582712	2041
N,N-Dimethyl-n-butylamine	0.000296	1.57347	0.816014	8.6e-05	3.99133	0.709163	2042
N,N'-diphenyl-p-phenylenediamine	1.5e-05	0.948401	0.880171	1e-06	8.33307	0.914572	2043
N,N'-Di-tert-butylethylenediamine	6e-05	2.11023	0.642663	2e-05	6.48472	0.49426	2044
N-Nitrosodiethanolamine.coskf	miscible	#VALUE!	miscible	miscible	#VALUE!	miscible	2045
N-Nitrosodimethylamine	miscible	#VALUE!	miscible	0.203881	1.89446	0.470224	2046
n-Nonadecanoic_acid	0	0.361134	0.869571	0	0.265806	0.904175	2047
n-Nonanoic_acid	0.000137	1.10097	0.814938	2.5e-05	1.16706	0.836091	2048
n-Nonyl_acetate	6e-06	0.458487	0.927574	1e-06	0.496268	0.975974	2049
n-Nonylamine	3.5e-05	1.79779	0.716849	7e-06	5.36684	0.607309	2050
n-Nonylbenzene	0	0.0739083	0.987659	0	0.00203538	0.999952	2051
n-Nonylcyclopentane	0	0.0351371	0.992765	0	0.0005014	0.999978	2052
n-Nonyl_formate	1.4e-05	0.452904	0.938951	1e-06	0.286368	0.99129	2053
n-Nonyl_mercaptan	4e-06	0.140863	0.982905	0	0.00557575	0.999915	2054
n-Octadecanoic_acid	0	0.390552	0.865948	0	0.297908	0.899443	2055
n-Octadecylbenzene	0	0.0359367	0.989171	0	0.000786707	0.999964	2056
n-Octanoic_acid	0.0005	1.41879	0.773721	0.000121	1.32084	0.811724	2057
n-Octyl_acetate	1.8e-05	0.574339	0.917129	3e-06	0.665549	0.969933	2058
n-Octylamine	0.000117	2.22032	0.67964	3.3e-05	6.08538	0.569929	2059
n-Octylbenzene	0	0.0835363	0.987252	0	0.00240206	0.999949	2060
n-Octylcyclopentane	0	0.0378955	0.992802	0	0.000547429	0.999977	2061
n-Octyl_formate	4.1e-05	0.55526	0.932601	5e-06	0.352855	0.990559	2062
n-Octyl_mercaptan	1e-05	0.167742	0.98196	0	0.00699847	0.999907	2063
Nonadecane	0	0.0254682	0.992484	0	0.000354157	0.999979	2064
Nonanal	6.9e-05	0.71696	0.911005	1.5e-05	0.965488	0.959438	2065
Nonane	3e-06	0.0525353	0.992829	0	0.000797185	0.999975	2066
Nonylphenol	1e-06	0.343226	0.932129	0	0.504812	0.944658	2067
Norethindrone_acetate	1.9e-05	1.12451	0.721959	1.4e-05	3.3228	0.606406	2068
Norethindrone	5.6e-05	1.17682	0.696724	2.9e-05	2.46931	0.593729	2069
Norethindrone_enanthate	0	0.651675	0.794938	0	2.23625	0.681162	2070
n-Pentacosane	0	0.0199579	0.99222	0	0.000271017	0.99998	2071
n-Pentadecanoic_acid	1e-06	0.566324	0.839506	0	0.455051	0.877639	2072
n-Pentadecylbenzene	0	0.0431574	0.98893	0	0.000997787	0.999962	2073
n-Pentanoic_acid	0.009928	2.81815	0.615736	0.004944	3.41898	0.6639	2074
n-Pentyl_acetate	0.000505	1.21933	0.87035	0.000203	1.63368	0.941207	2075
n-Pentylbenzene	1.1e-05	0.135842	0.985244	0	0.00461435	0.999935	2076
n-Pentylcyclohexane	1e-06	0.0439674	0.993014	0	0.000628757	0.999977	2077
n-Pentyl_formate	0.001183	1.28901	0.886752	0.000322	0.971856	0.980661	2078
n-Pentyl_n-butyrate	4.9e-05	0.686314	0.907621	1.3e-05	0.903092	0.957698	2079
N-Piperazineethanamine	0.016818	2.96806	0.25173	0.02625	2.35989	0.117276	2080
N-Propyl-1-propanamine	0.000395	2.25954	0.737593	0.000133	5.88804	0.630381	2081
n-Propylbenzene	0.00011	0.212614	0.98287	8e-06	0.00835869	0.999919	2082
n-Propylbenzene_hydroperoxide	0.001639	2.13335	0.72697	0.000386	3.05691	0.792751	2083
n-Propyl_benzoate	0.000122	0.678414	0.924663	2.1e-05	0.467771	0.988396	2084
n-Propylcyclohexane	1.2e-05	0.0550235	0.99304	1e-06	0.000803504	0.999976	2085
n-Propylcyclopentane	2.5e-05	0.0634333	0.992911	2e-06	0.0009688	0.999974	2086
n-Propyl_formate	0.012774	2.4637	0.794915	0.005933	2.32608	0.956183	2087
n-Propyl_iodide	0.00138	0.414859	0.979192	0.000198	0.0195326	0.999893	2088
n-Propyl_isobutyrate	0.000418	1.04572	0.887393	0.000171	1.41774	0.946235	2089
n-Propylmercaptan	0.003517	0.753416	0.964562	0.000512	0.0477651	0.999798	2090
n-Propyl_methacrylate	0.000516	1.02459	0.898233	0.000167	0.967943	0.972552	2091
n-Propyl_n-butyrate	0.000457	1.14013	0.878963	0.00019	1.65906	0.937691	2092
n-Propyl_propionate	0.001352	1.53141	0.852828	0.000729	2.38782	0.914396	2093
n-Tetracosane	0	0.0207592	0.992255	0	0.000283201	0.99998	2094
n-Tetradecanoic_acid	2e-06	0.655765	0.826304	0	0.559294	0.859882	2095
N-Tetradecylamine	0	0.995403	0.763353	0	3.29179	0.647371	2096
n-Tetradecylbenzene	0	0.0471741	0.988683	0	0.00113079	0.99996	2097
n-Tetradecylcyclopentane	0	0.0258634	0.992577	0	0.000356805	0.999979	2098
n-Tricosane	0	0.0215095	0.992302	0	0.000293898	0.99998	2099
n-Tridecylbenzene	0	0.0496132	0.988735	0	0.00119049	0.99996	2100
n-Tridecylcyclopentane	0	0.027548	0.992594	0	0.00038363	0.999979	2101
n-Undecanoic_acid	5.9e-05	1.07294	0.77775	8e-06	0.953498	0.823357	2102
n-Undecylbenzene	0	0.0607796	0.988103	0	0.0015886	0.999955	2103
o-Anisic_acid	0.008094	2.50647	0.594375	0.002601	2.83915	0.743879	2104
o-Anisidine	0.006477	2.44982	0.765419	0.001503	4.12943	0.897137	2105
o-Chloroaniline	0.005044	3.25047	0.829188	0.001888	47.2148	0.872356	2106
o-Chlorobenzoic_acid	0.005646	2.91183	0.659448	0.001725	6.30625	0.669289	2107
o-Chloronitrobenzene	0.001536	1.07228	0.922049	0.000204	0.369732	0.996538	2108
o-Chlorophenol	0.002397	1.6103	0.893274	0.000608	5.50831	0.9244	2109
o-Chlorotoluene	0.000356	0.288138	0.981373	3.7e-05	0.0131891	0.999908	2110
Octadecamethyloctasiloxane	0	0.0448328	0.979966	0	0.0140023	0.999105	2111
Octadecane	0	0.0268072	0.992517	0	0.000374878	0.999979	2112
Octafluoro-2-butene	7.5e-05	0.112353	0.990659	6e-06	0.00289055	0.999959	2113
Octafluorocyclobutane	0.000123	0.115557	0.990679	1.1e-05	0.00309503	0.999958	2114
Octafluoropropane	9.5e-05	0.0545674	0.994361	9e-06	0.000619163	0.99998	2115
Octahydro-pentalene-1-carboxylic_acid.coskf	0.003985	1.96052	0.665329	0.001263	1.94415	0.731171	2116
Octamethylcyclotetrasiloxane	0	0.153046	0.97046	0	0.0591122	0.998154	2117
Octamethyltrisiloxane	0	0.108809	0.980397	0	0.0604072	0.998042	2118
Octanal	0.000228	0.950147	0.895227	6.7e-05	1.42916	0.944074	2119
Octane	7e-06	0.0584899	0.992871	0	0.000890765	0.999975	2120
Octochlorodibenzo-p-dioxin	0	0.0636778	0.987078	0	0.00184413	0.999951	2121
o-Cymene	6.7e-05	0.187155	0.982903	4e-06	0.0073075	0.999919	2122
o-Diethylbenzene	5.5e-05	0.173263	0.983738	3e-06	0.00641475	0.999925	2123
o-Dinitrobenzene	0.002372	1.35065	0.896047	0.000184	0.261176	0.998283	2124
o-Ethylaniline	0.002232	1.94597	0.841775	0.000439	4.56599	0.933522	2125
o-Ethylphenol	0.002899	3.44369	0.716683	0.000998	21.5144	0.656901	2126
o-Ethylstyrene	0.000117	0.267308	0.978375	8e-06	0.0130843	0.999892	2127
o-Ethyltoluene	0.000158	0.232133	0.981717	1.3e-05	0.00967496	0.999911	2128
Oleic_acid	0	0.326132	0.898491	0	0.274737	0.929725	2129
o-Methylstyrene	0.000276	0.33145	0.976843	2.4e-05	0.0170497	0.999883	2130
o-Nitroaniline	0.013861	3.04666	0.615977	0.003945	5.66465	0.789328	2131
o-Nitroanisole	0.003881	1.80033	0.823816	0.000852	1.56115	0.970535	2132
o-Nitrodiphenylamine	0.0001	0.738941	0.913896	9e-06	0.61573	0.986361	2133
o,p-Bisphenol_A	0.000752	3.02966	0.586051	0.00024	16.7094	0.49773	2134
o-Phenylenediamine	0.045598	2.8667	0.463593	0.013554	12.7784	0.673442	2135
o-Picoline	0.009043	3.67079	0.623703	0.006077	7.62671	0.508925	2136
Orthophosphoric_acid.coskf	miscible	#VALUE!	miscible	miscible	#VALUE!	miscible	2137
[truncated: 423 more rows]

## Sheet: Formic Acid
Name	Org_in_Water_Mole_Fraction, 423K	P_FA,423K	Water_in_Org_Mole_Fraction, 423K	Org_in_Water_Mole_Fraction, 298K	P_FA,298K	Water_in_Org_Mole_Fraction, 298 K	#
1,1,1,2,2,3,4,5,5,5-Decafluoropentane.coskf	5.7e-05	0.0413019	0.02348	4e-06	0.00304063	0.000152	1
1,1,1,2,2-Pentafluoropropane	0.001387	0.0663774	0.020145	0.000207	0.00424577	0.000106	2
1,1,1,2,3,3,3-Heptafluoropropane	0.000721	0.0710362	0.029064	9.6e-05	0.00635378	0.000217	3
1,1,1,2,3,3-Hexafluoropropane	0.00385	0.151742	0.062696	0.000562	0.0164484	0.000434	4
1,1,1,2-Tetrachlorodifluoroethane	0.000141	0.027148	0.010048	1.3e-05	0.00113487	4.5e-05	5
1,1,1,2-Tetrachloroethane	0.000833	0.0712315	0.027757	9.7e-05	0.0052328	0.000155	6
1,1,1,2-Tetrafluoroethane	0.0106	0.182849	0.050655	0.002014	0.0163654	0.000275	7
1,1,1,3,3,3-Hexafluoropropane	0.00179	0.103083	0.038922	0.000267	0.00923405	0.000246	8
1,1,1,3,3-Pentachloropropane	0.000141	0.0482484	0.023474	1e-05	0.00324254	0.000126	9
1,1,1,3,3-Pentafluorobutane	0.002259	0.128129	0.052979	0.000247	0.011675	0.000304	10
1,1,1,3,3-Pentafluoropropane	0.004864	0.15668	0.057893	0.00066	0.0148915	0.000336	11
1,1,1-Trichloroethane	0.001256	0.0647245	0.0198	0.000177	0.00409695	0.000102	12
1,1,1-Trichlorofluoroethane	0.001615	0.0891752	0.031734	0.000215	0.00693078	0.000178	13
1,1,1-Trichlorotrifluoroethane	0.00019	0.02652	0.009061	2e-05	0.0010354	4e-05	14
1,1,1-Trifluoroethane	0.010832	0.154489	0.036063	0.002274	0.0122909	0.000186	15
1,1,2,2,3-Pentafluoropropane	0.00587	0.169349	0.064692	0.000829	0.0166303	0.000379	16
1,1,2,2-Tetrabromoethane	0.000471	0.0738581	0.035152	4.3e-05	0.00597046	0.000207	17
1,1,2,2-Tetrachlorodifluoroethane	0.000132	0.0266701	0.009882	1.2e-05	0.00110103	4.4e-05	18
1,1,2,2-Tetrachloroethane	0.001094	0.0886897	0.036925	0.000129	0.00744621	0.000225	19
1,1,2,2-Tetrafluoroethane	0.018742	0.279675	0.091513	0.003798	0.0321234	0.000644	20
1,1,2,2-Tetraphenylethane	0	0.0317437	0.034151	0	0.00239761	0.000181	21
1,1,2-Trichloroethane	0.003297	0.128729	0.046627	0.000411	0.0113399	0.000266	22
1,1,2-Trichlorotrifluoroethane	0.000186	0.0269296	0.009262	1.9e-05	0.00106782	4.1e-05	23
1,1,2-Trifluoroethane	0.033738	0.352909	0.112509	0.005543	0.0382815	0.000684	24
1,1,2-Trimethylcyclopentane	5.8e-05	0.019402	0.00757	4e-06	0.000637729	2.9e-05	25
1,1,2-Triphenylethane	2e-06	0.0332336	0.027395	0	0.00230565	0.000138	26
1,1,3-Trimethylcyclohexane	2.5e-05	0.0175073	0.007585	1e-06	0.000564083	2.8e-05	27
1,1,3-Trimethylcyclopentane	4.3e-05	0.0187103	0.007344	3e-06	0.000593522	2.7e-05	28
1,1-Dibromoethane	0.003453	0.114146	0.035488	0.000476	0.00917069	0.000191	29
1,1-Dichloro-1-fluoroethane	0.00259	0.0843797	0.023889	0.000403	0.00578137	0.000124	30
1,1-Dichloroethane	0.005677	0.132734	0.037693	0.000895	0.0108705	0.000202	31
1,1-Dichloroethene	0.003181	0.074582	0.018338	0.000561	0.00457999	9.6e-05	32
1,1-Dichloropropane	0.001565	0.0845255	0.026845	0.000214	0.00614083	0.000143	33
1,1-Dichlorotetrafluoroethane	0.000255	0.025756	0.008048	2.9e-05	0.000919484	3.4e-05	34
1,1-Diethylcyclohexane	1.2e-05	0.0150677	0.007217	1e-06	0.000454267	2.5e-05	35
1,1-Difluoroethane	0.029946	0.301655	0.076056	0.0057	0.0285138	0.000355	36
1,1-Difluoroethylene	0.011788	0.117973	0.02213	0.002981	0.00798473	0.000119	37
1,1-Dimethoxyethane	0.017752	0.845914	0.382223	0.033882	2.11732	0.68626	38
1,1-Dimethylcyclohexane	6.4e-05	0.0193295	0.007452	5e-06	0.000625227	2.8e-05	39
1,1-Dimethylcyclopentane	0.000122	0.0219693	0.007556	1.1e-05	0.000730343	2.9e-05	40
1,1-Diphenylethane	1.9e-05	0.0389981	0.023246	1e-06	0.00256783	0.000114	41
1,2,3,4,6,7,8-Heptachlorodibenzo-p-dioxin.coskf	0	0.016703	0.014289	0	0.000765239	5.9e-05	42
1,2,3,4,7,8-Hexachlorodibenzo-p-dioxin.coskf	0	0.019359	0.0159	0	0.000963982	7e-05	43
1,2,3,4,7-Pentachlorodibenzo-p-dioxin.coskf	0	0.0216575	0.016749	0	0.00112712	7.5e-05	44
1,2,3,4-Tetrachlorodibenzo-p-dioxin	1e-06	0.0238914	0.016978	0	0.00128372	7.7e-05	45
1,2,3,4-Tetrahydronaphthalene	0.000107	0.0394938	0.016521	8e-06	0.00227087	7.8e-05	46
1,2,3,4-Tetramethylbenzene	6.9e-05	0.0384681	0.017219	5e-06	0.0022765	8.2e-05	47
1,2,3,4-Tetramethylcyclohexane	1.1e-05	0.0153957	0.007385	1e-06	0.000474448	2.6e-05	48
1,2,3,5-Tetraethylbenzene	1e-06	0.0199492	0.012711	0	0.000924911	5.2e-05	49
1,2,3,5-Tetramethylbenzene	5.3e-05	0.0362717	0.016379	3e-06	0.00206031	7.6e-05	50
1,2,3,6-Tetrahydrobenzaldehyde	0.00515	0.411891	0.177357	0.0022	1.27504	0.074374	51
1,2,3,6-Tetrahydrobenzyl_alcohol	0.005465	0.446357	0.295856	0.001617	0.892267	0.228941	52
1,2,3,7-Tetrachlorodibenzo-p-dioxin	1e-06	0.0248914	0.018287	0	0.00139113	8.7e-05	53
1,2,3-Benzenetriol.coskf	miscible	#VALUE!	#VALUE!	miscible	#VALUE!	#VALUE!	54
1,2,3-Butanetriol.coskf	miscible	#VALUE!	#VALUE!	miscible	#VALUE!	#VALUE!	55
1,2,3-Trichlorobenzene	0.000144	0.0409298	0.017625	1.2e-05	0.00236294	8.7e-05	56
1,2,3-Trichloropropane	0.003762	0.170799	0.078896	0.000306	0.0175705	0.000516	57
1,2,3-Triethylbenzene	9e-06	0.026428	0.014387	0	0.0013566	6.3e-05	58
1,2,3-Trimethyl-4-ethylbenzene	3e-05	0.0351359	0.017426	2e-06	0.00209077	8.3e-05	59
1,2,3-Trimethylbenzene	0.000174	0.0464461	0.018701	1.5e-05	0.0028947	9.2e-05	60
1,2,3-Trimethylindene	3.3e-05	0.0362539	0.018498	2e-06	0.00217074	8.8e-05	61
1,2,4,5-Tetraisopropylbenzene	0	0.0174715	0.014456	0	0.000861609	6e-05	62
1,2,4,5-Tetramethylbenzene	4.6e-05	0.0345273	0.015543	3e-06	0.00190005	7.1e-05	63
1,2,4-Butanetriol.coskf	miscible	#VALUE!	#VALUE!	miscible	#VALUE!	#VALUE!	64
1,2,4-Trichlorobenzene	0.000132	0.0423798	0.018569	1.1e-05	0.00253744	9.5e-05	65
1,2,4-Trichlorodibenzo-p-dioxin	3e-06	0.0281748	0.018985	0	0.00166308	9.3e-05	66
1,2,4-Triethylbenzene	6e-06	0.0251605	0.013708	0	0.00125108	5.9e-05	67
1,2,4-Trimethyl-3-ethylbenzene	3.4e-05	0.0359914	0.017808	2e-06	0.00218089	8.6e-05	68
1,2,4-Trimethyl-5-ethylbenzene	2.6e-05	0.0348771	0.017419	1e-06	0.00207191	8.3e-05	69
1,2,4-Trimethylbenzene	0.000131	0.0433	0.017625	1e-05	0.00258699	8.5e-05	70
1,2-Benzenedicarboxylic_acid,_heptyl,_nonyl_ester.coskf	0	0.0443824	0.053523	0	0.0625045	0.007507	71
1,2-Benzene_dicarboxylic_acid,_heptyl,_undecyl_ester.coskf	0	0.0334646	0.043052	0	0.0390585	0.004873	72
1,2-Benzenediol	0.078778	0.826169	0.740788	0.055492	0.885478	0.788334	73
1,2-Butadiene	0.005121	0.108655	0.024777	0.000909	0.00781779	0.000128	74
1,2-Butanediol.coskf	miscible	#VALUE!	#VALUE!	miscible	#VALUE!	#VALUE!	75
1,2-dibromododecane	0	0.0234574	0.018521	0	0.00132805	8.7e-05	76
1,2-Dibromoethane	0.004145	0.138038	0.0448	0.000523	0.0119355	0.000242	77
1,2-Dibromotetrafluoroethane	0.000191	0.0286748	0.009946	2e-05	0.00121641	4.7e-05	78
1,2-Dichloro-1,1,2-trifluoroethane	0.00123	0.0777625	0.028255	0.000177	0.00619791	0.000183	79
1,2-Dichloro-4-nitrobenzene	0.000413	0.115576	0.055397	4.2e-05	0.0491475	0.00167	80
1,2-Dichlorobenzene	0.000396	0.053084	0.020144	4.2e-05	0.00335476	0.000104	81
1,2-Dichlorobutane	0.001221	0.101345	0.039052	0.000125	0.0085994	0.000217	82
1,2-Dichloroethane	0.007308	0.168692	0.050216	0.001085	0.0149853	0.000267	83
1,2-Dichlorohexafluorocyclobutane	4.7e-05	0.0214618	0.008985	3e-06	0.000804524	3.7e-05	84
1,2-Dichloropropane	0.004312	0.153574	0.053907	0.000481	0.0141409	0.000294	85
1,2-Dichlorotetrafluoroethane	0.000237	0.0253803	0.00795	2.7e-05	0.000893369	3.3e-05	86
1,2-Diethoxyethane	0.000729	0.367744	0.163455	0.00063	2.31591	0.257107	87
1,2-Difluorobenzene	0.001527	0.0820437	0.027144	0.00021	0.00593524	0.000144	88
1,2-Difluoroethane	0.035253	0.351311	0.094749	0.005852	0.0355019	0.000463	89
1,2-Dimethoxyethane	0.011418	0.739312	0.309567	0.019243	2.61475	0.560205	90
1,2-Dimethoxypropane	0.005349	0.642606	0.28538	0.007201	2.86281	0.528617	91
1,2-Dimethyl-3-hydroxy-4-pyridone.coskf	miscible	#VALUE!	#VALUE!	miscible	#VALUE!	#VALUE!	92
1,2-Dimethyl-3-propylbenzene	2.5e-05	0.0346216	0.017347	1e-06	0.00203555	8.2e-05	93
1,2-Diphenylethane	1.7e-05	0.0417642	0.024833	1e-06	0.002853	0.000124	94
1,2-Epoxy-2-methylpropane	0.02763	0.830612	0.3349	0.029626	2.61788	0.455172	95
1,2-Epoxy-3-phenoxypropane	0.001187	0.219913	0.117611	0.000178	0.286061	0.013592	96
1,2-Ethanediamine.coskf	miscible	#VALUE!	#VALUE!	miscible	#VALUE!	#VALUE!	97
1,2-Ethanediol.coskf	miscible	#VALUE!	#VALUE!	miscible	#VALUE!	#VALUE!	98
1,2-ethane_diphosphonic_acid	miscible	#VALUE!	#VALUE!	0.066214	0.898514	0.85386	99
1,2-Ethanedithiol	0.007267	0.216419	0.076707	0.000813	0.0224598	0.000454	100
1,2-Hexadiene	0.000406	0.0534227	0.016925	4.6e-05	0.00315751	8.3e-05	101
1,2-Pentadiene	0.001398	0.0726944	0.019411	0.000205	0.00470942	0.0001	102
1,2-Propadiene	0.02169	0.200979	0.040471	0.005149	0.0166908	0.000202	103
1,2-Propanediamine.coskf	miscible	#VALUE!	#VALUE!	miscible	#VALUE!	#VALUE!	104
1,2-Propylene_glycol.coskf	miscible	#VALUE!	#VALUE!	miscible	#VALUE!	#VALUE!	105
1,3,5,7-Cyclooctatetraene	0.001108	0.0875522	0.032169	0.000122	0.00702055	0.000172	106
1,3,5-Trichlorobenzene	9.6e-05	0.0385358	0.017071	7e-06	0.00219461	8.6e-05	107
1,3,5-Triethylbenzene	4e-06	0.0237353	0.012859	0	0.00113039	5.4e-05	108
1,3,5-Triisopropylbenzene	0	0.0207943	0.014387	0	0.00103594	6.1e-05	109
1,3,5-Trinitrobenzene	0.001312	0.188887	0.121957	5.8e-05	0.0441963	0.001991	110
1,3,5-Tri-tert-butylbenzene	0	0.0167548	0.013703	0	0.000783776	5.5e-05	111
1,3,6,8-Tetrachlorodibenzo-p-dioxin	1e-06	0.0249308	0.01851	0	0.00140188	8.9e-05	112
1,3-Benzenediol.coskf	miscible	#VALUE!	#VALUE!	miscible	#VALUE!	#VALUE!	113
1,3-Butadiene	0.006055	0.116945	0.027139	0.001095	0.00866232	0.000139	114
1,3-Butanediol.coskf	miscible	#VALUE!	#VALUE!	miscible	#VALUE!	#VALUE!	115
1,3-Cyclohexadiene	0.001592	0.0753352	0.020867	0.00024	0.00514709	0.000107	116
1,3-dichloro-2-propanol	0.009467	0.403386	0.225228	0.00263	0.496576	0.094991	117
1,3-Dichlorobenzene	0.000336	0.0522361	0.020188	3.4e-05	0.00330068	0.000105	118
1,3-Dichlorohexafluoropropane	5e-05	0.0190032	0.007557	4e-06	0.000622498	3e-05	119
1,3-Dichloropropane	0.00429	0.162246	0.057939	0.000448	0.0151284	0.000317	120
1,3-Dichloro-trans-2-butene	0.000997	0.0870899	0.031047	0.000109	0.00679113	0.000168	121
1,3-Difluorobenzene	0.001584	0.0859261	0.028902	0.000217	0.00640944	0.000157	122
1,3-Dimethyl-2-imidazolidinone.coskf	0.05777	1.10732	0.766127	miscible	#VALUE!	#VALUE!	123
1,3-Dimethyl-5-nitrobenzene	0.000378	0.134874	0.06219	4.7e-05	0.100739	0.003903	124
1,3-Dimethyladamantane	9e-06	0.0144299	0.007339	0	0.000441624	2.6e-05	125
1,3-Dimethyl_urea.coskf	miscible	#VALUE!	#VALUE!	miscible	#VALUE!	#VALUE!	126
1,3-Dimethylxanthine.coskf	miscible	#VALUE!	#VALUE!	miscible	#VALUE!	#VALUE!	127
1,3-Dioxane.coskf	miscible	#VALUE!	#VALUE!	miscible	#VALUE!	#VALUE!	128
1,3-Dioxolane.coskf	miscible	#VALUE!	#VALUE!	miscible	#VALUE!	#VALUE!	129
1,3-Diphenyltriazene	7.3e-05	0.109637	0.108649	6e-06	0.0801534	0.047867	130
1,3-Di-tert-butyl_glycerin	4.3e-05	0.247958	0.17702	2.7e-05	1.86809	0.318095	131
1,3-Propanediamine.coskf	miscible	#VALUE!	#VALUE!	miscible	#VALUE!	#VALUE!	132
1,3-Propylene_glycol.coskf	miscible	#VALUE!	#VALUE!	miscible	#VALUE!	#VALUE!	133
1,3-Propylene_oxide.coskf	miscible	#VALUE!	#VALUE!	miscible	#VALUE!	#VALUE!	134
1,4-Benzenedicarboxylic_acid,_2-hydroxyethyl_methyl_ester.coskf	0.000896	0.352549	0.300761	0.000393	0.805206	0.185333	135
1,4-Benzenedicarboxylic_acid,bis(2,3-dihydroxypropyl)ester.coskf	0.000866	0.406627	0.498984	0.000537	0.977003	0.463469	136
1,4-Bis(3-aminopropyl)piperazine	0.001086	1.13108	0.68065	0.001424	3.72452	0.822441	137
1,4-Butanediisocyanate	0.000272	0.0950489	0.042195	1.8e-05	0.00917766	0.000255	138
1,4-Butanediol.coskf	miscible	#VALUE!	#VALUE!	miscible	#VALUE!	#VALUE!	139
1,4-Cyclohexadiene	0.001486	0.0728051	0.020022	0.000221	0.00489639	0.000103	140
1,4-Cyclohexanedicarboxylic_acid	0.097843	0.918269	0.843021	0.03536	0.795408	0.730722	141
1,4-Cyclohexanedimethanol	0.008145	0.627774	0.536967	0.00553	1.30151	0.587064	142
1,4-Dibromobenzene	0.000262	0.0545734	0.023252	2.4e-05	0.0036419	0.000121	143
1,4-Dichlorobenzene	0.000386	0.0568374	0.022364	4e-05	0.00375279	0.000117	144
1,4-Dichlorobutane	0.001239	0.116625	0.045031	0.000114	0.0104136	0.000248	145
1,4-Dichloro-cis-2-butene	0.001979	0.13223	0.053108	0.000202	0.0120541	0.000303	146
1,4-Dichloro-trans-2-butene	0.001313	0.113996	0.043508	0.000127	0.0099036	0.000242	147
1,4-Dicyano-2-butene	0.050163	0.796946	0.536284	0.008773	0.994535	0.078175	148
1,4-Difluorobenzene	0.001864	0.0953367	0.032542	0.000256	0.00743507	0.000178	149
1,4-Dioxane.coskf	miscible	#VALUE!	#VALUE!	miscible	#VALUE!	#VALUE!	150
1,4-Di-tert-butylbenzene	2e-06	0.0217603	0.01391	0	0.00104909	5.8e-05	151
1,4-Hexadiene	0.000564	0.0652943	0.020465	6.4e-05	0.00439585	0.000105	152
1,4-Pentadiene	0.001768	0.0843376	0.022926	0.000265	0.0059137	0.000118	153
1,5,9-Cyclododecatriene	1.7e-05	0.0299852	0.016347	1e-06	0.00170404	7.6e-05	154
1,5-Cyclooctadiene	0.00029	0.0506925	0.018407	2.9e-05	0.00329896	9.3e-05	155
1,5-Dichloropentane	0.000409	0.089154	0.037636	3.1e-05	0.00759597	0.000207	156
1,5-Hexadiene	0.000611	0.0657565	0.020668	7e-05	0.00443133	0.000106	157
1,5-Naphthalene_diisocyanate	2.1e-05	0.0440271	0.026284	1e-06	0.00311244	0.000139	158
1,5-Pentanediamine	0.018008	1.31325	0.735648	0.019995	2.41322	0.848085	159
1,5-Pentanediol.coskf	miscible	#VALUE!	#VALUE!	miscible	#VALUE!	#VALUE!	160
1,6-Hexamethylene_diisocyanate	3.1e-05	0.0612656	0.032168	1e-06	0.00546453	0.000193	161
1,6-Hexanediol	0.023271	0.854004	0.686446	0.018175	1.41724	0.747581	162
1,6-Hexanediol_diacrylate	3.1e-05	0.19476	0.147097	9e-06	0.470853	0.045303	163
1,9-Decadiene	6e-06	0.0292045	0.014751	0	0.00154862	6.6e-05	164
1-Acetyl-2-naphthol	0.000253	0.144785	0.083048	3.5e-05	0.215947	0.011384	165
1-Amino-2-propanol.coskf	miscible	#VALUE!	#VALUE!	miscible	#VALUE!	#VALUE!	166
1-Bromobutane	0.000894	0.0734712	0.022804	0.00011	0.00516142	0.000119	167
1-Bromododecane	0	0.0181456	0.012629	0	0.000814277	5.1e-05	168
1-Bromoheptane	2.9e-05	0.0362999	0.016395	2e-06	0.00207117	7.7e-05	169
1-Bromonaphthalene	9.4e-05	0.0423788	0.020302	6e-06	0.00262339	0.000101	170
1-Bromopropane	0.0029	0.102433	0.027478	0.000434	0.00781541	0.000145	171
1-Butanamine	0.008855	1.22659	0.459982	0.005889	4.95155	0.558027	172
1-Butanol	0.01941	0.736913	0.440326	0.009224	1.42331	0.424188	173
1-Buten-3-yne	0.015439	0.227353	0.062432	0.002818	0.0210256	0.000331	174
1-Butene	0.002486	0.0714988	0.016161	0.000431	0.00429209	8e-05	175
1-Butyne	0.009745	0.199951	0.052908	0.001675	0.0184905	0.000288	176
1-Chloro-1,1-difluoroethane	0.005228	0.109705	0.028177	0.00091	0.00808074	0.000148	177
1-Chloro-2,4-dinitrobenzene	0.001062	0.170207	0.096538	7.7e-05	0.0535226	0.002117	178
1-Chloro-2-propanol	0.028685	0.754237	0.386373	0.014818	1.90255	0.343565	179
1-Chloro-3-propanol	0.044305	0.727401	0.491269	0.013709	0.86411	0.27948	180
1-Chlorobutane	0.001076	0.0761977	0.022554	0.000141	0.00536005	0.000117	181
1-Chlorodibenzo-p-dioxin	2.4e-05	0.0399293	0.023182	1e-06	0.00277925	0.000123	182
1-Chlorohexane	9.6e-05	0.0443121	0.01723	7e-06	0.00266762	8.4e-05	183
1-Chloronaphthalene	0.000116	0.0435125	0.020181	8e-06	0.00268896	0.0001	184
1-Chlorooctane	9e-06	0.030346	0.014785	0	0.00161633	6.7e-05	185
1-Chloropentane	0.000322	0.0569877	0.019329	3.3e-05	0.0037204	9.9e-05	186
1-Chloropropane	0.003797	0.110059	0.027846	0.000603	0.00849724	0.000147	187
1-Chlorotetradecane	0	0.0152636	0.011805	0	0.000640252	4.5e-05	188
1-cis-2-trans-3-Trimethylcyclopentane.coskf	4.1e-05	0.0182996	0.00725	3e-06	0.000575822	2.7e-05	189
1-cis-2-trans-4-Trimethylcyclopentane.coskf	3.8e-05	0.0181268	0.007171	3e-06	0.000561694	2.6e-05	190
1-Decanol	2.5e-05	0.180023	0.145661	3e-06	0.516848	0.129672	191
1-Decene	2e-06	0.0205094	0.010302	0	0.00085476	4.2e-05	192
1-Decyne	1e-05	0.0367897	0.019488	0	0.00232214	0.000102	193
1-Dodecanol	3e-06	0.133903	0.121113	0	0.384361	0.101721	194
1-Dodecene	0	0.0164076	0.009818	0	0.000632598	3.7e-05	195
1-Eicosanol	0	0.0597239	0.07534	0	0.167711	0.051901	196
1-Eicosene	0	0.00946571	0.009299	0	0.000308862	3e-05	197
1-Ethoxy-2-propanol	0.012847	0.6937	0.455403	0.009739	1.68758	0.542049	198
1-Ethyl-2-isopropylbenzene	2.3e-05	0.0312084	0.015546	1e-06	0.00168959	7e-05	199
1-Ethylcyclohexene	7.2e-05	0.0275494	0.010108	6e-06	0.00122059	4.5e-05	200
1-Ethylnaphthalene	4.8e-05	0.0386044	0.019244	3e-06	0.00232945	9.2e-05	201
1-Ethyltetralin	2.2e-05	0.0316013	0.01627	1e-06	0.00177137	7.5e-05	202
1-Heptadecanol	0	0.0761463	0.086496	0	0.21454	0.063971	203
1-Heptadecene	0	0.0111441	0.009375	0	0.000379588	3.1e-05	204
1-Heptanol	0.000568	0.309152	0.213253	0.000137	0.758599	0.195469	205
1-Heptene	7.3e-05	0.032751	0.011919	6e-06	0.0015807	5.3e-05	206
1-Heptyne	0.000275	0.0681053	0.026566	2.4e-05	0.00510188	0.00015	207
1-Hexadecanol	0	0.0823965	0.084641	0	0.281664	0.071079	208
1-Hexadecene	0	0.0119694	0.009462	0	0.00041987	3.3e-05	209
1-Hexanamine	0.00107	0.96063	0.379324	0.000462	5.42522	0.485352	210
1-Hexanol	0.001852	0.419661	0.263909	0.000646	1.06107	0.258293	211
1-Hexene	0.000237	0.0409931	0.012988	2.5e-05	0.00212067	6e-05	212
1-Hexyne	0.00088	0.0903731	0.030947	9.7e-05	0.00724703	0.000178	213
1H-Imidazole.coskf	miscible	#VALUE!	#VALUE!	miscible	#VALUE!	#VALUE!	214
1-Isopropoxy-2-propanol	0.002744	0.606143	0.314397	0.002543	2.52168	0.508288	215
1-Methoxy-2-propanol_propanoate	0.001549	0.461477	0.247478	0.001792	2.50421	0.283744	216
1-Methyl-1-ethylcyclopentane	4.4e-05	0.0184105	0.007241	3e-06	0.000579706	2.7e-05	217
1-Methyl-2-nitrobenzene	0.001726	0.218115	0.094721	0.000319	0.254877	0.009526	218
1-Methyl-2-n-propylbenzene	5.5e-05	0.0373203	0.016995	3e-06	0.00215656	8e-05	219
1-Methyl-3-hydroxy-5-isopropyl_benzene.coskf	0.000531	0.167499	0.226269	0.000116	0.104756	0.244804	220
1-Methyl-3-hydroxy-6-isopropyl_benzene.coskf	0.00081	0.182278	0.239483	0.000184	0.116064	0.249552	221
1-Methyl-3-(methylethoxy)benzene	8.4e-05	0.0796345	0.038606	7e-06	0.0758979	0.002744	222
1-Methyl-3-nitrobenzene	0.001262	0.186964	0.080406	0.000197	0.161626	0.005993	223
1-Methyl-3-n-propylbenzene	3.5e-05	0.0338793	0.015411	2e-06	0.00183672	7e-05	224
1-Methyl-4-n-propylbenzene	3.2e-05	0.0331916	0.01514	2e-06	0.00177316	6.8e-05	225
1-Methyl-4-vinylcyclohexene	7.9e-05	0.0374796	0.015571	6e-06	0.00211627	7.3e-05	226
1-Methylcyclohexanol	0.003556	0.495683	0.304806	0.001377	1.55739	0.361691	227
1-Methylcyclohexene	0.0002	0.0329077	0.010599	2.1e-05	0.00152093	4.8e-05	228
1-Methylcyclopentene	0.000517	0.0412023	0.011582	6.7e-05	0.00202018	5.4e-05	229
1-Methylindan	0.000109	0.0420887	0.017965	8e-06	0.00254697	8.7e-05	230
1-Methylindene	0.000207	0.0530114	0.022561	1.7e-05	0.00354706	0.000113	231
1-Methylnaphthalene	0.000136	0.0477891	0.021887	1e-05	0.0030984	0.000108	232
1-Methylpiperidine	0.000847	0.601549	0.197204	0.00029	4.50138	0.304669	233
1-Methyltetralin	5.9e-05	0.0370031	0.017268	4e-06	0.00217351	8.2e-05	234
1-Methylvinyl_acetate	0.006919	0.405868	0.166112	0.002345	0.727019	0.031887	235
1-n-Butylnaphthalene	6e-06	0.0285421	0.017114	0	0.00156234	7.7e-05	236
1-n-Decylnaphthalene	0	0.0150593	0.013338	0	0.000650561	5.1e-05	237
1-n-Hexyl-1,2,3,4-tetrahydronaphthalene.coskf	0	0.0188749	0.01333	0	0.000877395	5.4e-05	238
1-n-Hexylnaphthalene	1e-06	0.0220246	0.01525	0	0.00109289	6.4e-05	239
1-Nitrobutane	0.005152	0.280024	0.111286	0.000859	0.187871	0.006147	240
1-Nitropropane	0.013739	0.390715	0.141446	0.003093	0.282683	0.007747	241
1-n-Nonylnaphthalene	0	0.0163071	0.013688	0	0.000724032	5.3e-05	242
1-Nonadecanol	0	0.0624463	0.07699	0	0.167058	0.053142	243
1-Nonadecene	0	0.00993651	0.009307	0	0.000327577	3e-05	244
1-Nonanol	6.8e-05	0.212445	0.162345	1e-05	0.598435	0.148213	245
1-Nonene	7e-06	0.0234005	0.010681	0	0.00101836	4.5e-05	246
1-Nonyne	3.1e-05	0.0439999	0.021197	1e-06	0.0029283	0.000114	247
1-n-Pentylnaphthalene	2e-06	0.0248866	0.016021	0	0.0012946	7e-05	248
1-n-Propylnaphthalene	1.8e-05	0.0330832	0.018212	1e-06	0.00190867	8.5e-05	249
1-Octadecanol	0	0.069821	0.082276	0	0.198019	0.059748	250
1-Octadecene	0	0.010511	0.009334	0	0.000353072	3.1e-05	251
1-Octanol	0.000186	0.248994	0.183261	3.5e-05	0.634859	0.163815	252
1-Octene	2.3e-05	0.0273698	0.011218	1e-06	0.0012547	4.9e-05	253
1-Octyne	8.7e-05	0.0534918	0.023379	6e-06	0.00375954	0.000129	254
1-Pentadecanol	0	0.0927554	0.09743	0	0.258985	0.075105	255
1-Pentadecene	0	0.0127511	0.009492	0	0.000453366	3.3e-05	256
1-Pentanamine	0.002843	1.05881	0.39603	0.001341	5.43814	0.499427	257
1-Pentanol	0.005812	0.523391	0.318821	0.001973	1.15631	0.303162	258
1-Pentene-3-yne	0.003753	0.128118	0.035668	0.000522	0.0105777	0.000189	259
1-Pentene-4-yne	0.006571	0.185636	0.059071	0.000855	0.0174636	0.000327	260
1-Pentene	0.000716	0.0513864	0.014018	9.6e-05	0.00281255	6.7e-05	261
1-Pentyne	0.00297	0.12735	0.038253	0.000392	0.0109378	0.000218	262
1-Phenyl-1-propanol	0.000948	0.237905	0.171507	0.000179	0.33861	0.092868	263
1-Phenyl-2-propanol	0.001263	0.394607	0.220464	0.000487	1.75637	0.2631	264
1-Phenylethanone	0.004819	0.451601	0.213783	0.002304	1.89514	0.152995	265
1-Phenylindene	3e-05	0.0469458	0.029079	1e-06	0.00343909	0.000152	266
1-Phenylnaphthalene	1.1e-05	0.0356043	0.022684	0	0.00226866	0.00011	267
1-Propanamine	0.032371	1.32295	0.565889	0.022923	3.60301	0.652967	268
1-Propanol	0.121124	0.973085	0.698773	0.055009	1.39286	0.633611	269
1-Propoxypropane	0.000372	0.296731	0.112764	0.000168	2.2283	0.215133	270
1-Propyl_acrylate	0.001565	0.291604	0.124238	0.000598	0.580696	0.029407	271
1-tert-Butoxy-2-[2-(hydroxy)propoxy]propane.coskf	0.000152	0.42223	0.28304	0.000134	2.71416	0.514936	272
1-Tetradecanol	0	0.103865	0.103699	0	0.297366	0.08289	273
1-Tetradecene	0	0.0138145	0.009605	0	0.000506772	3.5e-05	274
1-trans-3,5-Trimethylcyclohexane	2.2e-05	0.0170853	0.007476	1e-06	0.000540259	2.7e-05	275
1-Tridecanoic_acid	7e-06	0.112994	0.184067	1e-06	0.0782607	0.141301	276
1-Tridecanol	1e-06	0.115611	0.11009	0	0.325846	0.089035	277
1-Tridecene	0	0.0150261	0.009711	0	0.00056554	3.6e-05	278
1-Undecanol	8e-06	0.153667	0.131884	1e-06	0.439013	0.113696	279
1-Undecene	1e-06	0.018283	0.010046	0	0.000736494	4e-05	280
2-2-2-Butoxyethoxy-ethoxy-ethanol	0.000136	0.316767	0.291871	0.000106	1.22634	0.346014	281
2,2',2''-Nitrilotrisacetonitrile	0.057431	0.683768	0.622158	0.001879	0.349547	0.043395	282
2,2,2-Trifluoroethanol	miscible	#VALUE!	#VALUE!	0.140041	0.921928	0.725056	283
2,2',3,3',4,4',5,5',6-Nonachlorobiphenyl.coskf	0	0.0137189	0.012746	0	0.000570427	5e-05	284
2,2',3,3',4,4',5,5'-Octachlorobiphenyl.coskf	0	0.0154674	0.013937	0	0.000689119	5.7e-05	285
2,2',3,3',4,4',5,6,6'-Nonachlorobiphenyl.coskf	0	0.0130685	0.012171	0	0.000526403	4.7e-05	286
2,2',3,3',4,4',5,6-Octachlorobiphenyl.coskf	0	0.0157965	0.014102	0	0.000711253	5.8e-05	287
2,2',3,3',4,4',5,6'-Octachlorobiphenyl.coskf	0	0.0153696	0.013938	0	0.000687254	5.8e-05	288
2,2',3,3',4,4',5-Heptachlorobiphenyl.coskf	0	0.0176893	0.015226	0	0.00084532	6.5e-05	289
2,2',3,3',4,4',6,6'-Octachlorobiphenyl.coskf	0	0.0149809	0.013595	0	0.000658757	5.6e-05	290
2,2',3,3',4,4',6-Heptachlorobiphenyl.coskf	0	0.0177966	0.015398	0	0.0008599	6.7e-05	291
2,2',3,3',4,4'-Hexachlorobiphenyl	0	0.0204433	0.016711	0	0.00105157	7.5e-05	292
2,2',3,3',4,5,5',6,6'-Nonachlorobiphenyl.coskf	0	0.0134587	0.012448	0	0.0005531	4.9e-05	293
2,2',3,3',4,5,5',6-Octachlorobiphenyl.coskf	0	0.015544	0.014052	0	0.000697427	5.8e-05	294
2,2',3,3',4,5,5',6'-Octachlorobiphenyl.coskf	0	0.0157498	0.014304	0	0.000716878	6e-05	295
2,2',3,3',4,5,5'-Heptachlorobiphenyl.coskf	0	0.0175705	0.015274	0	0.000842508	6.6e-05	296
2,2',3,3',4,5,6,6'-Octachlorobiphenyl.coskf	0	0.0157032	0.013991	0	0.000705755	5.8e-05	297
2,2',3,3',4,5',6,6'-Octachlorobiphenyl.coskf	0	0.0154123	0.013924	0	0.000690389	5.8e-05	298
2,2',3,3',4,5,6-Heptachlorobiphenyl	0	0.017622	0.014976	0	0.000832927	6.3e-05	299
2,2',3,3',4,5,6'-Heptachlorobiphenyl.coskf	0	0.018052	0.015647	0	0.000883141	6.9e-05	300
2,2',3,3',4,5',6-Heptachlorobiphenyl.coskf	0	0.0177066	0.015433	0	0.000858584	6.8e-05	301
2,2',3,3',4,5',6'-Heptachlorobiphenyl.coskf	0	0.0182444	0.015788	0	0.000899013	7e-05	302
2,2',3,3',4,5-Hexachlorobiphenyl	0	0.0199774	0.016213	0	0.00100799	7.2e-05	303
2,2',3,3',4,5'-Hexachlorobiphenyl	0	0.020308	0.016744	0	0.00104749	7.6e-05	304
2,2',3,3',4,6,6'-Heptachlorobiphenyl.coskf	0	0.017809	0.015456	0	0.000865157	6.8e-05	305
2,2',3,3',4,6-Hexachlorobiphenyl	0	0.0203577	0.016599	0	0.00104202	7.4e-05	306
2,2',3,3',4,6'-Hexachlorobiphenyl	1e-06	0.0211867	0.017438	0	0.00112236	8e-05	307
2,2',3,3',4-Pentachlorobiphenyl	1e-06	0.0237173	0.018162	0	0.0013028	8.5e-05	308
2,2',3,3',5,5',6,6'-Octachlorobiphenyl.coskf	0	0.015461	0.014009	0	0.000696704	5.9e-05	309
2,2',3,3',5,5',6-Heptachlorobiphenyl.coskf	0	0.0180055	0.015743	0	0.000885232	7e-05	310
2,2',3,3',5,5'-Hexachlorobiphenyl	0	0.0201485	0.016781	0	0.00104231	7.7e-05	311
2,2',3,3',5,6,6'-Heptachlorobiphenyl.coskf	0	0.0183173	0.015826	0	0.000904618	7e-05	312
2,2',3,3',5,6-Hexachlorobiphenyl	0	0.0206158	0.016889	0	0.0010678	7.6e-05	313
2,2',3,3',5,6'-Hexachlorobiphenyl	0	0.0208994	0.017349	0	0.00110761	8.1e-05	314
2,2',3,3',5-Pentachlorobiphenyl	1e-06	0.0232144	0.017951	0	0.00126511	8.4e-05	315
2,2',3,3',6,6'-Hexachlorobiphenyl	1e-06	0.0214151	0.017669	0	0.00114673	8.2e-05	316
2,2',3,3',6-Pentachlorobiphenyl	2e-06	0.0244479	0.018864	0	0.00137734	9e-05	317
2,2',3,3'-Tetrachlorobiphenyl	3e-06	0.0274501	0.019648	0	0.00160012	9.5e-05	318
2,2,3,3-Tetramethylbutane	6.3e-05	0.0205344	0.008377	5e-06	0.000729888	3.3e-05	319
2,2,3,3-Tetramethylhexane	8e-06	0.0158181	0.007989	0	0.00051741	2.9e-05	320
2,2,3,3-Tetramethylpentane	2.4e-05	0.017552	0.008019	1e-06	0.000588065	3e-05	321
2,2',3,4,4',5,5',6-Octachlorobiphenyl.coskf	0	0.0157201	0.014256	0	0.000714435	6e-05	322
2,2',3,4,4',5,5'-Heptachlorobiphenyl.coskf	0	0.0178009	0.015461	0	0.000863462	6.8e-05	323
2,2',3,4,4',5,6,6'-Octachlorobiphenyl.coskf	0	0.0149689	0.013424	0	0.000653111	5.5e-05	324
2,2',3,4,4',5,6-Heptachlorobiphenyl	0	0.0177315	0.015258	0	0.000847471	6.5e-05	325
2,2',3,4,4',5,6'-Heptachlorobiphenyl.coskf	0	0.0172962	0.015106	0	0.000825646	6.6e-05	326
2,2',3,4,4',5',6-Heptachlorobiphenyl.coskf	0	0.017852	0.01561	0	0.000871852	6.9e-05	327
2,2',3,4,4',5-Hexachlorobiphenyl	0	0.0200138	0.016407	0	0.00101532	7.3e-05	328
2,2',3,4,4',5'-Hexachlorobiphenyl	0	0.0205608	0.016949	0	0.0010685	7.7e-05	329
2,2',3,4,4',6,6'-Heptachlorobiphenyl.coskf	0	0.0171692	0.01497	0	0.000815198	6.5e-05	330
2,2',3,4,4',6-Hexachlorobiphenyl	0	0.0205014	0.016926	0	0.00106415	7.7e-05	331
2,2',3,4,4',6'-Hexachlorobiphenyl	0	0.0202217	0.016731	0	0.0010426	7.6e-05	332
2,2',3,4,4'-Pentachlorobiphenyl	1e-06	0.0234818	0.018183	0	0.00128768	8.5e-05	333
2,2',3,4,5,5',6-Heptachlorobiphenyl	0	0.018113	0.015624	0	0.000882312	6.8e-05	334
2,2',3,4',5,5',6-Heptachlorobiphenyl.coskf	0	0.01826	0.015994	0	0.000908772	7.2e-05	335
2,2',3,4,5,5'-Hexachlorobiphenyl	0	0.0205425	0.016907	0	0.00106595	7.7e-05	336
2,2',3,4',5,5'-Hexachlorobiphenyl	0	0.0203815	0.016976	0	0.00106169	7.8e-05	337
2,2',3,4,5,6,6'-Heptachlorobiphenyl	0	0.0174795	0.014783	0	0.000819574	6.2e-05	338
2,2',3,4',5,6,6'-Heptachlorobiphenyl.coskf	0	0.0174492	0.015196	0	0.000839588	6.7e-05	339
2,2',3,4,5,6-Hexachlorobiphenyl	1e-06	0.0198259	0.015851	0	0.000981357	6.8e-05	340
2,2',3,4,5,6'-Hexachlorobiphenyl	0	0.0201894	0.016492	0	0.00102986	7.4e-05	341
2,2',3,4,5',6-Hexachlorobiphenyl	0	0.0208405	0.017226	0	0.00109511	7.9e-05	342
2,2',3,4',5,6-Hexachlorobiphenyl	0	0.0207055	0.01714	0	0.00108594	7.9e-05	343
2,2',3,4',5,6'-Hexachlorobiphenyl	0	0.0199881	0.016707	0	0.0010324	7.7e-05	344
2,2',3,4',5',6-Hexachlorobiphenyl	0	0.0212121	0.017596	0	0.00113321	8.2e-05	345
2,2',3,4,5-Pentachlorobiphenyl	1e-06	0.0224127	0.017033	0	0.00117775	7.7e-05	346
2,2',3,4,5'-Pentachlorobiphenyl	1e-06	0.0240702	0.018697	0	0.00134651	8.9e-05	347
2,2',3,4',5-Pentachlorobiphenyl	1e-06	0.0234381	0.018327	0	0.00129464	8.7e-05	348
2,2',3,4',5'-Pentachlorobiphenyl	1e-06	0.0233495	0.01809	0	0.00127918	8.5e-05	349
2,2',3,4,6,6'-Hexachlorobiphenyl	1e-06	0.0202868	0.016554	0	0.00103724	7.4e-05	350
2,2',3,4',6,6'-Hexachlorobiphenyl	1e-06	0.0205841	0.017046	0	0.00107922	7.9e-05	351
2,2',3,4,6-Pentachlorobiphenyl	1e-06	0.0231909	0.017707	0	0.00124917	8.1e-05	352
2,2',3,4,6'-Pentachlorobiphenyl	1e-06	0.0238075	0.018402	0	0.00131466	8.6e-05	353
2,2',3,4',6-Pentachlorobiphenyl	1e-06	0.0245715	0.01916	0	0.00139624	9.2e-05	354
2,2',3,4',6'-Pentachlorobiphenyl	1e-06	0.023372	0.018108	0	0.00128079	8.5e-05	355
2,2',3,4-Tetrachlorobiphenyl	3e-06	0.0268329	0.019169	0	0.00153605	9.1e-05	356
2,2',3,4'-Tetrachlorobiphenyl	3e-06	0.0271613	0.019678	0	0.00158047	9.5e-05	357
2,2,3,4-Tetramethylpentane	2e-05	0.017118	0.007862	1e-06	0.000562808	2.9e-05	358
2,2',3,5,5',6-Hexachlorobiphenyl	0	0.0211492	0.017522	0	0.00112429	8.1e-05	359
2,2',3,5,5'-Pentachlorobiphenyl	1e-06	0.0237673	0.018633	0	0.00132697	8.9e-05	360
2,2',3,5,6,6'-Hexachlorobiphenyl	1e-06	0.0205665	0.016769	0	0.00106349	7.6e-05	361
2,2',3,5,6-Pentachlorobiphenyl	1e-06	0.0235062	0.017997	0	0.00128373	8.4e-05	362
2,2',3,5,6'-Pentachlorobiphenyl	1e-06	0.023448	0.018273	0	0.00129073	8.6e-05	363
2,2',3,5',6-Pentachlorobiphenyl	1e-06	0.0251214	0.019582	0	0.00145263	9.6e-05	364
2,2',3,5-Tetrachlorobiphenyl	2e-06	0.0263306	0.018973	0	0.00150024	9.1e-05	365
2,2',3,5'-Tetrachlorobiphenyl	3e-06	0.0277896	0.020174	0	0.00164486	9.9e-05	366
2,2',3,6,6'-Pentachlorobiphenyl	2e-06	0.0245777	0.018966	0	0.00139091	9.1e-05	367
2,2',3,6-Tetrachlorobiphenyl	4e-06	0.0282917	0.020327	0	0.00168075	9.9e-05	368
2,2',3,6'-Tetrachlorobiphenyl	4e-06	0.0281404	0.020235	0	0.00166452	9.8e-05	369
2,2',3-Trichlorobiphenyl	7e-06	0.0314203	0.021002	0	0.00191357	0.000103	370
2,2,3-Trimethylbutane	9.6e-05	0.0216499	0.007964	8e-06	0.000746215	3.1e-05	371
2,2,3-Trimethylhexane	1.1e-05	0.0167488	0.007801	1e-06	0.000541226	2.8e-05	372
2,2,3-Trimethylpentane	3.4e-05	0.0188235	0.007868	2e-06	0.000630365	3e-05	373
2,2',4,4',5,5'-Hexachlorobiphenyl	0	0.0205724	0.017121	0	0.00107832	7.9e-05	374
2,2',4,4',5,6'-Hexachlorobiphenyl	0	0.0202118	0.016906	0	0.0010549	7.9e-05	375
2,2',4,4',5-Pentachlorobiphenyl	1e-06	0.023309	0.018236	0	0.00128558	8.7e-05	376
2,2'4,4'6,6'-Hexachlorobiphenyl	0	0.0194275	0.016291	0	0.000988742	7.5e-05	377
2,2,4,4,6,8,8-Heptamethylnonane	0	0.010342	0.008186	0	0.000315315	2.7e-05	378
2,2',4,4',6-Pentachlorobiphenyl	1e-06	0.0234429	0.018385	0	0.00129988	8.8e-05	379
2,2',4,4'-Tetrachlorobiphenyl	2e-06	0.027213	0.019874	0	0.0015941	9.7e-05	380
2,2,4,4-Tetramethyl-1,3-cyclobutanediol.coskf	0.005807	0.421932	0.419733	0.001587	0.57632	0.328173	381
2,2,4,4-Tetramethylpentane	2e-05	0.0177436	0.008194	1e-06	0.000605529	3.1e-05	382
2,2',4,5,5'-Pentachlorobiphenyl	1e-06	0.0240217	0.018823	0	0.0013529	9.1e-05	383
2,2',4,5,6'-Pentachlorobiphenyl	1e-06	0.0239052	0.018604	0	0.00133523	8.9e-05	384
2,2',4,5',6-Pentachlorobiphenyl	1e-06	0.0238479	0.018766	0	0.00134163	9.1e-05	385
2,2',4,5-Tetrachlorobiphenyl	2e-06	0.0264492	0.019088	0	0.00151006	9.1e-05	386
2,2',4,5'-Tetrachlorobiphenyl	2e-06	0.0278399	0.020407	0	0.00165778	0.000101	387
2,2',4,6,6'-Pentachlorobiphenyl	1e-06	0.023148	0.018074	0	0.00126639	8.5e-05	388
2,2',4,6-Tetrachlorobiphenyl	3e-06	0.0269695	0.019446	0	0.00156126	9.4e-05	389
2,2',4,6'-Tetrachlorobiphenyl	4e-06	0.0282075	0.020561	0	0.00168349	0.000101	390
2,2',4-Trichlorobiphenyl	6e-06	0.0314457	0.021223	0	0.00192458	0.000105	391
2,2,4-Trimethyl-1,3-pentanediol	0.002894	0.384475	0.341953	0.001017	0.76037	0.309959	392
2,2,4-Trimethyl-1,3-pentanediol_diisobutyrate.coskf	4e-06	0.127691	0.118442	1e-06	0.562231	0.077764	393
2,2,4-Trimethylhexane	1.1e-05	0.0164321	0.007692	1e-06	0.000527391	2.8e-05	394
2,2,4-Trimethylpentane	3.2e-05	0.0188486	0.007873	2e-06	0.000632127	3e-05	395
2,2',5,5'-Tetrachlorobiphenyl	3e-06	0.0286279	0.021092	0	0.00173401	0.000105	396
2,2,5,5-Tetramethylhexane	5e-06	0.0156572	0.008034	0	0.000512225	2.9e-05	397
2,2',5,6'-Tetrachlorobiphenyl	4e-06	0.0284766	0.020874	0	0.00171292	0.000103	398
2,2',5-Trichlorobiphenyl	7e-06	0.0322612	0.021864	0	0.00200107	0.000108	399
2,2,5-Trimethylhexane	9e-06	0.0166491	0.007783	0	0.000537134	2.8e-05	400
2,2',6,6'-Tetrachlorobiphenyl	5e-06	0.0279516	0.020272	0	0.00165565	9.9e-05	401
2,2',6-Trichlorobiphenyl	1.1e-05	0.0332825	0.022401	0	0.00209247	0.000111	402
2-2-Butoxyethoxy-ethanol	0.000683	0.386797	0.31454	0.000454	1.27711	0.366708	403
2,2-Dichloro-1,1,1-trifluoroethane	0.001258	0.0790364	0.028966	0.000184	0.00649682	0.000193	404
2,2-Dichloro-1,1,2-trifluoroethane	0.001461	0.0826297	0.029644	0.000215	0.00662386	0.000188	405
2,2'-Dichlorobiphenyl	2.1e-05	0.037783	0.023375	1e-06	0.00244619	0.000116	406
2,2-Dimethyl-1-propanol	0.008794	0.540691	0.313957	0.004246	1.27232	0.307828	407
2,2-Dimethyl-3-ethylpentane	1.5e-05	0.0166909	0.007733	1e-06	0.000538114	2.8e-05	408
2,2-Dimethylbutane	0.00018	0.0240634	0.007811	1.9e-05	0.00083149	3.1e-05	409
2,2-Dimethylheptane	6e-06	0.0160766	0.007571	0	0.000505879	2.7e-05	410
2,2-Dimethylhexane	1.8e-05	0.0179357	0.0076	1e-06	0.000578535	2.8e-05	411
2,2-Dimethyloctane	2e-06	0.0145416	0.007554	0	0.000446394	2.6e-05	412
2,2-Dimethylpentane	5.7e-05	0.0205924	0.007692	4e-06	0.00068425	2.9e-05	413
2,2-Dimethylpropane	0.000453	0.0289858	0.008048	6e-05	0.00105643	3.4e-05	414
2,2-Diphenyl_propane	1.4e-05	0.0373849	0.023806	0	0.00249749	0.000118	415
2-2-Ethoxyethoxy-ethanol	0.006001	0.606023	0.440486	0.006426	1.69655	0.548158	416
2-2-Hexoxyethoxy-ethanol	8.2e-05	0.259533	0.239542	3.3e-05	0.865394	0.254884	417
2,2'-Iminobis-acetonitrile	miscible	#VALUE!	#VALUE!	0.031018	1.03967	0.365694	418
2-2-Methoxyethoxy-ethanol	0.020623	0.809053	0.581351	0.036393	1.48457	0.76232	419
2-(2-Pentoxyethoxy)ethanol	0.000215	0.446071	0.286474	0.000295	2.7632	0.522455	420
2,3,3,3-Tetrafluoropropene	0.00179	0.0679889	0.018744	0.0003	0.00425964	0.000102	421
2,3,3',4,4',5,5',6-Octachlorobiphenyl.coskf	0	0.0155822	0.013992	0	0.000695295	5.7e-05	422
2,3,3',4,4',5,5'-Heptachlorobiphenyl.coskf	0	0.0168419	0.014328	0	0.000773752	6e-05	423
2,3,3',4,4',5,6-Heptachlorobiphenyl	0	0.0180497	0.015449	0	0.000870747	6.6e-05	424
2,3,3',4,4',5',6-Heptachlorobiphenyl.coskf	0	0.017674	0.015341	0	0.000851663	6.7e-05	425
2,3,3',4,4',5-Hexachlorobiphenyl	0	0.0192759	0.015542	0	0.000946435	6.8e-05	426
2,3,3',4,4',5'-Hexachlorobiphenyl	0	0.0192321	0.015538	0	0.000943848	6.8e-05	427
2,3,3',4,4',6-Hexachlorobiphenyl	0	0.0206915	0.016948	0	0.00107582	7.7e-05	428
2,3,3',4,4'-Pentachlorobiphenyl	1e-06	0.0222337	0.016945	0	0.00116672	7.7e-05	429
2,3,3',4,5,5',6-Heptachlorobiphenyl	0	0.0175755	0.015138	0	0.000836845	6.5e-05	430
2,3,3',4',5,5',6-Heptachlorobiphenyl.coskf	0	0.018042	0.015719	0	0.00088609	7e-05	431
2,3,3',4,5,5'-Hexachlorobiphenyl	0	0.0190577	0.015503	0	0.000932743	6.8e-05	432
2,3,3',4',5,5'-Hexachlorobiphenyl	0	0.0193163	0.015762	0	0.000958103	7e-05	433
2,3,3',4,5,6-Hexachlorobiphenyl	0	0.020286	0.016256	0	0.00102256	7.1e-05	434
2,3,3',4,5',6-Hexachlorobiphenyl	0	0.0203138	0.016739	0	0.00104693	7.6e-05	435
2,3,3',4',5,6-Hexachlorobiphenyl	0	0.0210121	0.017281	0	0.00110611	7.9e-05	436
2,3,3',4',5',6-Hexachlorobiphenyl	0	0.0207909	0.017149	0	0.00109097	7.9e-05	437
2,3,3',4,5-Pentachlorobiphenyl	1e-06	0.0215749	0.016296	0	0.00109979	7.2e-05	438
2,3,3',4,5'-Pentachlorobiphenyl	1e-06	0.0219374	0.016865	0	0.00114689	7.7e-05	439
2,3,3',4',5-Pentachlorobiphenyl	1e-06	0.0223201	0.017165	0	0.00118225	7.9e-05	440
2,3,3',4',5'-Pentachlorobiphenyl	1e-06	0.0218728	0.016592	0	0.00113307	7.5e-05	441
2,3,3',4,6-Pentachlorobiphenyl	1e-06	0.0231988	0.017759	0	0.0012537	8.2e-05	442
2,3,3',4',6-Pentachlorobiphenyl	1e-06	0.0246133	0.01909	0	0.00139799	9.2e-05	443
2,3,3',4-Tetrachlorobiphenyl	2e-06	0.0253355	0.017995	0	0.00139495	8.4e-05	444
2,3,3',4'-Tetrachlorobiphenyl	2e-06	0.0256355	0.018248	0	0.0014267	8.6e-05	445
2,3,3,4-Tetramethylpentane	2.2e-05	0.0171128	0.007855	1e-06	0.00056252	2.9e-05	446
2,3,3',5,5',6-Hexachlorobiphenyl	0	0.0206216	0.01705	0	0.00107914	7.9e-05	447
2,3,3',5,5'-Pentachlorobiphenyl	0	0.02203	0.017102	0	0.0011633	7.9e-05	448
2,3,3',5,6-Pentachlorobiphenyl	1e-06	0.0237442	0.018229	0	0.00130497	8.5e-05	449
2,3,3',5',6-Pentachlorobiphenyl	1e-06	0.0240197	0.018723	0	0.00134719	9e-05	450
2,3,3',5-Tetrachlorobiphenyl	2e-06	0.0251765	0.018046	0	0.00138957	8.5e-05	451
2,3,3',5'-Tetrachlorobiphenyl	2e-06	0.0252094	0.018107	0	0.00139244	8.5e-05	452
2,3,3',6-Tetrachlorobiphenyl	3e-06	0.0281527	0.020279	0	0.00167016	9.9e-05	453
2,3,3'-Trichlorobiphenyl	5e-06	0.0295479	0.019486	0	0.00172799	9.4e-05	454
2,3,3-Trimethyl-1-butene	0.0002	0.0356409	0.012798	2e-05	0.00180752	5.9e-05	455
2,3,3-Trimethylpentane	3.7e-05	0.0185926	0.007729	2e-06	0.000612176	2.9e-05	456
2,3',4,4',5,5'-Hexachlorobiphenyl	0	0.0192117	0.015624	0	0.000947312	6.9e-05	457
2,3,4,4',5,6-Hexachlorobiphenyl	0	0.0206908	0.016616	0	0.00105726	7.3e-05	458
2,3',4,4',5',6-Hexachlorobiphenyl	0	0.0197499	0.016384	0	0.00100351	7.4e-05	459
2,3,4,4',5-Pentachlorobiphenyl	1e-06	0.0221421	0.016744	0	0.00114991	7.5e-05	460
2,3',4,4',5-Pentachlorobiphenyl	1e-06	0.0220958	0.016949	0	0.00116239	7.8e-05	461
2,3',4,4',5'-Pentachlorobiphenyl	1e-06	0.0216656	0.016567	0	0.00111975	7.5e-05	462
2,3,4,4',6-Pentachlorobiphenyl	1e-06	0.0235839	0.018132	0	0.00128972	8.4e-05	463
2,3',4,4',6-Pentachlorobiphenyl	1e-06	0.0234312	0.018257	0	0.0012936	8.7e-05	464
2,3,4,4'-Tetrachlorobiphenyl	2e-06	0.0259642	0.018463	0	0.00145309	8.7e-05	465
2,3',4,4'-Tetrachlorobiphenyl	2e-06	0.0253446	0.018193	0	0.00140642	8.6e-05	466
2,3',4,5,5'-Pentachlorobiphenyl	0	0.0218997	0.016955	0	0.00115006	7.8e-05	467
2,3',4',5,5'-Pentachlorobiphenyl	1e-06	0.0222884	0.017095	0	0.00117856	7.9e-05	468
2,3,4,5,6-Pentachlorobiphenyl	1e-06	0.0221328	0.016402	0	0.00113604	7.1e-05	469
2,3,4',5,6-Pentachlorobiphenyl	1e-06	0.0241041	0.018579	0	0.00134346	8.8e-05	470
2,3',4,5',6-Pentachlorobiphenyl	1e-06	0.0227345	0.017871	0	0.00123765	8.5e-05	471
2,3',4',5',6-Pentachlorobiphenyl	1e-06	0.0226577	0.01757	0	0.0012137	8.1e-05	472
2,3,4,5-Tetrachlorobiphenyl	2e-06	0.0239863	0.01664	0	0.00125597	7.4e-05	473
2,3,4',5-Tetrachlorobiphenyl	2e-06	0.0258237	0.018515	0	0.00144896	8.8e-05	474
2,3',4,5-Tetrachlorobiphenyl	2e-06	0.0251207	0.017939	0	0.00138074	8.4e-05	475
2,3',4,5'-Tetrachlorobiphenyl	1e-06	0.0249381	0.018067	0	0.00137828	8.6e-05	476
2,3',4',5-Tetrachlorobiphenyl	2e-06	0.026013	0.018716	0	0.00146866	8.9e-05	477
2,3',4',5'-Tetrachlorobiphenyl	2e-06	0.0242366	0.017087	0	0.00128992	7.8e-05	478
2,3,4,6-Tetrachlorobiphenyl	3e-06	0.0260603	0.018337	0	0.00146051	8.6e-05	479
2,3,4',6-Tetrachlorobiphenyl	3e-06	0.0287921	0.020863	0	0.00173509	0.000103	480
2,3',4,6-Tetrachlorobiphenyl	2e-06	0.0267544	0.019368	0	0.00154502	9.4e-05	481
2,3',4',6-Tetrachlorobiphenyl	3e-06	0.0279545	0.020214	0	0.00165552	9.9e-05	482
2,3,4-Trichlorobiphenyl	5e-06	0.0287454	0.018661	0	0.0016406	8.8e-05	483
2,3,4'-Trichlorobiphenyl	6e-06	0.0304154	0.020066	0	0.00181193	9.8e-05	484
2,3',4-Trichlorobiphenyl	4e-06	0.02924	0.019435	0	0.00170483	9.4e-05	485
2,3',4'-Trichlorobiphenyl	5e-06	0.0289268	0.019033	0	0.00166664	9.1e-05	486
2,3,4-Trimethylpentane	3.2e-05	0.0183326	0.007677	2e-06	0.00060132	2.9e-05	487
2,3',5,5'-Tetrachlorobiphenyl	1e-06	0.0257102	0.018661	0	0.00145176	9e-05	488
2,3,5,6-Tetrachlorobiphenyl	3e-06	0.0267168	0.01879	0	0.00152101	8.9e-05	489
2,3',5',6-Tetrachlorobiphenyl	2e-06	0.0268544	0.019564	0	0.0015573	9.5e-05	490
2,3,5-Trichlorobiphenyl	4e-06	0.0283465	0.018564	0	0.00161125	8.8e-05	491
2,3',5-Trichlorobiphenyl	5e-06	0.0299674	0.019962	0	0.00177951	9.8e-05	492
2,3',5'-Trichlorobiphenyl	4e-06	0.0282081	0.01875	0	0.00160472	8.9e-05	493
2,3,5-Trimethylthiophene	0.000197	0.0493567	0.019283	1.7e-05	0.00313707	9.6e-05	494
2,3,6-Trichlorobiphenyl	8e-06	0.0321098	0.021294	0	0.0019804	0.000105	495
2,3',6-Trichlorobiphenyl	8e-06	0.0326836	0.022069	0	0.00203624	0.000109	496
2,3-Butanediol.coskf	miscible	#VALUE!	#VALUE!	miscible	#VALUE!	#VALUE!	497
2,3-Butanedione	0.049709	0.735071	0.352337	0.019203	1.11921	0.057005	498
2,3-Dichloro-1-propanol	0.020623	0.578153	0.343127	0.006077	0.936112	0.157147	499
2,3-Dichlorobiphenyl	1.5e-05	0.034443	0.020699	1e-06	0.00211046	0.000101	500
2,3'-Dichlorobiphenyl	1.3e-05	0.0340969	0.020737	0	0.00207742	0.000101	501
2,3-Dichlorobutane	0.000864	0.0740157	0.026512	9.6e-05	0.00538926	0.000138	502
2,3-Dichloropropene	0.002313	0.096501	0.030079	0.000329	0.00735082	0.000164	503
2,3-Dihydrofuran	0.019266	0.440706	0.134832	0.007223	0.618559	0.018382	504
2,3-Dimethyl-1,3-butadiene	0.000719	0.0561464	0.017403	9e-05	0.00338345	8.5e-05	505
2,3-Dimethyl-1-butene	0.00037	0.04219	0.013311	4.4e-05	0.00222054	6.2e-05	506
2,3-Dimethyl-1-hexene	4.5e-05	0.0288743	0.011751	3e-06	0.00137428	5.2e-05	507
2,3-Dimethyl-2,3-diphenylbutane	2e-06	0.0250985	0.019005	0	0.00145723	8.8e-05	508
2,3-Dimethyl-2-butene	0.000328	0.0389177	0.012152	3.8e-05	0.00191335	5.6e-05	509
2,3-Dimethylbenzothiophene	8.8e-05	0.0465452	0.022898	5e-06	0.00309505	0.000115	510
2,3-Dimethylbutane	0.000161	0.0234449	0.007644	1.6e-05	0.000793783	3e-05	511
2,3-Dimethyldecane	0	0.012068	0.007484	0	0.000351424	2.4e-05	512
2,3-Dimethyldodecane	0	0.0104904	0.007501	0	0.000295607	2.3e-05	513
2,3-Dimethylheptane	6e-06	0.015936	0.007524	0	0.000498986	2.7e-05	514
2,3-Dimethylhexane	1.8e-05	0.0175323	0.007435	1e-06	0.000553504	2.7e-05	515
2,3-Dimethylnonane	1e-06	0.0131769	0.007509	0	0.0003934	2.5e-05	516
2,3-Dimethyloctane	2e-06	0.0142126	0.007366	0	0.000426217	2.5e-05	517
2,3-Dimethylpentane	5.7e-05	0.0201721	0.007569	4e-06	0.000664017	2.9e-05	518
2,3-Dimethylthiophene	0.00072	0.0678968	0.024153	8.1e-05	0.00476963	0.000125	519
2,3-Dimethylundecane	0	0.0109748	0.007354	0	0.000309684	2.3e-05	520
2,3-Epoxy-1-propanol.coskf	miscible	#VALUE!	#VALUE!	miscible	#VALUE!	#VALUE!	521
2,3-Pentadiene	0.001185	0.0676812	0.017871	0.00017	0.00419663	8.9e-05	522
2,3-Xylenol	0.00249	0.212086	0.168322	0.000561	0.122874	0.115476	523
2,4,4',5-Tetrachlorobiphenyl	2e-06	0.0256545	0.018375	0	0.00143244	8.7e-05	524
2,4,4',6-Tetrachlorobiphenyl	2e-06	0.0264799	0.019222	0	0.00152089	9.3e-05	525
2,4,4'-Trichlorobiphenyl	5e-06	0.0299306	0.019926	0	0.00177128	9.7e-05	526
2,4,4-Trimethyl-1-pentene	7.3e-05	0.0276646	0.011127	5e-06	0.00126259	4.9e-05	527
2,4,4-Trimethyl-2-pentene	5.6e-05	0.0271455	0.010904	4e-06	0.00121661	4.7e-05	528
2,4,4-Trimethylhexane	1.3e-05	0.016626	0.007726	1e-06	0.000535353	2.8e-05	529
2,4,5-Trichlorobiphenyl	4e-06	0.0283485	0.018531	0	0.00161188	8.8e-05	530
2,4',5-Trichlorobiphenyl	5e-06	0.0306623	0.020538	0	0.00184532	0.000101	531
2,4,6-Trichlorobiphenyl	6e-06	0.0304224	0.020114	0	0.00182476	9.9e-05	532
2,4',6-Trichlorobiphenyl	7e-06	0.0325645	0.02213	0	0.0020336	0.00011	533
2,4,6-Triiodophenol	3.4e-05	0.0508431	0.045379	3e-06	0.014947	0.020205	534
2,4,6-Trimethylpyridine	0.000951	0.746648	0.297638	0.000398	5.13734	0.420471	535
2,4,6-Trinitrophenol	0.00199	0.224292	0.174786	0.000111	0.0707358	0.021505	536
2,4,6-Trinitrotoluene	0.000911	0.176271	0.12186	3.8e-05	0.0489051	0.002567	537
2,4-Diaminotoluene	0.018204	0.43821	0.386008	0.007225	0.297423	0.175059	538
2,4-Dichlorobenzotrifluoride	5.4e-05	0.0357957	0.017748	3e-06	0.00206005	8.9e-05	539
2,4-Dichlorobiphenyl	1.2e-05	0.0338459	0.020518	0	0.00206337	0.000101	540
2,4'-Dichlorobiphenyl	1.4e-05	0.0350518	0.021447	0	0.00217042	0.000105	541
2,4-Dichlorotoluene	0.000113	0.0393738	0.01684	9e-06	0.00220914	8.1e-05	542
2,4-Dimethyl-1,3-dioxolane-2-methanol.coskf	0.012703	0.676038	0.421174	0.017106	1.91553	0.546647	543
2,4-Dimethyl-3-ethylpentane	1.3e-05	0.0165082	0.007658	1e-06	0.0005293	2.8e-05	544
2,4-Dimethylaniline	0.002543	0.279947	0.173222	0.000487	0.419768	0.074298	545
2,4-Dimethylhexane	1.7e-05	0.0172806	0.007325	1e-06	0.000536515	2.6e-05	546
2,4-Dimethyloctane	2e-06	0.014414	0.007478	0	0.000440155	2.6e-05	547
2,4-Dimethylpentane	5e-05	0.0198085	0.007433	4e-06	0.000641155	2.8e-05	548
2,4-Dinitrophenol	0.028011	0.65292	0.690779	0.007598	0.533984	0.628397	549
2,4-Dinitrotoluene	0.001374	0.209022	0.115294	0.000143	0.117881	0.005386	550
2,4-Diphenyl-4-methyl-1-pentene	2e-06	0.0287442	0.022234	0	0.00180597	0.000106	551
2,4-Pentanediol.coskf	miscible	#VALUE!	#VALUE!	miscible	#VALUE!	#VALUE!	552
2,4-Toluene_diisocyanate	6.2e-05	0.0521284	0.026651	3e-06	0.00374458	0.000142	553
2,4-Xylenol	0.001876	0.201783	0.157928	0.000421	0.116316	0.101124	554
2,5-Dichlorobiphenyl	1.3e-05	0.0346251	0.021108	0	0.00213782	0.000104	555
2,5-Dihydrofuran	0.04699	0.977262	0.419734	0.050336	2.16072	0.622698	556
2,5-Dimethyl-1,5-hexadiene	0.00011	0.0456539	0.01857	8e-06	0.00287096	9.2e-05	557
2,5-Dimethyl-2,4-hexadiene	8.7e-05	0.0417359	0.016814	6e-06	0.00246093	8.1e-05	558
2,5-Dimethylhexane	1.4e-05	0.0174922	0.007444	1e-06	0.000552408	2.7e-05	559
2,5-Dimethyloctane	2e-06	0.0141346	0.007381	0	0.000423806	2.5e-05	560
2,5-Dimethylthiophene	0.000582	0.0660634	0.023265	6.3e-05	0.00460759	0.00012	561
2,5-Dinitrotoluene	0.001262	0.196922	0.108546	0.000123	0.0997452	0.004528	562
2,5-Xylenol	0.002979	0.251493	0.274457	0.000902	0.180232	0.291557	563
2,6,8-Trimethyl-4-nonanone	1.4e-05	0.156793	0.098992	3e-06	1.08919	0.112149	564
2,6-Diaminotoluene	0.024808	0.656956	0.498574	0.007576	1.21914	0.327833	565
2,6-Dichlorobiphenyl	2.1e-05	0.0380348	0.023446	1e-06	0.00247856	0.000117	566
2,6-Diethylaniline	0.000245	0.150494	0.093346	3.1e-05	0.27863	0.037123	567
2,6-Diethylnaphthalene	6e-06	0.0311941	0.018688	0	0.00181956	8.7e-05	568
2,6-Dimethyl-4-heptanol	5.2e-05	0.158124	0.085446	9e-06	0.835041	0.096962	569
2,6-Dimethylheptane	5e-06	0.0156995	0.00742	0	0.00048354	2.6e-05	570
2,6-Dimethylnaphthalene	3.7e-05	0.0382382	0.019244	2e-06	0.00230547	9.2e-05	571
2,6-Dimethyloctane	2e-06	0.0142771	0.007436	0	0.000429839	2.5e-05	572
2,6-Dimethylpyridine	0.002333	0.747577	0.282673	0.001099	4.84725	0.399716	573
2,6-Dinitrophenol	0.003576	0.246821	0.152452	0.000316	0.0900018	0.012697	574
2,6-Dinitrotoluene	0.001586	0.207623	0.118478	0.000147	0.103474	0.004858	575
2,6-Di-tert-butyl-p-cresol	1e-06	0.0259459	0.028753	0	0.0059509	0.025263	576
2,6-Naphthalenedicarboxylic_acid	0.007675	0.455087	0.595313	0.002961	0.409993	0.577214	577
2,6-Pyridinedimethanol	0.045359	0.786609	0.719882	0.016265	0.93691	0.553661	578
2,6-Toluene_diisocyanate	6.6e-05	0.051378	0.025948	3e-06	0.00365837	0.000137	579
2,6-Xylenol	0.001839	0.187389	0.154464	0.000433	0.107057	0.117763	580
2,7-Dichlorodibenzo-p-dioxin	8e-06	0.0340849	0.022005	0	0.00216287	0.000112	581
2,7-Dimethylbenzothiophene	8.6e-05	0.0478642	0.023641	5e-06	0.00323311	0.000119	582
2,7-Dimethylnaphthalene	3.8e-05	0.0384302	0.019353	2e-06	0.00232789	9.3e-05	583
2,7-Dimethyloctane	2e-06	0.0142652	0.007442	0	0.000429626	2.5e-05	584
2-Acetoacetoxy-ethyl_methacrylate	0.000604	0.309862	0.230151	0.000211	0.588571	0.054557	585
2-Acetyl-1-naphthol	0.000152	0.117835	0.065262	1.7e-05	0.173281	0.008245	586
2-(alpha-Methylbenzyloxy)-1-propanol.coskf	0.000471	0.347798	0.23291	0.000209	1.86827	0.299576	587
2-Amino-2-methyl-1-propanol.coskf	0.055526	1.02091	0.669066	miscible	#VALUE!	#VALUE!	588
2-Amino-3,5-dichloropyridine	0.003398	0.296987	0.222928	0.000835	0.332139	0.125952	589
2-Amino-3-hydroxypyridine	miscible	#VALUE!	#VALUE!	0.046162	1.04413	0.566632	590
2-Amino-4,6-dimethylpyridine	0.006463	0.616508	0.377353	0.002251	2.05822	0.35725	591
2-Amino-4-methyl-3-nitropyridine	0.009617	0.531524	0.382962	0.00367	0.934497	0.24651	592
2-Amino-4-methylpyridine	0.021675	0.785912	0.504784	0.00891	1.99188	0.436171	593
2-Amino-5-chloropyridine	0.017509	0.575834	0.407189	0.005951	0.88617	0.253309	594
2-Amino-5-nitropyridine	miscible	#VALUE!	#VALUE!	0.023152	0.738965	0.508568	595
2-Aminoethoxyethanol.coskf	miscible	#VALUE!	#VALUE!	miscible	#VALUE!	#VALUE!	596
2-Aminopyridine	0.096666	0.928269	0.685087	0.029011	1.71871	0.501115	597
2-Bromobutane	0.00102	0.0723236	0.022363	0.000131	0.00505772	0.000116	598
2-Bromopropane	0.003853	0.113251	0.030425	0.000589	0.00906127	0.000161	599
2-Butanol	0.01644	0.634252	0.361749	0.007491	1.27401	0.327634	600
2-Butanone.coskf	0.049957	1.00883	0.502256	miscible	#VALUE!	#VALUE!	601
2-Buten-1-ol,_acetate	0.002373	0.368341	0.161788	0.001015	1.01811	0.059463	602
2-Butoxime	0.024571	0.630699	0.443524	0.010323	0.778843	0.308051	603
2-Butoxyethanol	0.003862	0.49764	0.352957	0.001914	1.29394	0.386684	604
2-Butyl-1-decanol	0	0.076881	0.078737	0	0.128556	0.04234	605
2-Butyl-2-ethyl-1,3-propanediol	0.000664	0.380759	0.30009	0.000266	1.40466	0.358927	606
2-Butylbenzothiophene	8e-06	0.0320871	0.01886	0	0.00188096	8.9e-05	607
2-Butyl-nonan-1-ol	1e-06	0.111282	0.102744	0	0.326722	0.084249	608
2-Butyl-octan-1-ol	3e-06	0.104974	0.100571	0	0.216446	0.064696	609
2-Butyne-1,4-diol.coskf	miscible	#VALUE!	#VALUE!	miscible	#VALUE!	#VALUE!	610
2-Butyne	0.00813	0.179276	0.04301	0.00143	0.016506	0.00023	611
2-Chloro-1,1,1,2-tetrafluoroethane	0.002369	0.0991713	0.033596	0.000391	0.00878294	0.000227	612
2-Chloro-1,1,1-trifluoroethane	0.005826	0.143823	0.045336	0.000981	0.0128473	0.000263	613
2-Chloro-1,1-difluoroethylene	0.004069	0.0840274	0.020259	0.000759	0.00561665	0.000118	614
2-Chloro-1,3-propanediol.coskf	miscible	#VALUE!	#VALUE!	miscible	#VALUE!	#VALUE!	615
2-Chlorobiphenyl	3.6e-05	0.0405768	0.022507	2e-06	0.00261186	0.000111	616
2-Chlorodibenzo-p-dioxin	2.2e-05	0.0393658	0.023134	1e-06	0.00264734	0.000121	617
2-Chloroethanol	miscible	#VALUE!	#VALUE!	0.085525	0.963214	0.548376	618
2-Chloropentane	0.000395	0.0572673	0.019214	4.3e-05	0.00373575	9.8e-05	619
2-Chlorophenoxyacetic_acid	0.004643	0.347547	0.411711	0.001058	0.263792	0.38403	620
2-Chloropropane	0.004581	0.118234	0.029967	0.000741	0.00946695	0.000159	621
2-Chloropropene	0.004723	0.101749	0.024926	0.000815	0.00720802	0.000128	622
2-Cyclohexene-1-one.coskf	0.049647	1.07336	0.633502	miscible	#VALUE!	#VALUE!	623
2-Cyclohexenyl_cyclohexanone	0.000124	0.244105	0.141035	4.6e-05	1.73969	0.179007	624
2-Cyclohexyl_cyclohexanone	6e-05	0.183683	0.106129	1.9e-05	1.16903	0.115796	625
2-Difluoromethoxy-1,1,1-trifluoroethane.coskf	0.002486	0.137035	0.055367	0.000309	0.0132399	0.000343	626
2-Ethoxyethanol	0.04299	0.88403	0.621922	0.042026	1.41065	0.72131	627
2-Ethoxyethyl_acetate	0.002491	0.460997	0.228895	0.002227	1.85511	0.167952	628
2-Ethyl-1-butanol	0.002663	0.365058	0.239785	0.000789	0.727905	0.198493	629
2-Ethyl-1-butene	0.000321	0.0399972	0.012645	3.7e-05	0.00205502	5.9e-05	630
2-Ethyl-1-hexanol	0.000388	0.273681	0.204546	8.8e-05	0.68802	0.186299	631
2-Ethyl-1-hexene	3.5e-05	0.0274683	0.011178	2e-06	0.00126923	4.9e-05	632
2-Ethyl-1-pentene	9.3e-05	0.0324845	0.011717	8e-06	0.0015686	5.3e-05	633
2-Ethyl-2-hexenal	0.000585	0.339234	0.162351	0.000314	1.7967	0.158657	634
2-Ethylbenzothiophene	7.3e-05	0.0455757	0.022606	4e-06	0.00299575	0.000113	635
2-Ethyl_butyric_acid	0.004574	0.322509	0.308257	0.001532	0.253691	0.273332	636
2-Ethylhexanal	0.000262	0.212969	0.100661	8.1e-05	0.723359	0.045646	637
2-Ethyl_hexanoic_acid	0.000487	0.189037	0.216973	0.00012	0.132589	0.187035	638
2-Ethylhexyl_acetate	2.5e-05	0.144037	0.084403	5e-06	0.461217	0.034965	639
2-Ethylhexyl_acrylate	1.2e-05	0.119849	0.074057	2e-06	0.340713	0.026002	640
2-Ethylhexyl_benzoate	1e-06	0.0655003	0.048149	0	0.0877116	0.006567	641
2-Ethyl-m-xylene	7.1e-05	0.0382333	0.017317	5e-06	0.0022422	8.2e-05	642
2-Ethylnaphthalene	4.3e-05	0.038753	0.019405	2e-06	0.00235421	9.4e-05	643
2-Ethyloxirane	0.018791	0.699587	0.257743	0.015853	2.60784	0.248966	644
2-Ethyl-p-xylene	5.1e-05	0.0357822	0.01623	3e-06	0.00201069	7.5e-05	645
2-Ethyl-tetrahydrothiophene	0.000358	0.0710616	0.026084	3.7e-05	0.00608293	0.000152	646
2-Ethylthiophene	0.000617	0.0653632	0.023412	6.7e-05	0.00451164	0.000121	647
2-Formyl_benzoic_acid	0.00957	0.441486	0.431363	0.004052	0.36715	0.36921	648
2-Heptanol	0.000574	0.311627	0.19875	0.000146	0.920295	0.19684	649
2-Heptanone	0.001123	0.415068	0.190667	0.000698	2.37332	0.233858	650
2-Hexanol	0.001553	0.355486	0.217617	0.000469	0.892929	0.198525	651
2-Hexanone	0.00383	0.563141	0.246765	0.003228	2.85568	0.33491	652
2-Hexoxyethanol	0.000383	0.308335	0.248932	0.000142	0.863965	0.254955	653
2-Hexyne	0.000606	0.0771715	0.024482	6.8e-05	0.00582624	0.000132	654
2-Hydroxy-5-nitropyridine.coskf	miscible	#VALUE!	#VALUE!	miscible	#VALUE!	#VALUE!	655
2-Hydroxy-6-methylnicotinic_acid	0.009342	0.473705	0.440394	0.002746	0.385188	0.278356	656
2-Hydroxyacetophenone	0.001917	0.24799	0.114498	0.000463	0.383868	0.017545	657
2-Hydroxycaproic_acid	0.005541	0.373644	0.39985	0.001651	0.28284	0.334886	658
2-Hydroxyethyl_acrylate	0.048222	0.829862	0.64635	0.029535	1.23587	0.528	659
2-Hydroxyethyl_methacrylate	0.014113	0.630696	0.487649	0.008779	1.09921	0.411646	660
2-Hydroxynicotinic_acid	miscible	#VALUE!	#VALUE!	0.063286	0.867483	0.779738	661
2-Hydroxypropyl_acrylate	0.01267	0.728756	0.462717	0.014154	2.02445	0.51581	662
2-Hydroxypropyl_methacrylate	0.006864	0.589837	0.437659	0.005155	1.51191	0.413374	663
2-Hydroxypyridine	0.034756	0.624173	0.436945	0.010981	0.55655	0.244362	664
2-Mercaptobenzothiazole	0.000555	0.190902	0.090808	0.0001	0.983798	0.058191	665
2-Mercaptoethanol	miscible	#VALUE!	#VALUE!	0.078302	1.2054	0.551596	666
2-Methacrylamide.coskf	miscible	#VALUE!	#VALUE!	miscible	#VALUE!	#VALUE!	667
2-Methoxy-2-methylpropane	0.003285	0.516747	0.193482	0.001947	2.89725	0.361077	668
2-Methoxy-5-nitropyridine	0.00267	0.292136	0.143024	0.000553	0.594195	0.028058	669
2-Methoxyethanol_acetate	0.017791	0.821153	0.431772	0.044214	2.37636	0.543762	670
2-Methoxyethanol.coskf	miscible	#VALUE!	#VALUE!	miscible	#VALUE!	#VALUE!	671
2-Methoxypropan-1-ol	0.031904	0.987977	0.548406	0.058532	1.45965	0.804482	672
2-Methoxypropane	0.0069	0.634106	0.219909	0.005645	2.95074	0.398097	673
2-Methyl-1,3-dioxolane.coskf	0.058664	0.99364	0.527586	miscible	#VALUE!	#VALUE!	674
2-Methyl-1,3-pentanediol	0.015691	0.678478	0.553441	0.008163	1.21895	0.542476	675
2-Methyl-1,3-propanediol.coskf	miscible	#VALUE!	#VALUE!	miscible	#VALUE!	#VALUE!	676
2-Methyl-1-butanol	0.007947	0.582963	0.334836	0.004133	1.47591	0.358728	677
2-Methyl-1-butene-3-yne	0.004554	0.137846	0.041663	0.000647	0.0117875	0.000236	678
2-Methyl-1-butene	0.000975	0.055712	0.015009	0.00014	0.00321373	7.3e-05	679
2-Methyl-1-heptanol	0.000224	0.210701	0.163289	3.8e-05	0.41214	0.120042	680
2-Methyl-1-heptene	3e-05	0.0285292	0.011722	2e-06	0.00134689	5.1e-05	681
2-Methyl-1-hexanol	0.000618	0.256696	0.182957	0.000133	0.49036	0.139127	682
2-Methyl-1-hexene	9.5e-05	0.0344943	0.012572	8e-06	0.00173721	5.7e-05	683
2-Methyl-1-nonene	3e-06	0.0212946	0.010708	0	0.000915984	4.4e-05	684
2-Methyl-1-octene	9e-06	0.0243224	0.011125	0	0.00109252	4.7e-05	685
2-Methyl-1-pentanol	0.002181	0.371267	0.239264	0.000663	0.767994	0.200502	686
2-Methyl-1-pentene	0.000289	0.0423933	0.013496	3.2e-05	0.00224982	6.3e-05	687
2-Methyl-1-propanol	0.018975	0.631174	0.381571	0.00814	1.06921	0.318031	688
2-Methyl-1-undecanol	3e-06	0.126644	0.11089	0	0.382834	0.094596	689
2-Methyl-2-aminobutane	0.005616	1.03939	0.407354	0.003011	4.93947	0.508235	690
2-Methyl-2-butanol	0.007858	0.560711	0.319162	0.003493	1.48457	0.328636	691
2-Methyl-2-butene	0.000884	0.0515143	0.013836	0.000125	0.00279186	6.6e-05	692
2-Methyl-2-pentenal	0.006289	0.616147	0.271259	0.006177	2.71462	0.329427	693
2-Methyl-2-pentene	0.000264	0.0388394	0.01217	2.9e-05	0.00193017	5.6e-05	694
2-Methyl-2-propanamine	0.014486	1.21439	0.480947	0.008864	4.66368	0.574481	695
2-Methyl-2-propanol	0.029598	0.821493	0.484502	0.016615	1.72215	0.50172	696
2-Methyl-3-ethylpentane	2.3e-05	0.0176544	0.007465	1e-06	0.00055909	2.7e-05	697
2-Methyl-,_3-hydroxy-2,2,4-trimethylpentyl_propanoate.coskf	4.8e-05	0.188858	0.165316	1.4e-05	0.619838	0.132656	698
2-Methyl-3-nitrobenzoic_acid	0.004771	0.330108	0.36896	0.001263	0.253446	0.349258	699
2-Methylbenzofuran	0.000303	0.0639747	0.026459	2.7e-05	0.00509893	0.00015	700
2-Methyl_benzothiophene	0.000216	0.058013	0.026285	1.6e-05	0.00412164	0.000136	701
2-Methylbutane	0.000335	0.0269351	0.007528	4.2e-05	0.000917208	3e-05	702
2-Methylbutanoic_acid	0.013112	0.465898	0.396553	0.00619	0.394231	0.343307	703
2-Methylbutyraldehyde	0.008232	0.522878	0.204205	0.005782	1.85593	0.127295	704
2-Methyldecane	0	0.0128941	0.007365	0	0.000376651	2.4e-05	705
2-Methyl-dodecan-1-ol	1e-06	0.0963725	0.09601	0	0.189668	0.059796	706
2-Methyldodecane	0	0.010877	0.007332	0	0.000305585	2.3e-05	707
2-Methylheptanal	0.000242	0.209906	0.099204	7.2e-05	0.700521	0.043933	708
2-Methylheptane	1.1e-05	0.0172299	0.007323	1e-06	0.000533974	2.6e-05	709
2-Methylhexanal	0.000764	0.275962	0.12097	0.000289	1.06432	0.068267	710
2-Methylhexane	3.5e-05	0.0195252	0.007359	2e-06	0.000621434	2.7e-05	711
2-Methylhexanoic_acid	0.001408	0.247714	0.265138	0.000433	0.184898	0.237697	712
2-Methylindene	0.000207	0.0564748	0.024006	1.6e-05	0.00391926	0.000122	713
2-Methylnaphthalene	0.000115	0.0471463	0.021727	8e-06	0.00304996	0.000108	714
2-Methylnonane	1e-06	0.0139142	0.007292	0	0.000409664	2.4e-05	715
2-Methyloctanal	8.6e-05	0.167053	0.085182	1.9e-05	0.527242	0.033573	716
2-Methyloctane	4e-06	0.0154873	0.007326	0	0.000468668	2.5e-05	717
2-Methyloctanoic_acid	0.000168	0.153773	0.196858	3.2e-05	0.101505	0.167363	718
2-Methyloxirane	0.098412	0.995073	0.473398	0.165759	1.49944	0.61573	719
2-Methylpentane	0.000108	0.0226628	0.007429	1e-05	0.000749668	2.9e-05	720
2-Methylphenol	0.008862	0.366148	0.354302	0.00381	0.296098	0.371914	721
2-Methylpropanal	0.025795	0.741833	0.292231	0.021069	2.55706	0.241075	722
2-Methylpropanenitrile	0.042619	0.803406	0.351893	0.022296	1.72508	0.102535	723
2-Methylpyrazine	0.039787	1.10409	0.599794	0.079942	1.40759	0.823905	724
2-Methyltetrahydrofuran	0.008613	0.794881	0.315076	0.00848	2.76574	0.545525	725
2-Methylthiacyclopentane	0.001042	0.0931327	0.029931	0.000132	0.00845785	0.000178	726
2-Methyl_thiaindan	0.000218	0.0627988	0.028928	1.6e-05	0.00480741	0.000154	727
2-Methylthiophene	0.001741	0.0876488	0.027465	0.000242	0.00650652	0.000144	728
2-Methyltridecane	0	0.0103364	0.007418	0	0.000288755	2.3e-05	729
2-Methylundecane	0	0.0119371	0.007409	0	0.000345156	2.4e-05	730
2-Nitrobenzonitrile	0.007094	0.353064	0.195823	0.000849	0.225897	0.009996	731
2-Nitropropane	0.013343	0.372249	0.129953	0.003218	0.28037	0.007363	732
2-(N-Morpholino)-2'-hydroxydiethylether.coskf	0.016937	1.07565	0.727429	miscible	#VALUE!	#VALUE!	733
2-Nonanol	7.2e-05	0.210016	0.15226	1.1e-05	0.664232	0.145069	734
2-Nonanone	0.000123	0.263944	0.139282	4.9e-05	1.70315	0.165852	735
2-Norbornene	0.000538	0.0412147	0.012444	6.9e-05	0.00210283	5.9e-05	736
2-n-Propylthiophene	0.000197	0.0507571	0.020337	1.7e-05	0.00328286	0.000104	737
2-Octanol	0.000181	0.221961	0.156161	3.3e-05	0.583788	0.133849	738
2-Octanone	0.000356	0.319503	0.157214	0.000175	1.92917	0.182879	739
2-Oxazolidone.coskf	miscible	#VALUE!	#VALUE!	miscible	#VALUE!	#VALUE!	740
2-Pentanethiol	0.00035	0.0598792	0.021448	3.6e-05	0.00423762	0.000117	741
2-Pentanol	0.006168	0.581987	0.31146	0.003092	1.71914	0.367255	742
2-Pentanone	0.012522	0.770123	0.333613	0.014024	2.88947	0.463769	743
2-Pentoxyethanol	0.000608	0.40193	0.230622	0.000346	1.8084	0.322637	744
2-Pentyne	0.001906	0.106749	0.029079	0.000278	0.00869621	0.000159	745
2-Phenyl-1-butene	9.5e-05	0.0431069	0.019427	6e-06	0.00265924	9.5e-05	746
2-Phenyl-1-propanol	0.001674	0.387238	0.23488	0.000618	1.3958	0.235053	747
2-Phenyl-2-propanol	0.001558	0.249307	0.187801	0.000303	0.316148	0.091647	748
2-Phenylethanol	0.006763	0.464393	0.325371	0.001721	0.836446	0.20879	749
2-Phenylpropionaldehyde	0.001424	0.255473	0.125272	0.000328	0.512518	0.026312	750
2-Propanamine	0.033249	1.29805	0.550485	0.022839	3.68517	0.636398	751
2-Propanol	0.139633	0.981011	0.716344	0.061168	1.41502	0.657592	752
2-Propen-1-ol	miscible	#VALUE!	#VALUE!	0.126044	1.19111	0.687095	753
2-Propenal.coskf	miscible	#VALUE!	#VALUE!	miscible	#VALUE!	#VALUE!	754
2-Propenenitrile	0.21609	0.929771	0.537429	0.035353	1.04068	0.044602	755
2-Propylbenzothiophene	2.3e-05	0.0373325	0.020132	1e-06	0.00229976	9.8e-05	756
2-Propyn-1-ol.coskf	miscible	#VALUE!	#VALUE!	miscible	#VALUE!	#VALUE!	757
2-Pyrrolidone.coskf	miscible	#VALUE!	#VALUE!	miscible	#VALUE!	#VALUE!	758
[3-(2,3-Epoxyproxy)propyl]trimethoxysilane.coskf	0.000173	0.304739	0.230995	0.000234	1.73322	0.237991	759
3,3,3-Trifluoropropene	0.004647	0.105897	0.027986	0.000804	0.00780818	0.00015	760
3,3',4,4',5,5'-Hexachlorobiphenyl	0	0.0198142	0.016345	0	0.00101002	7.5e-05	761
3,3',4,4',5-Pentachlorobiphenyl	1e-06	0.0228861	0.017703	0	0.00123786	8.3e-05	762
3,3',4,4'-Tetrachlorobiphenyl	2e-06	0.0267136	0.019335	0	0.00154278	9.4e-05	763
3,3',4,5,5'-Pentachlorobiphenyl	0	0.022513	0.017568	0	0.00121298	8.3e-05	764
3,3',4,5-Tetrachlorobiphenyl	2e-06	0.0257163	0.018503	0	0.0014413	8.8e-05	765
3,3',4,5'-Tetrachlorobiphenyl	1e-06	0.0262445	0.019133	0	0.00150916	9.4e-05	766
3,3',4-Trichlorobiphenyl	5e-06	0.0305422	0.020478	0	0.00183666	0.000101	767
3,3',5,5'-Tetrachlorobiphenyl	1e-06	0.0259759	0.019078	0	0.00149119	9.4e-05	768
3,3',5-Trichlorobiphenyl	4e-06	0.0298758	0.020142	0	0.00178329	0.0001	769
3,3,5-Trimethylheptane	5e-06	0.014947	0.007663	0	0.000468505	2.7e-05	770
3,3'-Dichlorobiphenyl	1.2e-05	0.0355491	0.022088	0	0.0022349	0.00011	771
3,3-Diethylpentane	1.7e-05	0.0164409	0.007612	1e-06	0.000526318	2.8e-05	772
3,3-Dimethyl-1-butene	0.000406	0.0419744	0.013293	4.9e-05	0.00219157	6.2e-05	773
3,3-Dimethyl-1-butyne	0.001298	0.0937977	0.03245	0.000157	0.00755484	0.000186	774
3,3-Dimethyl-2-butanone	0.006778	0.583999	0.264612	0.006497	2.64661	0.347789	775
3,3-Dimethylhexane	2.5e-05	0.0179936	0.007546	2e-06	0.000579818	2.8e-05	776
3,3-Dimethylpentane	7.6e-05	0.0208069	0.007742	6e-06	0.000700177	3e-05	777
3,4,4',5-Tetrachlorobiphenyl	2e-06	0.0261428	0.018793	0	0.00148056	9e-05	778
3,4,4'-Trichlorobiphenyl	5e-06	0.0311777	0.020929	0	0.00189735	0.000104	779
3,4,5-Trichlorobiphenyl	4e-06	0.0285611	0.018717	0	0.00163028	8.9e-05	780
3,4',5-Trichlorobiphenyl	4e-06	0.0301626	0.020373	0	0.00180861	0.000101	781
3,4,5-Trichloroguaiacol	0.000154	0.0859269	0.083275	2.1e-05	0.0380365	0.067065	782
3,4-Dichloro-1-butene	0.001154	0.0868546	0.031505	0.000131	0.00670301	0.00017	783
3,4-Dichloroaniline	0.004153	0.246754	0.23568	0.002275	0.321382	0.268546	784
3,4-Dichlorobiphenyl	1.2e-05	0.0344213	0.021006	0	0.00212189	0.000104	785
3,4'-Dichlorobiphenyl	1.2e-05	0.0361672	0.022532	0	0.00229779	0.000113	786
3,4-Dichlorophenyl_isocyanate	9.9e-05	0.049384	0.023841	6e-06	0.00335633	0.000127	787
3,4-Dimethylhexane	2e-05	0.0174597	0.007368	1e-06	0.00054877	2.7e-05	788
3,4-Dimethylthiophene	0.000761	0.0706801	0.025426	8.5e-05	0.00506139	0.000133	789
3,4-Dinitrotoluene	0.000858	0.155085	0.086206	6.2e-05	0.0430346	0.001644	790
3,4-Xylenol	0.003782	0.2727	0.2862	0.001072	0.185868	0.277561	791
3,5-Dichlorobiphenyl	1e-05	0.0335802	0.020565	0	0.00204052	0.000101	792
3,5-Dichloropyridine	0.00154	0.346353	0.136628	0.000479	2.27976	0.166077	793
3,5-Diisopropyl_toluene	3e-06	0.0254438	0.01523	0	0.00134003	6.7e-05	794
3,5-Dimethylbenzofuran	0.000155	0.0593061	0.02786	1.1e-05	0.00522561	0.000173	795
3,5-Dimethylbenzothiophene	8.2e-05	0.0469904	0.023433	5e-06	0.00314652	0.000119	796
3,5-Dinitrosalicylic_acid	0.007537	0.427602	0.536507	0.001803	0.361732	0.540259	797
3,5-Dinitrotoluene	0.000948	0.18428	0.099124	9e-05	0.0912984	0.003933	798
3,5-Xylenol	0.00314	0.263023	0.280404	0.000907	0.180404	0.280793	799
3,7-Dimethyl-1-octanol	4.9e-05	0.191322	0.15937	7e-06	0.516768	0.14024	800
3-Amino-1-propanol.coskf	miscible	#VALUE!	#VALUE!	miscible	#VALUE!	#VALUE!	801
3-Amino-2-chloropyridine	0.018659	0.562185	0.402364	0.006062	0.710281	0.227599	802
3-Aminopyridine.coskf	miscible	#VALUE!	#VALUE!	miscible	#VALUE!	#VALUE!	803
3-Chloro-1,2-propanediol	miscible	#VALUE!	#VALUE!	0.0818	1.09371	0.673173	804
3-Chlorobiphenyl	3.2e-05	0.0411908	0.023165	1e-06	0.00268324	0.000116	805
3-Chloro-o-xylene	0.000177	0.0455448	0.018885	1.5e-05	0.00276224	9.2e-05	806
3-Chloropropene	0.006862	0.148747	0.039278	0.001118	0.0125013	0.000207	807
3-Chloropropyltrichlorosilane	5.5e-05	0.0429664	0.021966	3e-06	0.00278838	0.000112	808
3-chloropropyltrimethoxysilane	0.00018	0.188877	0.113473	5.3e-05	0.655919	0.050839	809
3-Ethyl-1-heptanol	0.000131	0.216294	0.17471	2.2e-05	0.536447	0.150369	810
3-Ethyl-1-hexene	3.1e-05	0.0236803	0.009606	2e-06	0.000955067	4e-05	811
3-Ethyl-1-pentene	0.000117	0.032473	0.011712	1e-05	0.00155749	5.3e-05	812
3-Ethyl-2,5-dimethylthiophene	7.4e-05	0.0411368	0.018126	5e-06	0.00249822	8.8e-05	813
3-Ethylbenzothiophene	8.6e-05	0.0461851	0.023164	5e-06	0.00306292	0.000117	814
3-Ethyldodecane	0	0.0102667	0.007388	0	0.000286637	2.3e-05	815
3-Ethyl_heptanal	0.000153	0.202943	0.105246	4.3e-05	0.896289	0.066371	816
3-Ethylheptane	5e-06	0.0153402	0.007251	0	0.000462503	2.5e-05	817
3-Ethylhexane	1.5e-05	0.0168745	0.007212	1e-06	0.000519222	2.6e-05	818
3-Ethyl-o-xylene	6e-05	0.0373402	0.016758	4e-06	0.00216248	7.9e-05	819
3-Ethylpentane	5.2e-05	0.0195587	0.007321	4e-06	0.000621863	2.7e-05	820
3-Heptanol	0.00048	0.268599	0.172737	0.00011	0.704408	0.15379	821
3-Heptanone	0.000886	0.382509	0.17198	0.000512	2.35466	0.225993	822
3-Hexanol	0.001442	0.348913	0.205411	0.000394	0.905186	0.181847	823
3-Hexanone	0.002911	0.493312	0.208763	0.001958	2.64787	0.267357	824
3-Hexyne	0.000509	0.0709137	0.022172	5.7e-05	0.00514087	0.000118	825
3-Hydroxy-2-methyl_propionaldehyde.coskf	miscible	#VALUE!	#VALUE!	miscible	#VALUE!	#VALUE!	826
3-Hydroxy-4-methyloxybenzoic_acid	0.00818	0.424451	0.461275	0.003458	0.354072	0.425516	827
3-Hydroxybenzaldehyde	0.045241	0.712461	0.634919	0.016139	0.628432	0.488957	828
3-Hydroxybenzoic_acid.coskf	miscible	#VALUE!	#VALUE!	miscible	#VALUE!	#VALUE!	829
3-Hydroxybenzonitrile	0.03652	0.666604	0.609792	0.011958	0.543169	0.509042	830
3-Hydroxybutyrolactone.coskf	miscible	#VALUE!	#VALUE!	miscible	#VALUE!	#VALUE!	831
3-Hydroxypyridine	miscible	#VALUE!	#VALUE!	0.027358	0.839615	0.375148	832
3-Mercaptopropionic_acid	miscible	#VALUE!	#VALUE!	0.102841	0.977044	0.798811	833
[3-(Mercapto)propyl]triethoxysilane	5e-06	0.127343	0.089474	1e-06	0.953997	0.096401	834
3-Methoxy-1-butanol	0.017623	0.788548	0.527823	0.015708	1.70569	0.640446	835
3-Methoxyisopropylamine	0.017228	1.22065	0.554824	0.018619	3.17925	0.707944	836
3-Methoxypropionitrile	0.062999	0.876716	0.484492	0.03478	1.87897	0.172331	837
3-Methyl-1,2-butadiene	0.001467	0.0711898	0.018812	0.00022	0.00453252	9.5e-05	838
3-Methyl-1,4-pentadiene	0.000691	0.0609486	0.018995	8.4e-05	0.00390681	9.6e-05	839
3-Methyl-1-butanol	0.007946	0.560019	0.34663	0.003429	1.20664	0.329447	840
3-Methyl-1-butene	0.000959	0.0529385	0.014308	0.000138	0.00294337	6.9e-05	841
3-Methyl-1-butyne	0.003175	0.124585	0.037384	0.000428	0.0105729	0.000212	842
3-Methyl-1-hexene	0.000106	0.0334388	0.012071	9e-06	0.00163476	5.4e-05	843
3-Methyl-1H-indole	0.002604	0.211295	0.203539	0.000905	0.221737	0.249658	844
3-Methyl-1-pentanol	0.003297	0.450631	0.285779	0.001117	1.12125	0.28074	845
3-Methyl-1-pentene	0.000311	0.0407215	0.01287	3.5e-05	0.0021043	6e-05	846
3-Methyl-2-butanol	0.005825	0.417377	0.245466	0.001826	0.876367	0.205212	847
3-Methyl-2-butanone	0.013817	0.736529	0.321006	0.016131	2.73423	0.435393	848
3-Methyl-2-pentanone	0.004956	0.573601	0.25422	0.004624	2.77357	0.349308	849
3-Methyl-3-ethylpentane	3.1e-05	0.0177572	0.007439	2e-06	0.000562793	2.7e-05	850
3-Methyl-3-pentanol	0.002086	0.374015	0.220537	0.00066	1.03685	0.21146	851
3-Methylacryloxypropyltrichlorosilane.coskf	7e-06	0.0789443	0.052394	0	0.105994	0.006805	852
3-Methylbutyraldehyde	0.009397	0.567518	0.228015	0.006821	2.17583	0.168481	853
3-Methyl-cis-2-pentene	0.000288	0.0385298	0.012121	3.2e-05	0.00191385	5.6e-05	854
3-Methylcyclopentene	0.000556	0.042499	0.012077	7.2e-05	0.00213758	5.7e-05	855
3-Methyldecane	0	0.0128349	0.007337	0	0.000374001	2.4e-05	856
3-Methyldodecane	0	0.0110086	0.007364	0	0.00031012	2.3e-05	857
3-Methylheptane	1.2e-05	0.0171874	0.007302	1e-06	0.000531776	2.6e-05	858
3-Methylhexanal	0.000993	0.300868	0.134424	0.000396	1.14911	0.07619	859
3-Methylhexane	3.7e-05	0.0193832	0.007314	3e-06	0.000614703	2.7e-05	860
3-Methylmercapto-propanal	0.014603	0.55335	0.252143	0.004814	1.25224	0.06184	861
3-Methylnonane	1e-06	0.013983	0.0073	0	0.000416363	2.5e-05	862
3-Methyloctane	4e-06	0.015398	0.007293	0	0.000464707	2.5e-05	863
3-Methylpentane	0.000116	0.0224608	0.007383	1.1e-05	0.000740065	2.9e-05	864
3-Methyl_sulfolane	0.065867	0.863068	0.55726	0.058467	1.27781	0.147149	865
3-Methylthiophene	0.001719	0.0875193	0.027732	0.000238	0.00648884	0.000147	866
3-Methyl-trans-2-pentene	0.000268	0.0378824	0.011898	2.9e-05	0.00185792	5.5e-05	867
3-Methyltridecane	0	0.0102602	0.007388	0	0.000285826	2.3e-05	868
3-Methylundecane	0	0.0117538	0.007304	0	0.00033377	2.3e-05	869
3-Nitrobenzonitrile	0.005701	0.332789	0.182905	0.00066	0.202902	0.009179	870
3-Nitrobenzotrifluoride	0.000392	0.110704	0.054932	3.5e-05	0.0373251	0.001296	871
3-Nitrophenol	0.02143	0.561321	0.549261	0.00798	0.464236	0.51356	872
3-(N,N-Dimethylamino)_propylamine	0.007903	1.24111	0.591761	0.007289	3.75716	0.724181	873
3-Nonanone	9.8e-05	0.245275	0.127477	3.6e-05	1.6801	0.157328	874
3-Octanone	0.000346	0.348033	0.169694	0.000196	2.34888	0.242012	875
3-Pentanol	0.004921	0.468716	0.252807	0.001822	1.30147	0.265502	876
3-Pentanone	0.008655	0.66656	0.272664	0.008282	2.93271	0.364218	877
3-Phenyl-1-propanol	0.002237	0.401747	0.284364	0.000608	0.962082	0.216974	878
3-(Triethoxysilyl)propionitrile	0.000264	0.32283	0.239761	0.000182	1.58696	0.197032	879
3-(Trimethoxysilyl)-1-propanethiol	0.000128	0.174397	0.106125	2.9e-05	0.662526	0.049583	880
4-[2-(2-Aminoethoxy)ethyl]morpholine.coskf	0.009899	1.0939	0.713559	miscible	#VALUE!	#VALUE!	881
4-(2-Aminoethyl)morpholine.coskf	0.016474	1.19941	0.675413	miscible	#VALUE!	#VALUE!	882
4-((2-Hydroxyethoxy)carbonyl)_benzoic_acid.coskf	0.005283	0.435149	0.503346	0.001765	0.452747	0.411366	883
4-(2-Hydroxyethyl)morpholine.coskf	0.024843	1.08073	0.668477	miscible	#VALUE!	#VALUE!	884
4-(2-Methoxyethyl)morpholine	0.006866	0.921862	0.511128	0.019007	1.99403	0.832828	885
4,4'-Dichlorobiphenyl	1.3e-05	0.0366862	0.022906	0	0.00234829	0.000115	886
4,4'-Diisopropylbiphenyl	0	0.0239173	0.018645	0	0.00134929	8.4e-05	887
4,4'-Dinitrodiphenylamine	0.000554	0.235834	0.304625	6e-05	0.174395	0.187902	888
4,4'-Dinitrotriphenylamine	8e-06	0.10982	0.105313	0	0.133394	0.011486	889
4,5,6-Trichloroguaiacol	0.000169	0.0923802	0.097811	2.5e-05	0.0481378	0.101189	890
4,5-Dichloroguaiacol	0.000368	0.111196	0.098868	6.1e-05	0.0542754	0.0791	891
4,6-Dichloroguaiacol	0.000551	0.155331	0.12713	8.8e-05	0.0889381	0.064824	892
4,6-Dimethyldibenzothiophene	1.2e-05	0.0354151	0.02242	0	0.00225898	0.00011	893
4,6-Dinitro-o-sec-butylphenol	5.1e-05	0.0897342	0.064441	3e-06	0.0357066	0.005161	894
4-Aminoacetophenone	0.024886	0.707304	0.585332	0.009417	1.08966	0.437983	895
4-Aminobenzoic_acid	miscible	#VALUE!	#VALUE!	0.039414	0.733848	0.692102	896
4-Aminosalicylic_acid	0.078439	0.840998	0.796561	0.043142	0.798793	0.774884	897
4-Bromobenzoic_acid	0.003654	0.293361	0.327283	0.001099	0.21423	0.328681	898
4-Carboxybenzaldehyde	0.016022	0.528375	0.515902	0.006798	0.474961	0.452063	899
4-Chloro-3-nitrobenzotrifluoride	0.000168	0.0838098	0.046075	1.1e-05	0.0178786	0.000687	900
4-Chlorobenzoic_acid	0.004554	0.311274	0.338697	0.001416	0.231009	0.34177	901
4-Chlorobenzyl_alcohol	0.003968	0.29659	0.24856	0.000844	0.233002	0.137233	902
4-Chlorobiphenyl	3.5e-05	0.0422347	0.02379	2e-06	0.0027832	0.000119	903
4-Chloroguaiacol	0.001027	0.150353	0.111246	0.000181	0.0725501	0.062109	904
4-Chloro-o-xylene	0.000177	0.0478626	0.019992	1.4e-05	0.00300452	0.0001	905
4-Cyclohexene-1,2-dicarboxylic-anhydride.coskf	0.006467	0.319471	0.186036	0.000648	0.154496	0.007437	906
4-Ethyl-m-xylene	4.9e-05	0.0356432	0.01622	3e-06	0.00200431	7.5e-05	907
4-Ethyl-o-xylene	4.5e-05	0.0351602	0.015934	3e-06	0.00196213	7.4e-05	908
4-Fluorobenzoic_acid	0.008748	0.396294	0.392654	0.003607	0.307685	0.37813	909
4-Formylmorpholine.coskf	miscible	#VALUE!	#VALUE!	miscible	#VALUE!	#VALUE!	910
4-Heptanone	0.000969	0.39116	0.176653	0.000589	2.37945	0.233767	911
4-Hexylresorcinol	0.000167	0.160033	0.278681	3.7e-05	0.11077	0.327649	912
4-Hydroxyacetophenone	0.019589	0.604729	0.554192	0.007872	0.663213	0.41461	913
4-Hydroxybenzaldehyde	0.056899	0.77609	0.688087	0.018973	0.735079	0.51715	914
4-Hydroxybenzoic_acid.coskf	miscible	#VALUE!	#VALUE!	miscible	#VALUE!	#VALUE!	915
4-Hydroxybenzonitrile	0.051496	0.748393	0.678556	0.015998	0.610388	0.543549	916
4-Hydroxybenzyl_alcohol	0.08535	0.845364	0.773531	0.02422	0.651003	0.610486	917
4-Hydroxybutyraldehyde.coskf	miscible	#VALUE!	#VALUE!	miscible	#VALUE!	#VALUE!	918
4-Hydroxymethyl_benzoic_acid	0.026893	0.638424	0.656923	0.011045	0.555843	0.569022	919
4-Hydroxystyrene	0.007418	0.359668	0.374975	0.00267	0.300155	0.400553	920
4-Iodobenzoic_acid	0.001984	0.255601	0.299115	0.000636	0.17975	0.303883	921
4-Iodophenol	0.005891	0.327885	0.363689	0.00219	0.28987	0.415071	922
4-Isobutylstyrene	1.4e-05	0.0324325	0.017839	1e-06	0.00186414	8.4e-05	923
4-Methoxyphenylacetic_acid	0.004482	0.346217	0.375086	0.001185	0.282005	0.316807	924
4-Methyl-1-heptene	3.4e-05	0.0263093	0.010713	2e-06	0.00115595	4.6e-05	925
4-Methyl-1-hexene	0.000111	0.0337586	0.012258	9e-06	0.00165534	5.5e-05	926
4-Methyl-1H-imidazole.coskf	miscible	#VALUE!	#VALUE!	miscible	#VALUE!	#VALUE!	927
4-Methyl-1-octanol	0.000107	0.213359	0.17233	1.7e-05	0.525768	0.147094	928
4-Methyl-1-pentene	0.000309	0.0416116	0.013229	3.5e-05	0.00217119	6.2e-05	929
4-Methyl-2-pentanol	0.003594	0.487217	0.296953	0.001333	1.40603	0.328313	930
4-Methyl-cis-2-pentene	0.000281	0.0399717	0.0126	3.1e-05	0.00204432	5.9e-05	931
4-Methyl-cyclohexane-methanol	0.000976	0.266465	0.200552	0.000222	0.517898	0.154107	932
4-Methylcyclopentene	0.000558	0.0430965	0.012289	7.3e-05	0.00219242	5.8e-05	933
4-Methyl_dibenzothiophene	3.2e-05	0.0418676	0.02488	1e-06	0.0028248	0.000126	934
4-Methylheptane	1.3e-05	0.0171977	0.007305	1e-06	0.000532363	2.6e-05	935
4-Methylmorpholine	0.013575	1.02616	0.469895	0.019521	2.43549	0.729502	936
4-Methylnonane	1e-06	0.0139313	0.007289	0	0.000414353	2.5e-05	937
4-Methyloctane	4e-06	0.0153699	0.007285	0	0.000463542	2.5e-05	938
4-Methylphenanthrene	3.4e-05	0.0436511	0.026486	1e-06	0.00303591	0.000135	939
4-Methylphenol	0.00885	0.372634	0.350482	0.003514	0.279304	0.3406	940
4-Methyl-trans-2-pentene	0.000245	0.036946	0.011507	2.6e-05	0.00178291	5.3e-05	941
4-Nitrobenzonitrile	0.005273	0.31825	0.174148	0.000575	0.180943	0.008225	942
4-Nitrophenol	0.029439	0.62995	0.60291	0.009269	0.502735	0.521443	943
4-Nonanone	0.000144	0.305296	0.159636	7.1e-05	2.30503	0.257224	944
4-Octanone	0.000399	0.366179	0.179711	0.000249	2.48743	0.281217	945
4-tert-Butylphenol	0.000792	0.173902	0.223102	0.000178	0.107936	0.223942	946
4-[(Tetrahydro-2-furanyl)oxy]-1-butanol.coskf	0.003165	0.586324	0.440965	0.003781	1.91783	0.613027	947
5-Chloro-3-pyridinol	0.027384	0.588602	0.5385	0.007182	0.38341	0.336389	948
5-Chloroguaiacol	0.00093	0.14091	0.106145	0.000166	0.0670627	0.065688	949
5-Chlorovanillin	0.003232	0.369424	0.293792	0.000935	0.474243	0.162539	950
5-Ethylidine-2-norbornene	0.000141	0.0407912	0.015982	1.2e-05	0.00235214	7.6e-05	951
5-Ethyl-m-xylene	3.4e-05	0.0332909	0.015074	2e-06	0.00179082	6.8e-05	952
5-Hexen-2-one	0.007583	0.582414	0.260586	0.005293	2.56173	0.234435	953
5-Methyl-1-hexanol	0.000846	0.339518	0.228641	0.000233	0.904003	0.220615	954
5-Methyl-1-hexene	0.000104	0.0344233	0.012529	9e-06	0.00171628	5.7e-05	955
5-Methyl-2-hexanone	0.001564	0.447263	0.208905	0.00112	2.49116	0.266721	956
5-Methylindan	8.6e-05	0.0410012	0.017347	6e-06	0.00246072	8.4e-05	957
5-Methylnonane	1e-06	0.0140059	0.007301	0	0.00041718	2.5e-05	958
5-Nonanone	0.0001	0.237225	0.122598	3.6e-05	1.56261	0.142914	959
5-o-Tolyl-2-pentene	1.4e-05	0.03664	0.019942	1e-06	0.00229542	9.7e-05	960
6-Aminohexanamide.coskf	miscible	#VALUE!	#VALUE!	miscible	#VALUE!	#VALUE!	961
6-Aminohexanol	0.009994	1.02102	0.635907	0.009148	2.59822	0.745239	962
6-Chloronicotinic_acid	0.010087	0.453672	0.442733	0.003837	0.352887	0.358488	963
6-Hydroxyhexanoic_acid	0.03185	0.76088	0.694957	0.015718	0.878519	0.572472	964
6-Methyl-1-heptene	3.2e-05	0.0283501	0.01165	2e-06	0.00132738	5.1e-05	965
6-Methyl-1-octanol	0.000105	0.208862	0.169232	1.6e-05	0.498009	0.140615	966
7-Methyl-1-octene	1e-05	0.0243211	0.011102	0	0.00108548	4.7e-05	967
8-Hydroxyquinoline	0.000907	0.133837	0.069385	0.000136	0.0589747	0.007339	968
8-Methyl-1-nonanol	3.1e-05	0.174847	0.144856	4e-06	0.451696	0.121436	969
8-Methyl-1-nonene	3e-06	0.0210232	0.010572	0	0.000890037	4.3e-05	970
8-Methylquinoline	0.000725	0.397479	0.172955	0.000203	3.6275	0.25963	971
Abietic_acid	2e-06	0.0641416	0.12695	0	0.0348409	0.095148	972
Acenaphthalene	0.000158	0.0515351	0.024612	1.1e-05	0.00349994	0.000124	973
Acenaphthene	9.3e-05	0.0440003	0.02062	6e-06	0.00278988	0.000101	974
Acetal	0.000868	0.377454	0.167825	0.0007	2.4466	0.302981	975
Acetaldehyde.coskf	miscible	#VALUE!	#VALUE!	miscible	#VALUE!	#VALUE!	976
Acetaldol.coskf	miscible	#VALUE!	#VALUE!	miscible	#VALUE!	#VALUE!	977
Acetaldoxime.coskf	miscible	#VALUE!	#VALUE!	miscible	#VALUE!	#VALUE!	978
Acetamide.coskf	miscible	#VALUE!	#VALUE!	miscible	#VALUE!	#VALUE!	979
Acetaminophen	0.030903	0.691751	0.683223	0.00947	0.629002	0.511987	980
Acetanilide	0.007064	0.475312	0.368125	0.001937	0.728538	0.233194	981
Acetic_acid.coskf	miscible	#VALUE!	#VALUE!	miscible	#VALUE!	#VALUE!	982
Acetic_anhydride	0.05422	0.90976	0.492921	0.030825	2.85935	0.317278	983
Acetoacetanilide	0.001472	0.410208	0.259032	0.000652	1.83035	0.195713	984
Acetoacetic_acid.coskf	miscible	#VALUE!	#VALUE!	miscible	#VALUE!	#VALUE!	985
Acetoin.coskf	miscible	#VALUE!	#VALUE!	miscible	#VALUE!	#VALUE!	986
Acetol.coskf	miscible	#VALUE!	#VALUE!	miscible	#VALUE!	#VALUE!	987
Acetomethoxane	0.001133	0.324927	0.190007	0.000656	0.879905	0.070031	988
Acetone.coskf	miscible	#VALUE!	#VALUE!	miscible	#VALUE!	#VALUE!	989
Acetone_cyanohydrin	miscible	#VALUE!	#VALUE!	0.079521	0.950896	0.617836	990
Acetonitrile.coskf	miscible	#VALUE!	#VALUE!	miscible	#VALUE!	#VALUE!	991
Acetovanillone	0.002844	0.411028	0.29848	0.000988	0.896407	0.196418	992
Acetoxyacetic_acid	miscible	#VALUE!	#VALUE!	0.059747	0.89678	0.69532	993
Acetylacetone	0.100384	0.958904	0.635113	0.178793	1.45845	0.556471	994
Acetyl_chloride	0.020535	0.286383	0.080773	0.003791	0.0376332	0.000606	995
Acetylene	miscible	#VALUE!	#VALUE!	0.048074	0.103561	0.001596	996
Acetylsalicylic_acid	0.003249	0.302032	0.338631	0.000858	0.229683	0.303989	997
Acridine	0.00022	0.32661	0.163494	4.9e-05	3.28185	0.247808	998
Acrolein_cyanohydrin	miscible	#VALUE!	#VALUE!	0.093353	0.935574	0.711627	999
Acrylamide.coskf	miscible	#VALUE!	#VALUE!	miscible	#VALUE!	#VALUE!	1000
Acrylic_acid.coskf	miscible	#VALUE!	#VALUE!	miscible	#VALUE!	#VALUE!	1001
Acryloxy_propionic_acid	0.019768	0.622951	0.562212	0.008711	0.627125	0.450414	1002
Acyclovir.coskf	miscible	#VALUE!	#VALUE!	miscible	#VALUE!	#VALUE!	1003
Adamantane	4.1e-05	0.0162723	0.006764	3e-06	0.000478245	2.4e-05	1004
Adipic_acid.coskf	miscible	#VALUE!	#VALUE!	miscible	#VALUE!	#VALUE!	1005
Adiponitrile	0.085464	0.905209	0.637776	0.023825	1.62707	0.159573	1006
Agathadiol	8e-06	0.176977	0.233506	1e-06	0.607933	0.243803	1007
Allyl_acetate	0.008671	0.517919	0.221983	0.00454	1.32479	0.07671	1008
Allyl_acrylate	0.002951	0.341622	0.148958	0.000953	0.73668	0.038421	1009
Allylamine	0.079856	1.18539	0.639192	0.045094	2.93789	0.65536	1010
Allyl_ether	0.002163	0.385235	0.150928	0.000902	2.13468	0.153687	1011
Allyl_glycidyl_ether	0.006254	0.51447	0.244502	0.004126	1.92207	0.157333	1012
Allylidene_diacetate	0.001872	0.309225	0.17611	0.00042	0.397263	0.021879	1013
Allyl_methacrylate	0.000882	0.225027	0.10271	0.000211	0.319105	0.015272	1014
Allyl-tert-butylperoxide	0.00047	0.219337	0.101892	0.000144	0.794092	0.050339	1015
alpha-Epichlorohydrin	0.023568	0.489743	0.189566	0.005973	0.567627	0.018588	1016
alpha-Hydroxyisobutyramide.coskf	miscible	#VALUE!	#VALUE!	miscible	#VALUE!	#VALUE!	1017
alpha-Hydroxyisobutyric_acid	0.116444	0.923111	0.787266	0.030991	0.73243	0.54677	1018
alpha-Methylbenzyl_alcohol	0.004061	0.393735	0.264471	0.00105	0.805189	0.186469	1019
alpha-Methylbenzyl_alcohol_formate	0.000933	0.198885	0.105936	0.000136	0.202817	0.00931	1020
alpha-Methylstyrene	0.00028	0.056272	0.022999	2.5e-05	0.00379184	0.000116	1021
alpha-Phellandrene	2.8e-05	0.0289121	0.013375	2e-06	0.0014444	5.9e-05	1022
alpha-Pinene	2.6e-05	0.0205853	0.009044	1e-06	0.000783161	3.6e-05	1023
alpha-Terpinene	2.5e-05	0.0288304	0.013233	1e-06	0.00144625	5.8e-05	1024
alpha-Terpineol	0.000295	0.248499	0.178629	6e-05	0.798544	0.161257	1025
alpha-Tocopherol	0	0.0203113	0.040242	0	0.0106357	0.01267	1026
Aminoacetonitrile.coskf	miscible	#VALUE!	#VALUE!	miscible	#VALUE!	#VALUE!	1027
Aminocapronitrile	0.022909	1.17703	0.663307	0.026344	3.07912	0.740691	1028
Aminopyrine	7.8e-05	0.29648	0.212956	5e-05	2.31706	0.376841	1029
Ammonia.coskf	miscible	#VALUE!	#VALUE!	miscible	#VALUE!	#VALUE!	1030
Amobarbital	0.001844	0.313403	0.445651	0.000986	0.297856	0.434984	1031
Androstanolone	6.4e-05	0.269928	0.291635	3.5e-05	1.37675	0.399265	1032
Anethole	0.000128	0.0777347	0.038614	9e-06	0.0236679	0.000775	1033
Aniline	0.022672	0.522168	0.323099	0.006693	0.645014	0.140971	1034
Anthracene	4.6e-05	0.0439533	0.024718	2e-06	0.00295264	0.000124	1035
Anthraquinone	0.000288	0.171688	0.111354	5.4e-05	0.170595	0.011114	1036
Antipyrine	0.00146	0.614173	0.384051	0.001504	3.02521	0.595861	1037
Ascorbic_acid.coskf	miscible	#VALUE!	#VALUE!	miscible	#VALUE!	#VALUE!	1038
Atrazine	9.9e-05	0.189843	0.179493	1.5e-05	0.342976	0.1221	1039
Azelaic_acid	0.002031	0.363821	0.477098	0.000985	0.342866	0.474864	1040
Aziridine.coskf	miscible	#VALUE!	#VALUE!	miscible	#VALUE!	#VALUE!	1041
Barbital	0.038713	0.704205	0.734051	0.032844	0.753199	0.728032	1042
Benzaldehyde	0.009174	0.492435	0.218352	0.004605	1.37204	0.088448	1043
Benzamide	0.069583	0.866834	0.742683	0.021988	1.08019	0.57665	1044
Benzanthracene	1e-05	0.0403729	0.028904	0	0.00287696	0.000151	1045
Benzene-1,2,4-tricarboxylic_acid_trimethyl_ester.coskf	0.000254	0.219778	0.171772	5.3e-05	0.290513	0.024002	1046
Benzene	0.003273	0.0951726	0.026555	0.0005	0.00691339	0.000136	1047
Benzenesulfonic_acid	0.015982	0.519816	0.56366	0.006721	0.483217	0.594235	1048
Benzidine	0.002963	0.252544	0.306247	0.001066	0.190939	0.183633	1049
Benzoic_acid	0.012195	0.436405	0.406538	0.005281	0.344536	0.375734	1050
Benzonitrile	0.0077	0.390922	0.169861	0.001786	0.467394	0.019255	1051
Benzothiophene	0.000595	0.0703851	0.028969	5.8e-05	0.00521447	0.000154	1052
Benzotrichloride	7.5e-05	0.0375941	0.017974	5e-06	0.00216028	8.6e-05	1053
Benzotrifluoride	0.000363	0.0538454	0.020913	3.7e-05	0.00343365	0.000107	1054
Benzoyl_chloride	0.000624	0.08688	0.034967	6.4e-05	0.0114131	0.000287	1055
Benzoyl_peroxide	2.3e-05	0.0933033	0.066926	1e-06	0.0483447	0.00292	1056
Benzyl_acetate	0.000846	0.252324	0.130127	0.000199	0.557885	0.031884	1057
Benzyl_alcohol	0.010319	0.509159	0.337433	0.003693	0.821332	0.221123	1058
Benzyl_benzoate	3.7e-05	0.103641	0.068524	3e-06	0.103403	0.006302	1059
Benzyl_chloride	0.000737	0.0800352	0.031547	7.2e-05	0.00618825	0.000169	1060
Benzyl_dichloride	0.000337	0.0688226	0.032155	2.8e-05	0.00530331	0.000178	1061
Benzyl_ethyl_ether	0.00018	0.111338	0.048206	2.6e-05	0.327011	0.012845	1062
Benzyl_formate	0.004427	0.333386	0.181282	0.000705	0.369293	0.018958	1063
Benzyl_mercaptan	0.000877	0.0996043	0.042058	7.6e-05	0.0087994	0.000239	1064
beta-Carotene	0	0.0105062	0.018564	0	0.000507679	7.2e-05	1065
beta-Cholesterol	0	0.0575023	0.083014	0	0.178957	0.060444	1066
Betamethasone_acetate	9.1e-05	0.253407	0.406407	2.7e-05	0.644194	0.323163	1067
Betamethasone	0.001057	0.421507	0.594105	0.000509	1.14843	0.582221	1068
beta-Phellandrene	3.6e-05	0.0314523	0.014576	2e-06	0.00166276	6.6e-05	1069
beta-Pinene	4.5e-05	0.026844	0.011823	3e-06	0.00126979	5.2e-05	1070
beta-Propiolactone	miscible	#VALUE!	#VALUE!	0.061501	1.02238	0.052505	1071
beta-Terpineol	0.000261	0.221494	0.162904	4.6e-05	0.654555	0.131184	1072
Bicyclo[2.2.1]heptane	0.000221	0.0239111	0.007516	2.4e-05	0.000806289	3e-05	1073
Bicyclo[2.2.2]octane	8.6e-05	0.019156	0.006895	7e-06	0.000588861	2.6e-05	1074
Bicyclohexyl	2e-06	0.0120967	0.006689	0	0.000331969	2.2e-05	1075
Biphenyl	9.3e-05	0.0503743	0.025411	5e-06	0.00348645	0.000129	1076
Bis-(2-aminoethyl)ether.coskf	miscible	#VALUE!	#VALUE!	miscible	#VALUE!	#VALUE!	1077
Bis-2-chloroethyl-2-chloroethyl_phosphonate.coskf	0.001213	0.426309	0.338384	0.000387	2.04863	0.312015	1078
Bis-2-chloroethyl_sulfide	0.000595	0.107271	0.050534	3.8e-05	0.00989835	0.000292	1079
Bis-2-hydroxyethyl-terephthalate	0.001688	0.416305	0.496617	0.000854	0.643471	0.403989	1080
Bis[3-(triethoxysilyl)propyl]disulfide.coskf	0	0.0875409	0.114727	0	0.639537	0.12212	1081
Bis[3-(trimethoxysilyl)propyl]disulfide.coskf	0	0.0969554	0.107598	0	0.364188	0.050609	1082
Bis(alpha-methylbenzyl)_ether	5e-06	0.0572791	0.039238	0	0.224722	0.010163	1083
Bis-chloromethyl_ether	0.007147	0.192425	0.06843	0.00093	0.0206882	0.000431	1084
Bis-cyanoethyl_ether	0.029003	0.718605	0.474081	0.007196	1.00137	0.079882	1085
Bis-difluoromethyl_ether	0.016648	0.285013	0.106348	0.003034	0.0354125	0.000851	1086
Bisphenol_A	0.000593	0.215547	0.394418	0.000167	0.174303	0.447606	1087
Bis(trifluoromethyl)sulfide	0.000183	0.0223185	0.006967	1.9e-05	0.000701987	2.7e-05	1088
Boric_acid.coskf	miscible	#VALUE!	#VALUE!	miscible	#VALUE!	#VALUE!	1089
Boron_tribromide	0.00076	0.0447656	0.012649	0.000106	0.00222772	6e-05	1090
Boron_trichloride	0.001729	0.0563819	0.013652	0.0003	0.00318522	7e-05	1091
Boron_trifluoride	0.07253	0.498229	0.125374	0.018183	0.0872815	0.001226	1092
Bromine	0.011187	0.107515	0.020794	0.002855	0.00711974	0.000113	1093
Bromobenzene	0.000882	0.0681896	0.023847	0.000106	0.00463358	0.000122	1094
Bromochlorodifluoromethane	0.001183	0.0402898	0.009717	0.000191	0.00174449	4.7e-05	1095
Bromochloromethane	0.014792	0.209406	0.05807	0.002842	0.0190447	0.000307	1096
Bromodifluoromethane	0.015022	0.208591	0.056933	0.003473	0.020347	0.000341	1097
Bromoethane	0.009173	0.157576	0.036546	0.001761	0.0131721	0.000189	1098
Bromotrichloromethane	0.000482	0.0377379	0.011794	6.2e-05	0.00176102	5.5e-05	1099
Bromotrifluoroethylene	0.00106	0.0412512	0.010038	0.000166	0.00183007	4.9e-05	1100
Bromotrifluoromethane	0.001968	0.0426222	0.008969	0.00037	0.00175466	4.3e-05	1101
Butabarbital	0.005784	0.385589	0.506139	0.003386	0.380091	0.492849	1102
Butanal	0.027815	0.795525	0.324821	0.025129	2.67703	0.300762	1103
Butane	0.000792	0.0316752	0.007372	0.000119	0.00109349	3.1e-05	1104
Butanenitrile	0.040675	0.801589	0.354816	0.019546	1.69893	0.101389	1105
Butanoic_acid	0.044596	0.706531	0.555077	0.02065	0.64406	0.462256	1106
Butyl_4-hydroxybenzoate	0.00025	0.191284	0.262545	4.9e-05	0.150018	0.227691	1107
Butyl_p-aminobenzoate	0.000274	0.221335	0.221826	4.7e-05	0.246658	0.116818	1108
Butyl_vinyl_ether	0.000535	0.122151	0.044491	7.9e-05	0.0812917	0.002153	1109
Butyric_anhydride	0.000313	0.206212	0.111188	6.4e-05	0.3051	0.016151	1110
Caffeine.coskf	0.028923	0.945675	0.69501	miscible	#VALUE!	#VALUE!	1111
Camphene	5.4e-05	0.0270665	0.011893	4e-06	0.00128115	5.2e-05	1112
Camphor	0.001003	0.349306	0.187056	0.000664	1.92345	0.220624	1113
Caprinitrile	3.9e-05	0.142925	0.081594	5e-06	0.240699	0.014566	1114
Carbamyl_chloride.coskf	miscible	#VALUE!	#VALUE!	miscible	#VALUE!	#VALUE!	1115
Carbon_dioxide	0.07289	0.275891	0.043246	0.019668	0.0226971	0.000192	1116
Carbon_disulfide	0.002499	0.0370177	0.007149	0.000486	0.00126739	3.1e-05	1117
Carbon_monoxide	0.050131	0.117793	0.011887	0.016866	0.00636494	6.2e-05	1118
Carbon_tetrafluoride	0.00413	0.0392806	0.00647	0.000869	0.0012638	2.8e-05	1119
Carbonyl_fluoride	0.028171	0.189424	0.031938	0.007515	0.0148435	0.000167	1120
Carbonyl_sulfide	0.010499	0.0781329	0.012042	0.002823	0.00399264	6e-05	1121
Cellobiose	0.004255	0.466363	0.567998	0.002007	0.814072	0.528435	1122
Cetyl_methacrylate	0	0.0328067	0.032168	0	0.0374731	0.003679	1123
Chlorine	0.015427	0.0919367	0.014198	0.004379	0.00500038	7.3e-05	1124
Chloroacetaldehyde	0.072063	0.674514	0.290459	0.013056	0.469497	0.014464	1125
Chloroacetic_acid.coskf	miscible	#VALUE!	#VALUE!	miscible	#VALUE!	#VALUE!	1126
Chloroacetyl_chloride	0.00992	0.234463	0.08557	0.001426	0.0265461	0.000632	1127
Chlorobenzene	0.001101	0.0710035	0.02377	0.000141	0.00482826	0.000122	1128
Chlorocyclohexane	0.000374	0.0544306	0.018941	4.1e-05	0.00355838	9.6e-05	1129
Chlorodifluoromethane	0.019932	0.237485	0.061595	0.005039	0.0236442	0.000363	1130
Chloroethane	0.013116	0.178474	0.03906	0.002731	0.0152923	0.0002	1131
Chlorofluoromethane	0.052018	0.370799	0.097713	0.010145	0.0369084	0.000482	1132
Chloroform	0.004207	0.113067	0.034331	0.000713	0.00941389	0.000212	1133
Chloromethane	0.056125	0.332448	0.068653	0.012446	0.0309057	0.000301	1134
Chloro_methyl_methyl_ether	0.030059	0.55814	0.19248	0.009408	0.8905	0.029408	1135
Chloropentafluoroethane	0.000353	0.0244846	0.006898	4.5e-05	0.000779211	2.8e-05	1136
Chloroprene	0.00262	0.0928229	0.027121	0.00039	0.00673158	0.000143	1137
Chloropyrifos	0	0.0291058	0.024736	0	0.00272048	0.000164	1138
Chlorosulfonic_acid.coskf	miscible	#VALUE!	#VALUE!	miscible	#VALUE!	#VALUE!	1139
Chlorotrifluoroethylene	0.001242	0.038886	0.008806	0.000206	0.00155474	4e-05	1140
Chlorotrifluoromethane	0.00239	0.03922	0.007635	0.000459	0.00141726	3.4e-05	1141
Cholesterol_acetate	0	0.0309284	0.037818	0	0.0638416	0.007273	1142
Cholesteryl_benzoate	0	0.0208019	0.028955	0	0.0197136	0.002334	1143
Chrysene	8e-06	0.0356104	0.025219	0	0.00236499	0.000127	1144
Cimetidine	0.003418	0.51263	0.602911	0.000505	0.787452	0.411102	1145
Cinnamic_acid	0.004772	0.365751	0.350858	0.001259	0.330281	0.258302	1146
cis-1,2-Dichloroethene	0.006606	0.132157	0.036388	0.001198	0.0107693	0.000202	1147
cis-1,2-Dimethylcyclohexane	4.6e-05	0.0181003	0.007076	3e-06	0.000558725	2.6e-05	1148
cis-1,2-Dimethylcyclopentane	0.000107	0.0209591	0.007249	1e-05	0.000676099	2.8e-05	1149
cis-1,3-Dichloropropene	0.003501	0.130126	0.043049	0.00044	0.0111823	0.000237	1150
cis-1,3-Dimethylcyclohexane	5.9e-05	0.0188124	0.00731	5e-06	0.000595856	2.7e-05	1151
cis-1,3-Dimethylcyclopentane	8e-05	0.0206635	0.007169	7e-06	0.000655651	2.7e-05	1152
cis-1,3-Pentadiene	0.001963	0.0860623	0.02337	0.000303	0.00604483	0.00012	1153
cis-1,4-Dimethylcyclohexane	4.5e-05	0.0185074	0.007235	3e-06	0.000583097	2.7e-05	1154
cis-1,8-Terpin	0.0023	0.498063	0.447833	0.001136	1.38841	0.518674	1155
cis-1-Propenylbenzene	0.000244	0.0541122	0.021817	2.1e-05	0.00357508	0.000109	1156
cis-2-Butene-1,4-diol.coskf	miscible	#VALUE!	#VALUE!	miscible	#VALUE!	#VALUE!	1157
cis-2-Butene	0.002682	0.0723467	0.016237	0.000469	0.00438317	8.1e-05	1158
cis-2-Decene	2e-06	0.0203534	0.010169	0	0.000845939	4.1e-05	1159
cis-2-Dodecene	0	0.0164183	0.009757	0	0.000635417	3.7e-05	1160
cis-2-Heptene	7.6e-05	0.0322909	0.01167	6e-06	0.00154906	5.2e-05	1161
cis-2-Hexene	0.000238	0.039925	0.012583	2.5e-05	0.00203884	5.8e-05	1162
cis-2-Methylcyclohexanol	0.002278	0.361534	0.231008	0.000754	0.918032	0.221015	1163
cis-2-Nonene	8e-06	0.0232969	0.010511	0	0.00101153	4.4e-05	1164
cis-2-Octene	2.4e-05	0.0270483	0.011027	1e-06	0.00123495	4.8e-05	1165
cis-2-Pentene	0.000753	0.0508718	0.013739	0.000103	0.00277319	6.6e-05	1166
cis-2-Phenyl-2-butene	9.6e-05	0.0447459	0.019912	6e-06	0.00281441	9.8e-05	1167
cis-3-Heptene	7e-05	0.0308138	0.011024	5e-06	0.00143962	4.9e-05	1168
cis-3-Hexene	0.000205	0.0376577	0.011817	2.1e-05	0.00185042	5.4e-05	1169
cis-3-Methylcyclohexanol	0.001687	0.324961	0.20281	0.000487	0.798149	0.181892	1170
cis-3-Octene	2.4e-05	0.0265881	0.010776	1e-06	0.00119946	4.7e-05	1171
cis-4-Methylcyclohexanol	0.003066	0.452057	0.287187	0.001114	1.28352	0.312514	1172
cis-4-Octene	2.2e-05	0.0261923	0.010673	1e-06	0.0011713	4.6e-05	1173
cis-Crotonaldehyde	0.033929	0.789507	0.314784	0.022688	2.6339	0.236024	1174
cis-Crotonic_acid	0.056614	0.721787	0.565014	0.02526	0.614049	0.481419	1175
cis-Crotonitrile	0.048027	0.767909	0.33558	0.018077	1.2806	0.063089	1176
cis-Decahydronaphthalene	1.5e-05	0.0152037	0.006876	1e-06	0.000445756	2.4e-05	1177
cis-Dicyano-1-butene	0.056176	0.799507	0.54635	0.009238	1.00597	0.081273	1178
cis-Stilbene	2.3e-05	0.0405895	0.023899	1e-06	0.00268677	0.000118	1179
cis,trans-2,4-Hexadiene	0.000569	0.061501	0.019127	6.6e-05	0.00397065	9.7e-05	1180
Citraconic_acid	miscible	#VALUE!	#VALUE!	0.03369	0.808385	0.640927	1181
Citric_acid.coskf	miscible	#VALUE!	#VALUE!	miscible	#VALUE!	#VALUE!	1182
Codeine	7.5e-05	0.31643	0.256005	3e-05	2.60746	0.339885	1183
Cortisone_acetate	0.000137	0.294002	0.396805	9.6e-05	1.07116	0.343467	1184
Cortisone	0.002798	0.542929	0.654399	0.005056	1.56387	0.741182	1185
Cumene	0.000154	0.0440041	0.017925	1.3e-05	0.00262535	8.6e-05	1186
Cumene_hydroperoxide	0.001246	0.212939	0.163985	0.000263	0.166468	0.077361	1187
Cyanazine	0.000126	0.176027	0.202853	1.7e-05	0.17697	0.114568	1188
Cyanogen_chloride	0.124311	0.694773	0.228744	0.026698	0.286997	0.005224	1189
Cyanogen	0.042772	0.343567	0.083583	0.008341	0.0345376	0.000389	1190
Cyclobutane	0.001771	0.0380508	0.007849	0.000326	0.0013975	3.4e-05	1191
Cycloheptane	0.000101	0.0195031	0.006743	9e-06	0.000588883	2.5e-05	1192
Cycloheptene	0.000244	0.0338847	0.01089	2.7e-05	0.0016106	5e-05	1193
Cyclohexanecarboxaldehyde	0.002491	0.366561	0.154933	0.001333	1.37917	0.09336	1194
Cyclohexane	0.00024	0.022633	0.006739	2.7e-05	0.00069946	2.6e-05	1195
Cyclohexanol	0.007113	0.567125	0.344722	0.003337	1.44457	0.375086	1196
Cyclohexanone	0.016764	0.875627	0.41441	0.028744	2.20086	0.675799	1197
Cyclohexanone_oxime	0.006917	0.416768	0.305988	0.002427	0.532173	0.202178	1198
Cyclohexene	0.000651	0.0440052	0.012256	8.8e-05	0.00226932	5.8e-05	1199
Cyclohexyl_acetate	0.000512	0.242687	0.117311	0.0002	0.761081	0.049349	1200
Cyclohexylamine	0.004136	1.06577	0.418505	0.001964	5.21751	0.524145	1201
Cyclohexylbenzene	1.9e-05	0.0292097	0.015029	1e-06	0.00153057	6.7e-05	1202
[truncated: 1,220 more rows]
